# Supplementary material for: Facile synthesis of substituted quinolines by iron(iii)-catalyzed cascade reaction between anilines, aldehydes and nitroalkanes
Source: Royal Society of Chemistry journal article supplement (doi:10.1039/c9ob01294j), 2019-01-01
Supplement: c9ob01294j1.pdf [file c9ob01294j1.pdf]

## Supporting Information

### Facile synthesis of substituted quinolines by iron(III)-catalyzed cascade reaction between anilines, aldehydes and nitroalkanes

Sachinta Mahato,<sup>a</sup> Anindita Mukherjee,<sup>b</sup> Sougata Santra,<sup>b\*</sup> Grigory V. Zyryanov<sup>bc</sup> and

Adinath Majee<sup>a\*</sup>

<sup>a</sup>*Department of Chemistry; Visva-Bharati (A Central University), Santiniketan 731235, India.*

<sup>b</sup>*Department of Organic and Biomolecular Chemistry, Chemical Engineering Institute, Ural  
Federal University, 19 Mira Street, 620002, Yekaterinburg, Russian Federation.*

<sup>c</sup>*I. Ya. Postovskiy Institute of Organic Synthesis, Ural Division of the Russian Academy of  
Sciences, 22 S. Kovalevskoy Street, 620219 Yekaterinburg, Russian Federation.*

### Table of Contents

|                                                                     |              |
|---------------------------------------------------------------------|--------------|
| <sup>1</sup> H & <sup>13</sup> C NMR Spectra of all compounds ..... | Page S3-S120 |
|---------------------------------------------------------------------|--------------|

**$^1\text{H}$  &  $^{13}\text{C}$  NMR Spectra of all compounds**

1H of VBSSM-423/7

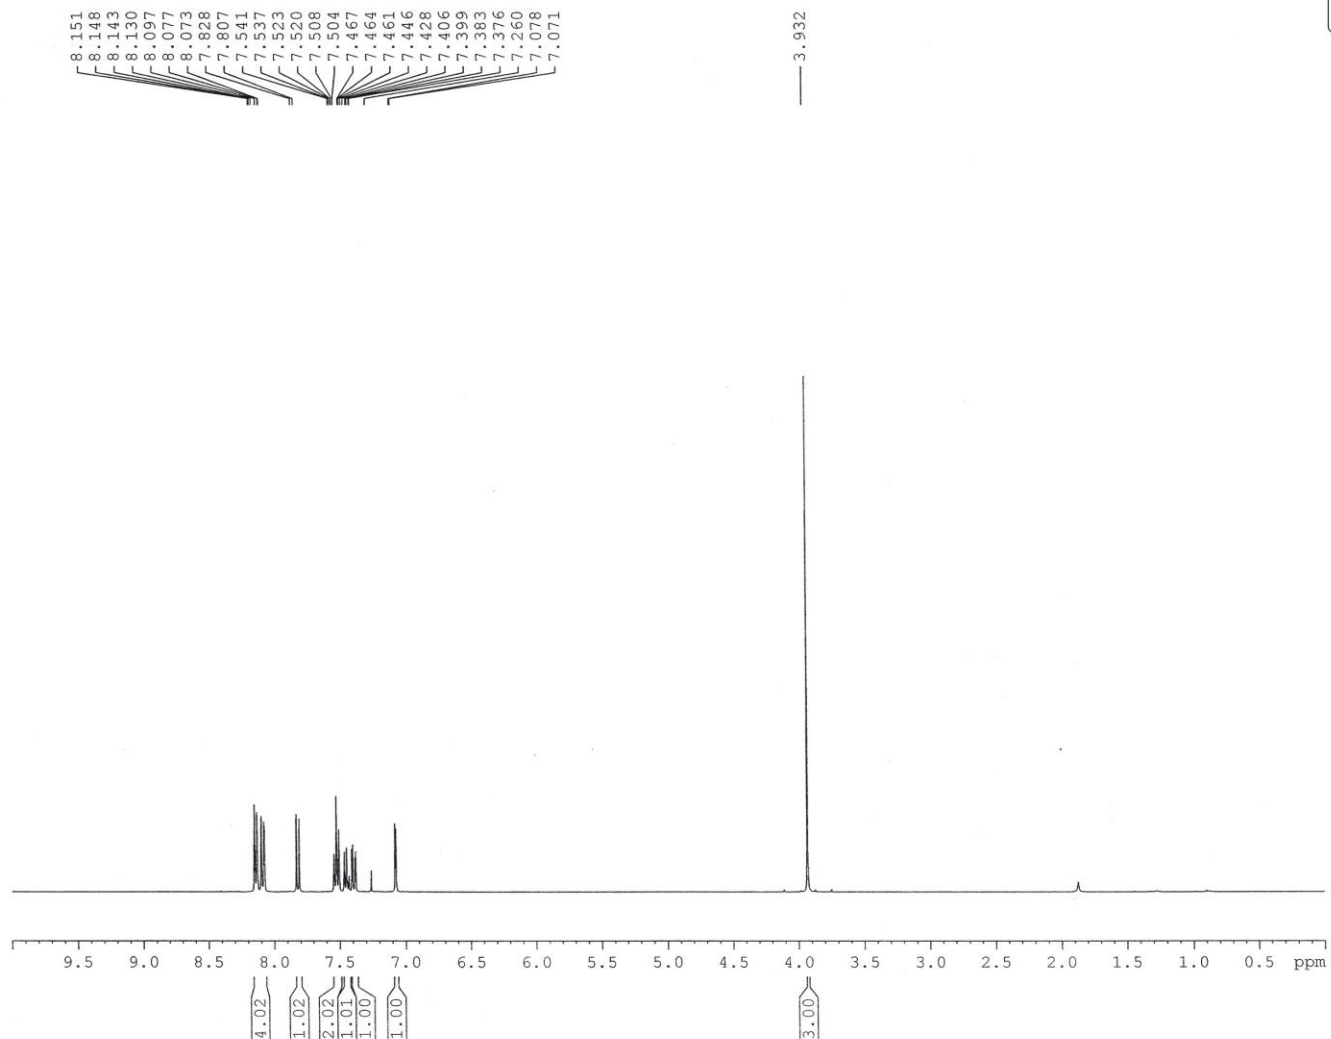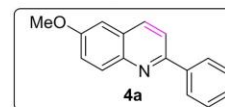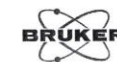

Current Data Parameters  
NAME Dr. A MAJEE 2018  
EXPNO 846  
PROCNO 1

F2 - Acquisition Parameters  
Date\_ 20181221  
Time 18.38  
INSTRUM spect  
PROBHD 5 mm PABBO BB/  
PULPROG zg30  
TD 32768  
SOLVENT CDC13  
NS 20  
DS 1  
SWH 8223.685 Hz  
FIDRES 0.250967 Hz  
AQ 1.9922944 sec  
RG 67.81  
DW 60.800 usec  
DE 6.50 usec  
TE 295.6 K  
D1 1.00000000 sec  
TD0 1

===== CHANNEL f1 =====  
SFO1 400.1524711 MHz  
NUC1 1H  
P1 14.75 usec  
PLW1 12.00000000 W

F2 - Processing parameters  
SI 16384  
SF 400.1500096 MHz  
WDW EM  
SSB 0  
LB 0.30 Hz  
GB 0  
PC 1.00

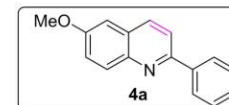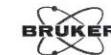

Current Data Parameters  
 NAME Dr. A MAJEE 2018  
 EXPNO 853  
 PROCNO 1

F2 - Acquisition Parameters  
 Date\_ 20181221  
 Time 18.51  
 INSTRUM spect  
 PROBHD 5 mm PABBO BB/  
 PULPROG zgpg30  
 TD 32768  
 SOLVENT CDC13  
 NS 256  
 DS 2  
 SWH 24038.461 Hz  
 FIDRES 0.733596 Hz  
 AQ 0.6815744 sec  
 RG 186.42  
 DW 20.800 usec  
 DE 6.50 usec  
 TE 296.3 K  
 D1 2.00000000 sec  
 D11 0.03000000 sec  
 TD0 1

===== CHANNEL f1 =====  
 SFO1 100.6278588 MHz  
 NUC1 13C  
 P1 8.90 usec  
 PLW1 54.00000000 W

===== CHANNEL f2 =====  
 SFO2 400.1516006 MHz  
 NUC2 1H  
 CPDPRG2 waltz16  
 PCPD2 90.00 usec  
 PLW2 12.00000000 W  
 PLW12 0.32231000 W  
 PLW13 0.16212000 W

F2 - Processing parameters  
 SI 16384  
 SF 100.6177900 MHz  
 WDW EM  
 SSB 0  
 LB 1.00 Hz  
 GB 0  
 PC 2.00

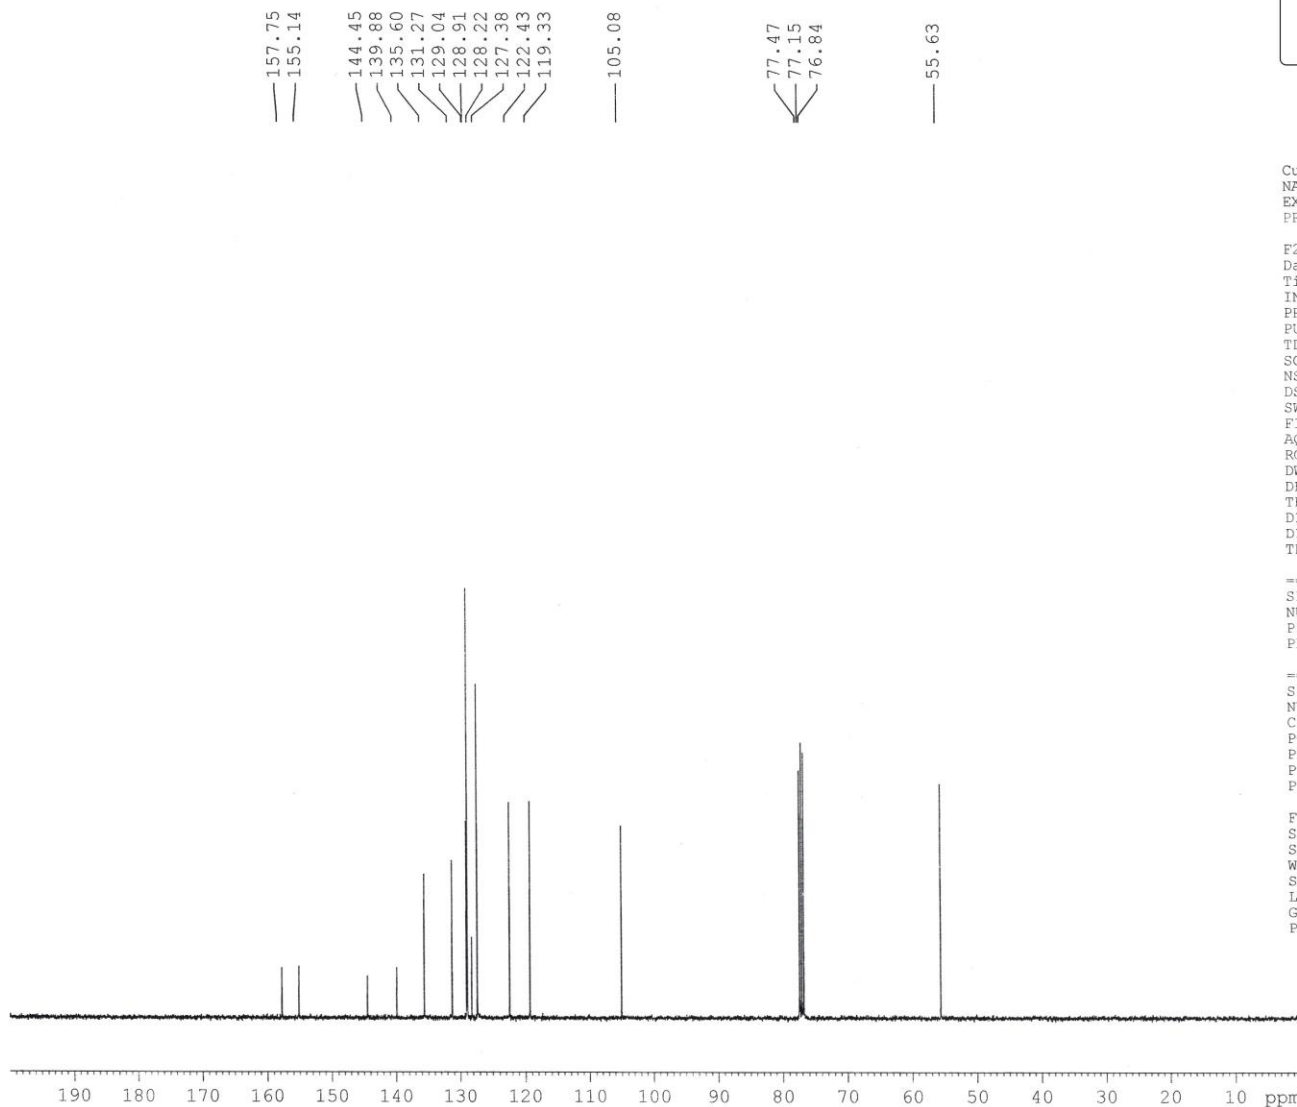

1H of VBSSM 423/2

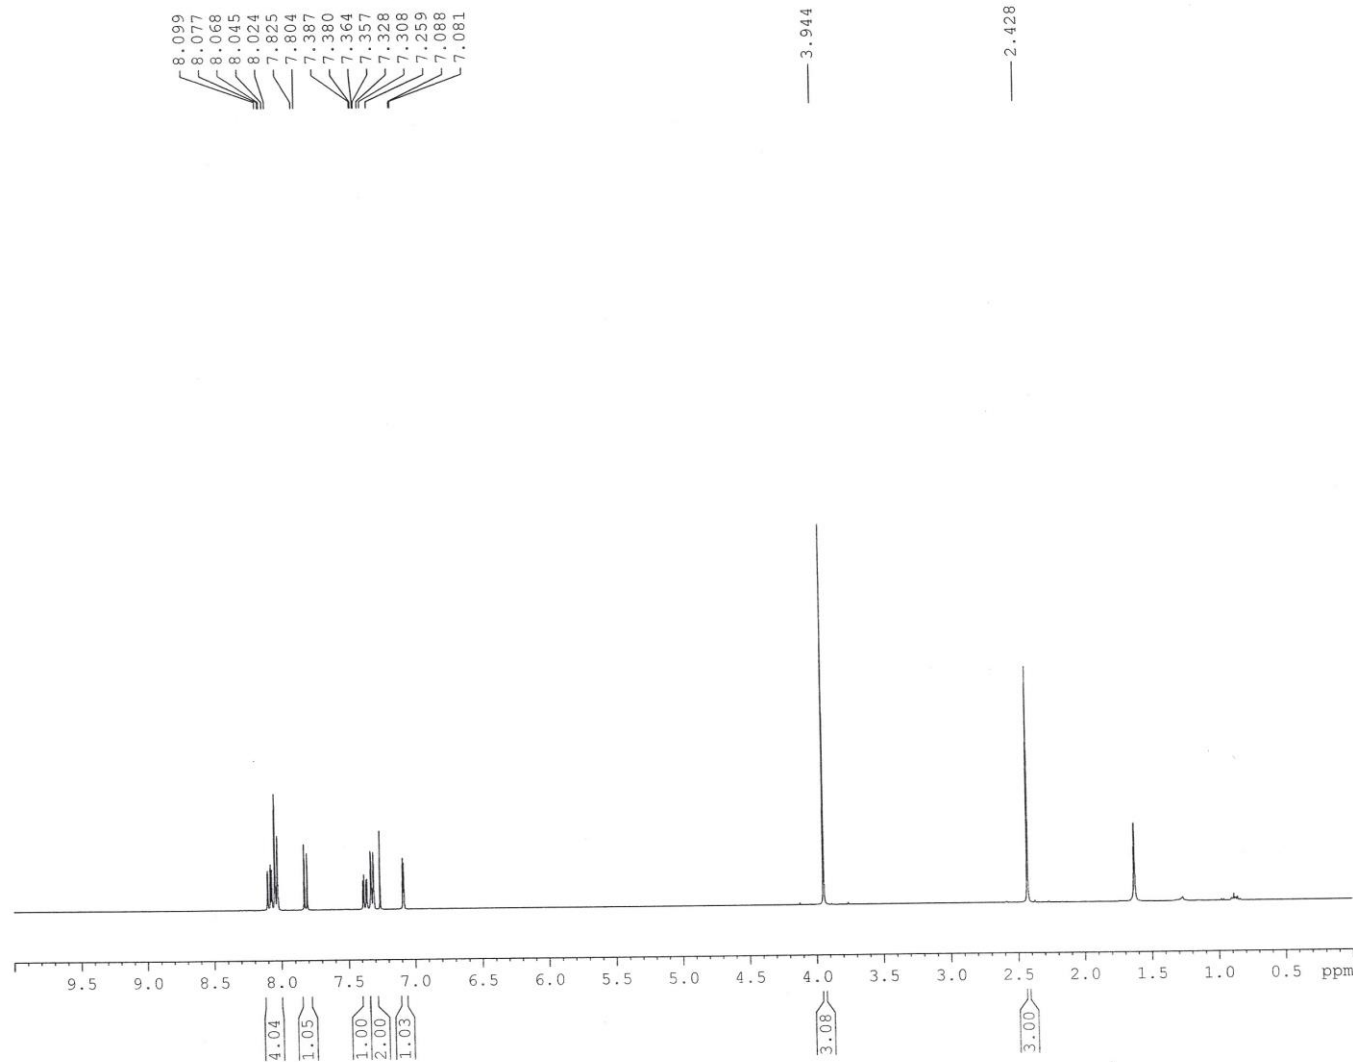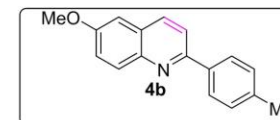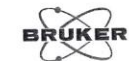

Current Data Parameters  
NAME Dr. A MAJEE 2018  
EXPNO 392  
PROCNO 1

F2 - Acquisition Parameters  
Date\_ 20180513  
Time\_ 19.11  
INSTRUM spect  
PROBHD 5 mm PABBO BB/  
PULPROG zg30  
TD 32768  
SOLVENT CDCl3  
NS 16  
DS 1  
SWH 8223.685 Hz  
FIDRES 0.250967 Hz  
AQ 1.9922944 sec  
RG 135.7  
DW 60.800 usec  
DE 6.50 usec  
TE 300.2 K  
D1 1.00000000 sec  
TD0 1

===== CHANNEL f1 =====  
SF01 400.1524711 MHz  
NUC1 1H  
P1 14.75 usec  
PLW1 12.00000000 W

F2 - Processing parameters  
SI 16384  
SF 400.1500097 MHz  
WDW EM  
SSB 0  
LB 0.30 Hz  
GB 0  
PC 1.00

13C of VBSSM 423/2

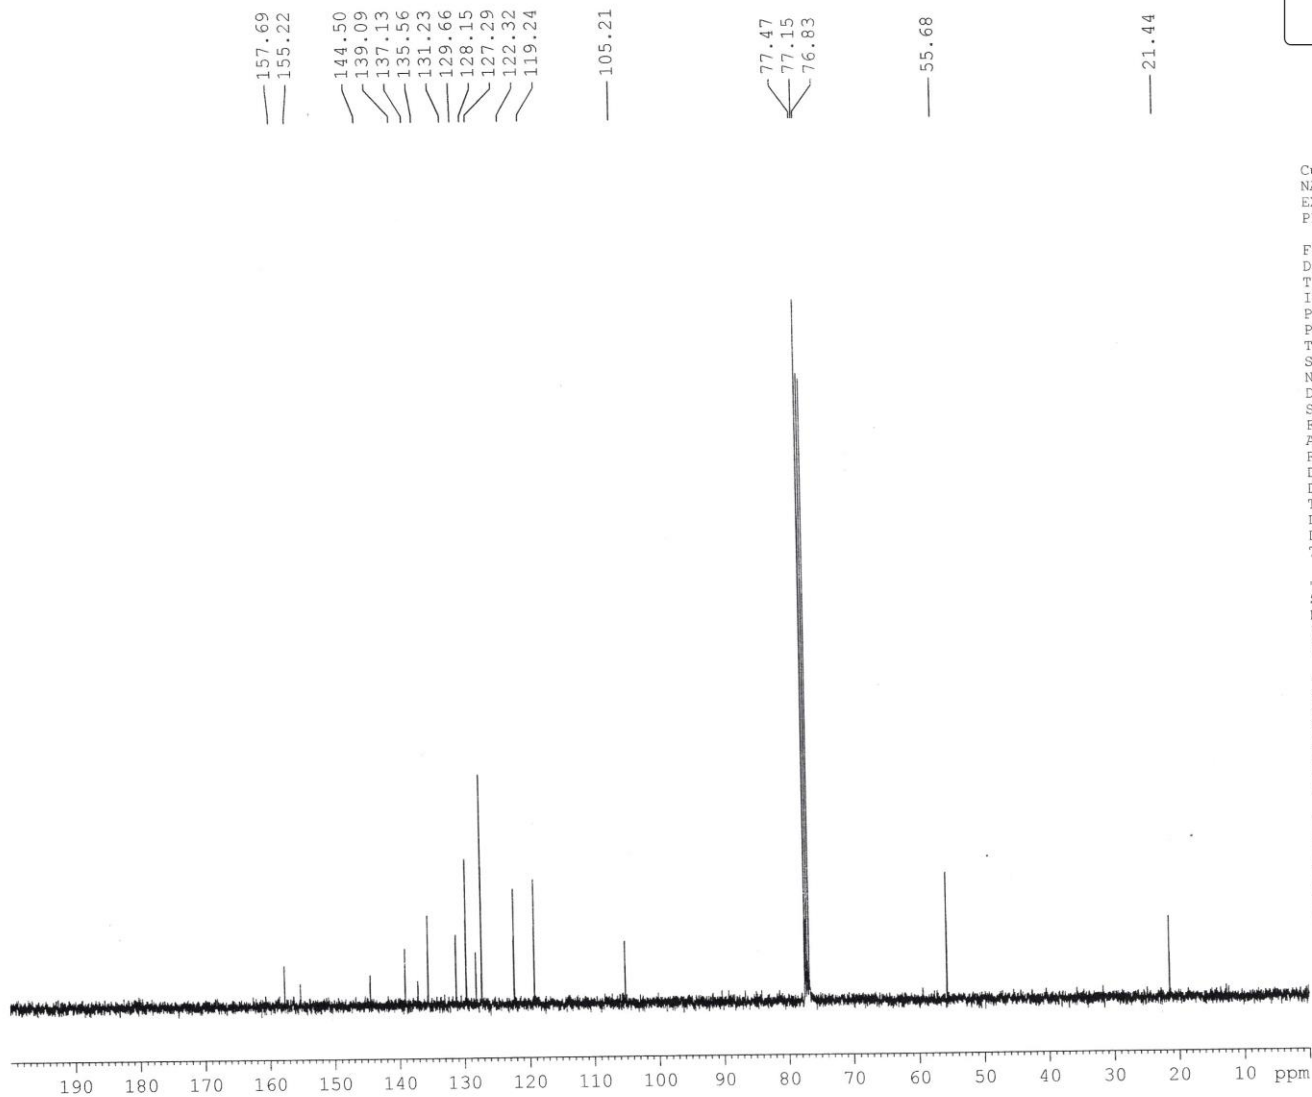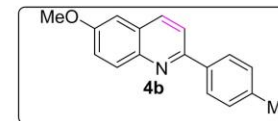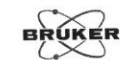

Current Data Parameters  
NAME Dr. A MAJEE 2018  
EXPNO 393  
PROCNO 1

F2 - Acquisition Parameters  
Date\_ 20180513  
Time 19.27  
INSTRUM spect  
PROBHD 5 mm PABBO BB/  
PULPROG zgpg30  
TD 32768  
SOLVENT CDCl3  
NS 320  
DS 2  
SWH 24038.461 Hz  
FIDRES 0.733596 Hz  
AQ 0.6815744 sec  
RG 186.42  
DW 20.800 usec  
DE 6.50 usec  
TE 300.9 K  
D1 2.0000000 sec  
D11 0.0300000 sec  
TD0 1

===== CHANNEL f1 =====  
SFO1 100.6278588 MHz  
NUC1 13C  
P1 8.90 usec  
PLW1 54.0000000 W

===== CHANNEL f2 =====  
SFO2 400.1516006 MHz  
NUC2 1H  
CPDPRG[2] waltz16  
PCPD2 90.00 usec  
PLW2 12.0000000 W  
PLW12 0.32231000 W  
PLW13 0.16212000 W

F2 - Processing parameters  
SI 16384  
SF 100.6177837 MHz  
WDW EM  
SSB 0  
LB 1.00 Hz  
GB 0  
PC 1.40

<sup>1</sup>H of VBSSM 423/36

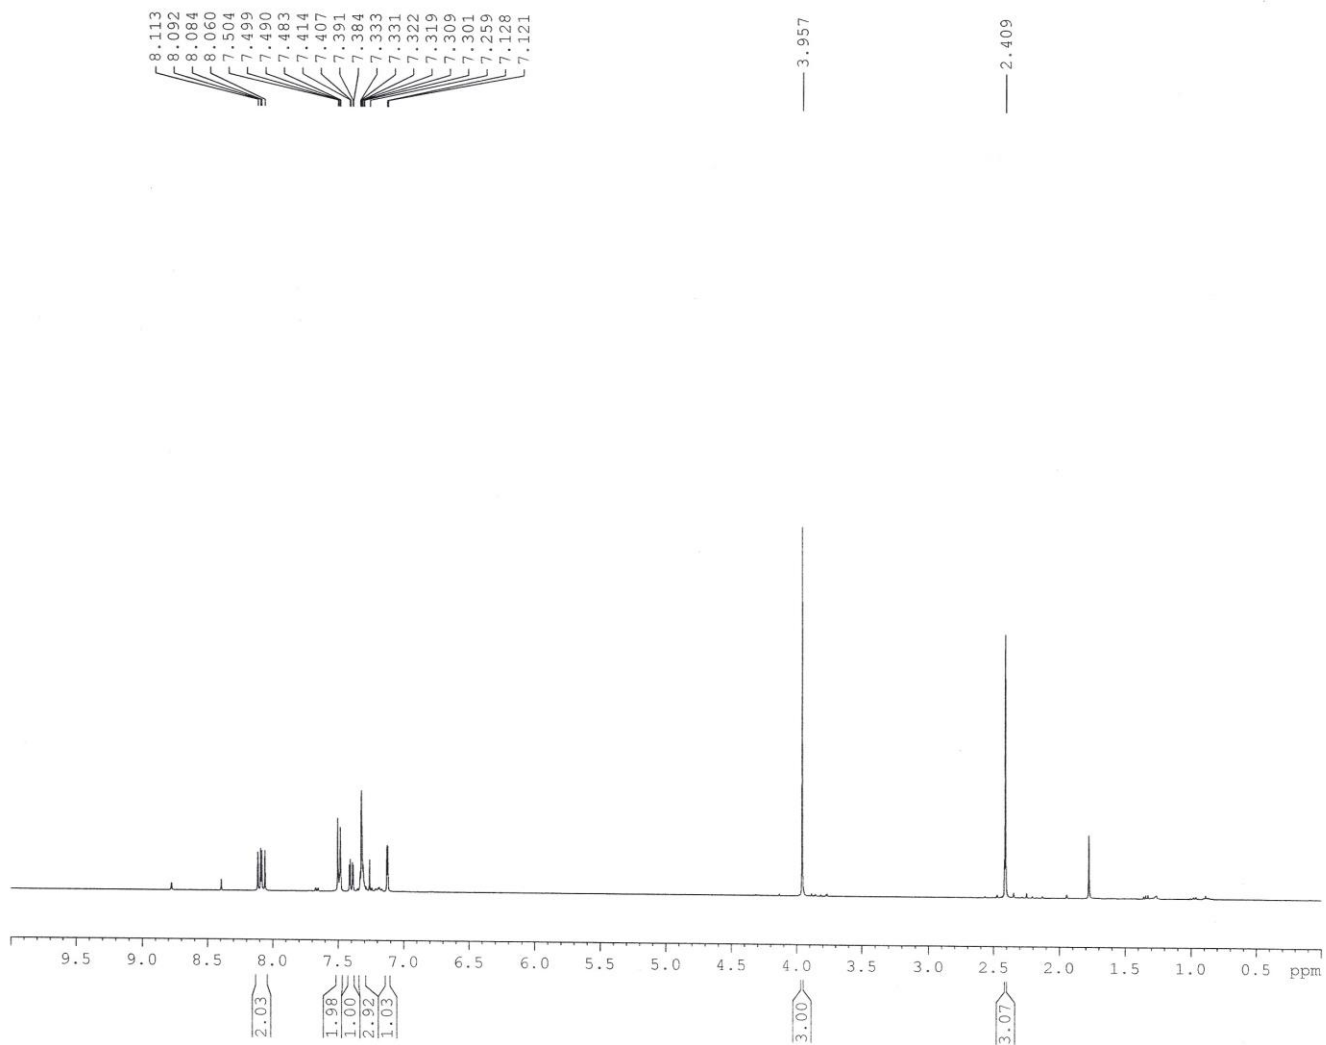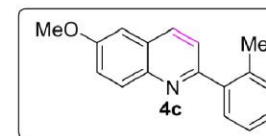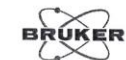

Current Data Parameters  
NAME Dr. A MAJEE 2018  
EXPNO 739  
PROCNO 1

F2 - Acquisition Parameters  
Date\_ 20180912  
Time 21.13  
INSTRUM spect  
PROBHD 5 mm PABBO BB/  
PULPROG zg30  
TD 32768  
SOLVENT CDC13  
NS 20  
DS 1  
SWH 8223.685 Hz  
FIDRES 0.250967 Hz  
AQ 1.9922944 sec  
RG 106.66  
DW 60.800 usec  
DE 6.50 usec  
TE 298.1 K  
D1 1.00000000 sec  
TD0 1

===== CHANNEL f1 =====  
SF01 400.1524711 MHz  
NUC1 1H  
P1 14.75 usec  
PLW1 12.00000000 W

F2 - Processing parameters  
SI 16384  
SF 400.1500097 MHz  
WDW EM  
SSB 0  
LB 0.30 Hz  
GB 0  
PC 1.00

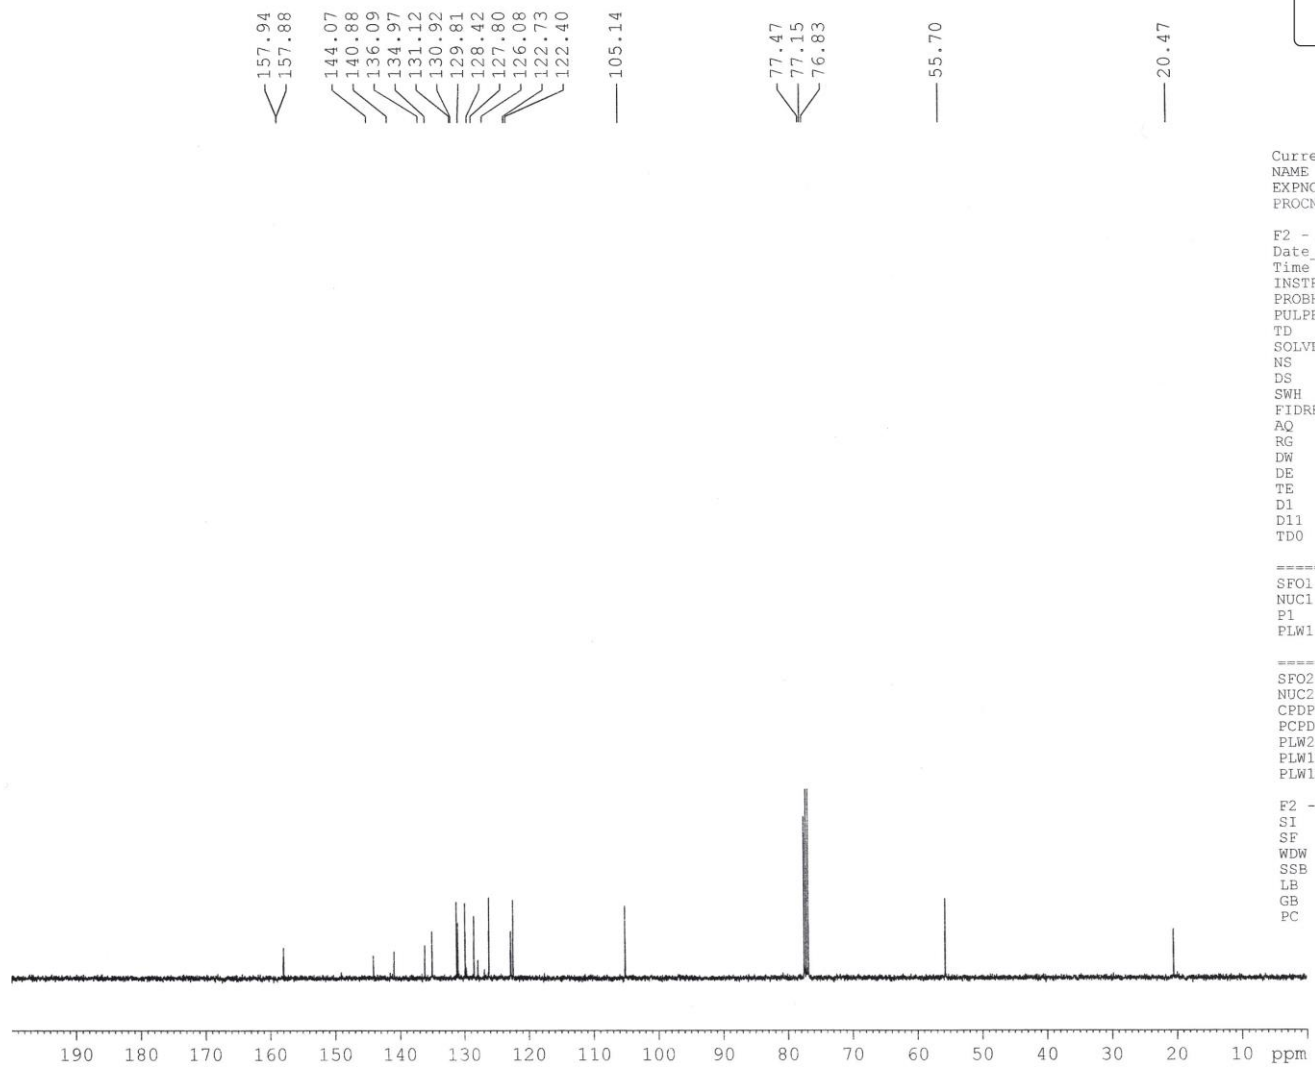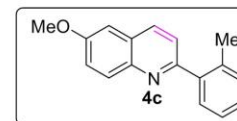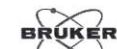

Current Data Parameters  
 NAME Dr. A MAJEE 2018  
 EXPNO 740  
 PROCNO 1

F2 - Acquisition Parameters  
 Date\_ 20180912  
 Time 21.20  
 INSTRUM spect  
 PROBHD 5 mm PABBO BB/  
 PULPROG zgpg30  
 TD 32768  
 SOLVENT CDCl3  
 NS 280  
 DS 2  
 SWH 24038.461 Hz  
 FIDRES 0.733596 Hz  
 AQ 0.6815744 sec  
 RG 186.42  
 DW 20.800 usec  
 DE 6.50 usec  
 TE 298.5 K  
 D1 2.00000000 sec  
 D11 0.03000000 sec  
 TD0 1

===== CHANNEL f1 =====  
 SFO1 100.6278588 MHz  
 NUC1 13C  
 P1 8.90 usec  
 PLW1 54.00000000 W

===== CHANNEL f2 =====  
 SFO2 400.1516006 MHz  
 NUC2 1H  
 CPDPRG[2] waltz16  
 PCPD2 90.00 usec  
 PLW2 12.00000000 W  
 PLW12 0.32231000 W  
 PLW13 0.16212000 W

F2 - Processing parameters  
 SI 16384  
 SF 100.6177871 MHz  
 WDW EM  
 SSB 0  
 LB 1.00 Hz  
 GB 0  
 PC 2.00



1H of VBSSM 423

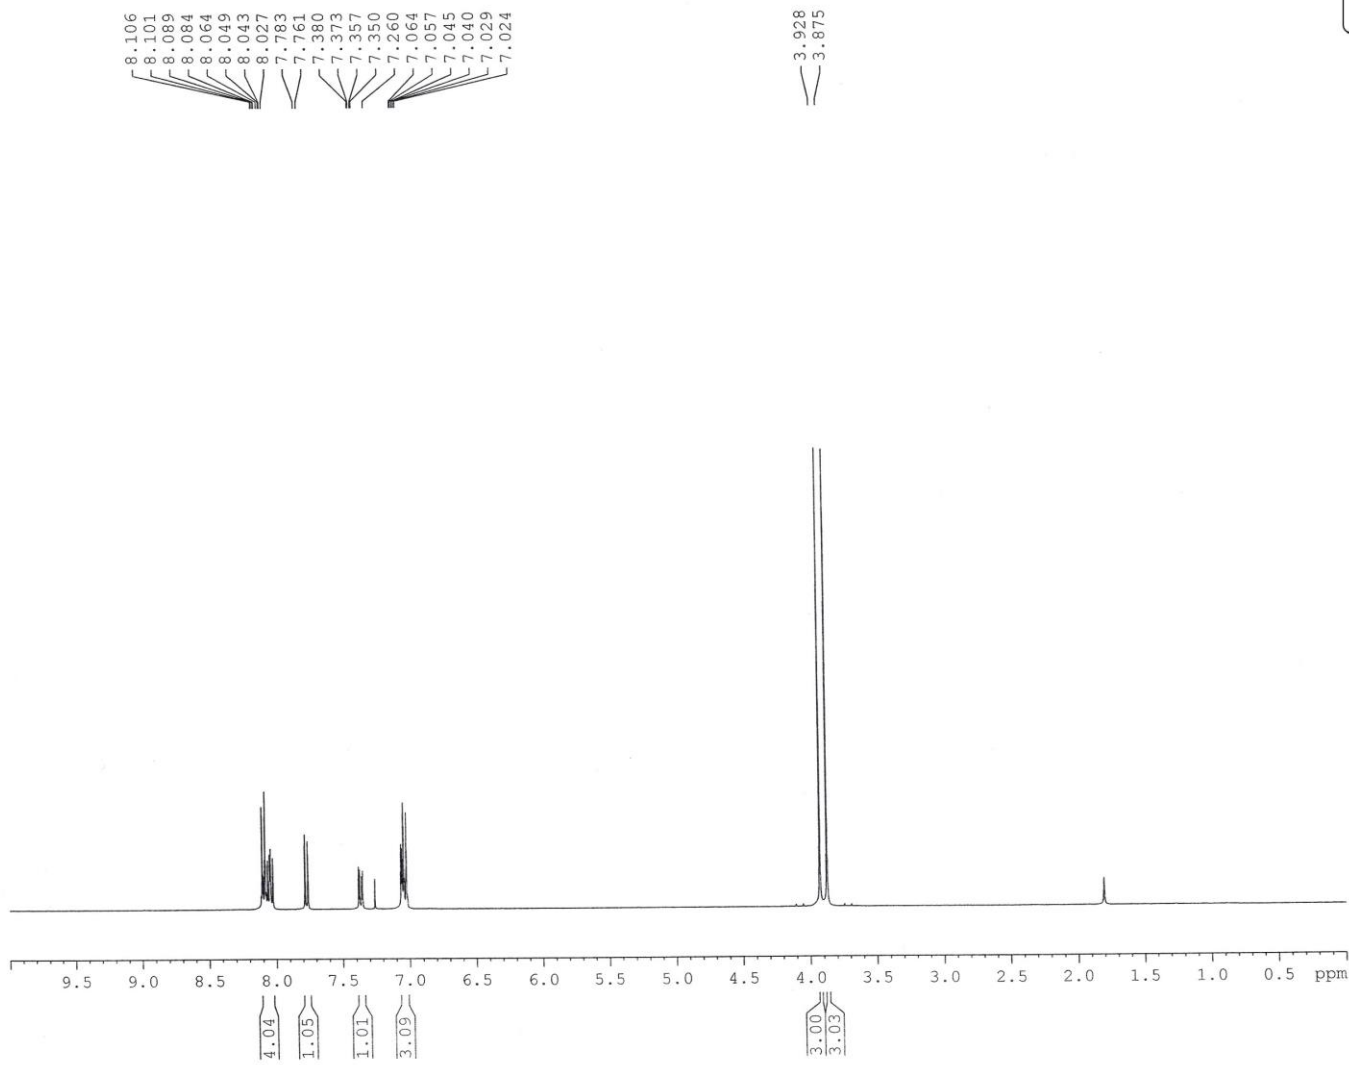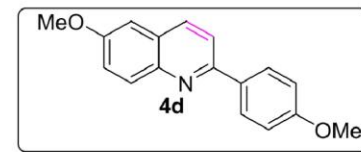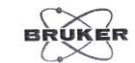

Current Data Parameters  
NAME Dr. A MAJEE 2018  
EXPNO 380  
PROCNO 1

F2 - Acquisition Parameters  
Date\_ 20181218  
Time\_ 15.46  
INSTRUM spect  
PROBHD 5 mm PABBO BB/  
PULPROG zg30  
TD 32768  
SOLVENT CDC13  
NS 16  
DS 1  
SWH 8223.685 Hz  
FIDRES 0.250967 Hz  
AQ 1.9922944 sec  
RG 77.59  
DW 60.800 usec  
DE 6.50 usec  
TE 295.3 K  
D1 1.00000000 sec  
TDO 1

===== CHANNEL f1 =====  
SFO1 400.1524711 MHz  
NUC1 1H  
P1 14.75 usec  
PLW1 12.00000000 W

F2 - Processing parameters  
SI 16384  
SF 400.1500096 MHz  
WDW EM  
SSB 0  
LB 0.30 Hz  
GB 0  
PC 1.00

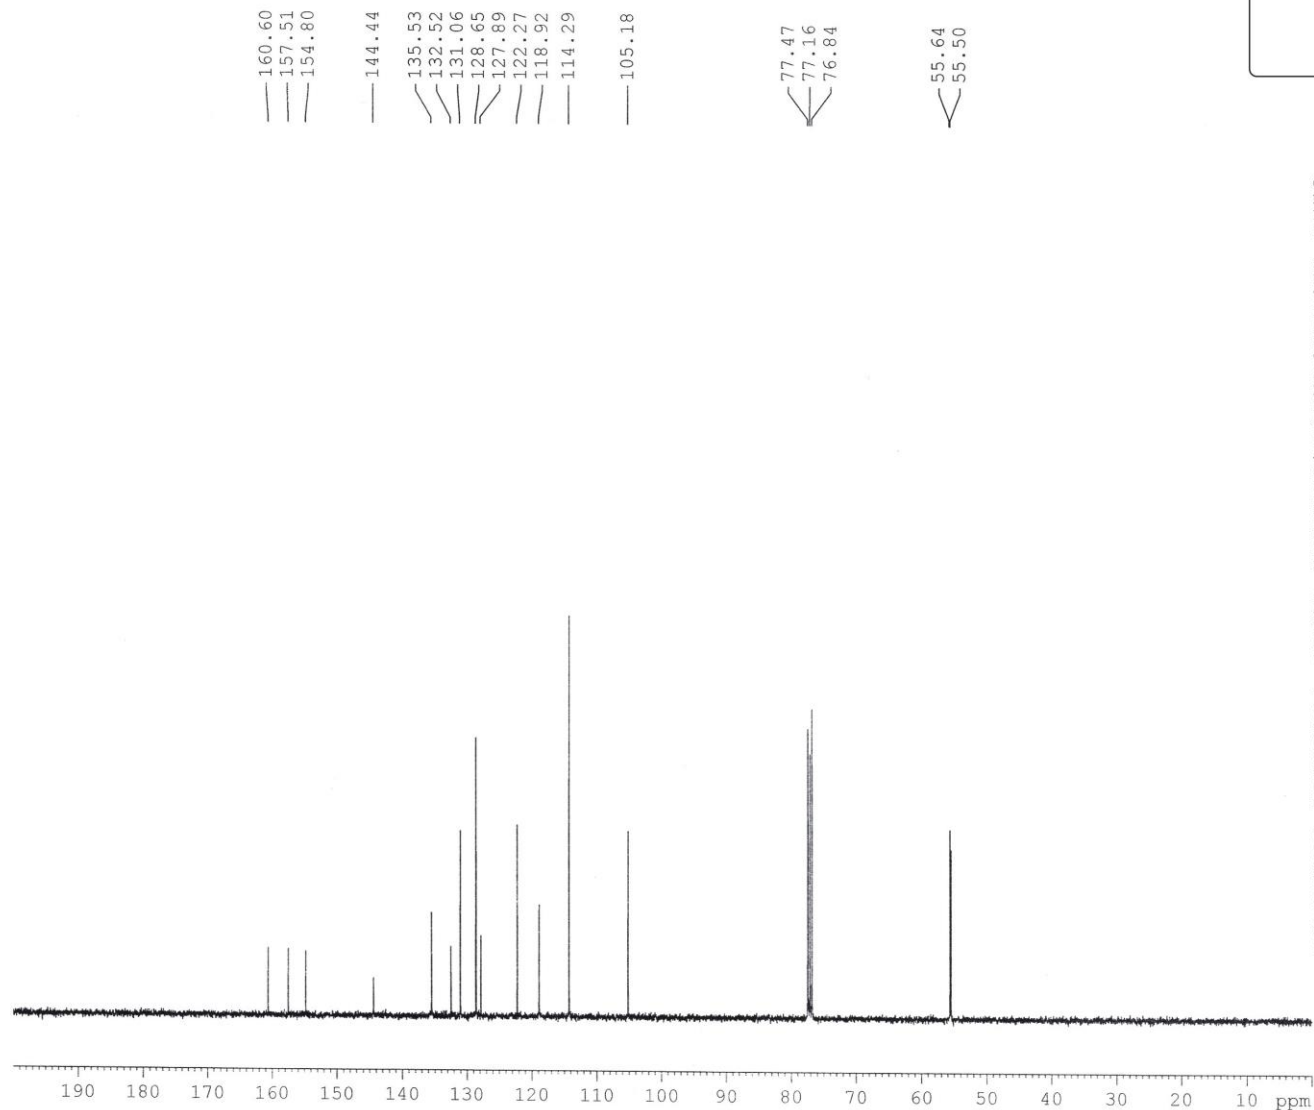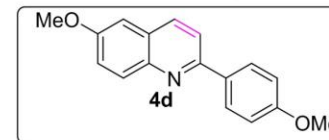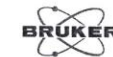

Current Data Parameters  
NAME Dr. A MAJEE 2018  
EXPNO 381  
PROCNO 1

F2 - Acquisition Parameters  
Date\_ 20181218  
Time 15.58  
INSTRUM spect  
PROBHD 5 mm PABBO BB/  
PULPROG zgpg30  
TD 32768  
SOLVENT CDC13  
NS 220  
DS 2  
SWH 24038.461 Hz  
FIDRES 0.733596 Hz  
AQ 0.6815744 sec  
RG 186.42  
DW 20.800 usec  
DE 6.50 usec  
TE 295.8 K  
D1 2.00000000 sec  
D11 0.03000000 sec  
TDO 1

===== CHANNEL f1 =====  
SFO1 100.6278588 MHz  
NUC1 13C  
P1 8.90 usec  
PLW1 54.00000000 W

===== CHANNEL f2 =====  
SFO2 400.1516006 MHz  
NUC2 1H  
CPDPRG[2] waltz16  
PCPD2 90.00 usec  
PLW2 12.00000000 W  
PLW12 0.32231000 W  
PLW13 0.16212000 W

F2 - Processing parameters  
SI 16384  
SF 100.6177876 MHz  
WDW EM  
SSB 0  
LB 1.00 Hz  
GB 0  
PC 1.40

<sup>1</sup>H of VBSSM 423/18

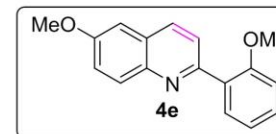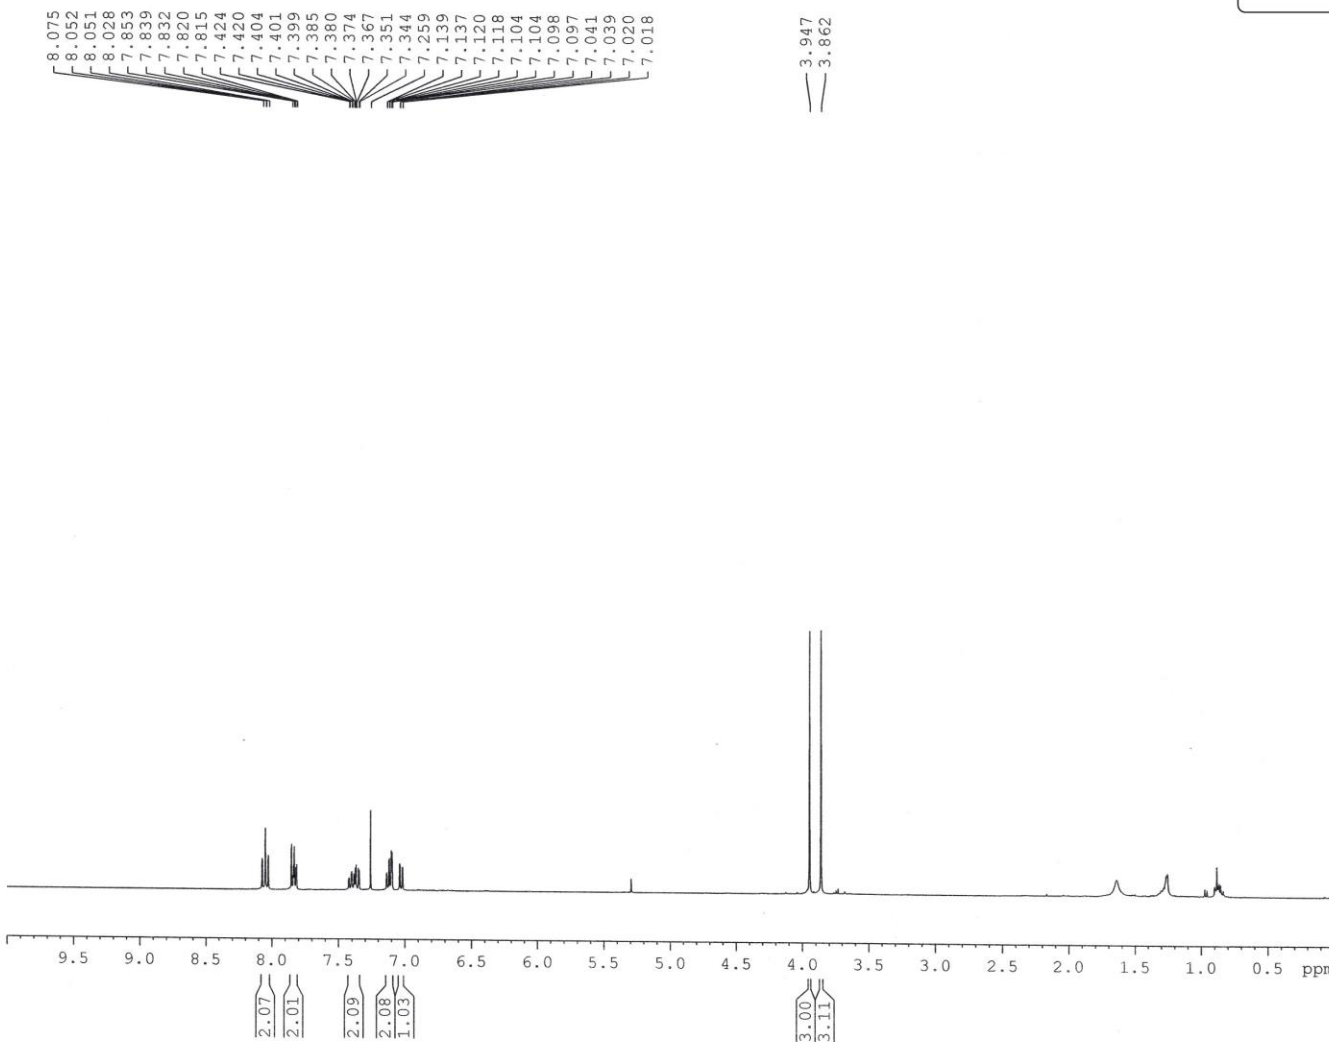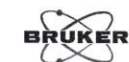

Current Data Parameters  
NAME Dr. A MAJEE 2018  
EXPNO 750  
PROCNO 1

F2 - Acquisition Parameters  
Date\_ 20180917  
Time\_ 19.26  
INSTRUM spect  
PROBHD 5 mm PABBO BB/  
PULPROG zg30  
TD 32768  
SOLVENT CDC13  
NS 16  
DS 1  
SWH 8223.685 Hz  
FIDRES 0.250967 Hz  
AQ 1.9922944 sec  
RG 148.91  
DW 60.800 usec  
DE 6.50 usec  
TE 298.7 K  
D1 1.00000000 sec  
TD0 1

===== CHANNEL f1 =====  
SFO1 400.1524711 MHz  
NUC1 1H  
P1 14.75 usec  
PLW1 12.00000000 W

F2 - Processing parameters  
SI 16384  
SF 400.1500097 MHz  
WDW EM  
SSB 0  
LB 0.30 Hz  
GB 0  
PC 1.00

157.75  
157.27  
154.76  
144.52  
134.08  
131.50  
131.19  
130.15  
128.09  
123.80  
121.94  
121.38  
111.57  
105.14

77.46  
77.15  
76.83

55.79  
55.68  
53.55

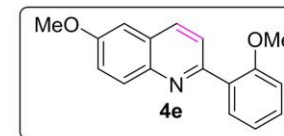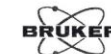

Current Data Parameters  
NAME Dr. A MAJEE 2018  
EXPNO 751  
PROCNO 1

F2 - Acquisition Parameters  
Date\_ 20180921  
Time 15.44  
INSTRUM spect  
PROBHD 5 mm PABBO BB/  
PULPROG zgpg30  
TD 32768  
SOLVENT CDCl3  
NS 800  
DS 2  
SWH 24038.461 Hz  
FIDRES 0.733596 Hz  
AQ 0.6815744 sec  
RG 186.42  
DW 20.800 usec  
DE 6.50 usec  
TE 297.7 K  
D1 2.0000000 sec  
D11 0.03000000 sec  
TD0 1

===== CHANNEL f1 =====  
SFO1 100.6278588 MHz  
NUC1 13C  
P1 8.90 usec  
PLW1 54.00000000 W

===== CHANNEL f2 =====  
SFO2 400.1516006 MHz  
NUC2 1H  
CPDPRG[2] waltz16  
PCPD2 90.00 usec  
PLW2 12.00000000 W  
PLW12 0.32231000 W  
PLW13 0.16212000 W

F2 - Processing parameters  
SI 16384  
SF 100.6177855 MHz  
WDW EM  
SSB 0  
LB 1.00 Hz  
GB 0  
PC 2.00

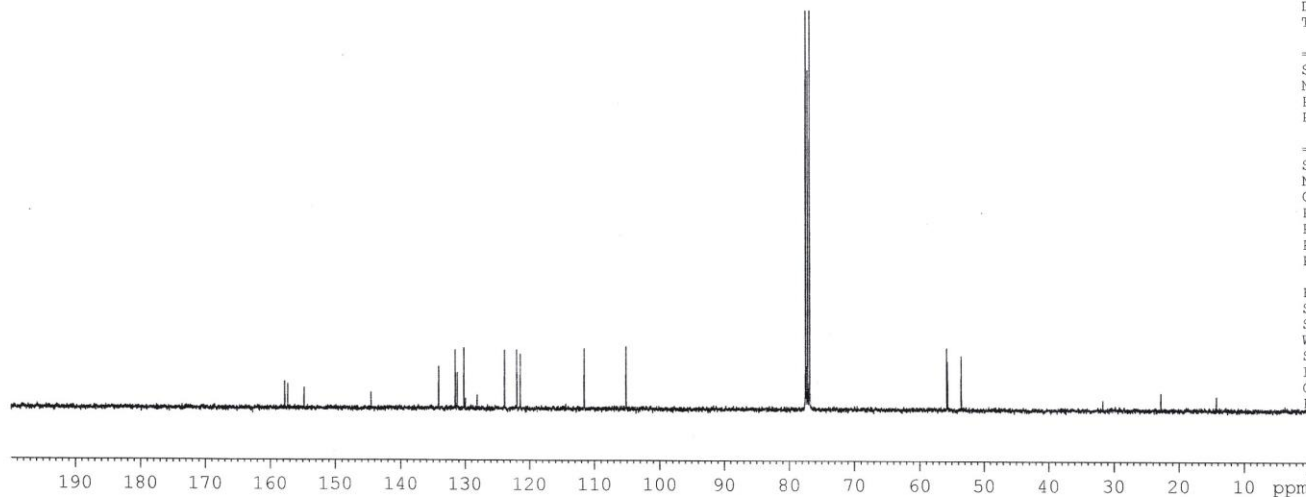

1H of VBSSM 423/6

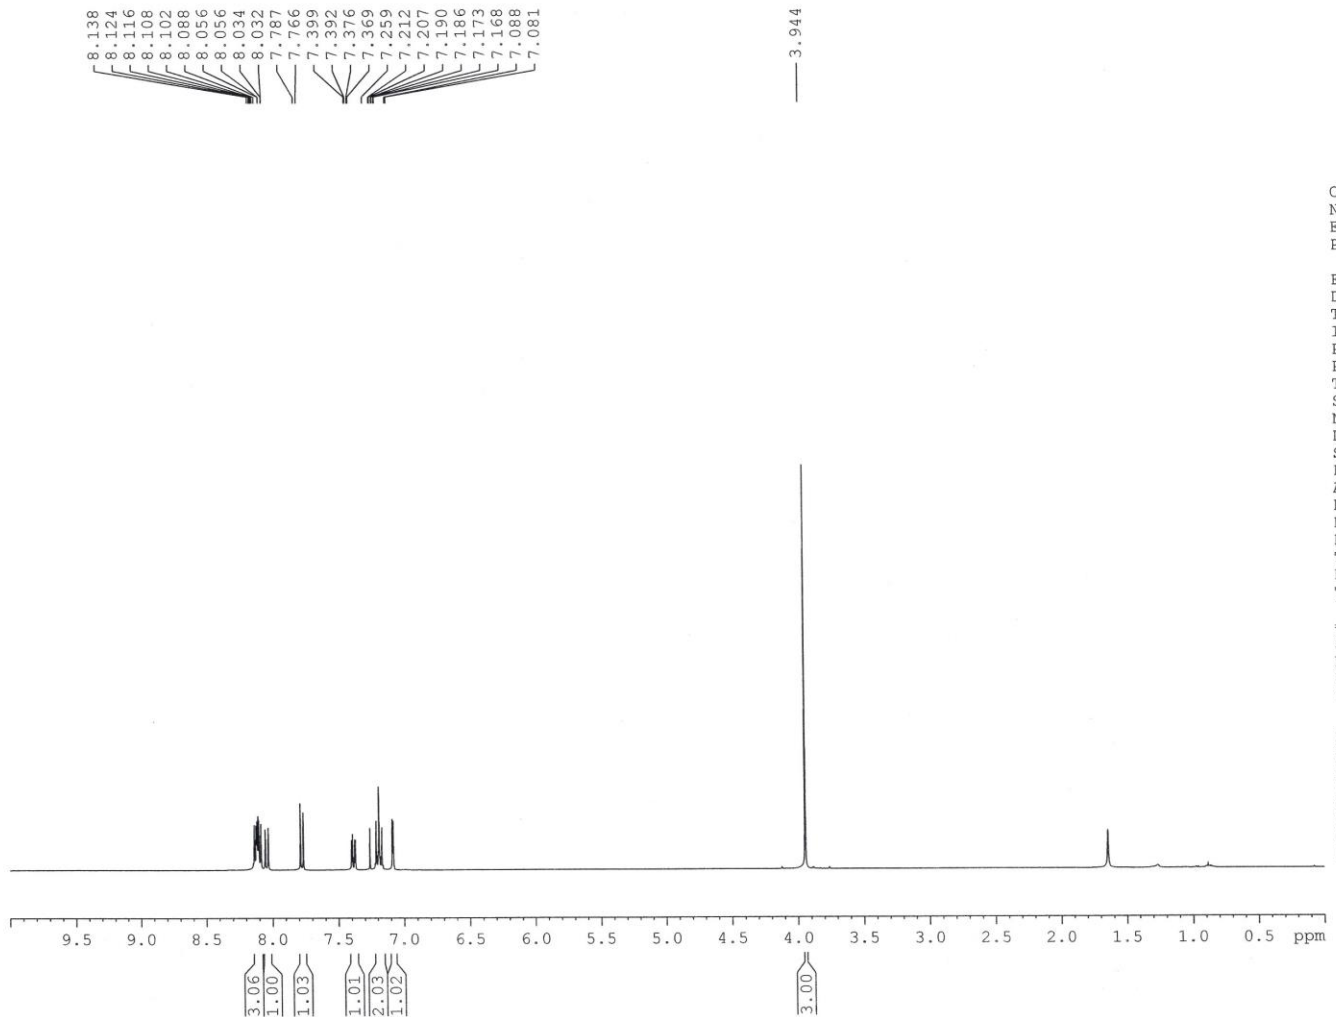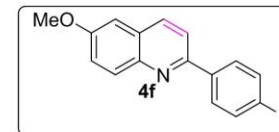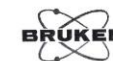

Current Data Parameters  
NAME Dr. A MAJEE 2018  
EXPNO 554  
PROCNO 1

F2 - Acquisition Parameters  
Date\_ 20180707  
Time 19.29  
INSTRUM spect  
PROBHD 5 mm PABBO BB/  
PULPROG zg30  
TD 32768  
SOLVENT CDCl3  
NS 12  
DS 1  
SWH 8223.685 Hz  
FIDRES 0.250967 Hz  
AQ 1.9922944 sec  
RG 120.16  
DW 60.800 usec  
DE 6.50 usec  
TE 301.2 K  
D1 1.00000000 sec  
TD0 1

==== CHANNEL f1 =====  
SFO1 400.1524711 MHz  
NUC1 1H  
P1 14.75 usec  
PLW1 12.00000000 W

F2 - Processing parameters  
SI 16384  
SF 400.1500097 MHz  
WDW EM  
SSB 0  
LB 0.30 Hz  
GB 0  
PC 1.00

164.95  
162.48  
157.88  
154.10  
144.46  
136.10  
136.07  
135.75  
131.23  
129.24  
129.16  
128.18  
122.58  
118.99  
115.93  
115.71  
105.17

77.47  
77.15  
76.83

55.69

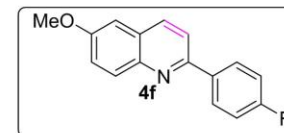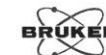

Current Data Parameters  
NAME Dr. A MAJEE 2018  
EXPNO 555  
PROCNO 1

F2 - Acquisition Parameters  
Date\_ 20180707  
Time\_ 20.05  
INSTRUM spect  
PROBHD 5 mm PABBO BB/  
PULPROG zgpg30  
TD 32768  
SOLVENT CDCl3  
NS 640  
DS 2  
SWH 24038.461 Hz  
FIDRES 0.733596 Hz  
AQ 0.6815744 sec  
RG 77.59  
DW 20.800 usec  
DE 6.50 usec  
TE 301.9 K  
D1 2.0000000 sec  
D11 0.0300000 sec  
TDO 1

===== CHANNEL f1 =====  
SFO1 100.6278588 MHz  
NUC1 13C  
P1 8.90 usec  
PLW1 54.0000000 W

===== CHANNEL f2 =====  
SFO2 400.1516006 MHz  
NUC2 1H  
CPDPRG[2] waltz16  
PCPD2 90.00 usec  
PLW2 12.0000000 W  
PLW12 0.32231000 W  
PLW13 0.16212000 W

F2 - Processing parameters  
SI 16384  
SF 100.6177838 MHz  
WDW EM  
SSB 0  
LB 1.00 Hz  
GB 0  
PC 2.00

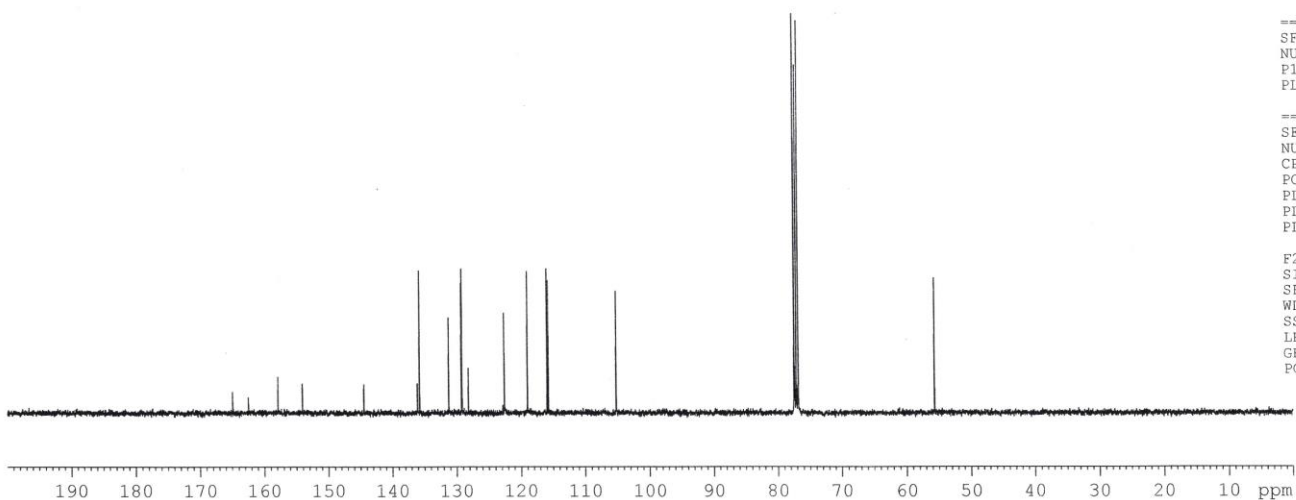

1H of VBSSM 423/11

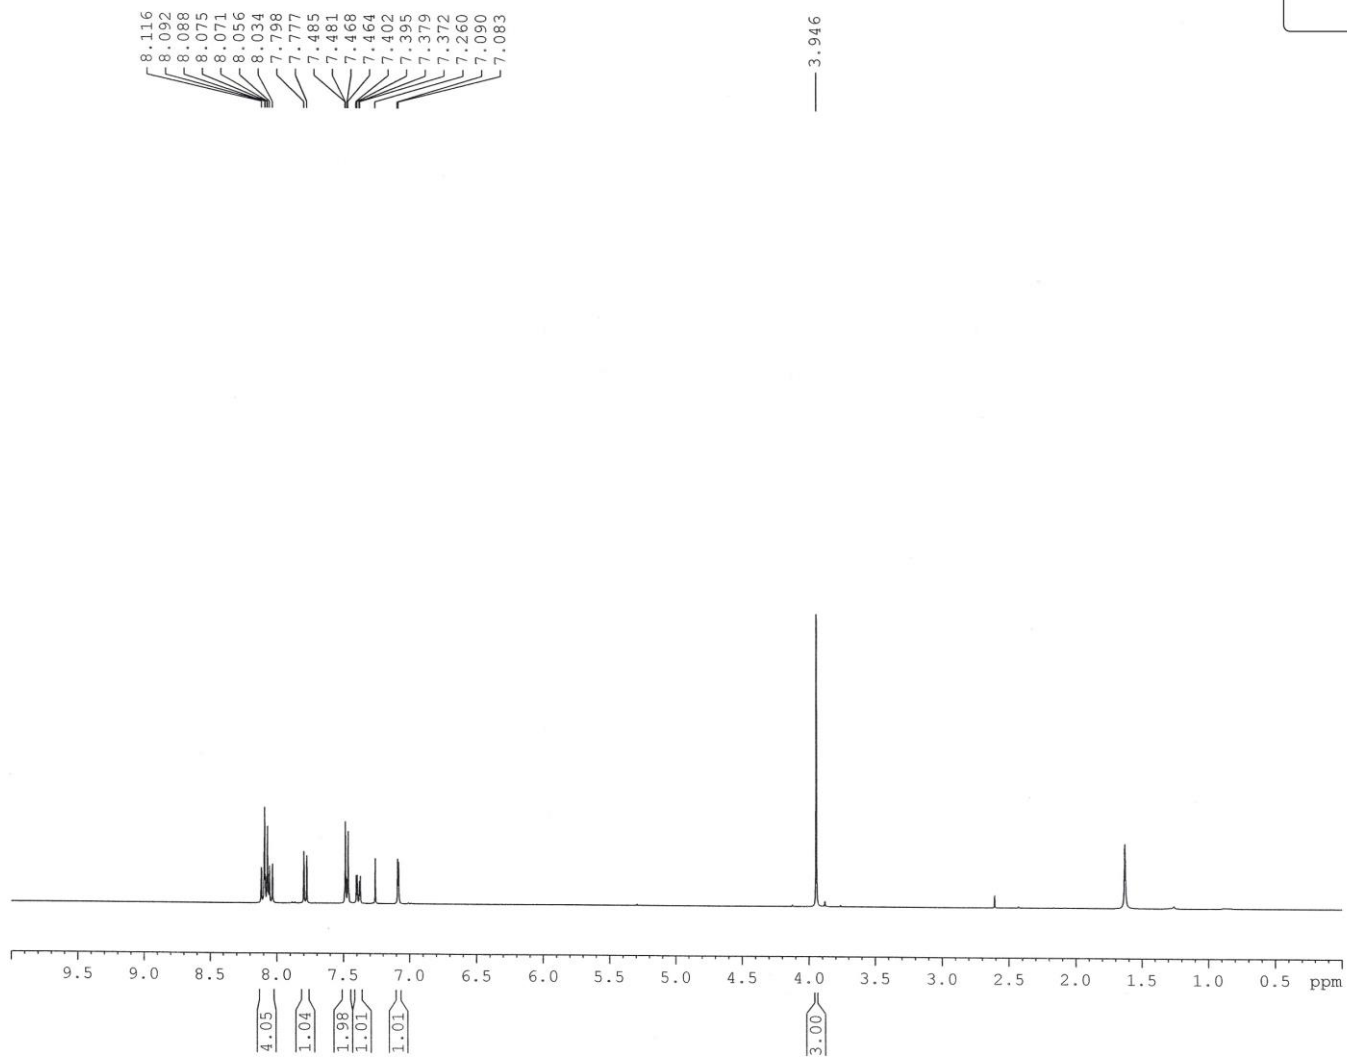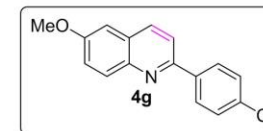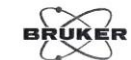

Current Data Parameters  
NAME Dr. A MAJEE 2018  
EXPNO 529  
PROCNO 1

F2 - Acquisition Parameters  
Date\_ 20180628  
Time 20.48  
INSTRUM spect  
PROBHD 5 mm PABBO BB/  
PULPROG zg30  
TD 32768  
SOLVENT CDCl3  
NS 16  
DS 1  
SWH 8223.685 Hz  
FIDRES 0.250967 Hz  
AQ 1.9922944 sec  
RG 186.42  
DW 60.800 usec  
DE 6.50 usec  
TE 301.0 K  
D1 1.00000000 sec  
TD0 1

===== CHANNEL f1 =====  
SF01 400.1524711 MHz  
NUC1 1H  
P1 14.75 usec  
PLW1 12.00000000 W

F2 - Processing parameters  
SI 16384  
SF 400.1500096 MHz  
WDW EM  
SSB 0  
LB 0.30 Hz  
GB 0  
PC 1.00





1H of VBSSM 423/3

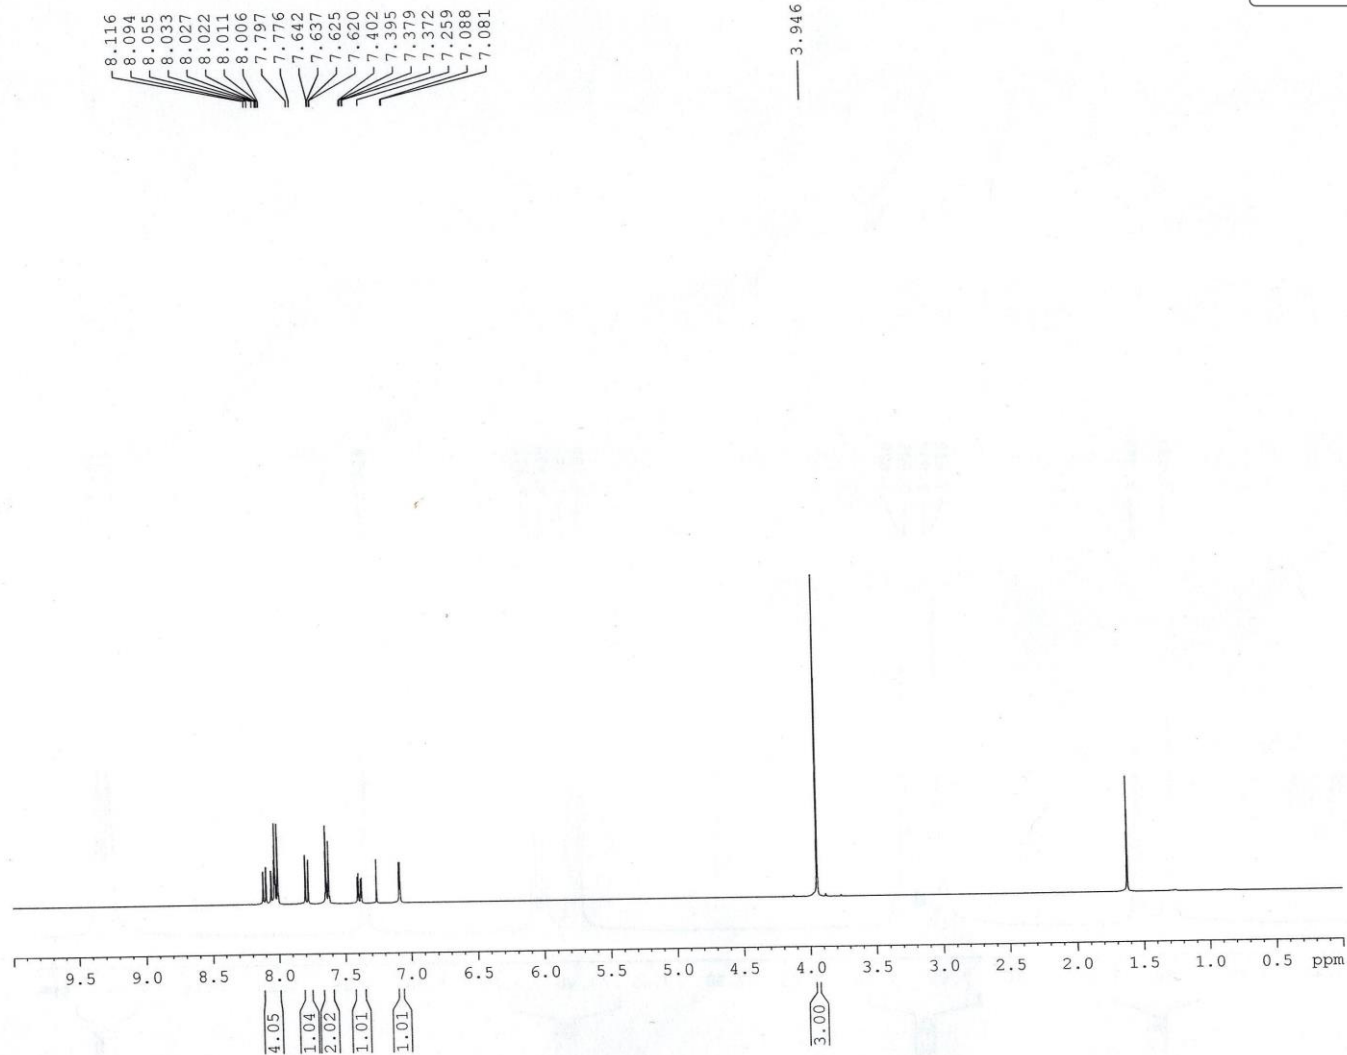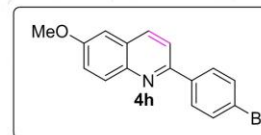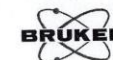

Current Data Parameters  
NAME Dr. A MAJEE 2018  
EXPNO 401  
PROCNO 1

F2 - Acquisition Parameters  
Date\_ 20180517  
Time 9.53  
INSTRUM spect  
PROBHD 5 mm PABBO BB/  
PULPROG zg30  
TD 32768  
SOLVENT CDC13  
NS 16  
DS 1  
SWH 8223.685 Hz  
FIDRES 0.250967 Hz  
AQ 1.9922944 sec  
RG 135.7  
DW 60.800 usec  
DE 6.50 usec  
TE 298.9 K  
D1 1.00000000 sec  
TD0 1

===== CHANNEL f1 =====  
SFO1 400.1524711 MHz  
NUC1 1H  
P1 14.75 usec  
PLW1 12.00000000 W

F2 - Processing parameters  
SI 16384  
SF 400.1500097 MHz  
WDW EM  
SSB 0  
LB 0.30 Hz  
GB 0  
PC 1.00

158.00  
153.86  
144.48  
138.77  
135.80  
132.04  
131.28  
128.94  
128.38  
123.58  
122.71  
118.89  
105.14

77.47  
77.36  
77.15  
76.83

55.71

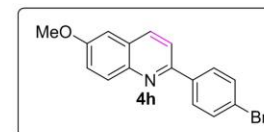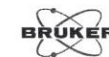

Current Data Parameters  
NAME Dr. A MAJEE 2018  
EXPNO 402  
PROCNO 1

F2 - Acquisition Parameters  
Date\_ 20180517  
Time 10.17  
INSTRUM spect  
PROBHD 5 mm PABBO BB/  
PULPROG zgpg30  
TD 32768  
SOLVENT CDCl3  
NS 480  
DS 2  
SWH 24038.461 Hz  
FIDRES 0.733596 Hz  
AQ 0.6815744 sec  
RG 186.42  
DW 20.800 usec  
DE 6.50 usec  
TE 299.6 K  
D1 2.0000000 sec  
D11 0.03000000 sec  
TD0 1

----- CHANNEL f1 -----  
SFO1 100.6278588 MHz  
NUC1 13C  
P1 8.90 usec  
PLW1 54.00000000 W

----- CHANNEL f2 -----  
SFO2 400.1516006 MHz  
NUC2 1H  
CPDPRG[2] waltz16  
PCPD2 90.00 usec  
PLW2 12.00000000 W  
PLW12 0.32231000 W  
PLW13 0.16212000 W

F2 - Processing parameters  
SI 16384  
SF 100.6177841 MHz  
WDW EM  
SSB 0  
LB 1.00 Hz  
GB 0  
PC 1.40

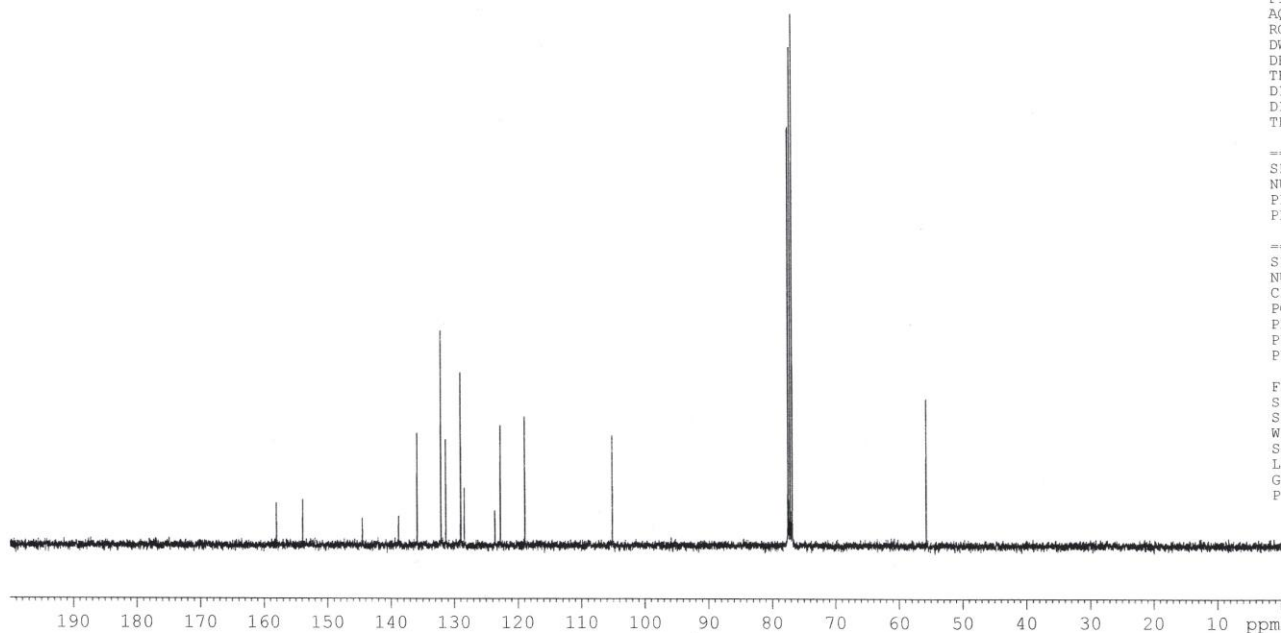

1H of VBSSM 423/13

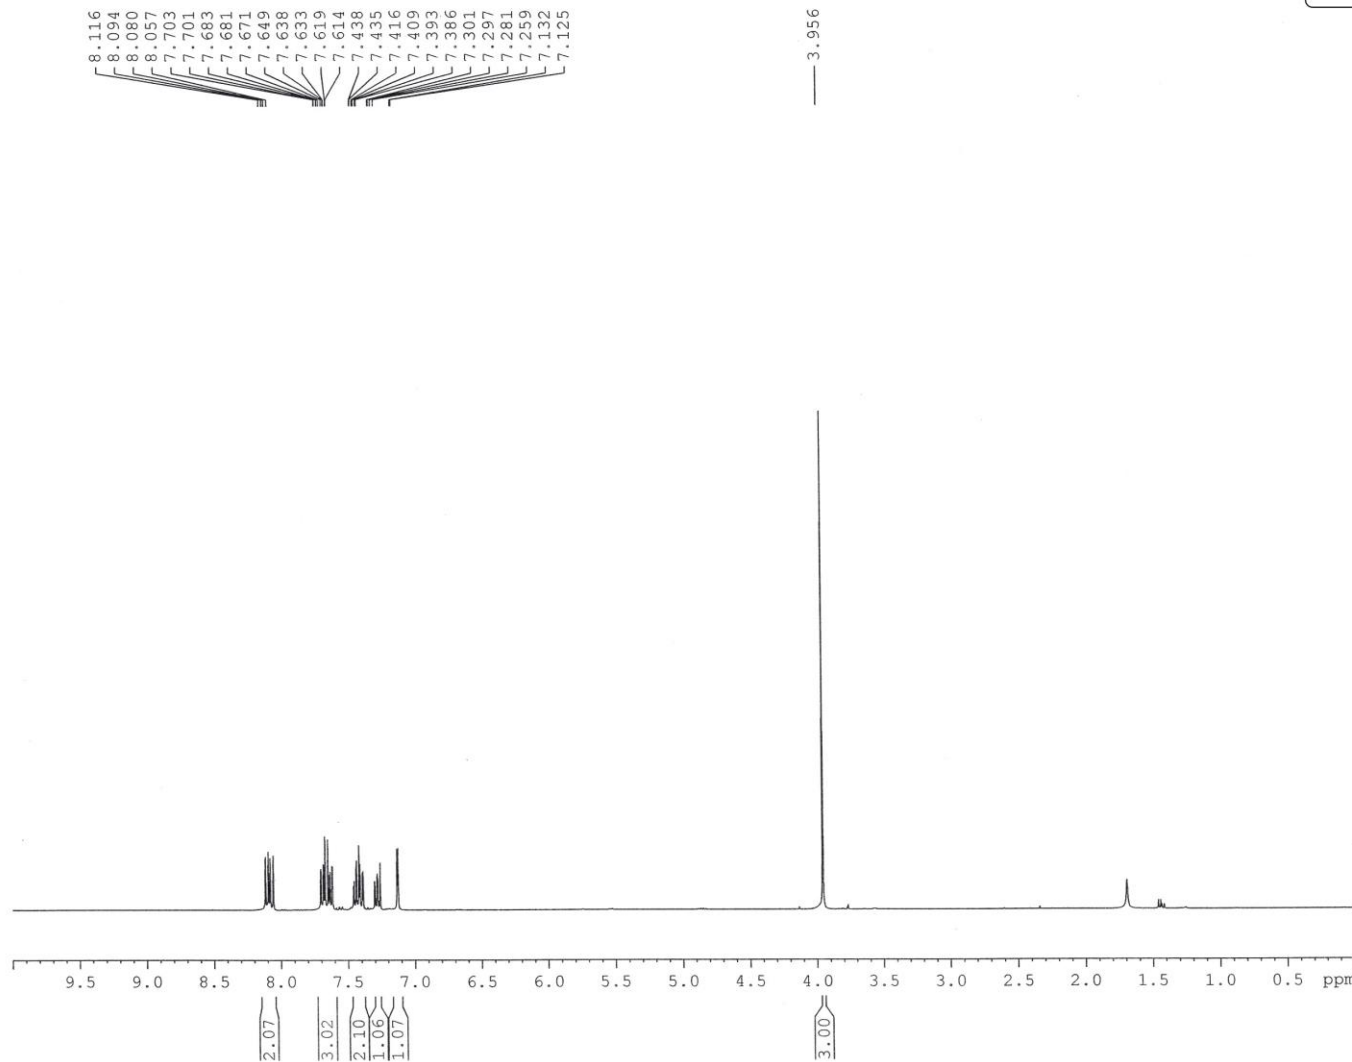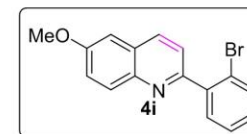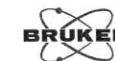

Current Data Parameters  
NAME Dr. A MAJEE 2018  
EXPNO 533  
PROCNO 1

F2 - Acquisition Parameters  
Date\_ 20180630  
Time 11.44  
INSTRUM spect  
PROBHD 5 mm PABBO BB/  
PULPROG zg30  
TD 32768  
SOLVENT CDC13  
NS 20  
DS 1  
SWH 8223.685 Hz  
FIDRES 0.250967 Hz  
AQ 1.9922944 sec  
RG 120.16  
DW 60.800 usec  
DE 6.50 usec  
TE 299.2 K  
D1 1.00000000 sec  
TD0 1

===== CHANNEL f1 =====  
SFO1 400.1524711 MHz  
NUC1 1H  
P1 14.75 usec  
PLW1 12.00000000 W

F2 - Processing parameters  
SI 16384  
SF 400.1500096 MHz  
WDW EM  
SSB 0  
LB 0.30 Hz  
GB 0  
PC 1.00

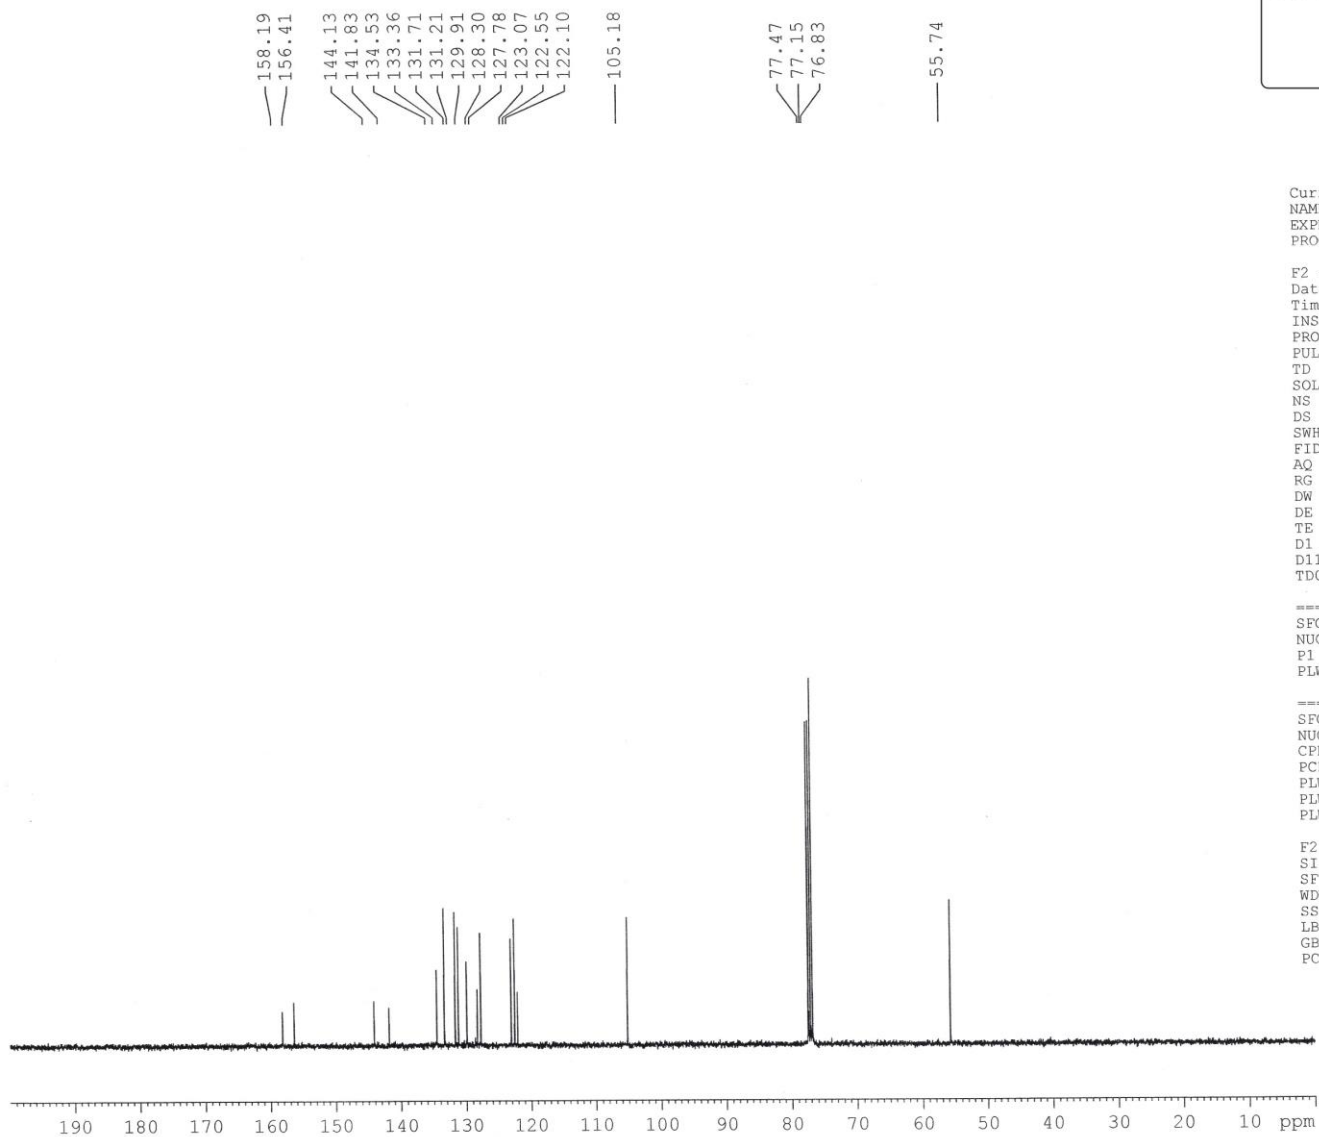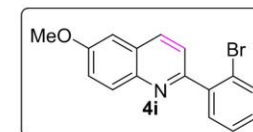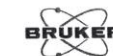

Current Data Parameters  
 NAME Dr. A MAJEE 2018  
 EXPNO 534  
 PROCNO 1

F2 - Acquisition Parameters  
 Date\_ 20180630  
 Time\_ 12.17  
 INSTRUM spect  
 PROBHD 5 mm PABBO BB/  
 PULPROG zgpg30  
 TD 32768  
 SOLVENT CDCl3  
 NS 424  
 DS 2  
 SWH 24038.461 Hz  
 FIDRES 0.733596 Hz  
 AQ 0.6815744 sec  
 RG 186.42  
 DW 20.800 usec  
 DE 6.50 usec  
 TE 299.9 K  
 D1 2.00000000 sec  
 D11 0.03000000 sec  
 TD0 1

===== CHANNEL f1 =====  
 SFO1 100.6278588 MHz  
 NUC1 13C  
 P1 8.90 usec  
 PLW1 54.00000000 W

===== CHANNEL f2 =====  
 SFO2 400.1516006 MHz  
 NUC2 1H  
 CPDPRG[2] waltz16  
 PCPD2 90.00 usec  
 PLW2 12.00000000 W  
 PLW12 0.32231000 W  
 PLW13 0.16212000 W

F2 - Processing parameters  
 SI 16384  
 SF 100.6177854 MHz  
 WDW EM  
 SSB 0  
 LB 1.00 Hz  
 GB 0  
 PC 2.00

1H of VBSSM 423/40

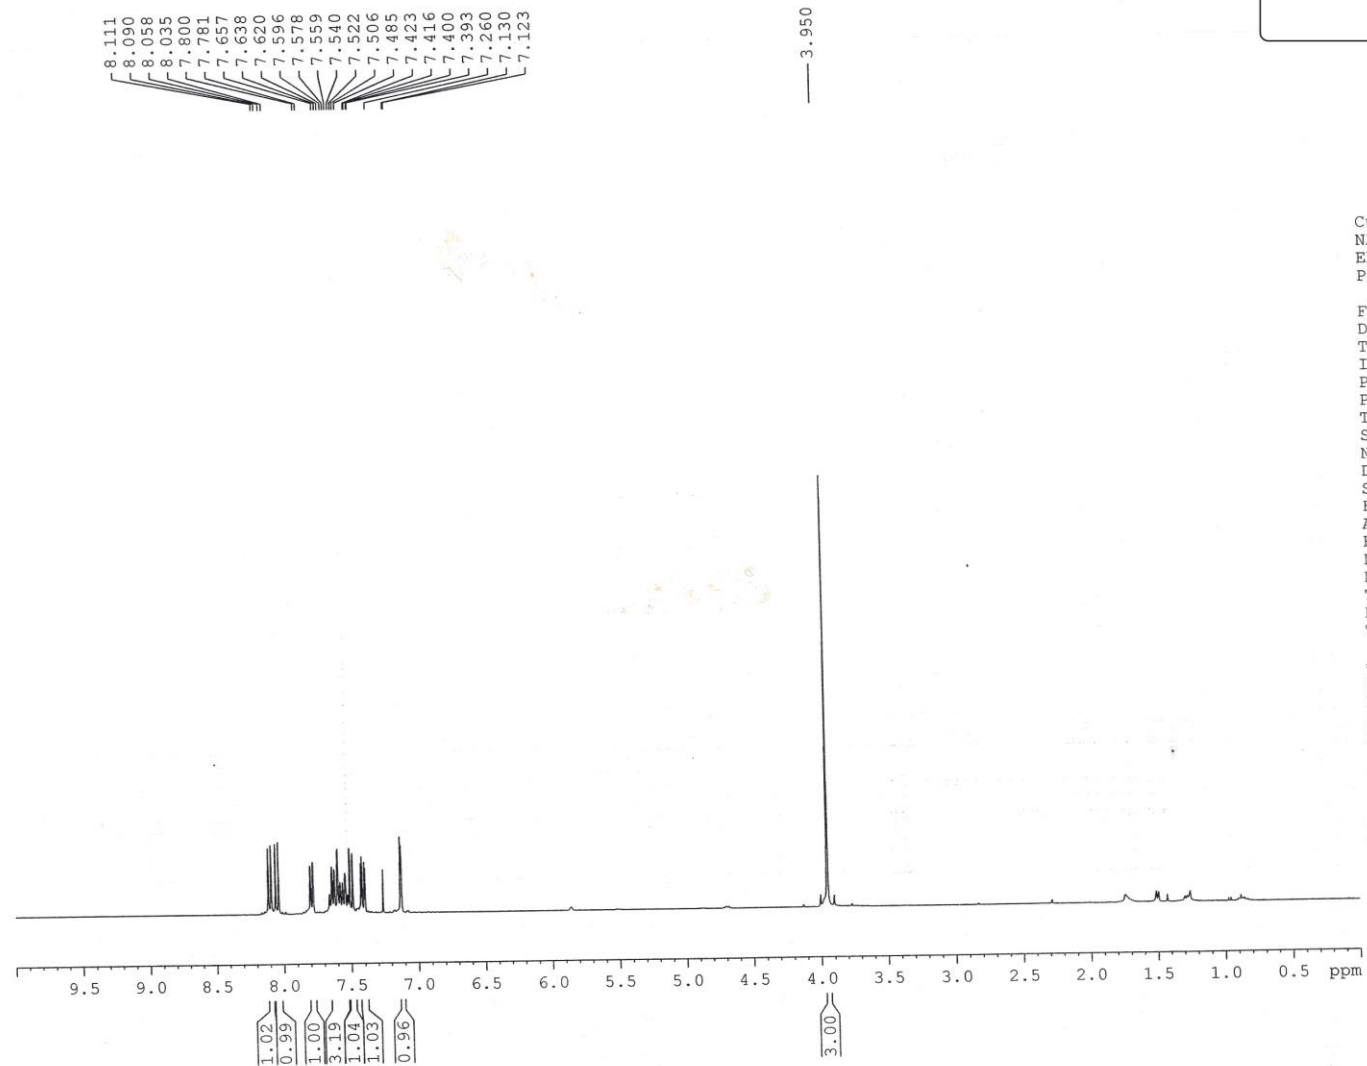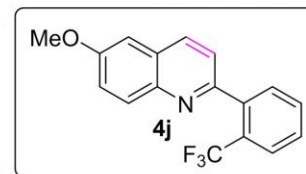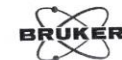

Current Data Parameters  
NAME Dr. A MAJEE 2018  
EXPNO 745  
PROCNO 1

F2 - Acquisition Parameters  
Date\_ 20190106  
Time\_ 17.37  
INSTRUM spect  
PROBHD 5 mm PABBO BB/  
PULPROG zg30  
TD 32768  
SOLVENT CDC13  
NS 12  
DS 1  
SWH 8223.685 Hz  
FIDRES 0.250967 Hz  
AQ 1.9922944 sec  
RG 32.25  
DW 60.800 usec  
DE 6.50 usec  
TE 296.9 K  
D1 1.00000000 sec  
TD0 1

===== CHANNEL f1 =====  
SFO1 400.1524711 MHz  
NUC1 1H  
P1 14.75 usec  
PLW1 12.00000000 W

F2 - Processing parameters  
SI 16384  
SF 400.1500096 MHz  
WDW EM  
SSB 0  
LB 0.30 Hz  
GB 0  
PC 1.00

158.19  
155.70  
143.87  
140.50  
134.83  
131.81  
131.77  
131.20  
128.72  
128.49  
128.26  
126.61  
126.56  
126.51  
126.46  
125.66  
122.81  
122.29  
105.08

77.48  
77.16  
76.85

55.73

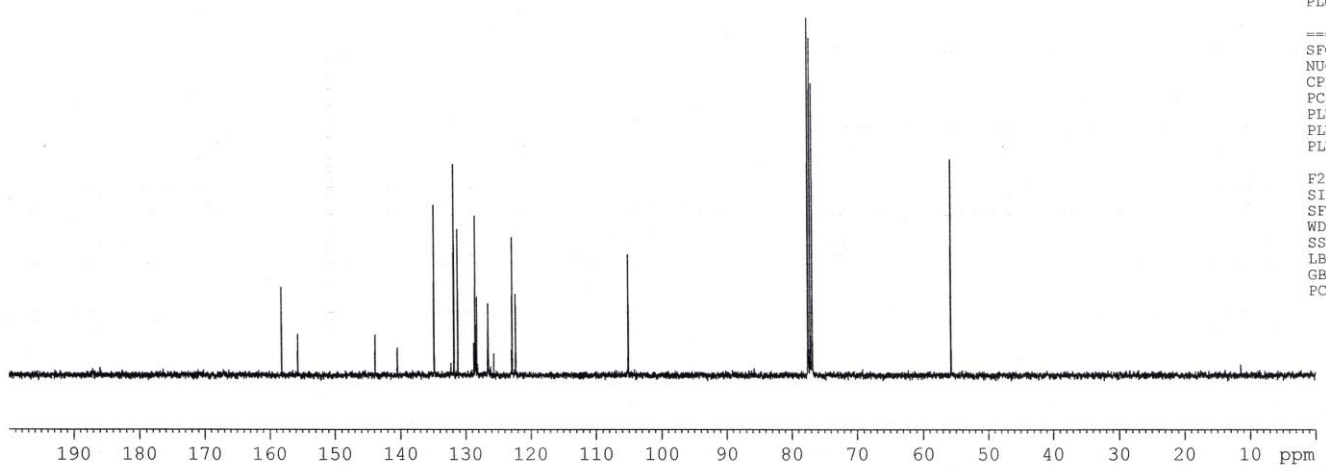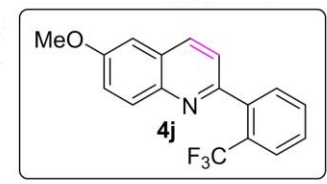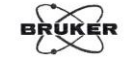

Current Data Parameters  
NAME Dr. A MAJEE 2018  
EXPNO 749  
PROCNO 1

F2 - Acquisition Parameters  
Date\_ 20190106  
Time\_ 17.34  
INSTRUM spect  
PROBHD 5 mm PABBO BB/  
PULPROG zgpg30  
TD 32768  
SOLVENT CDCl3  
NS 320  
DS 2  
SWH 24038.461 Hz  
FIDRES 0.733596 Hz  
AQ 0.6815744 sec  
RG 186.42  
DW 20.800 usec  
DE 6.50 usec  
TE 297.3 K  
D1 2.00000000 sec  
D11 0.03000000 sec  
TD0 1

----- CHANNEL f1 -----  
SFO1 100.6278588 MHz  
NUC1 13C  
P1 8.90 usec  
PLW1 54.00000000 W

----- CHANNEL f2 -----  
SFO2 400.1516006 MHz  
NUC2 1H  
CPDPRG[2] waltz16  
PCPD2 90.00 usec  
PLW2 12.00000000 W  
PLW12 0.32231000 W  
PLW13 0.16212000 W

F2 - Processing parameters  
SI 16384  
SF 100.6177849 MHz  
WDW EM  
SSB 0  
LB 1.00 Hz  
GB 0  
PC 2.00

<sup>1</sup>H of VBSSM 423/37

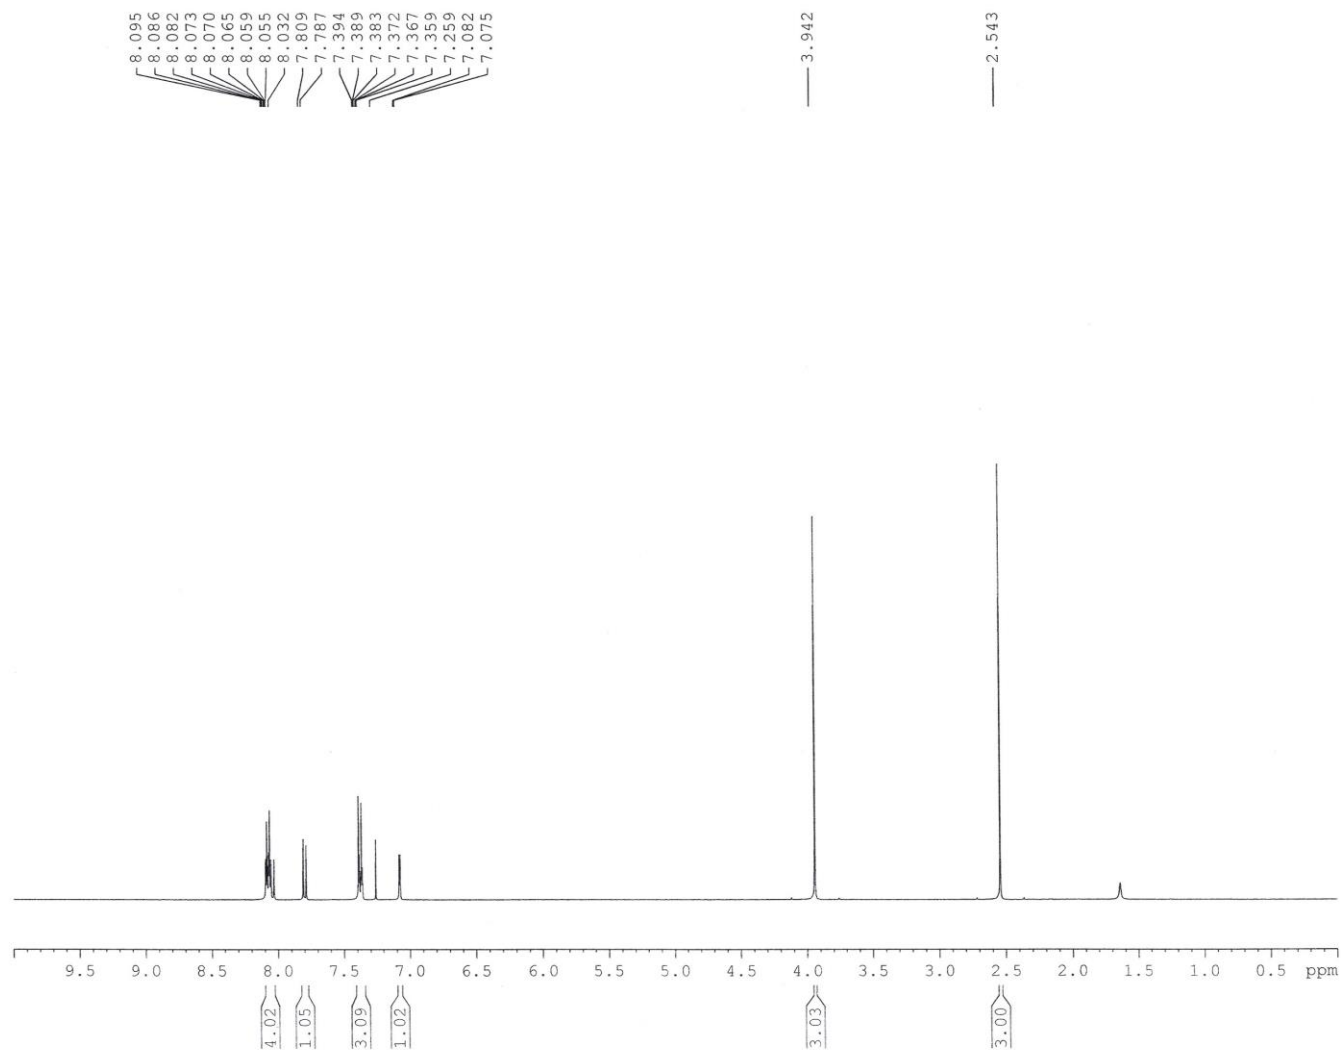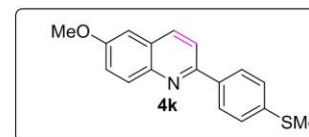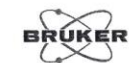

Current Data Parameters  
NAME Dr. A MAJEE 2018  
EXPNO 733  
PROCNO 1

F2 - Acquisition Parameters  
Date\_ 20180909  
Time 16.14  
INSTRUM spect  
PROBHD 5 mm PABBO BB/  
PULPROG zg30  
TD 32768  
SOLVENT CDC13  
NS 16  
DS 1  
SWH 8223.685 Hz  
FIDRES 0.250967 Hz  
AQ 1.9922944 sec  
RG 106.66  
DW 60.800 usec  
DE 6.50 usec  
TE 299.5 K  
D1 1.0000000 sec  
TD0 1

===== CHANNEL f1 =====  
SF01 400.1524711 MHz  
NUC1 1H  
P1 14.75 usec  
PLW1 12.00000000 W

F2 - Processing parameters  
SI 16384  
SF 400.1500098 MHz  
WDW EM  
SSB 0  
LB 0.30 Hz  
GB 0  
PC 1.00

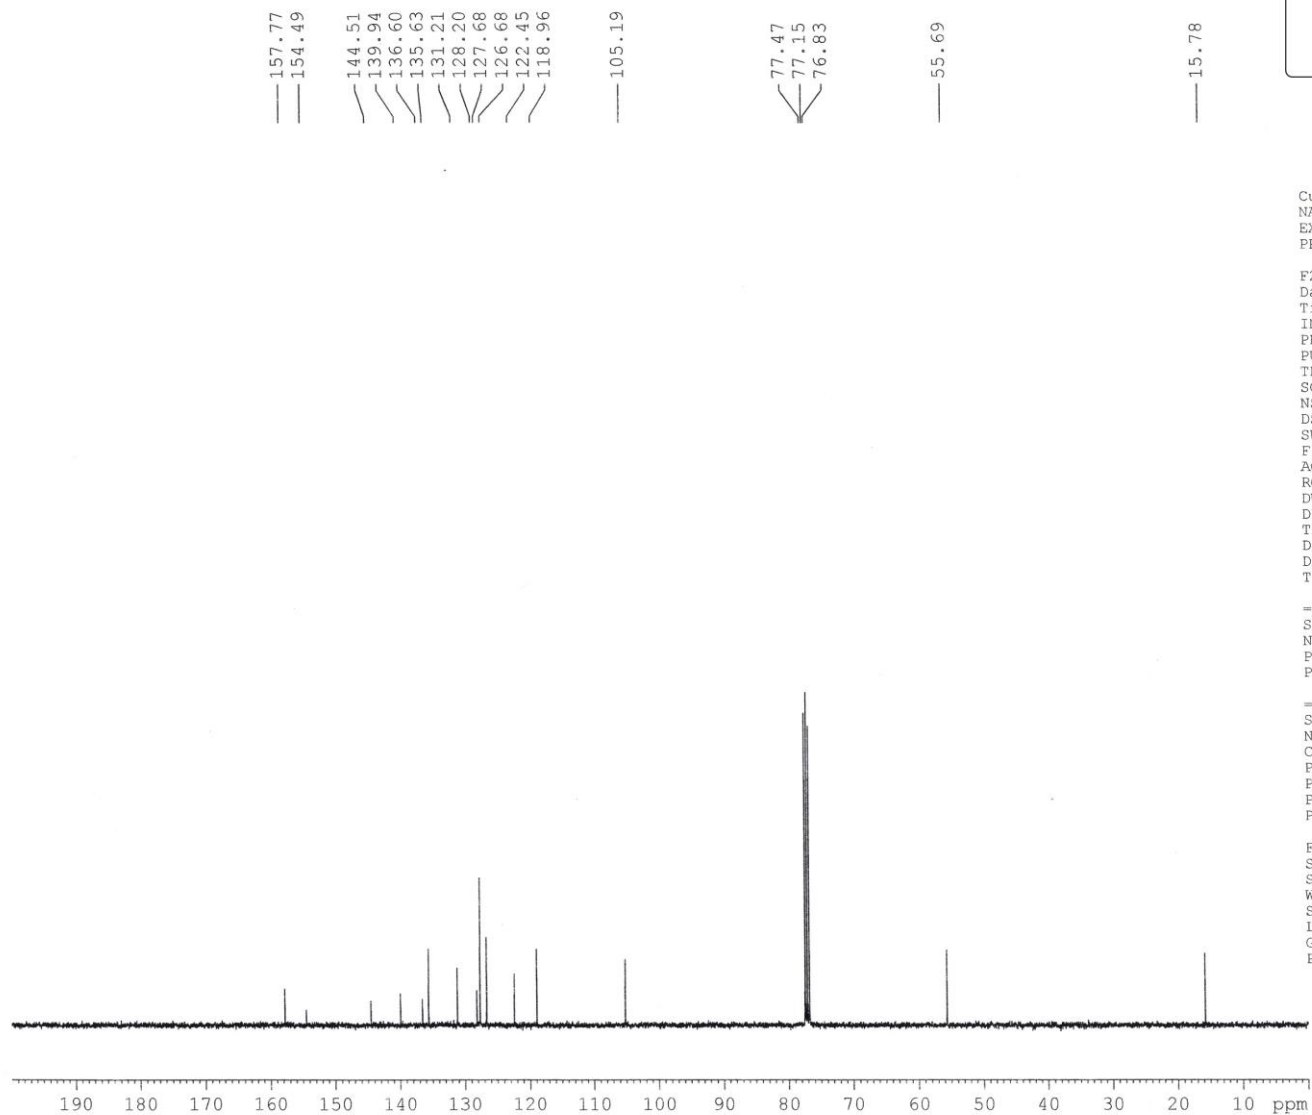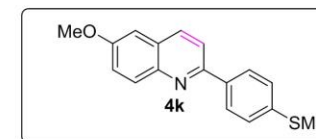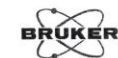

Current Data Parameters  
 NAME Dr. A MAJEE 2018  
 EXPNO 734  
 PROCNO 1

F2 - Acquisition Parameters  
 Date\_ 20180909  
 Time 16.30  
 INSTRUM spect  
 PROBHD 5 mm PABBO BB/  
 PULPROG zgpg30  
 TD 32768  
 SOLVENT CDC13  
 NS 320  
 DS 2  
 SWH 24038.461 Hz  
 FIDRES 0.733596 Hz  
 AQ 0.6815744 sec  
 RG 186.42  
 DW 20.800 usec  
 DE 6.50 usec  
 TE 300.1 K  
 D1 2.00000000 sec  
 D11 0.03000000 sec  
 TD0 1

===== CHANNEL f1 =====  
 SFO1 100.6278588 MHz  
 NUC1 13C  
 P1 8.90 usec  
 PLW1 54.00000000 W

===== CHANNEL f2 =====  
 SFO2 400.1516006 MHz  
 NUC2 1H  
 CPDPRG[2] waltz16  
 PCPD2 90.00 usec  
 PLW2 12.00000000 W  
 PLW12 0.32231000 W  
 PLW13 0.16212000 W

F2 - Processing parameters  
 SI 16384  
 SF 100.6177844 MHz  
 WDW EM  
 SSB 0  
 LB 1.00 Hz  
 GB 0  
 PC 2.00



1H of VBSSM 423/44

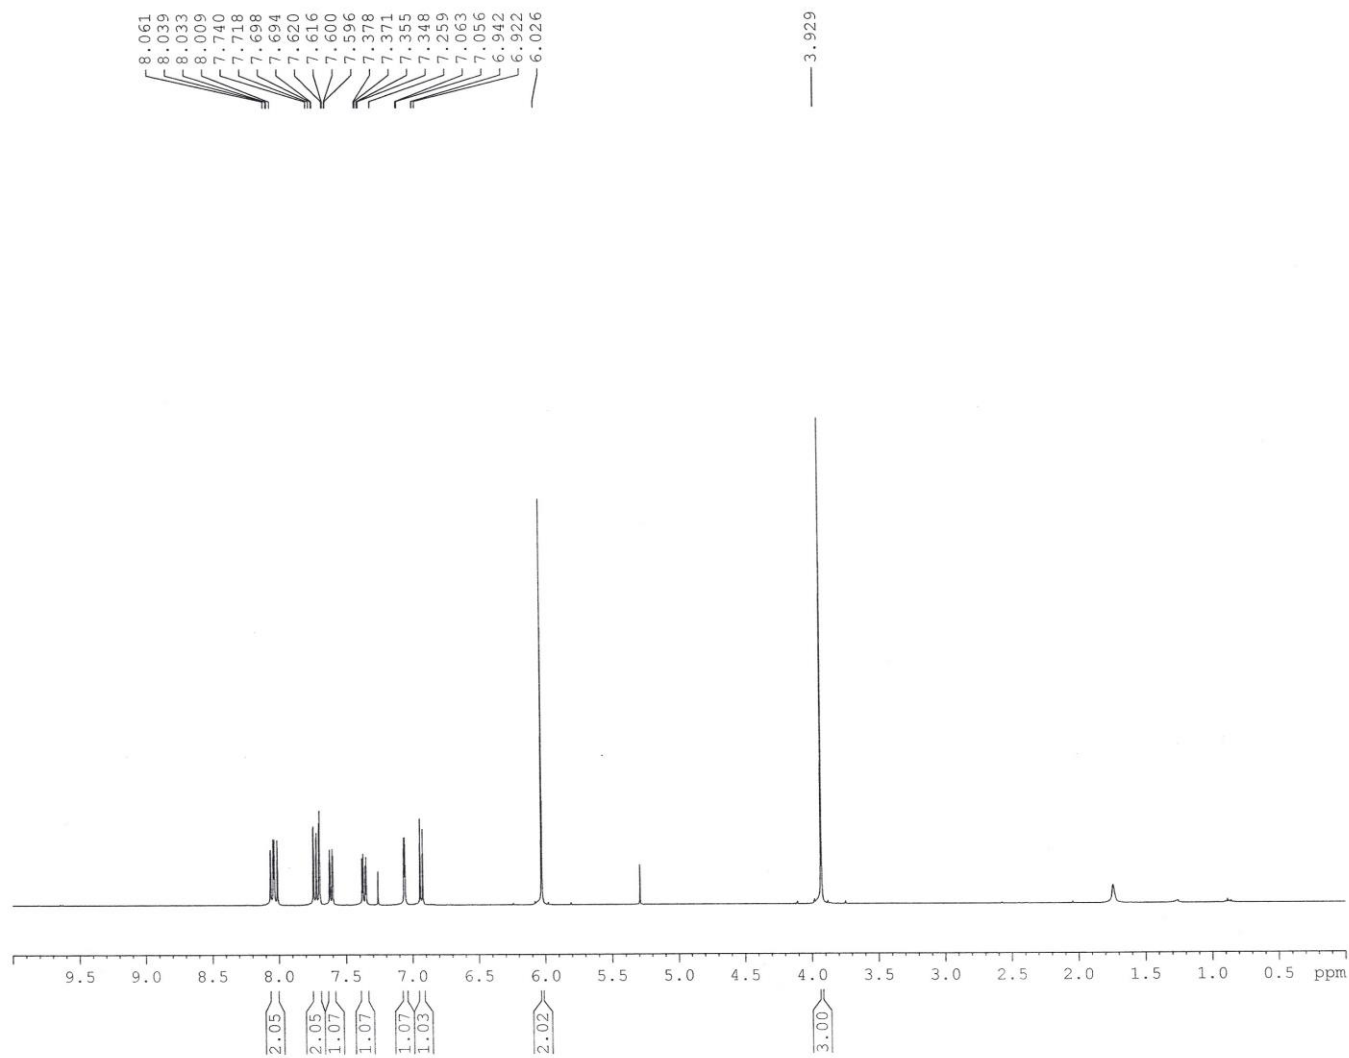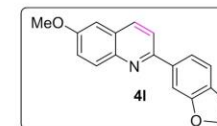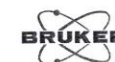

Current Data Parameters  
NAME Dr. A MAJEE 2018  
EXPNO 760  
PROCNO 1

F2 - Acquisition Parameters  
Date\_ 20180921  
Time 14.28  
INSTRUM spect  
PROBHD 5 mm PABBO BB/  
PULPROG zg30  
TD 32768  
SOLVENT CDC13  
NS 12  
DS 1  
SWH 8223.685 Hz  
FIDRES 0.250967 Hz  
AQ 1.9922944 sec  
RG 87.66  
DW 60.800 usec  
DE 6.50 usec  
TE 296.7 K  
D1 1.00000000 sec  
TD0 1

===== CHANNEL f1 =====  
SF01 400.1524711 MHz  
NUC1 1H  
P1 14.75 usec  
PLW1 12.00000000 W

F2 - Processing parameters  
SI 16384  
SF 400.1500099 MHz  
WDW EM  
SSB 0  
LB 0.30 Hz  
GB 0  
PC 1.00

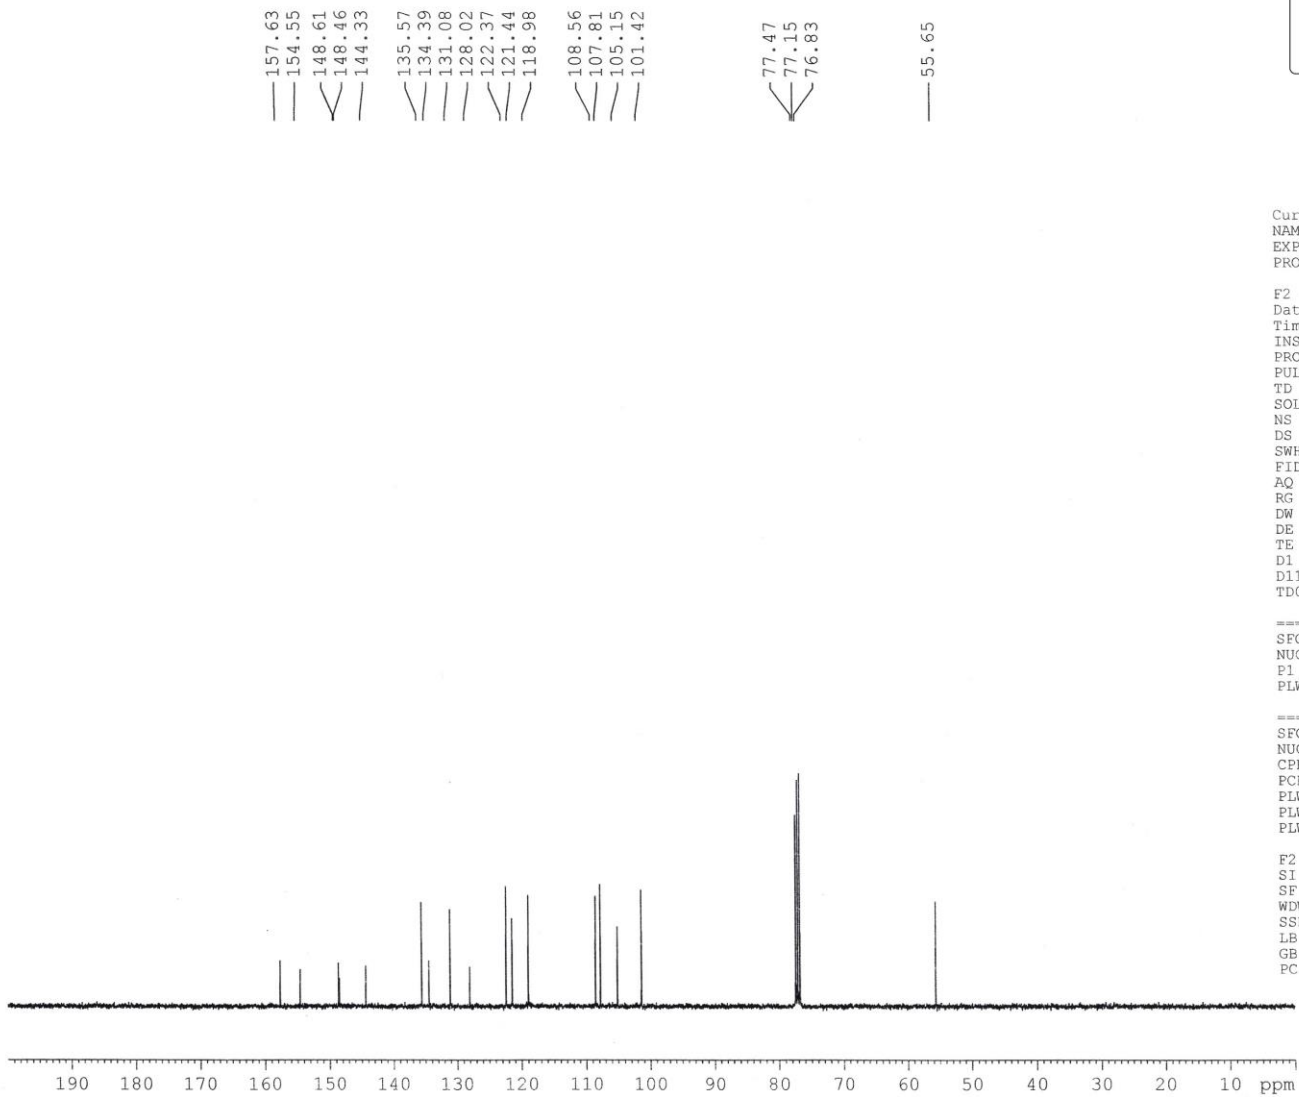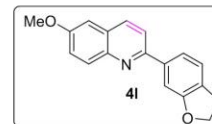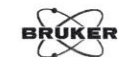

Current Data Parameters  
 NAME Dr. A MAJEE 2018  
 EXPNO 761  
 PROCNO 1

F2 - Acquisition Parameters  
 Date\_ 20180921  
 Time 14.39  
 INSTRUM spect  
 PROBHD 5 mm PABBO BB/  
 PULPROG zgpg30  
 TD 32768  
 SOLVENT CDC13  
 NS 220  
 DS 2  
 SWH 24038.461 Hz  
 FIDRES 0.733596 Hz  
 AQ 0.6815744 sec  
 RG 186.42  
 DW 20.800 usec  
 DE 6.50 usec  
 TE 297.2 K  
 D1 2.00000000 sec  
 D11 0.03000000 sec  
 TD0 1

===== CHANNEL f1 =====  
 SFO1 100.6278588 MHz  
 NUC1 13C  
 P1 8.90 usec  
 PLW1 54.00000000 W

===== CHANNEL f2 =====  
 SFO2 400.1516006 MHz  
 NUC2 1H  
 CPDPRG[2] waltz16  
 FCPD2 90.00 usec  
 PLW2 12.00000000 W  
 PLW12 0.32231000 W  
 PLW13 0.16212000 W

F2 - Processing parameters  
 SI 16384  
 SF 100.6177871 MHz  
 WDW EM  
 SSB 0  
 LB 1.00 Hz  
 GB 0  
 PC 2.00

1H of VBSSM 423/23

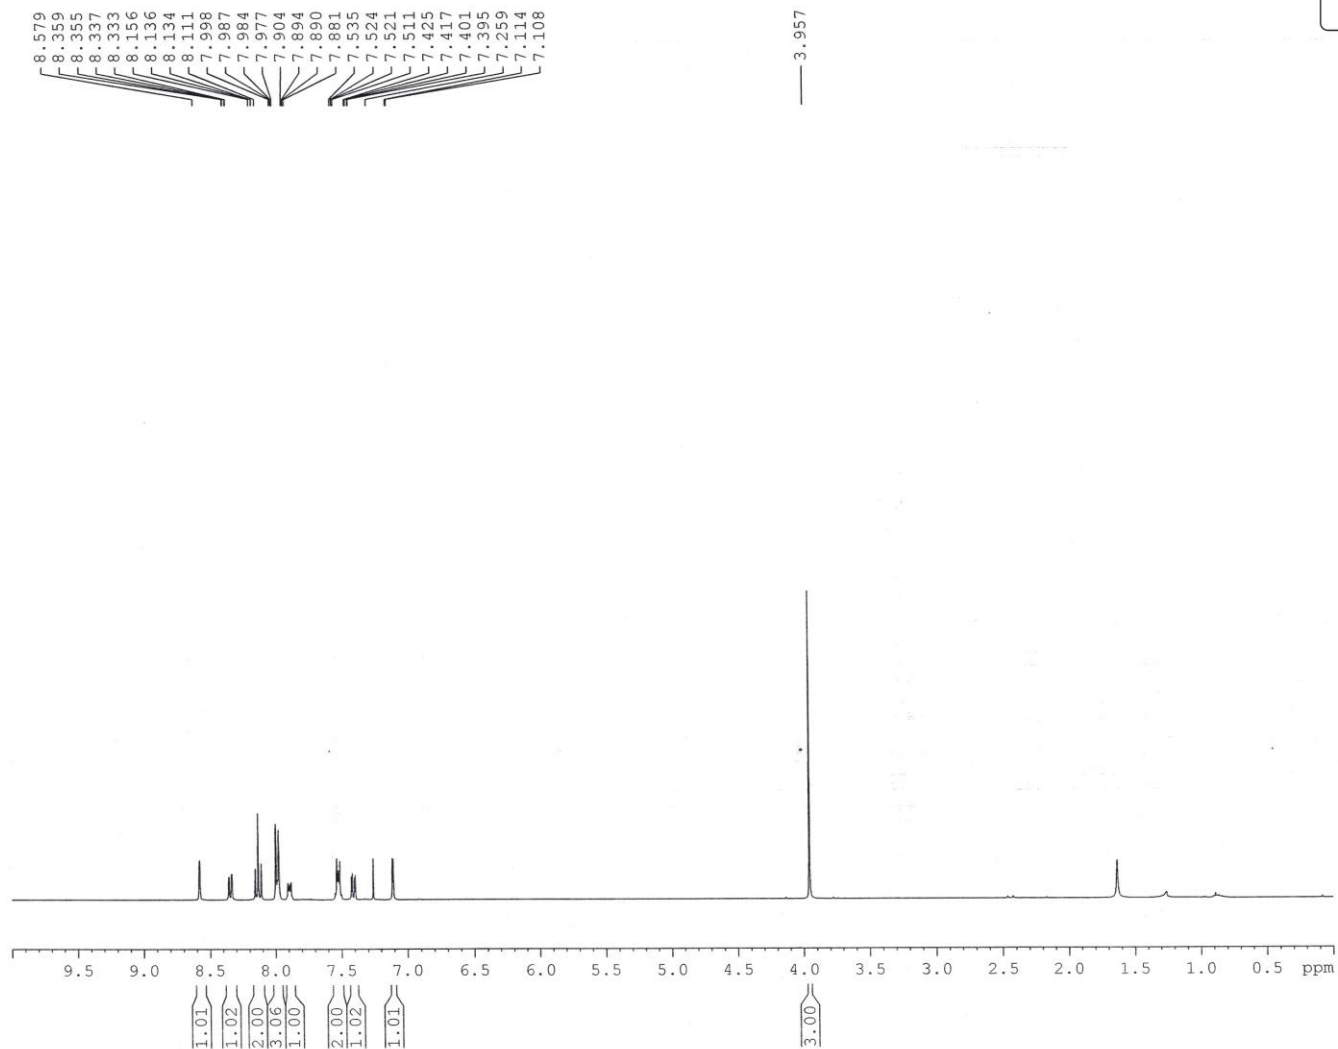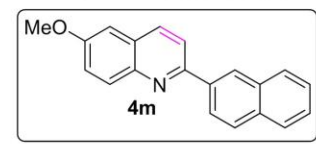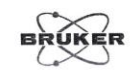

Current Data Parameters  
NAME Dr. A MAJEE 2018  
EXPNO 568  
PROCNO 1

F2 - Acquisition Parameters  
Date\_ 20180716  
Time 13.01  
INSTRUM spect  
PROBHD 5 mm PABBO BB/  
PULPROG zg30  
TD 32768  
SOLVENT CDCl3  
NS 12  
DS 1  
SWH 8223.685 Hz  
FIDRES 0.250967 Hz  
AQ 1.9922944 sec  
RG 135.7  
DW 60.800 usec  
DE 6.50 usec  
TE 299.2 K  
D1 1.00000000 sec  
TD0 1

===== CHANNEL f1 =====  
SFO1 400.1524711 MHz  
NUC1 1H  
P1 14.75 usec  
PLW1 12.00000000 W

F2 - Processing parameters  
SI 16384  
SF 400.1500097 MHz  
WDW EM  
SSB 0  
LB 0.30 Hz  
GB 0  
PC 1.00

157.89  
155.00  
144.62  
137.23  
135.69  
133.84  
133.70  
131.33  
128.89  
128.64  
128.34  
127.85  
126.78  
126.65  
126.41  
125.11  
122.52  
119.54  
105.21

77.48  
77.16  
76.84

— 55.70

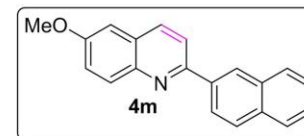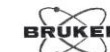

Current Data Parameters  
NAME Dr. A MAJEE 2018  
EXPNO 575  
PROCNO 1

F2 - Acquisition Parameters  
Date\_ 20180716  
Time 13.17  
INSTRUM spect  
PROBHD 5 mm PABBO BB/  
PULPROG zgpg30  
TD 32768  
SOLVENT CDCl3  
NS 320  
DS 2  
SWH 24038.461 Hz  
FIDRES 0.733596 Hz  
AQ 0.6815744 sec  
RG 120.16  
DW 20.800 usec  
DE 6.50 usec  
TE 299.7 K  
D1 2.00000000 sec  
D11 0.03000000 sec  
TDO 1

===== CHANNEL f1 =====  
SFO1 100.6278588 MHz  
NUC1 13C  
P1 8.90 usec  
PLW1 54.00000000 W

===== CHANNEL f2 =====  
SFO2 400.1516006 MHz  
NUC2 1H  
CPDPRG[2] waltz16  
PCPD2 90.00 usec  
PLW2 12.00000000 W  
PLW12 0.32231000 W  
PLW13 0.16212000 W

F2 - Processing parameters  
SI 16384  
SF 100.6177842 MHz  
WDW EM  
SSB 0  
LB 1.00 Hz  
GB 0  
PC 2.00

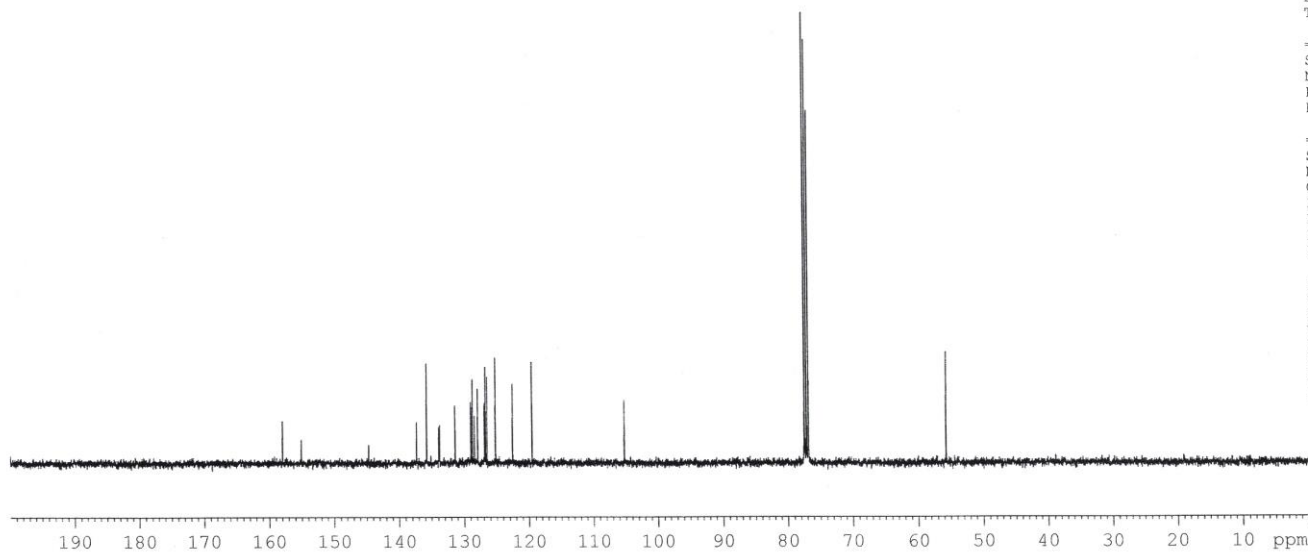

1H of VBSSM 423/46

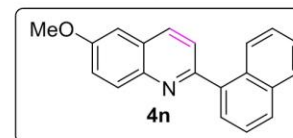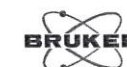

Current Data Parameters  
NAME Dr. A MAJEE 2018  
EXPNO 771  
PROCNO 1

F2 - Acquisition Parameters  
Date\_ 20180925  
Time 12.47  
INSTRUM spect  
PROBHD 5 mm PABBO BB/  
PULPROG zg30  
TD 32768  
SOLVENT CDC13  
NS 12  
DS 1  
SWH 8223.685 Hz  
FIDRES 0.250967 Hz  
AQ 1.9922944 sec  
RG 54.07  
DW 60.800 usec  
DE 6.50 usec  
TE 298.8 K  
D1 1.00000000 sec  
TD0 1

===== CHANNEL f1 =====  
SF01 400.1524711 MHz  
NUC1 1H  
P1 14.75 usec  
PLW1 12.00000000 W

F2 - Processing parameters  
SI 16384  
SF 400.1500097 MHz  
WDW EM  
SSB 0  
LB 0.30 Hz  
GB 0  
PC 1.00

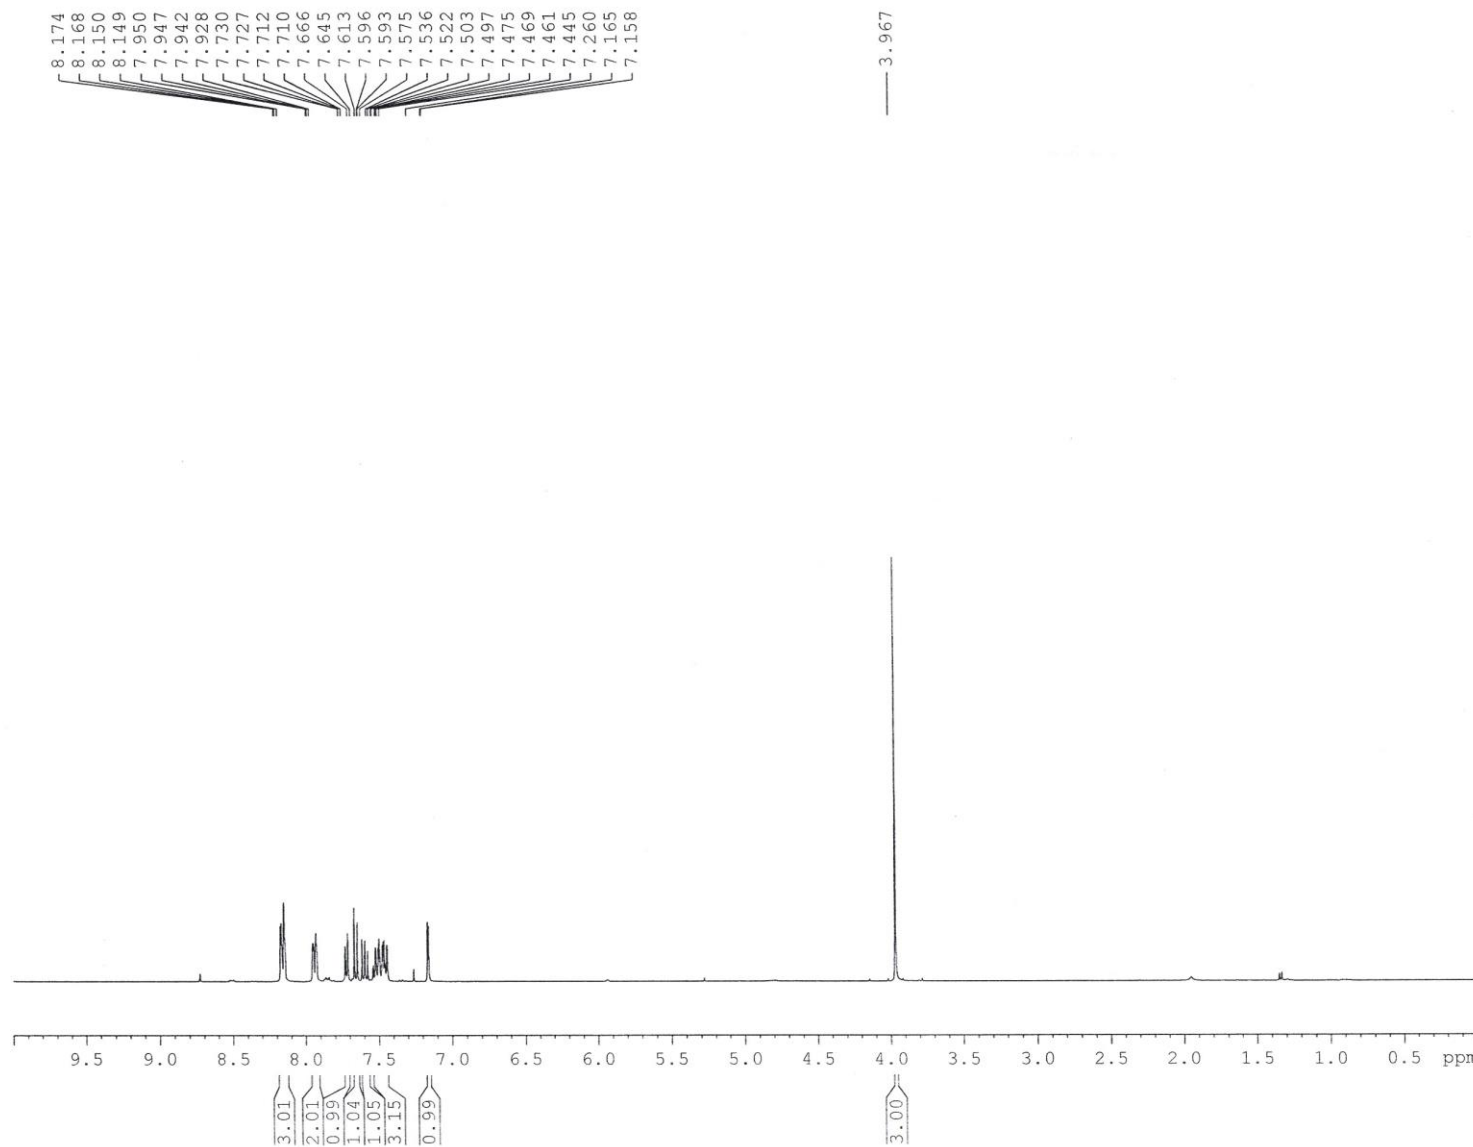

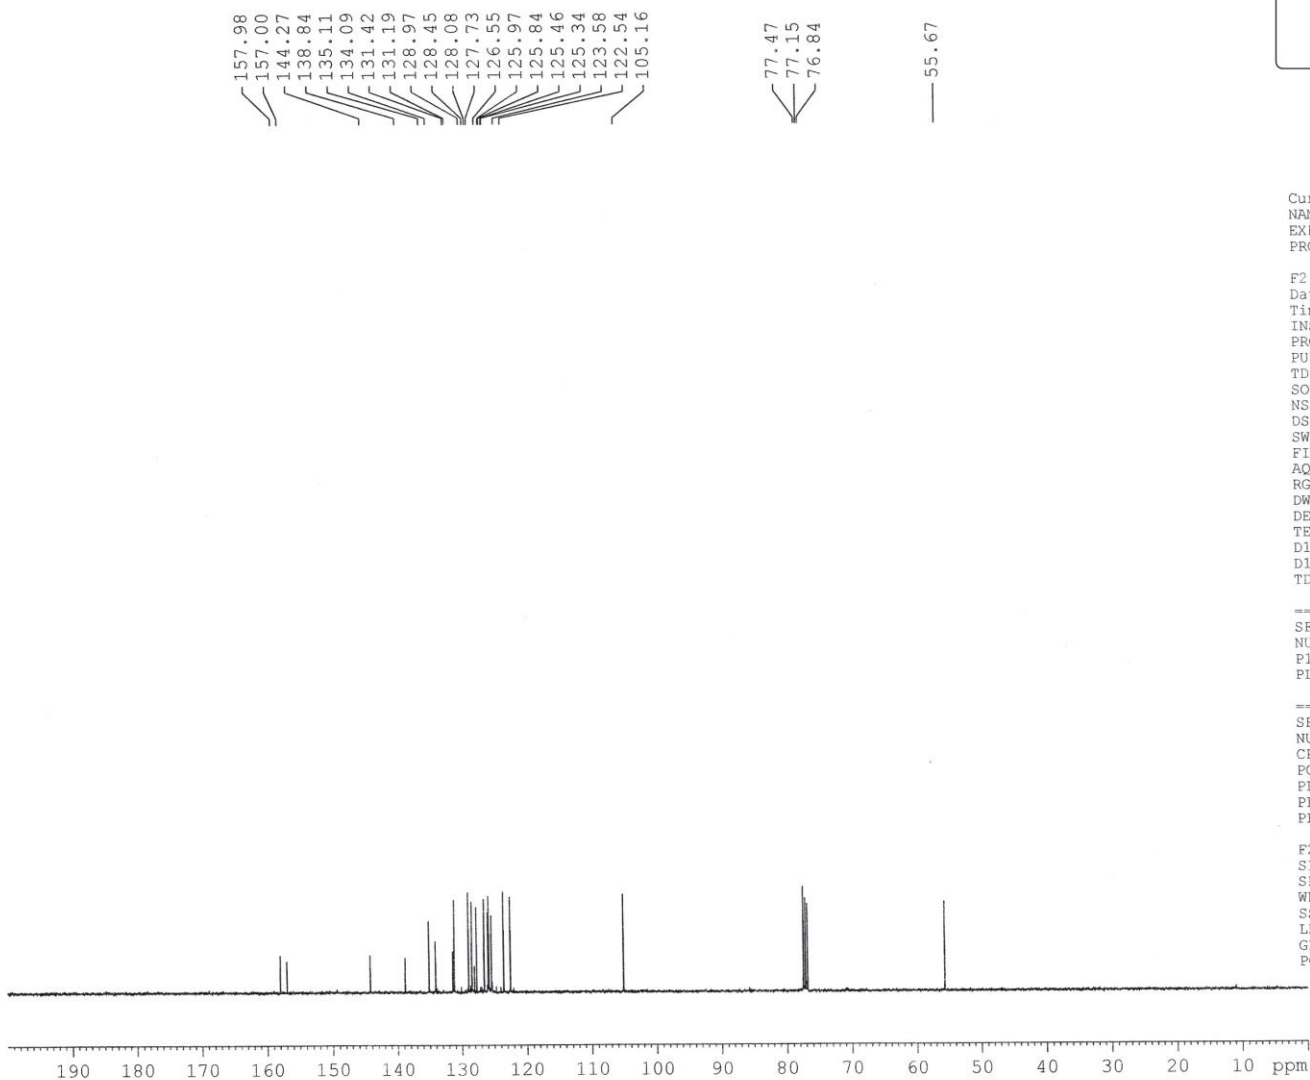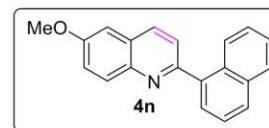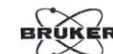

Current Data Parameters  
 NAME Dr. A MAJEE 2018  
 EXPNO 772  
 PROCNO 1

F2 - Acquisition Parameters  
 Date\_ 20180925  
 Time 12.54  
 INSTRUM spect  
 PROBHD 5 mm PABBO BB/  
 PULPROG zgpg30  
 TD 32768  
 SOLVENT CDCl3  
 NS 120  
 DS 2  
 SWH 24038.461 Hz  
 FIDRES 0.733596 Hz  
 AQ 0.6815744 sec  
 RG 77.59  
 DW 20.800 usec  
 DE 6.50 usec  
 TE 299.4 K  
 D1 2.00000000 sec  
 D11 0.03000000 sec  
 TD0 1

===== CHANNEL f1 =====  
 SFO1 100.6278588 MHz  
 NUC1 13C  
 P1 8.90 usec  
 PLW1 54.00000000 W

===== CHANNEL f2 =====  
 SFO2 400.1516006 MHz  
 NUC2 1H  
 CPDPRG[2] waltz16  
 PCPD2 90.00 usec  
 PLW2 12.00000000 W  
 PLW12 0.32231000 W  
 PLW13 0.16212000 W

F2 - Processing parameters  
 SI 16384  
 SF 100.6177936 MHz  
 WDW EM  
 SSB 0  
 LB 1.00 Hz  
 GB 0  
 PC 2.00

1H of VBSSM 423/38

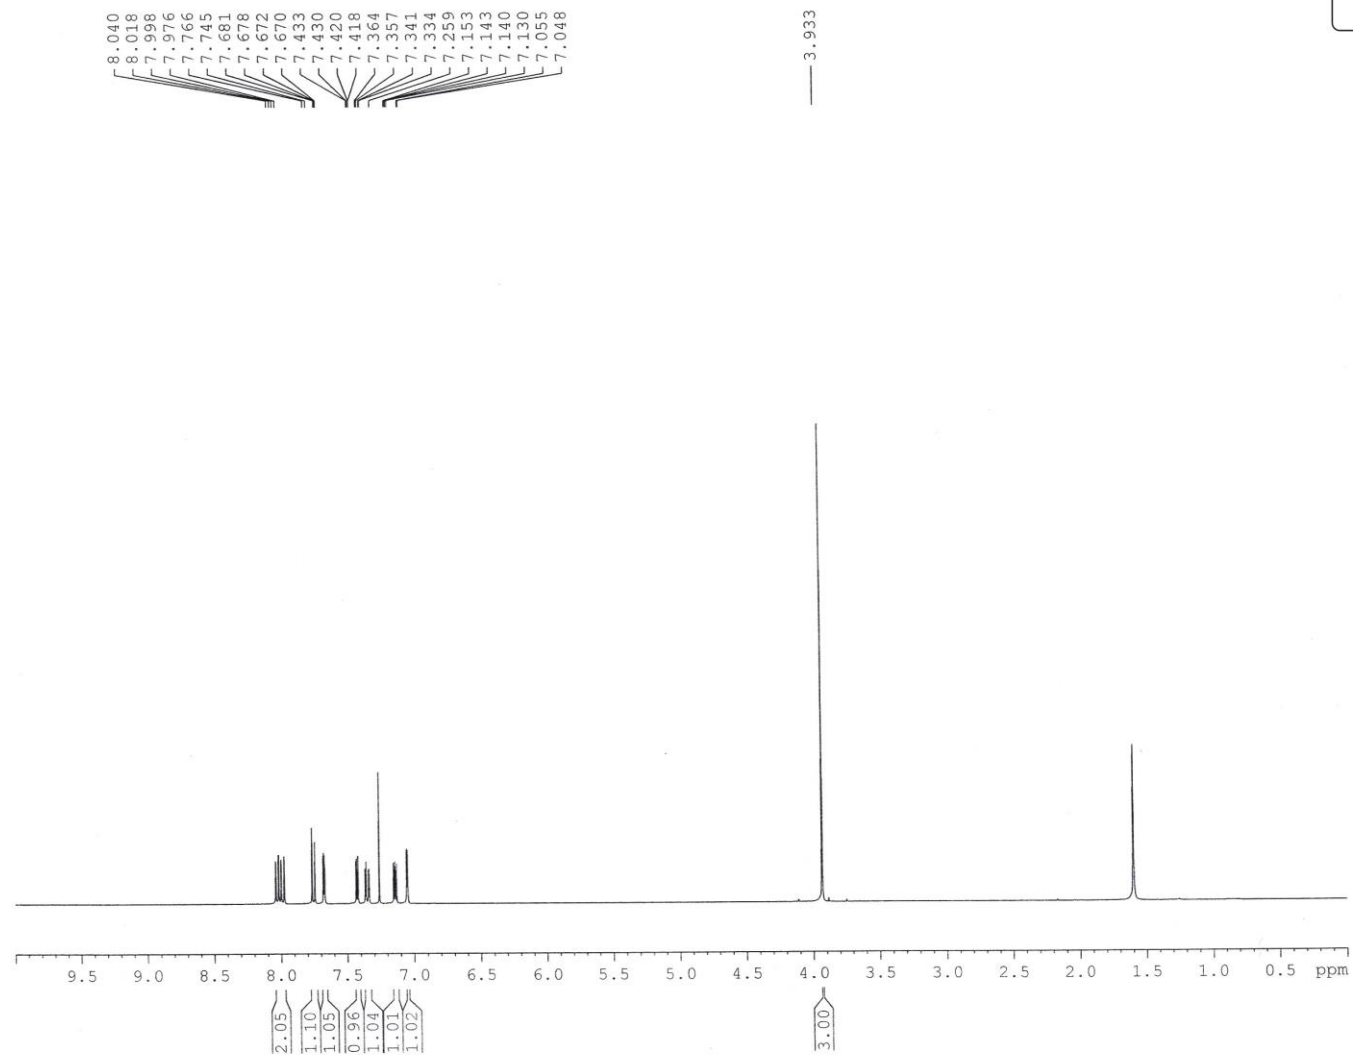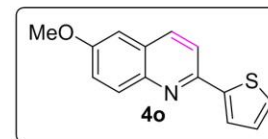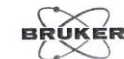

Current Data Parameters  
NAME Dr. A MAJEE 2018  
EXPNO 743  
PROCNO 1

F2 - Acquisition Parameters  
Date\_ 20180913  
Time 17.56  
INSTRUM spect  
PROBHD 5 mm PABBO BB/  
PULPROG zg30  
TD 32768  
SOLVENT CDCl3  
NS 16  
DS 1  
SWH 8223.685 Hz  
FIDRES 0.250967 Hz  
AQ 1.9922944 sec  
RG 186.42  
DW 60.800 usec  
DE 6.50 usec  
TE 298.4 K  
D1 1.00000000 sec  
TD0 1

===== CHANNEL f1 =====  
SF01 400.1524711 MHz  
NUC1 1H  
P1 14.75 usec  
PLW1 12.00000000 W

F2 - Processing parameters  
SI 16384  
SF 400.1500097 MHz  
WDW EM  
SSB 0  
LB 0.30 Hz  
GB 0  
PC 1.00

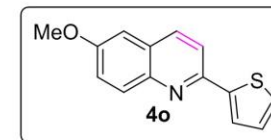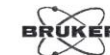

Current Data Parameters  
 NAME Dr. A MAJEE 2018  
 EXPNO 744  
 PROCNO 1

F2 - Acquisition Parameters  
 Date\_ 20180913  
 Time\_ 23.38  
 INSTRUM spect  
 PROBHD 5 mm PABBO BB/  
 PULPROG zgpg  
 TD 32768  
 SOLVENT CDCl3  
 NS 1024  
 DS 2  
 SWH 24038.461 Hz  
 FIDRES 0.733596 Hz  
 AQ 0.6815744 sec  
 RG 186.42  
 DW 20.800 usec  
 DE 6.50 usec  
 TE 299.3 K  
 D1 2.00000000 sec  
 D11 0.03000000 sec  
 TD0 1

===== CHANNEL f1 =====  
 SFO1 100.6278588 MHz  
 NUC1 13C  
 P1 8.90 usec  
 PLW1 54.00000000 W

===== CHANNEL f2 =====  
 SFO2 400.1516006 MHz  
 NUC2 1H  
 CPDPRG[2] waltz16  
 PCPD2 90.00 usec  
 PLW2 12.00000000 W  
 PLW12 0.32231000 W

F2 - Processing parameters  
 SI 16384  
 SF 100.6177833 MHz  
 WDW EM  
 SSB 0  
 LB 1.00 Hz  
 GB 0  
 PC 2.00

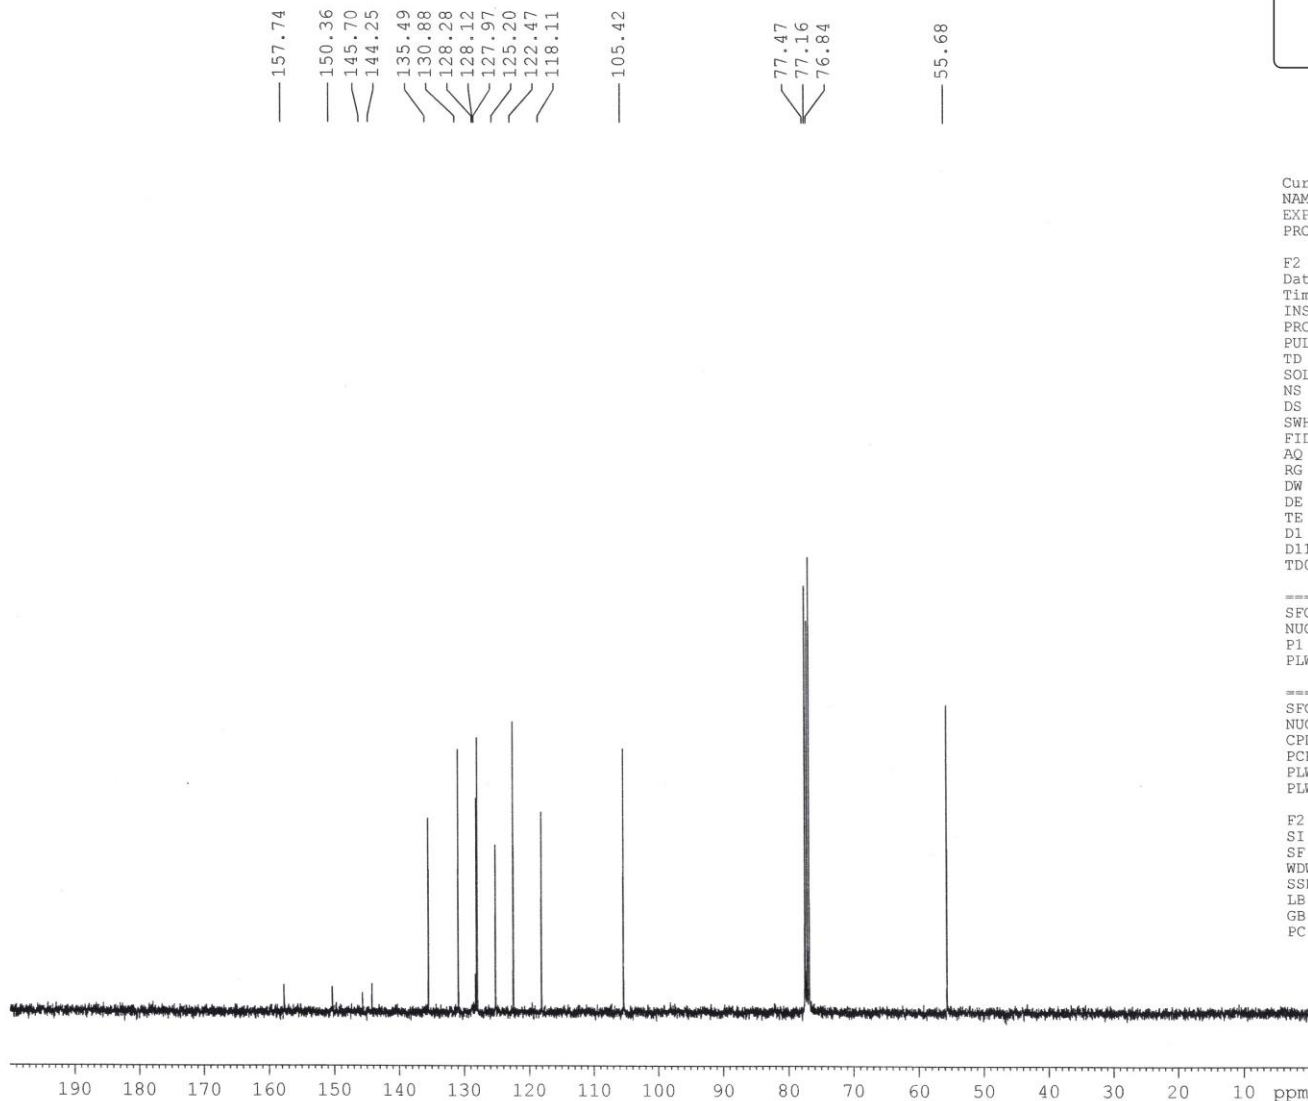



1H of VBSSM 423/39

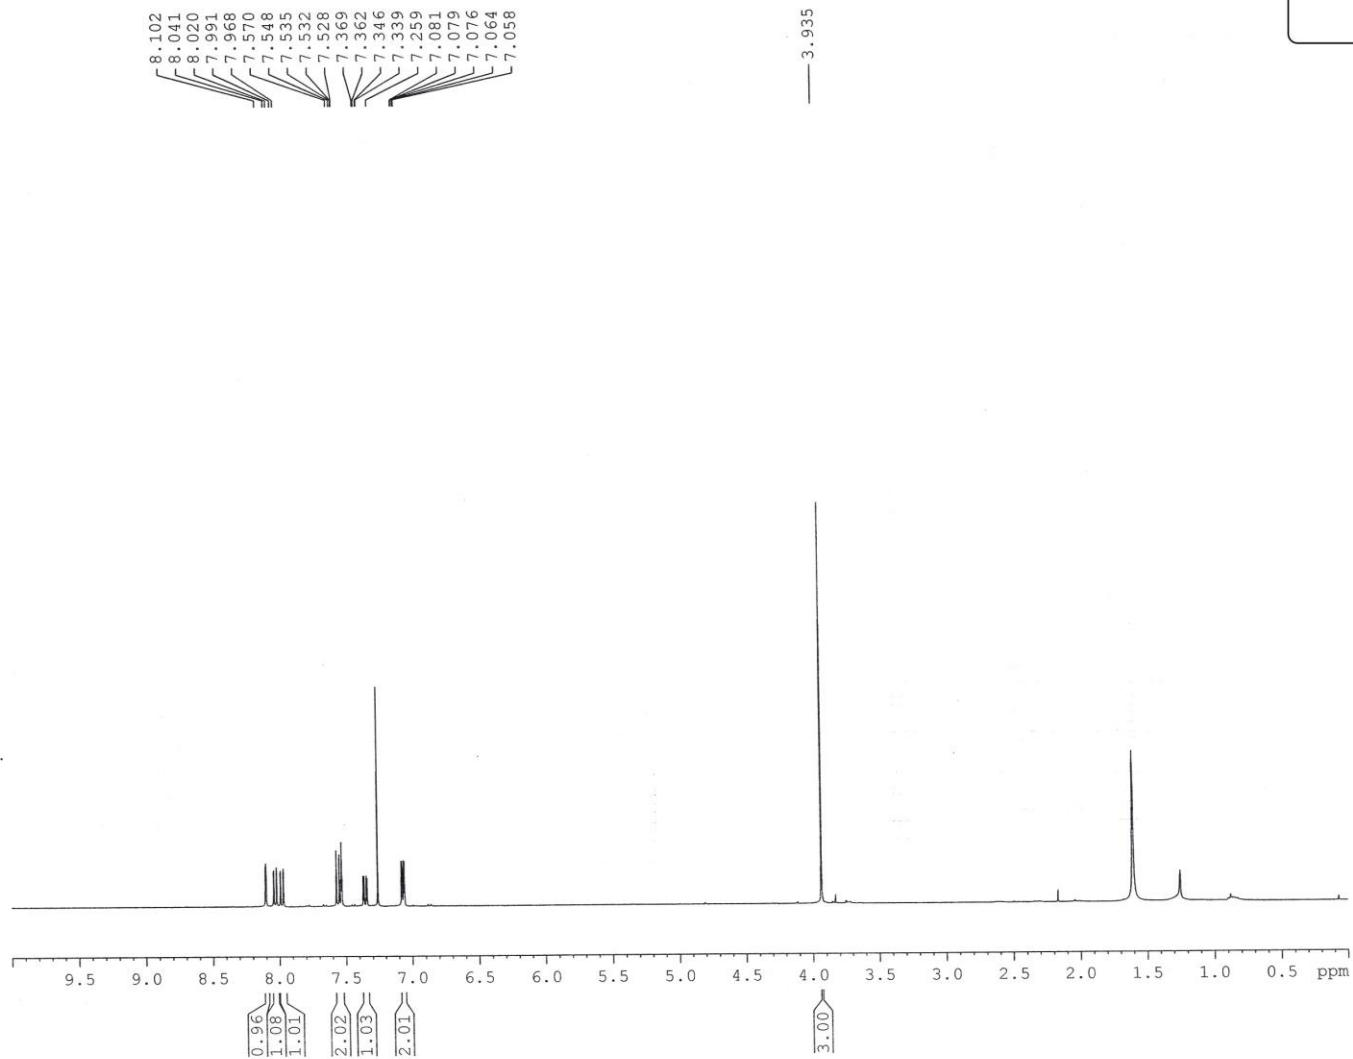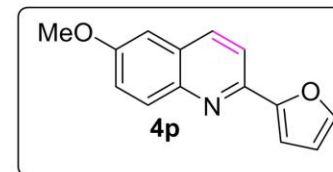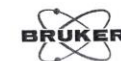

Current Data Parameters  
NAME Dr. A MAJEE 2018  
EXPNO 741  
PROCNO 1

F2 - Acquisition Parameters  
Date\_ 20180914  
Time\_ 15.32  
INSTRUM spect  
PROBHD 5 mm PABBO BB/  
PULPROG zg30  
TD 32768  
SOLVENT CDCl3  
NS 20  
DS 1  
SWH 8223.685 Hz  
FIDRES 0.250967 Hz  
AQ 1.9922944 sec  
RG 186.42  
DW 60.800 usec  
DE 6.50 usec  
TE 298.4 K  
D1 1.00000000 sec  
TD0 1

===== CHANNEL f1 =====  
SFO1 400.1524711 MHz  
NUC1 1H  
P1 14.75 usec  
PLW1 12.00000000 W

F2 - Processing parameters  
SI 16384  
SF 400.1500097 MHz  
WDW EM  
SSB 0  
LB 0.30 Hz  
GB 0  
PC 1.00

13C of VBSSM 423/39

157.67  
149.64  
144.45  
144.04  
141.60  
135.44  
130.83  
128.14  
127.83  
122.34  
119.38  
109.17  
105.41

77.47  
77.15  
76.83

55.68

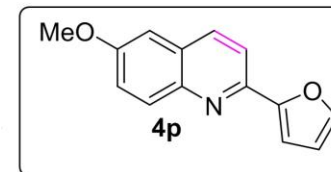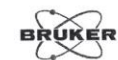

Current Data Parameters  
NAME Dr. A MAJEE 2018  
EXPNO 742  
PROCNO 1

F2 - Acquisition Parameters  
Date\_ 20180914  
Time 22.35  
INSTRUM spect  
PROBHD 5 mm PABBO BB/  
PULPROG zgpg  
TD 32768  
SOLVENT CDCl3  
NS 1024  
DS 2  
SWH 24038.461 Hz  
FIDRES 0.733596 Hz  
AQ 0.6815744 sec  
RG 186.42  
DW 20.800 usec  
DE 6.50 usec  
TE 299.5 K  
D1 2.00000000 sec  
D11 0.03000000 sec  
TD0 1

===== CHANNEL f1 =====  
SFO1 100.6278588 MHz  
NUC1 13C  
P1 8.90 usec  
PLW1 54.00000000 W

===== CHANNEL f2 =====  
SFO2 400.1516006 MHz  
NUC2 1H  
CPDPRG2 waltz16  
PCPD2 90.00 usec  
PLW2 12.00000000 W  
PLW12 0.32231000 W

F2 - Processing parameters  
SI 16384  
SF 100.6177831 MHz  
WDW EM  
SSB 0  
LB 1.00 Hz  
GB 0  
PC 2.00

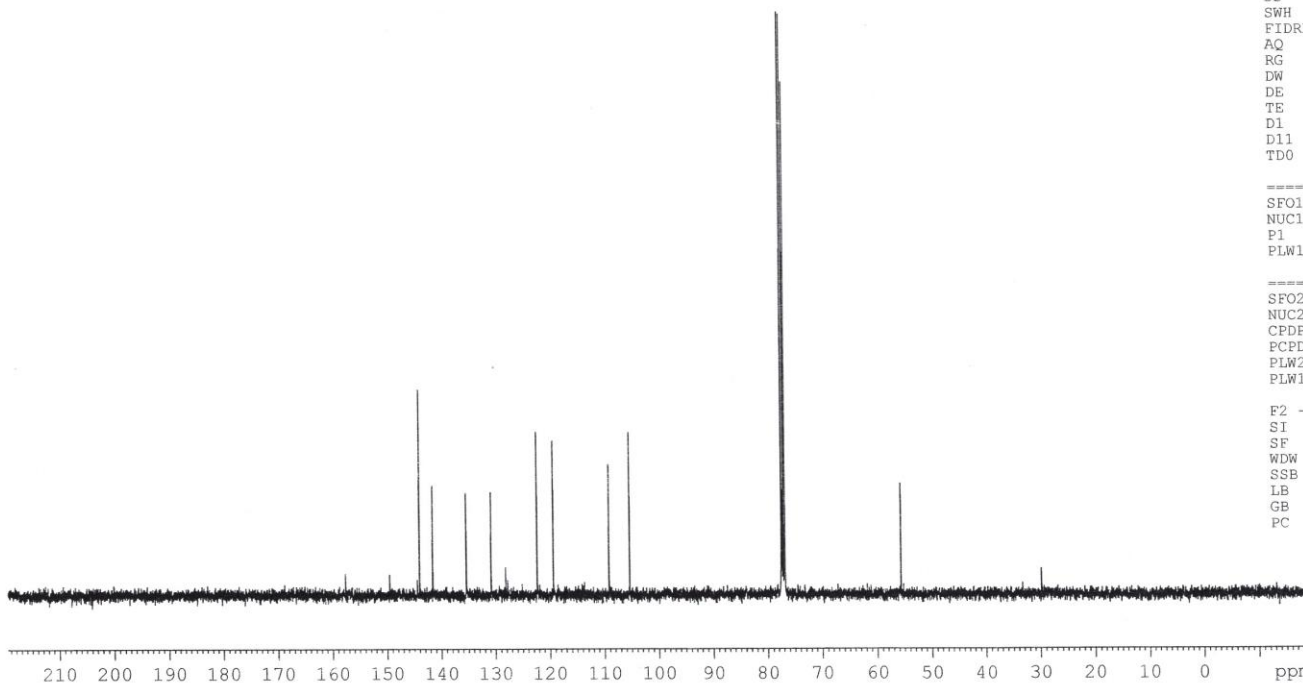

1H of VBSSM-423/60

8.239  
8.217  
8.195  
8.183  
8.179  
8.174  
8.161  
8.159  
7.895  
7.874  
7.847  
7.844  
7.826  
7.824  
7.756  
7.753  
7.739  
7.735  
7.731  
7.717  
7.714  
7.553  
7.539  
7.535  
7.520  
7.489  
7.471  
7.452  
7.443  
7.259

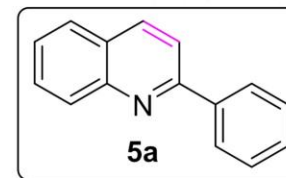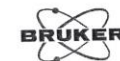

Current Data Parameters  
NAME Dr. A MAJEE 2018  
EXPNO 836  
PROCNO 1

F2 - Acquisition Parameters  
Date\_ 20181125  
Time\_ 17.35  
INSTRUM spect  
PROBHD 5 mm PABBO BB/  
PULPROG zg30  
TD 32768  
SOLVENT CDCl3  
NS 12  
DS 1  
SWH 8223.685 Hz  
FIDRES 0.250967 Hz  
AQ 1.9922944 sec  
RG 87.66  
DW 60.800 usec  
DE 6.50 usec  
TE 295.1 K  
D1 1.0000000 sec  
TD0 1

===== CHANNEL f1 =====  
SF01 400.1524711 MHz  
NUC1 1H  
P1 14.75 usec  
PLW1 12.0000000 W

F2 - Processing parameters  
SI 16384  
SF 400.1500097 MHz  
WDW EM  
SSB 0  
LB 0.30 Hz  
GB 0  
PC 1.00

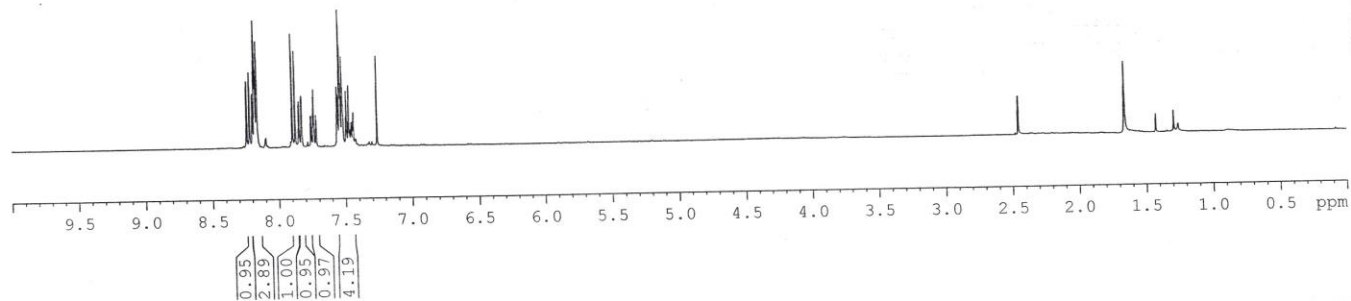

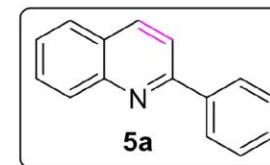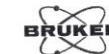

Current Data Parameters  
 NAME Dr. A MAJEE 2018  
 EXPNO 837  
 PROCNO 1

F2 - Acquisition Parameters  
 Date\_ 20181125  
 Time 17.48  
 INSTRUM spect  
 PROBHD 5 mm PABBO BB/  
 PULPROG zgpg30  
 TD 32768  
 SOLVENT CDC13  
 NS 256  
 DS 2  
 SWH 24038.461 Hz  
 FIDRES 0.733596 Hz  
 AQ 0.6815744 sec  
 RG 186.42  
 DW 20.800 usec  
 DE 6.50 usec  
 TE 295.8 K  
 D1 2.00000000 sec  
 D11 0.03000000 sec  
 TD0 1

----- CHANNEL f1 -----  
 SFO1 100.6278588 MHz  
 NUC1 13C  
 P1 8.90 usec  
 PLW1 54.00000000 W

----- CHANNEL f2 -----  
 SFO2 400.1516006 MHz  
 NUC2 1H  
 CPDPRG[2] waltz16  
 PCPD2 90.00 usec  
 PLW2 12.00000000 W  
 PLW12 0.32231000 W  
 PLW13 0.16212000 W

F2 - Processing parameters  
 SI 16384  
 SF 100.6177861 MHz  
 WDW EM  
 SSB 0  
 LB 1.00 Hz  
 GB 0  
 PC 2.00

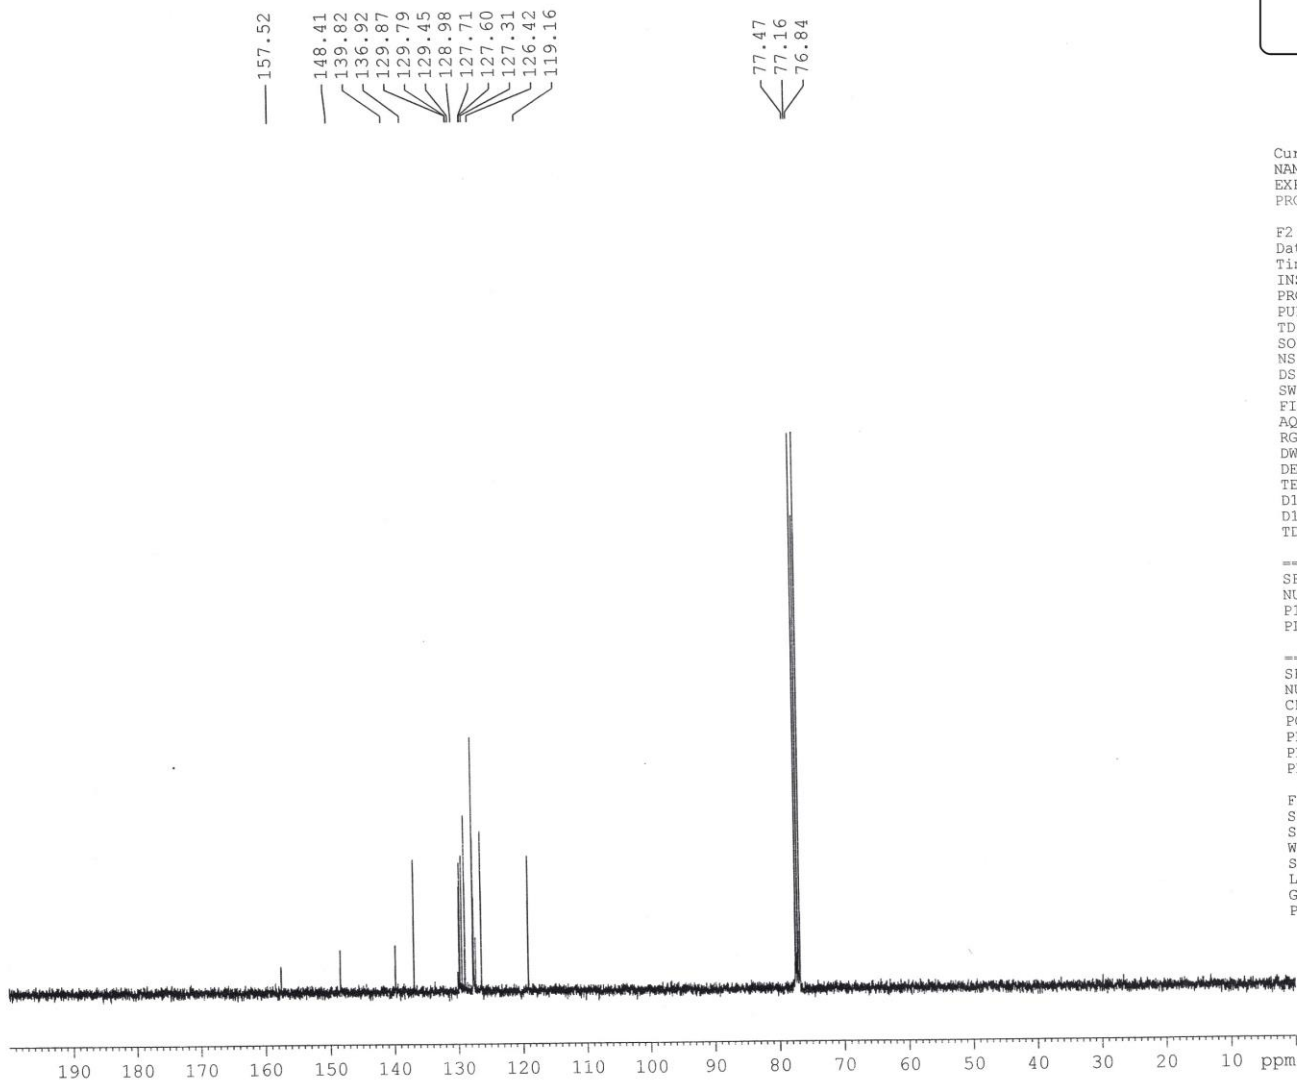

1H of VBSSM-423/53

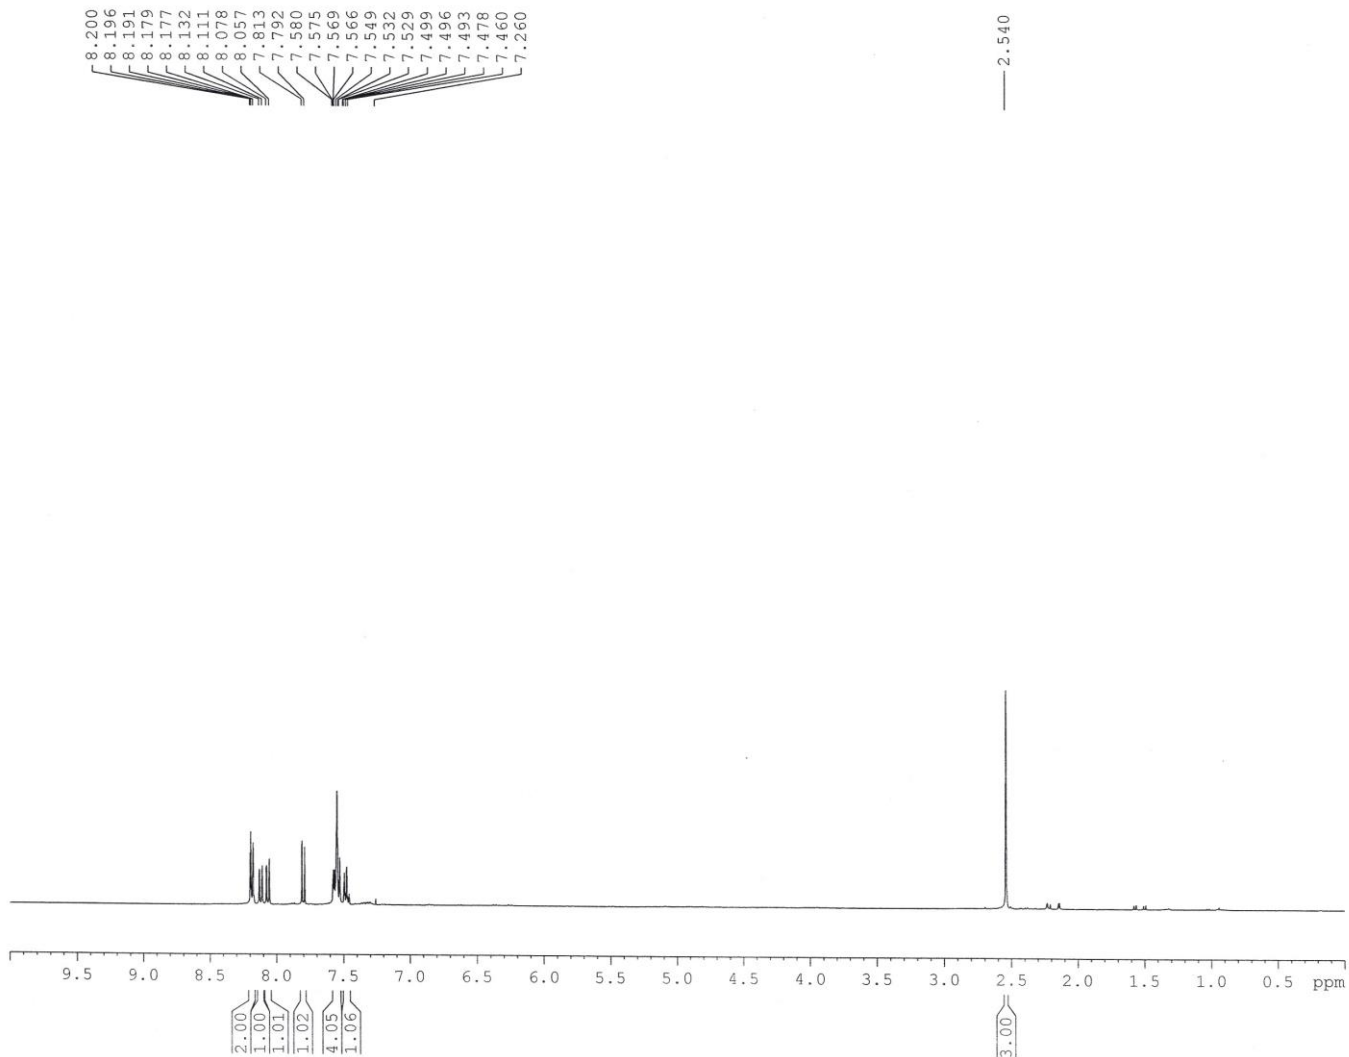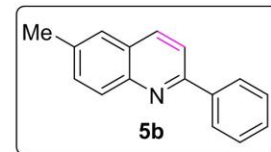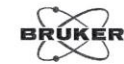

Current Data Parameters  
NAME Dr. A MAJEE 2018  
EXPNO 784  
PROCNO 1

F2 - Acquisition Parameters  
Date\_ 20181003  
Time 20.00  
INSTRUM spect  
PROBHD 5 mm PABBO BB/  
PULPROG zg30  
TD 32768  
SOLVENT CDC13  
NS 12  
DS 1  
SWH 8223.685 Hz  
FIDRES 0.250967 Hz  
AQ 1.9922944 sec  
RG 20.64  
DW 60.800 usec  
DE 6.50 usec  
TE 298.6 K  
D1 1.00000000 sec  
TD0 1

===== CHANNEL f1 =====  
SFO1 400.1524711 MHz  
NUC1 1H  
P1 14.75 usec  
PLW1 12.00000000 W

F2 - Processing parameters  
SI 16384  
SF 400.1500097 MHz  
WDW EM  
SSB 0  
LB 0.30 Hz  
GB 0  
PC 1.00

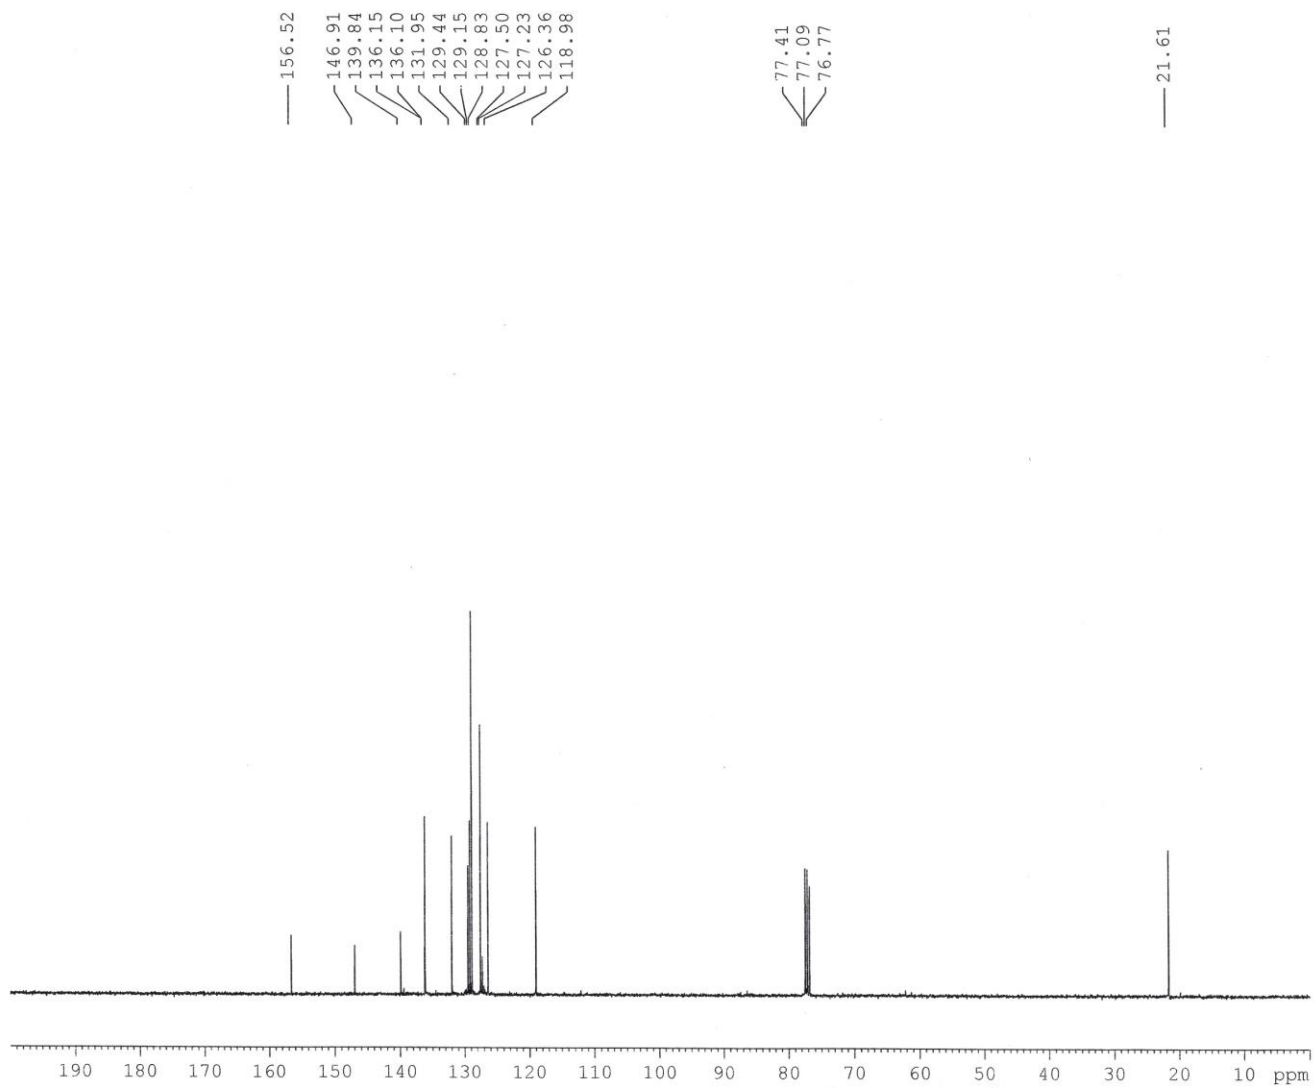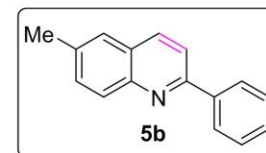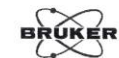

Current Data Parameters  
 NAME Dr. A MAJEE 2018  
 EXPNO 788  
 PROCNO 1

F2 - Acquisition Parameters  
 Date\_ 20181004  
 Time\_ 17.59  
 INSTRUM spect  
 PROBHD 5 mm PABBO BB/  
 PULPROG zgpg30  
 TD 32768  
 SOLVENT CDCl3  
 NS 180  
 DS 2  
 SWH 24038.461 Hz  
 FIDRES 0.733596 Hz  
 AQ 0.6815744 sec  
 RG 186.42  
 DW 20.800 usec  
 DE 6.50 usec  
 TE 300.0 K  
 D1 2.00000000 sec  
 D11 0.03000000 sec  
 TD0 1

===== CHANNEL f1 =====  
 SFO1 100.6278588 MHz  
 NUC1 13C  
 P1 8.90 usec  
 PLW1 54.00000000 W

===== CHANNEL f2 =====  
 SFO2 400.1516006 MHz  
 NUC2 1H  
 CPDPRG[2] waltz16  
 PCPD2 90.00 usec  
 PLW2 12.00000000 W  
 PLW12 0.32231000 W  
 PLW13 0.16212000 W

F2 - Processing parameters  
 SI 16384  
 SF 100.6177918 MHz  
 WDW EM  
 SSB 0  
 LB 1.00 Hz  
 GB 0  
 PC 2.00

<sup>1</sup>H of VBSSM 423/48

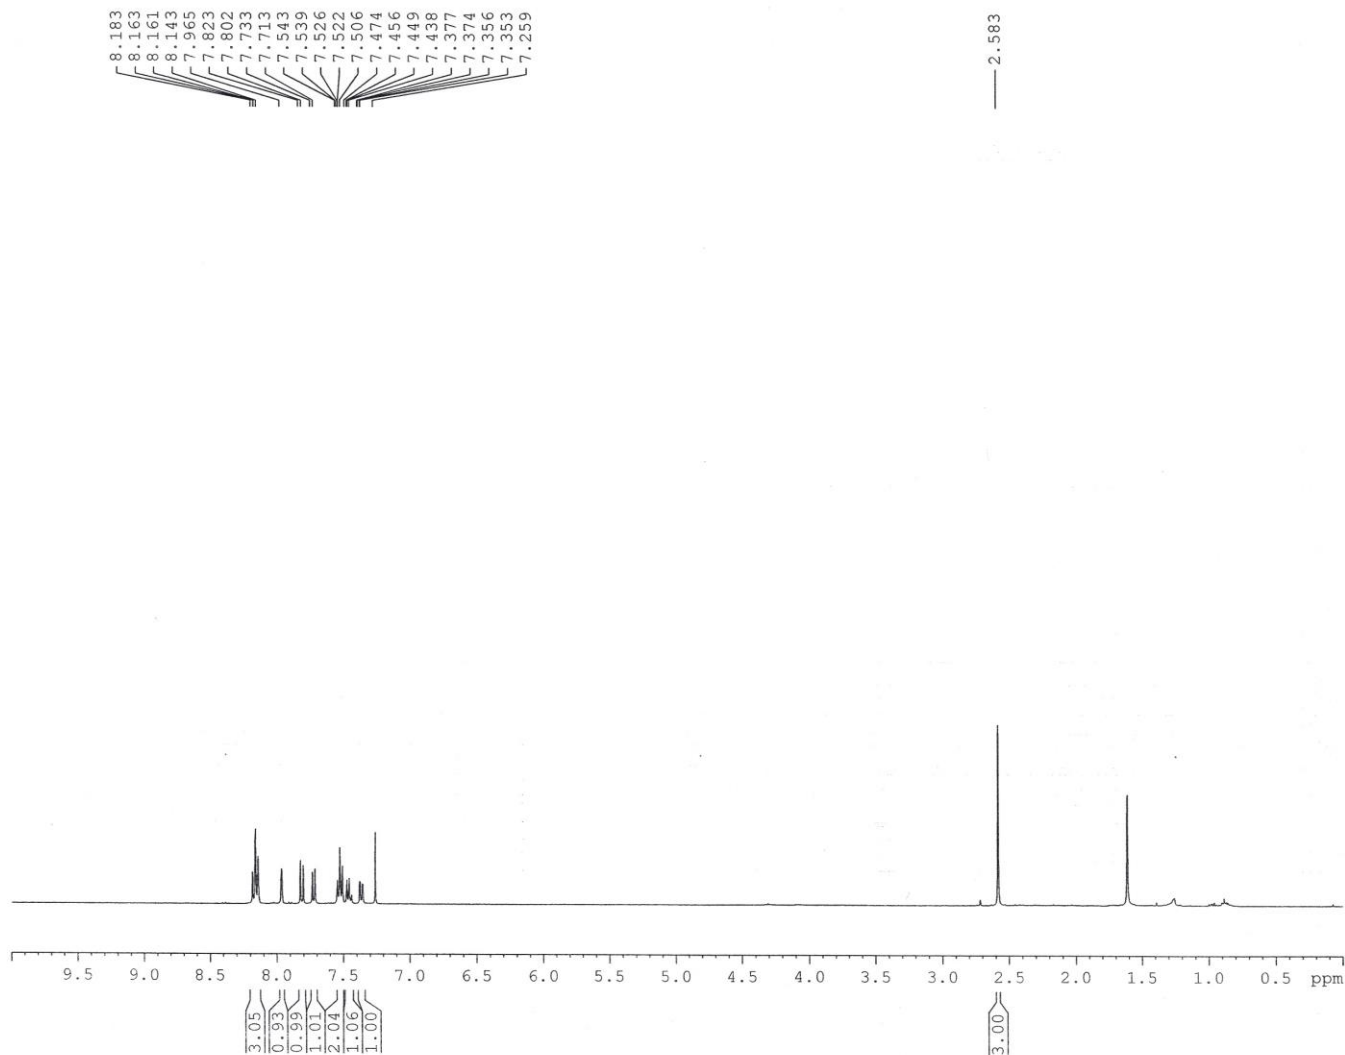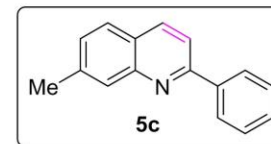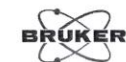

Current Data Parameters  
NAME Dr. A MAJEE 2018  
EXPNO 770  
PROCNO 1

F2 - Acquisition Parameters  
Date\_ 20180925  
Time 16.36  
INSTRUM spect  
PROBHD 5 mm PABBO BB/  
PULPROG zg30  
TD 32768  
SOLVENT CDCl3  
NS 10  
DS 1  
SWH 8223.685 Hz  
FIDRES 0.250967 Hz  
AQ 1.9922944 sec  
RG 148.91  
DW 60.800 usec  
DE 6.50 usec  
TE 298.9 K  
D1 1.00000000 sec  
TD0 1

==== CHANNEL f1 =====  
SF01 400.1524711 MHz  
NUC1 1H  
P1 14.75 usec  
PLW1 12.00000000 W

F2 - Processing parameters  
SI 16384  
SF 400.1500097 MHz  
WDW EM  
SSB 0  
LB 0.30 Hz  
GB 0  
PC 1.00

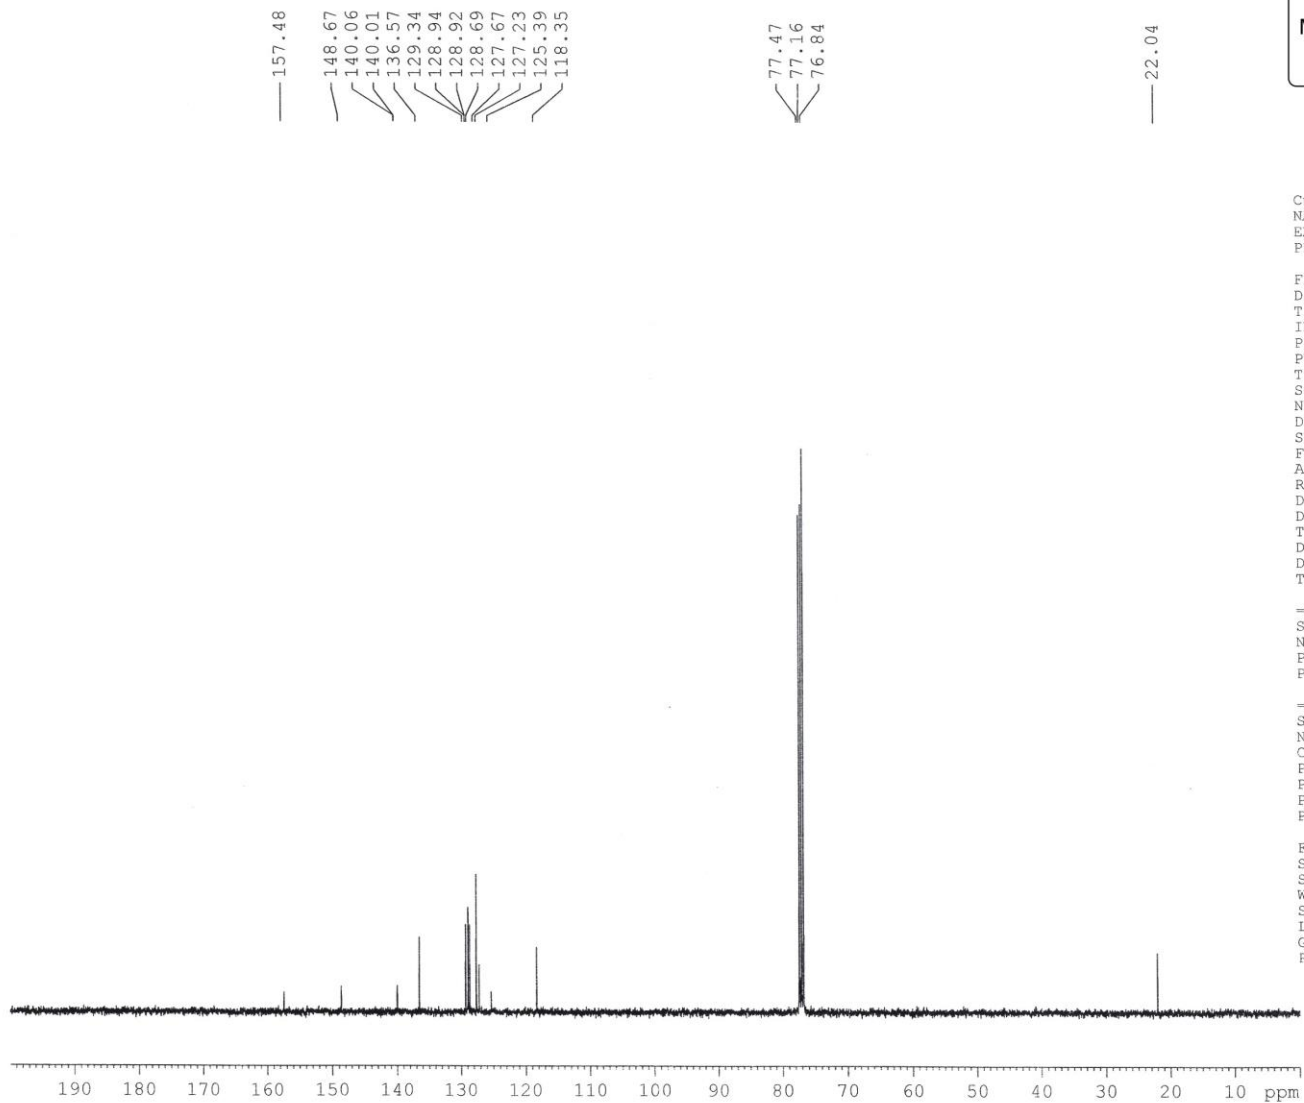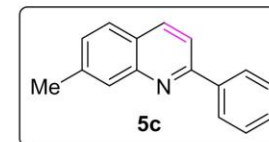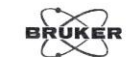

Current Data Parameters  
NAME Dr. A MAJEE 2018  
EXPNO 773  
PROCNO 1

F2 - Acquisition Parameters  
Date\_ 20180927  
Time\_ 20.21  
INSTRUM spect  
PROBHD 5 mm PABBO BB/  
PULPROG zgpg30  
TD 32768  
SOLVENT CDCl3  
NS 640  
DS 2  
SWH 24038.461 Hz  
FIDRES 0.733596 Hz  
AQ 0.6815744 sec  
RG 186.42  
DW 20.800 usec  
DE 6.50 usec  
TE 300.1 K  
D1 2.00000000 sec  
D11 0.03000000 sec  
TD0 1

===== CHANNEL f1 =====  
SFO1 100.6278588 MHz  
NUC1 13C  
P1 8.90 usec  
PLW1 54.00000000 W

===== CHANNEL f2 =====  
SFO2 400.1516006 MHz  
NUC2 1H  
CPDPRG[2] waltz16  
PCPD2 90.00 usec  
PLW2 12.00000000 W  
PLW12 0.32231000 W  
PLW13 0.16212000 W

F2 - Processing parameters  
SI 16384  
SF 100.6177834 MHz  
WDW EM  
SSB 0  
LB 1.00 Hz  
GB 0  
PC 2.00



<sup>1</sup>H of VBSMS-423/51

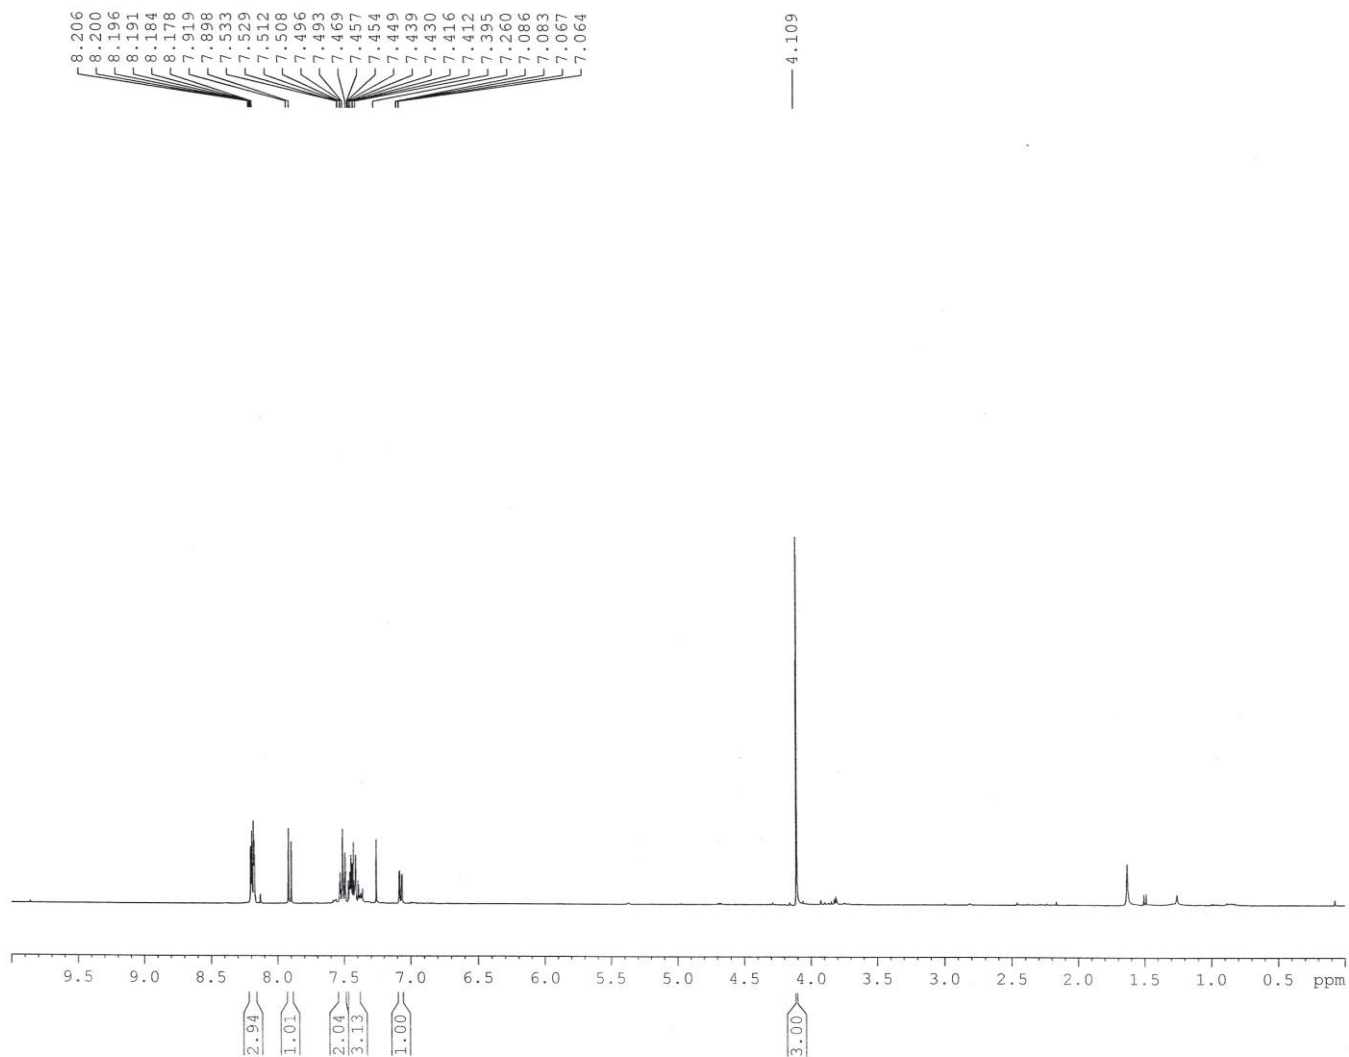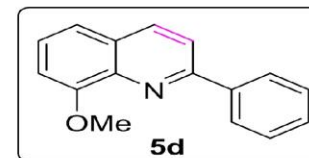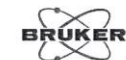

Current Data Parameters  
NAME Dr. A MAJEE 2018  
EXPNO 783  
PROCNO 1

F2 - Acquisition Parameters  
Date\_ 20181003  
Time 14.53  
INSTRUM spect  
PROBHD 5 mm PABBO BB/  
PULPROG zg30  
TD 32768  
SOLVENT CDCl3  
NS 12  
DS 1  
SWH 8223.685 Hz  
FIDRES 0.250967 Hz  
AQ 1.9922944 sec  
RG 120.16  
DW 60.800 usec  
DE 6.50 usec  
TE 297.7 K  
D1 1.00000000 sec  
TDO 1

===== CHANNEL f1 =====  
SF01 400.1524711 MHz  
NUC1 1H  
P1 14.75 usec  
PLW1 12.00000000 W

F2 - Processing parameters  
SI 16384  
SF 400.1500097 MHz  
WDW EM  
SSB 0  
LB 0.30 Hz  
GB 0  
PC 1.00

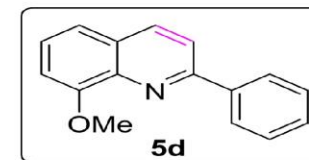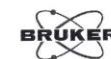

Current Data Parameters  
 NAME Dr. A MAJEE 2018  
 EXPNO 787  
 PROCNO 1

F2 - Acquisition Parameters  
 Date\_ 20181003  
 Time\_ 15.26  
 INSTRUM spect  
 PROBHD 5 mm PABBO BB/  
 PULPROG zgpg30  
 TD 32768  
 SOLVENT CDCl3  
 NS 480  
 DS 2  
 SWH 24038.461 Hz  
 FIDRES 0.733596 Hz  
 AQ 0.6815744 sec  
 RG 186.42  
 DW 20.800 usec  
 DE 6.50 usec  
 TE 298.4 K  
 D1 2.00000000 sec  
 D11 0.03000000 sec  
 TD0 1

===== CHANNEL f1 =====  
 SFO1 100.6278588 MHz  
 NUC1 13C  
 P1 8.90 usec  
 PLW1 54.00000000 W

===== CHANNEL f2 =====  
 SFO2 400.1516006 MHz  
 NUC2 1H  
 CPDPRG[2] waltz16  
 PCPD2 90.00 usec  
 PLW2 12.00000000 W  
 PLW12 0.32231000 W  
 PLW13 0.16212000 W

F2 - Processing parameters  
 SI 16384  
 SF 100.6177852 MHz  
 WDW EM  
 SSB 0  
 LB 1.00 Hz  
 GB 0  
 PC 2.00

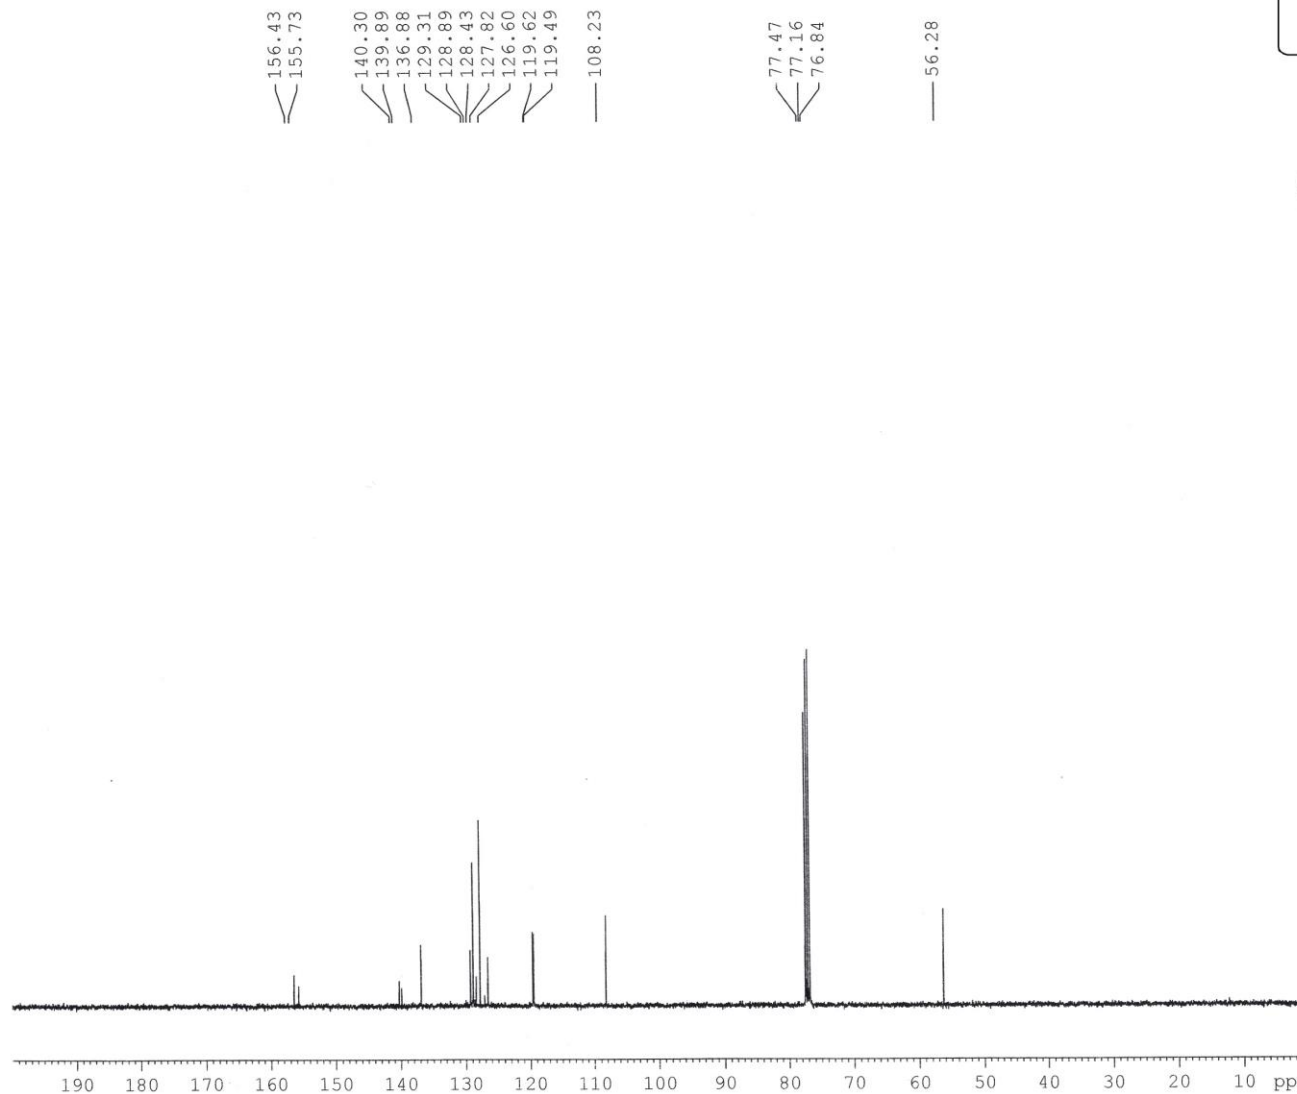

1H of VBSMS-423/50

8.185  
8.172  
8.164  
8.157  
8.153  
8.136  
7.910  
7.888  
7.553  
7.535  
7.516  
7.503  
7.496  
7.488  
7.485  
7.473  
7.470  
7.461  
7.453  
7.439  
7.431  
7.259

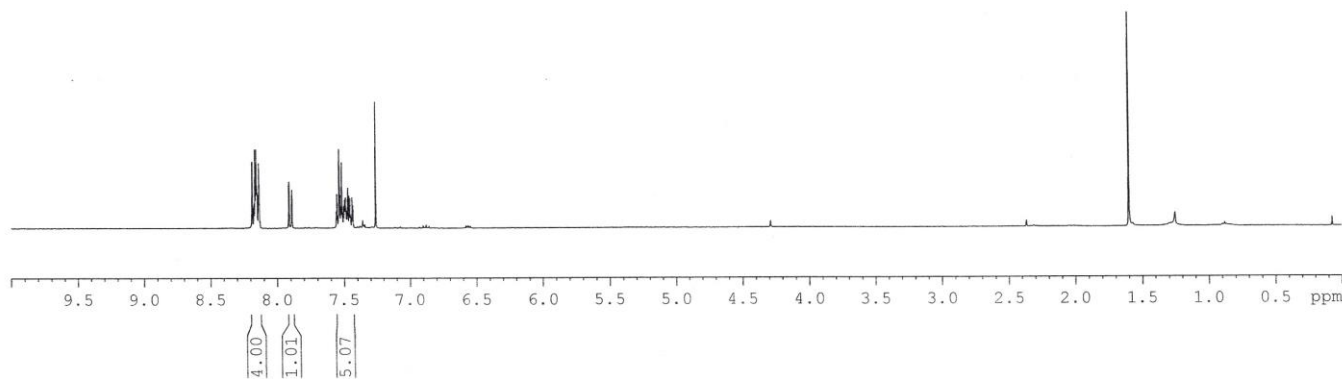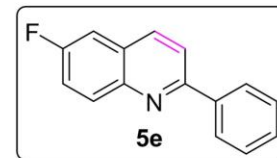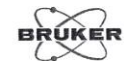

Current Data Parameters  
NAME Dr. A MAJEE 2018  
EXPNO 805  
PROCNO 1

F2 - Acquisition Parameters  
Date\_ 20181031  
Time 17.30  
INSTRUM spect  
PROBHD 5 mm PABBO BB/  
PULPROG zg30  
TD 32768  
SOLVENT CDC13  
NS 16  
DS 1  
SWH 8223.685 Hz  
FIDRES 0.250967 Hz  
AQ 1.9922944 sec  
RG 186.42  
DW 60.800 usec  
DE 6.50 usec  
TE 295.7 K  
D1 1.00000000 sec  
TD0 1

==== CHANNEL f1 =====  
SFO1 400.1524711 MHz  
NUC1 1H  
P1 14.75 usec  
PLW1 12.00000000 W

F2 - Processing parameters  
SI 16384  
SF 400.1500098 MHz  
WDW EM  
SSB 0  
LB 0.30 Hz  
GB 0  
PC 1.00

13C of VBSSM 423/50

161.73  
159.26  
156.91  
145.53  
139.52  
136.30  
136.25  
132.38  
132.28  
129.55  
129.04  
127.80  
127.58  
120.12  
119.87  
110.72  
110.50

77.47  
77.15  
76.84

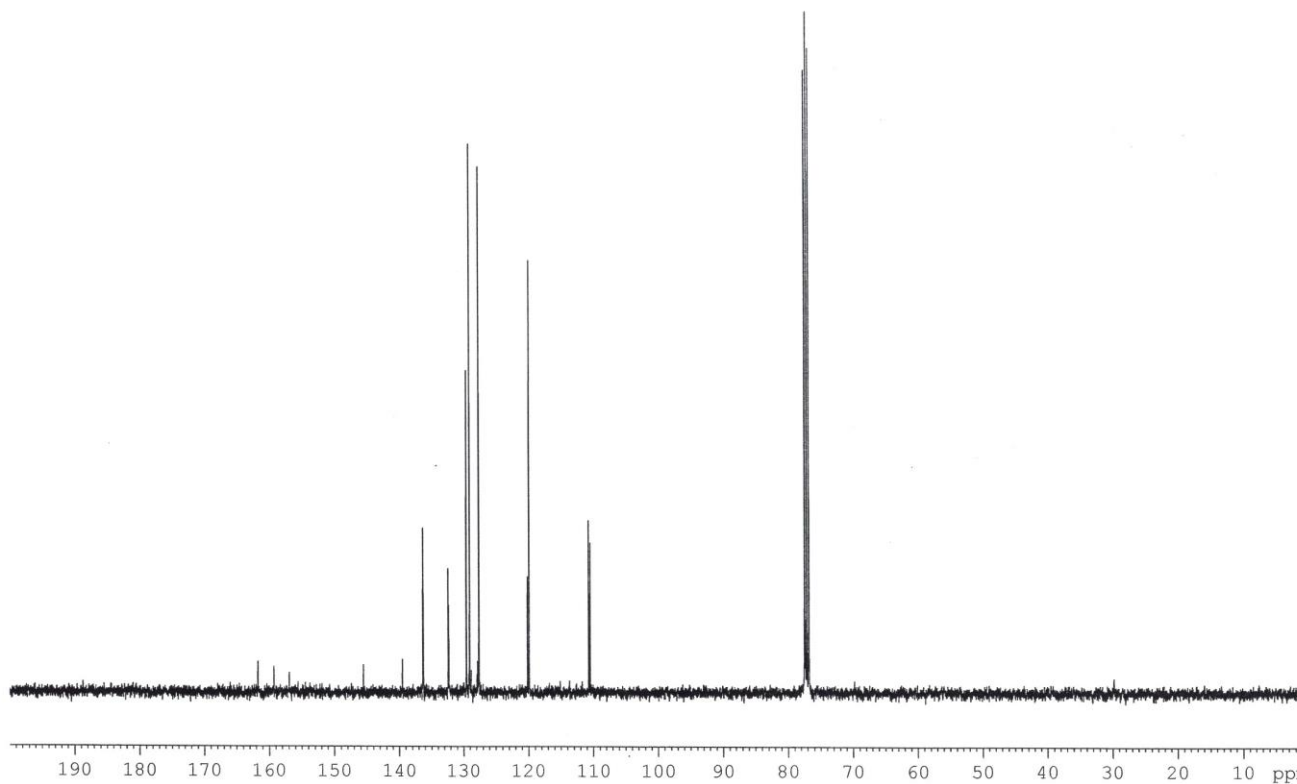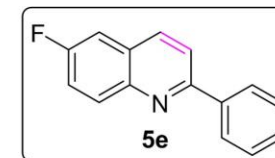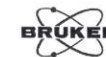

Current Data Parameters  
NAME Dr. A MAJEE 2018  
EXPNO 806  
PROCNO 1

F2 - Acquisition Parameters  
Date\_ 20181102  
Time 21.31  
INSTRUM spect  
PROBHD 5 mm PABBO BB/  
PULPROG zgdc  
TD 32768  
SOLVENT CDC13  
NS 2048  
DS 2  
SWH 24038.461 Hz  
FIDRES 0.733596 Hz  
AQ 0.6815744 sec  
RG 186.42  
DW 20.800 usec  
DE 6.50 usec  
TE 297.3 K  
D1 2.00000000 sec  
D11 0.03000000 sec  
TD0 1

===== CHANNEL f1 =====  
SFO1 100.6278588 MHz  
NUC1 13C  
P1 8.90 usec  
PLW1 54.00000000 W

===== CHANNEL f2 =====  
SFO2 400.1516006 MHz  
NUC2 1H  
CPDPRG2 waltz16  
PCPD2 90.00 usec  
PLW2 12.00000000 W  
PLW12 0.32231000 W

F2 - Processing parameters  
SI 16384  
SF 100.6177841 MHz  
WDW EM  
SSB 0  
LB 1.00 Hz  
GB 0  
PC 2.00

1H of VBSSM 423/10

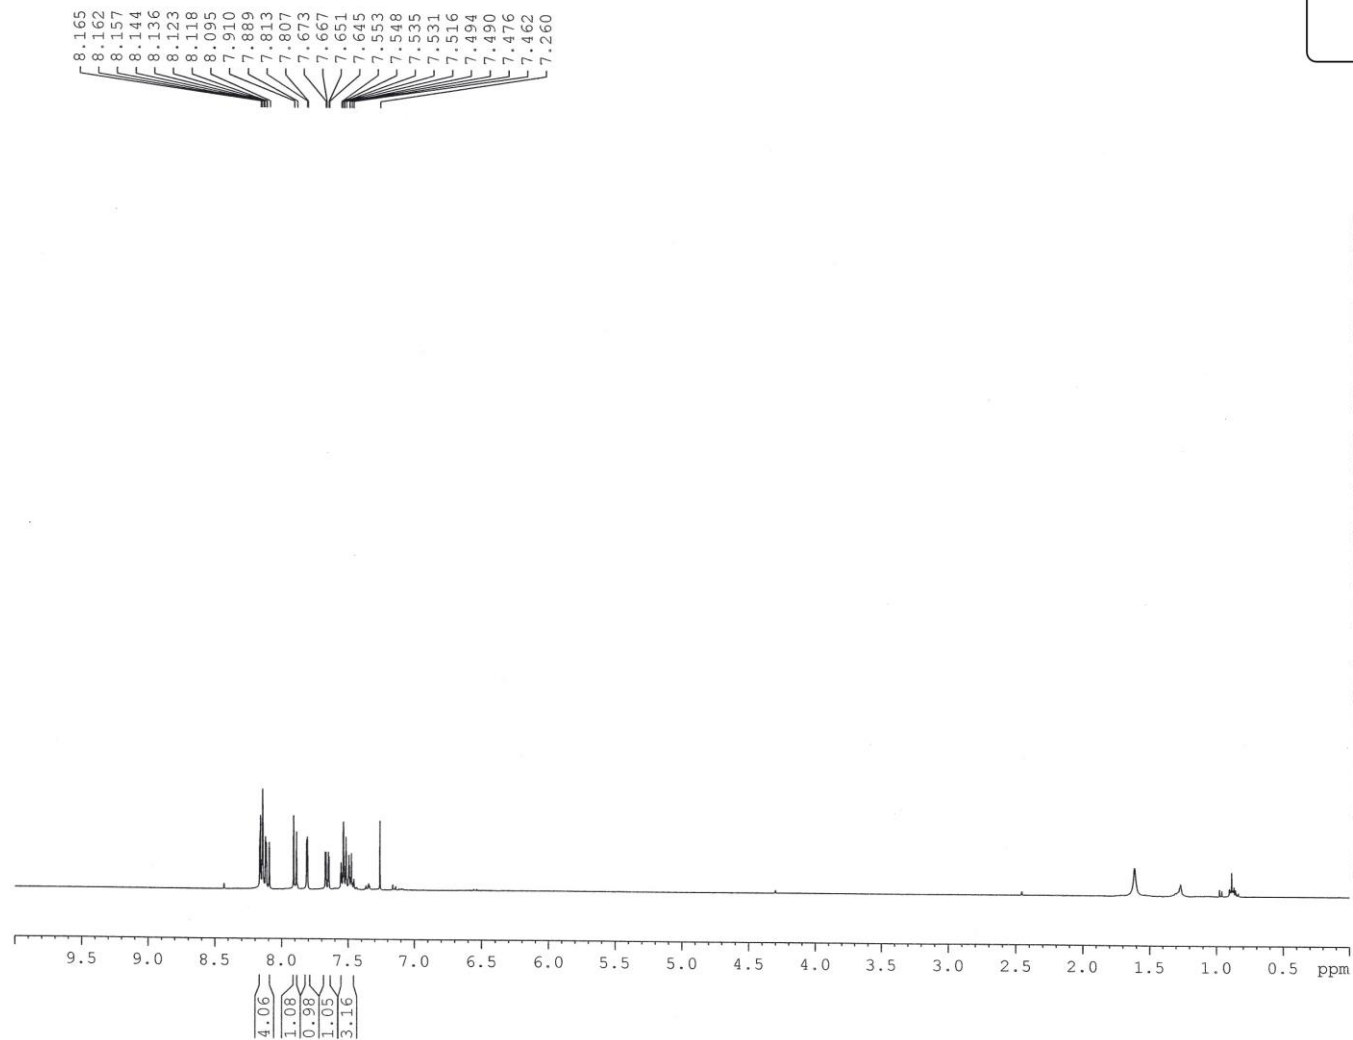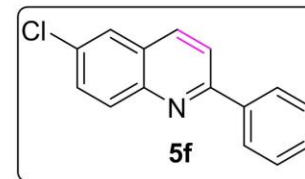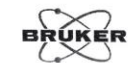

Current Data Parameters  
NAME Dr. A MAJEE 2018  
EXPNO 538  
PROCNO 1

F2 - Acquisition Parameters  
Date\_ 20180706  
Time 20.27  
INSTRUM spect  
PROBHD 5 mm PABBO BB/  
PULPROG zg30  
TD 32768  
SOLVENT CDCl3  
NS 16  
DS 1  
SWH 8223.685 Hz  
FIDRES 0.250967 Hz  
AQ 1.9922944 sec  
RG 120.16  
DW 60.800 usec  
DE 6.50 usec  
TE 300.2 K  
D1 1.00000000 sec  
TDO 1

----- CHANNEL f1 -----  
SFO1 400.1524711 MHz  
NUC1 1H  
P1 14.75 usec  
PLW1 12.00000000 W

F2 - Processing parameters  
SI 16384  
SF 400.1500096 MHz  
WDW EM  
SSB 0  
LB 0.30 Hz  
GB 0  
PC 1.00

157.73  
 146.82  
 139.37  
 135.98  
 132.06  
 131.49  
 130.72  
 129.72  
 129.05  
 127.88  
 127.66  
 126.28  
 119.95

77.47  
 77.16  
 76.84

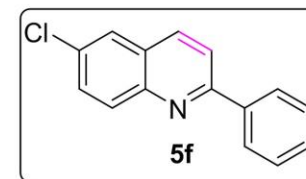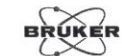

Current Data Parameters  
 NAME Dr. A MAJEE 2018  
 EXPNO 547  
 PROCNO 1

F2 - Acquisition Parameters  
 Date\_ 20180706  
 Time\_ 20.59  
 INSTRUM spect  
 PROBHD 5 mm PABBO BB/  
 PULPROG zgpg30  
 TD 32768  
 SOLVENT CDCl3  
 NS 640  
 DS 2  
 SWH 24038.461 Hz  
 FIDRES 0.733596 Hz  
 AQ 0.6815744 sec  
 RG 77.59  
 DW 20.800 usec  
 DE 6.50 usec  
 TE 301.1 K  
 D1 2.00000000 sec  
 D11 0.03000000 sec  
 TD0 1

===== CHANNEL f1 =====  
 SFO1 100.6278588 MHz  
 NUC1 13C  
 P1 8.90 usec  
 PLW1 54.00000000 W

===== CHANNEL f2 =====  
 SFO2 400.1516006 MHz  
 NUC2 1H  
 CPDPRG[2] waltz16  
 PCPD2 90.00 usec  
 PLW2 12.00000000 W  
 PLW12 0.32231000 W  
 PLW13 0.16212000 W

F2 - Processing parameters  
 SI 16384  
 SF 100.6177833 MHz  
 WDW EM  
 SSB 0  
 LB 1.00 Hz  
 GB 0  
 PC 2.00

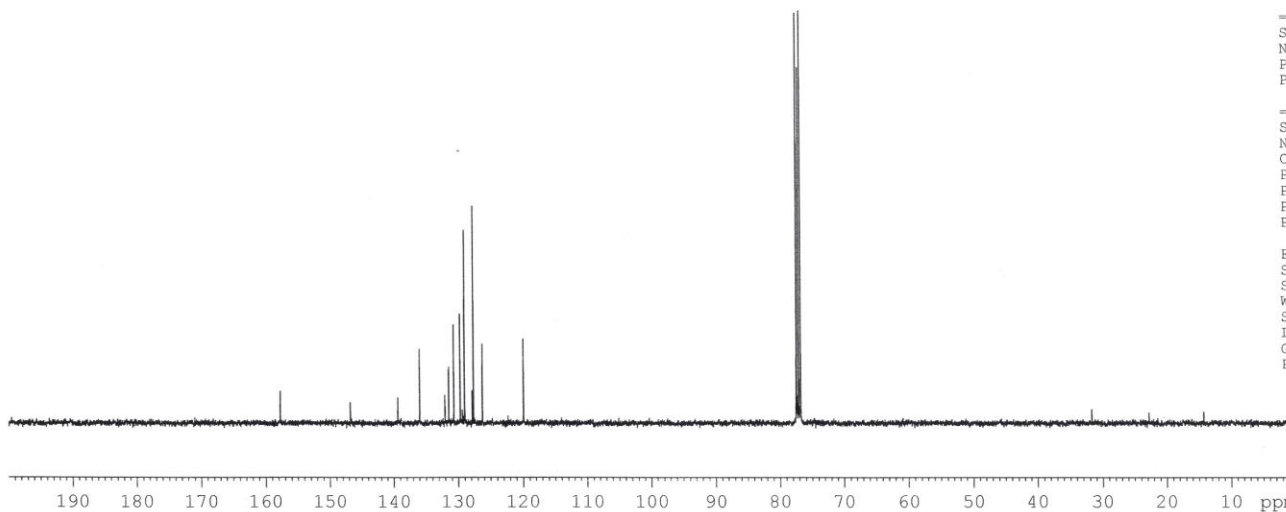

<sup>1</sup>H of VBSSM-423/62

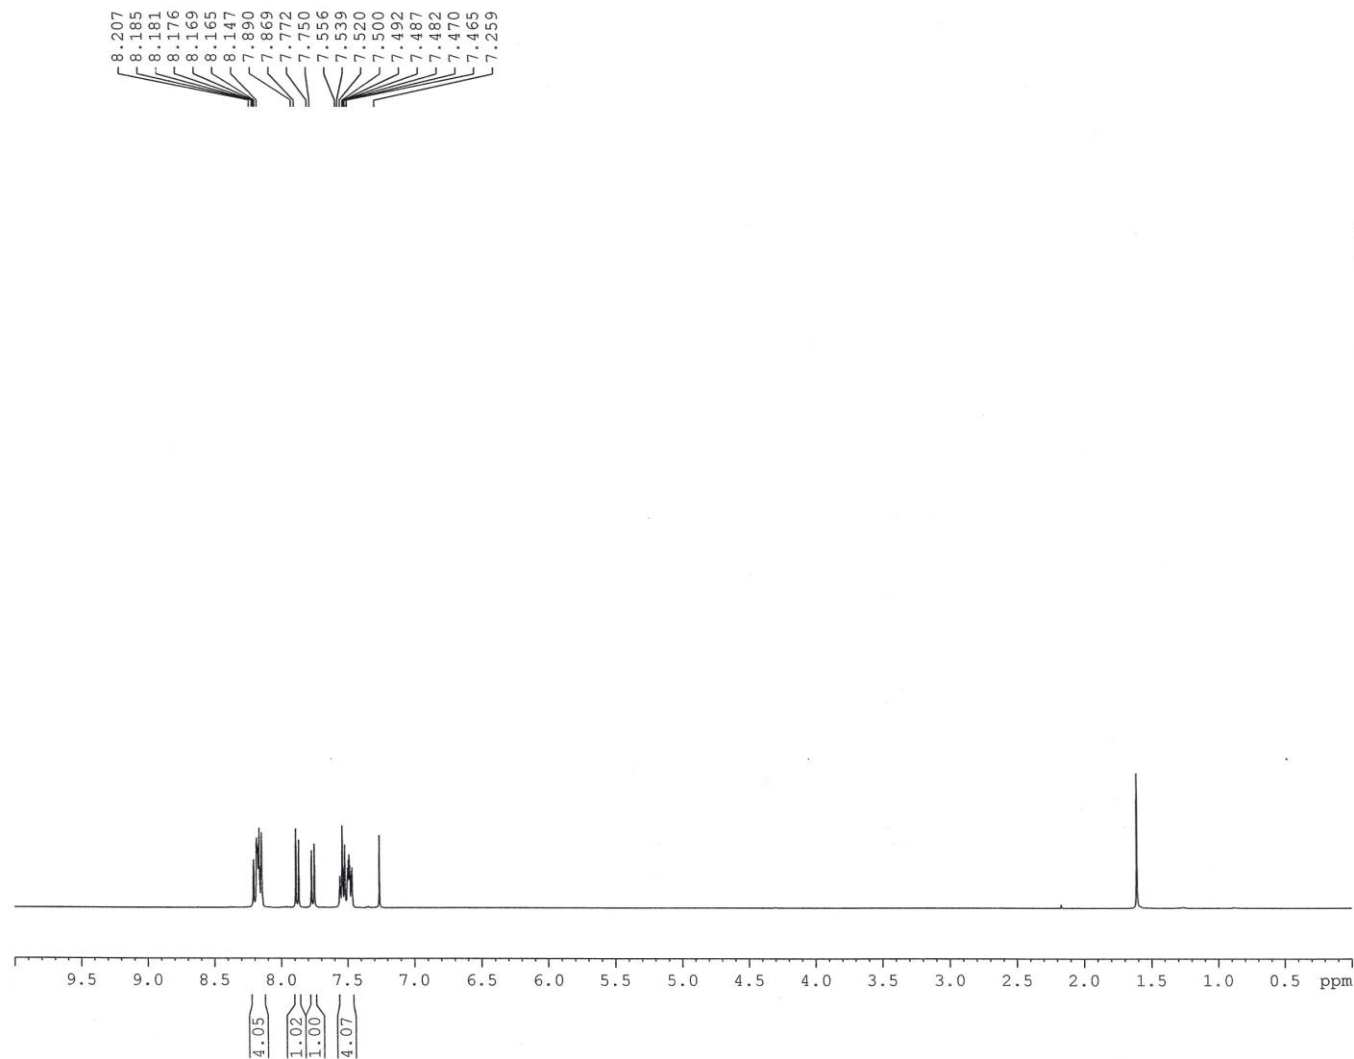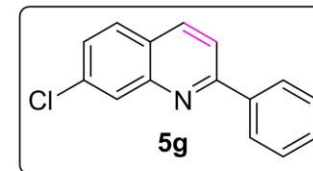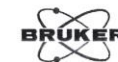

Current Data Parameters  
NAME Dr. A MAJEE 2018  
EXPNO 840  
PROCNO 1

F2 - Acquisition Parameters  
Date\_ 20181127  
Time 15.25  
INSTRUM spect  
PROBHD 5 mm PABBO BB/  
PULPROG zg30  
TD 32768  
SOLVENT CDCl3  
NS 12  
DS 1  
SWH 8223.685 Hz  
FIDRES 0.250967 Hz  
AQ 1.9922944 sec  
RG 168.31  
DW 60.800 usec  
DE 6.50 usec  
TE 295.3 K  
D1 1.00000000 sec  
TD0 1

===== CHANNEL f1 =====  
SF01 400.1524711 MHz  
NUC1 1H  
P1 14.75 usec  
PLW1 12.00000000 W

F2 - Processing parameters  
SI 16384  
SF 400.1500098 MHz  
WDW EM  
SSB 0  
LB 0.30 Hz  
GB 0  
PC 1.00

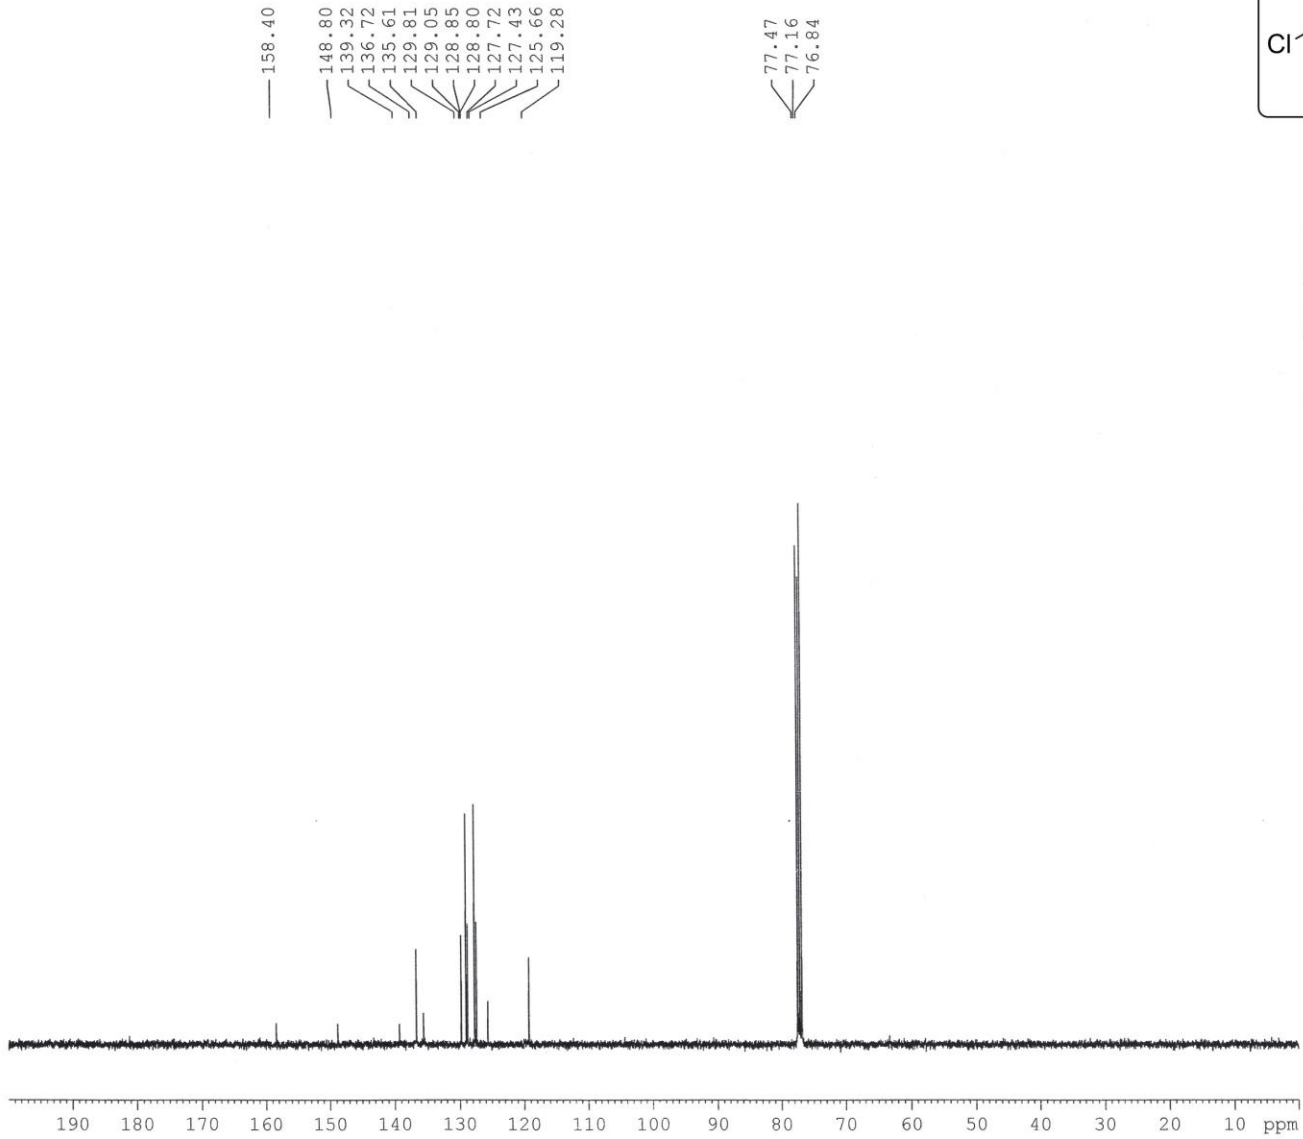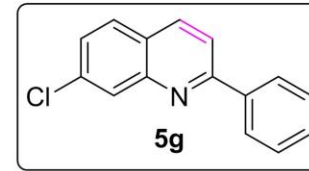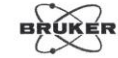

Current Data Parameters  
 NAME Dr. A MAJEE 2018  
 EXPNO 841  
 PROCNO 1

F2 - Acquisition Parameters  
 Date\_ 20181127  
 Time 15.53  
 INSTRUM spect  
 PROBHD 5 mm PABBO BB/  
 PULPROG zgpg30  
 TD 32768  
 SOLVENT CDCl3  
 NS 480  
 DS 2  
 SWH 24038.461 Hz  
 FIDRES 0.733596 Hz  
 AQ 0.6815744 sec  
 RG 186.42  
 DW 20.800 usec  
 DE 6.50 usec  
 TE 296.2 K  
 D1 2.00000000 sec  
 D11 0.03000000 sec  
 TDO 1

----- CHANNEL f1 -----  
 SFO1 100.6278588 MHz  
 NUC1 13C  
 P1 8.90 usec  
 PLW1 54.00000000 W

----- CHANNEL f2 -----  
 SFO2 400.1516006 MHz  
 NUC2 1H  
 CPDPRG(2) waltz16  
 PCPD2 90.00 usec  
 PLW2 12.00000000 W  
 PLW12 0.32231000 W  
 PLW13 0.16212000 W

F2 - Processing parameters  
 SI 16384  
 SF 100.6177845 MHz  
 WDW EM  
 LB 0 1.00 Hz  
 GB 0  
 PC 2.00



1H of VBSSM-423/63

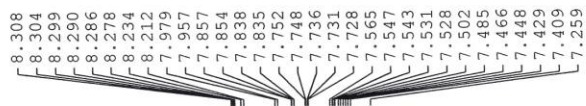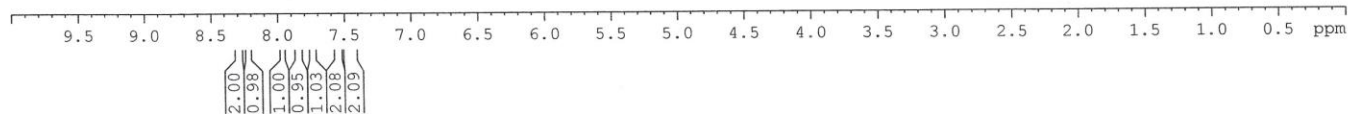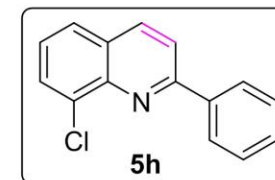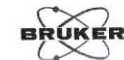

Current Data Parameters  
NAME Dr. A MAJEE 2018  
EXPNO 842  
PROCNO 1

F2 - Acquisition Parameters  
Date\_ 20181127  
Time\_ 20.47  
INSTRUM spect  
PROBHD 5 mm PABBO BB/  
PULPROG zg30  
TD 32768  
SOLVENT CDCl3  
NS 12  
DS 1  
SWH 8223.685 Hz  
FIDRES 0.250967 Hz  
AQ 1.9922944 sec  
RG 168.31  
DW 60.800 usec  
DE 6.50 usec  
TE 295.8 K  
D1 1.00000000 sec  
TD0 1

===== CHANNEL f1 =====  
SFO1 400.1524711 MHz  
NUC1 1H  
P1 14.75 usec  
PLW1 12.00000000 W

F2 - Processing parameters  
SI 16384  
SF 400.1500099 MHz  
WDW EM  
SSB 0  
LB 0.30 Hz  
GB 0  
PC 1.00

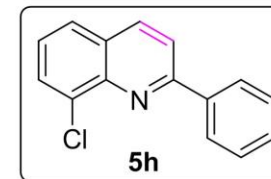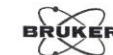

Current Data Parameters  
 NAME Dr. A MAJEE 2018  
 EXPNO 843  
 PROCNO 1

F2 - Acquisition Parameters  
 Date 20181127  
 Time 20.45  
 INSTRUM spect  
 PROBHD 5 mm PABBO BB/  
 PULPROG zgpg30  
 TD 32768  
 SOLVENT CDCl3  
 NS 180  
 DS 2  
 SWH 24038.461 Hz  
 FIDRES 0.733596 Hz  
 AQ 0.6815744 sec  
 RG 186.42  
 DW 20.800 usec  
 DE 6.50 usec  
 TE 296.3 K  
 D1 2.00000000 sec  
 D11 0.03000000 sec  
 TD0 1

===== CHANNEL f1 =====  
 SFO1 100.6278588 MHz  
 NUC1 13C  
 P1 8.90 usec  
 PLW1 54.00000000 W

===== CHANNEL f2 =====  
 SFO2 400.1516006 MHz  
 NUC2 1H  
 CPDPRG[2] waltz16  
 PCPD2 90.00 usec  
 PLW2 12.00000000 W  
 PLW12 0.32231000 W  
 PLW13 0.16212000 W

F2 - Processing parameters  
 SI 16384  
 SF 100.6177875 MHz  
 WDW EM  
 SSB 0  
 LB 1.00 Hz  
 GB 0  
 PC 2.00

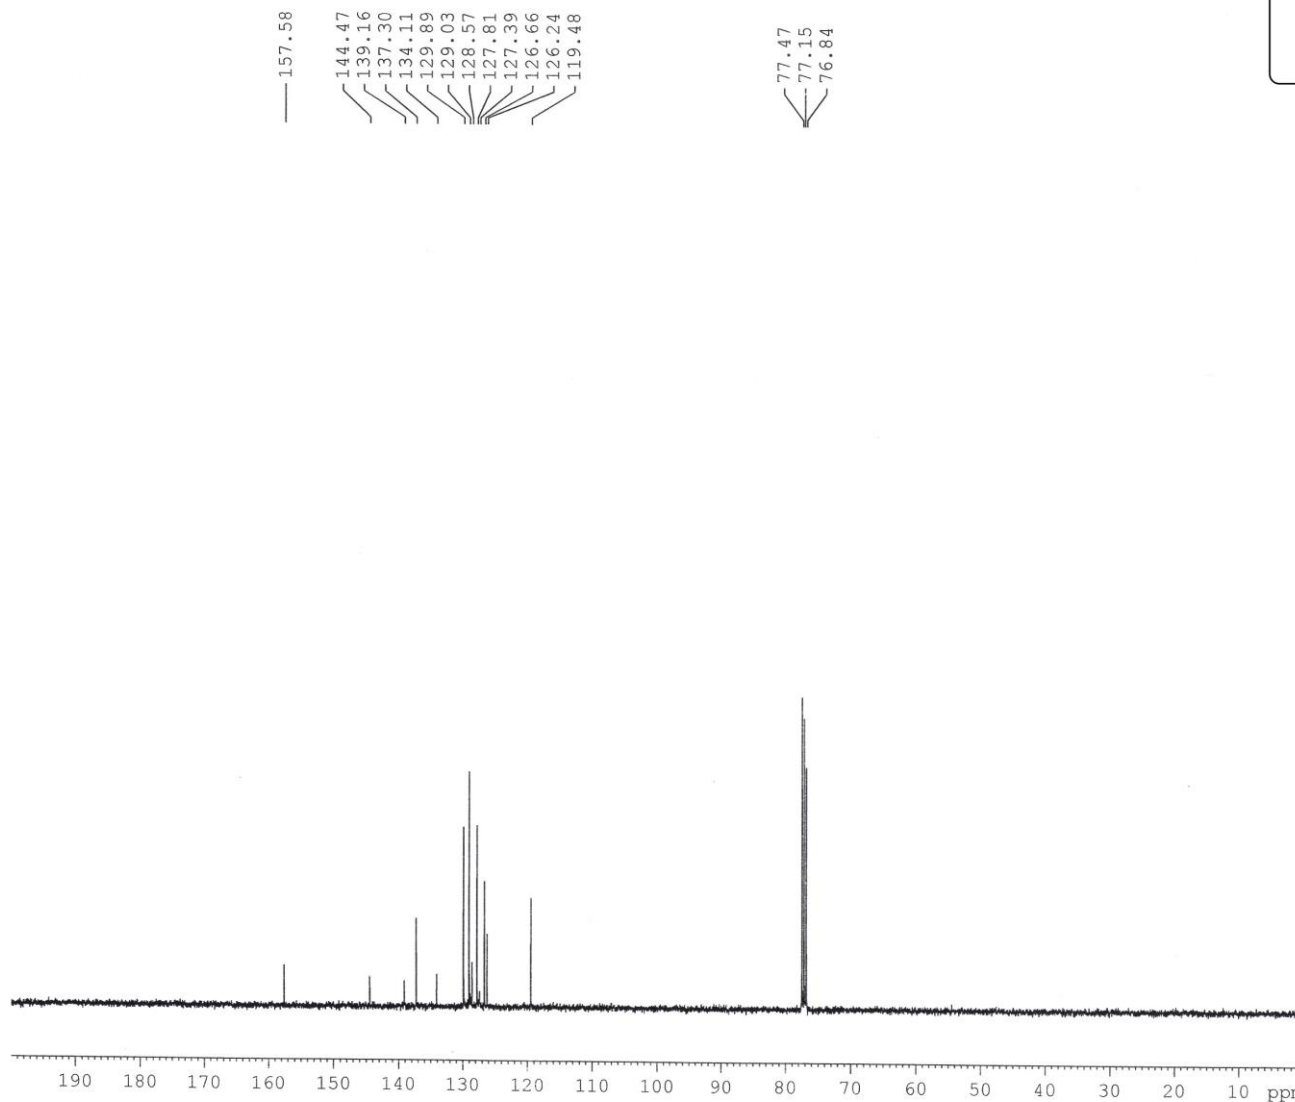

1H of VBSMS-423/49

8.165  
8.161  
8.144  
8.117  
8.095  
8.045  
8.023  
7.976  
7.970  
7.892  
7.870  
7.797  
7.791  
7.774  
7.769  
7.552  
7.547  
7.534  
7.515  
7.496  
7.484  
7.478  
7.460  
7.260

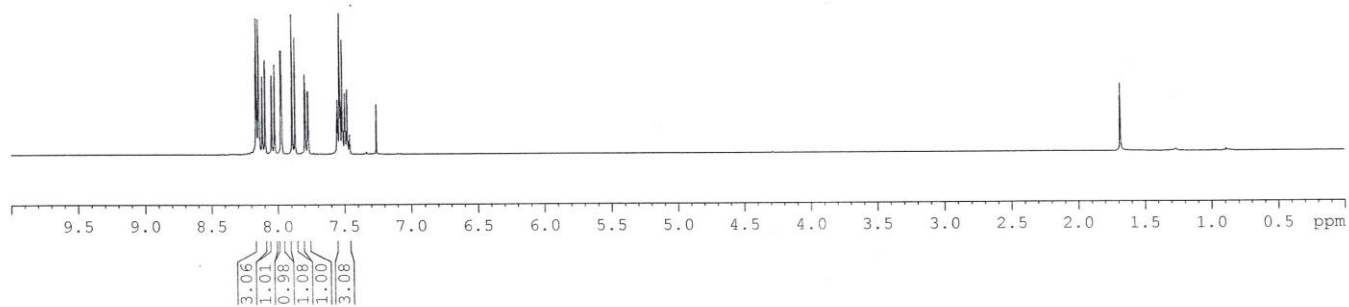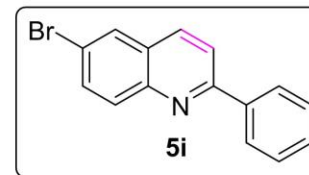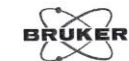

Current Data Parameters  
NAME Dr. A MAJEE 2018  
EXPNO 800  
PROCNO 1

F2 - Acquisition Parameters  
Date\_ 20181009  
Time 20.12  
INSTRUM spect  
PROBHD 5 mm PABBO BB/  
PULPROG zg30  
TD 32768  
SOLVENT CDCl3  
NS 12  
DS 1  
SWH 8223.685 Hz  
FIDRES 0.250967 Hz  
AQ 1.9922944 sec  
RG 93.46  
DW 60.800 usec  
DE 6.50 usec  
TE 299.0 K  
D1 1.00000000 sec  
TD0 1

===== CHANNEL f1 =====  
SFO1 400.1524711 MHz  
NUC1 1H  
P1 14.75 usec  
PLW1 12.00000000 W

F2 - Processing parameters  
SI 16384  
SF 400.1500096 MHz  
WDW EM  
SSB 0  
LB 0.30 Hz  
GB 0  
PC 1.00

13C of VBSSM 423/49

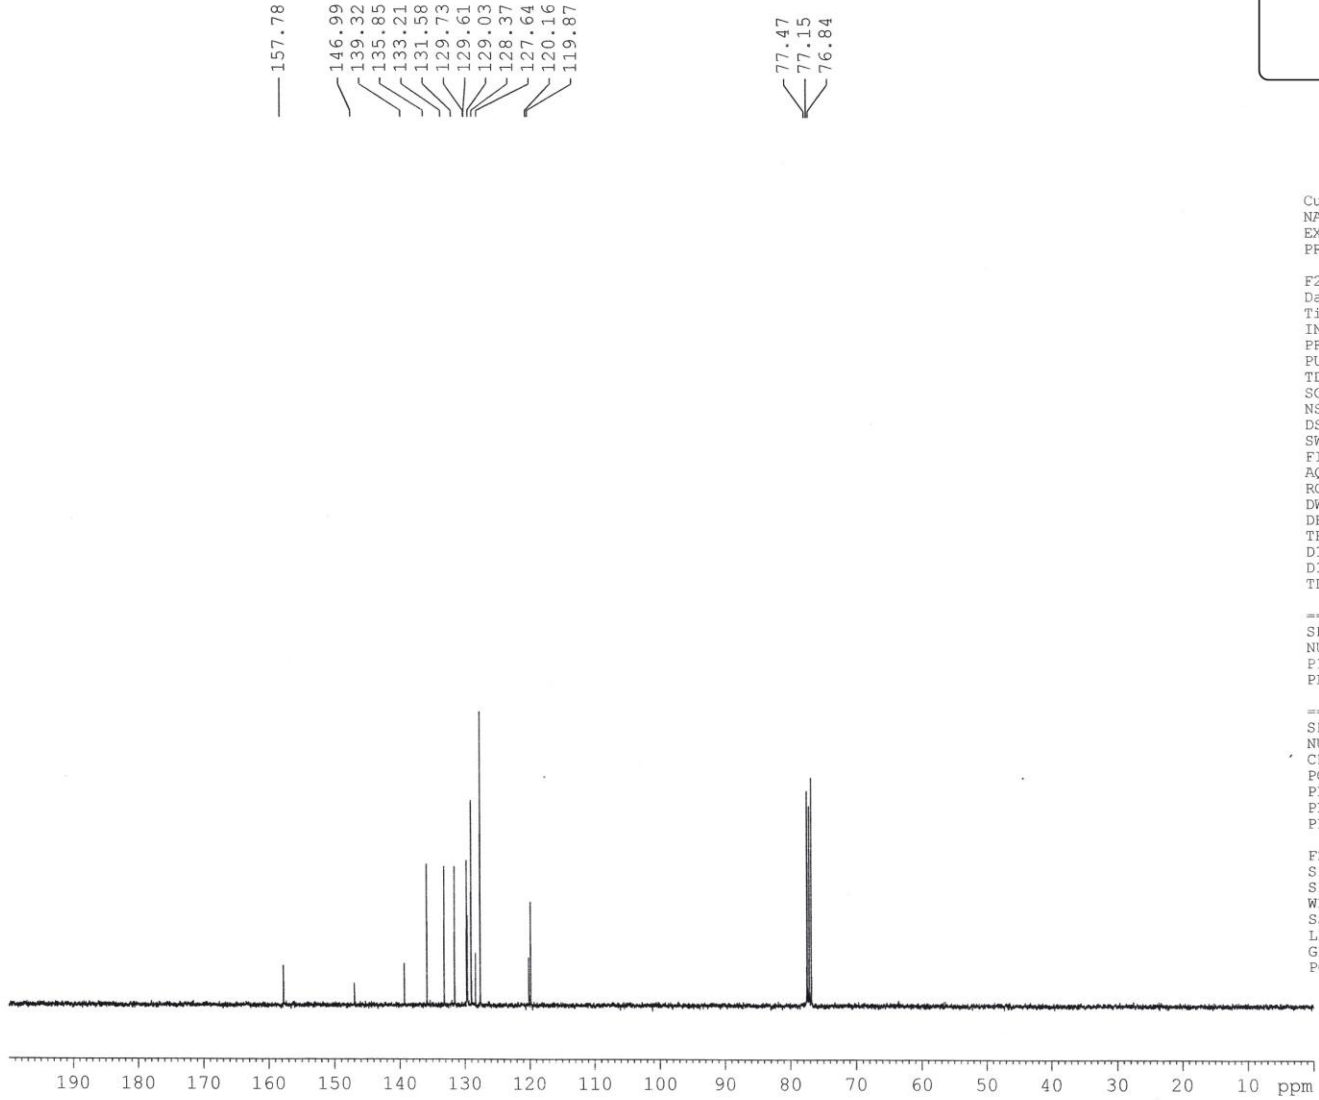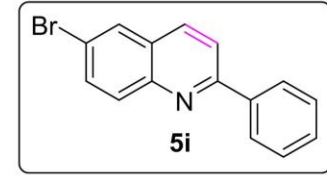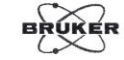

Current Data Parameters  
NAME Dr. A MAJEE 2018  
EXPNO 801  
PROCNO 1

F2 - Acquisition Parameters  
Date\_ 20181009  
Time 20.24  
INSTRUM spect  
PROBHD 5 mm PABBO BB/  
PULPROG zgpg30  
TD 32768  
SOLVENT CDCl3  
NS 220  
DS 2  
SWH 24038.461 Hz  
FIDRES 0.733596 Hz  
AQ 0.6815744 sec  
RG 186.42  
DW 20.800 usec  
DE 6.50 usec  
TE 299.6 K  
D1 2.00000000 sec  
D11 0.03000000 sec  
TD0 1

----- CHANNEL f1 -----  
SFO1 100.6278588 MHz  
NUC1 13C  
P1 8.90 usec  
PLW1 54.00000000 W

----- CHANNEL f2 -----  
SFO2 400.1516006 MHz  
NUC2 1H  
CPDPRG[2] waltz16  
PCPD2 90.00 usec  
PLW2 12.00000000 W  
PLW12 0.32231000 W  
PLW13 0.16212000 W

F2 - Processing parameters  
SI 16384  
SF 100.6177867 MHz  
WDW EM  
SSB 0  
LB 1.00 Hz  
GB 0  
PC 2.00

1H of VBSMS-423/56

8.226  
8.212  
8.204  
8.191  
8.188  
8.182  
8.177  
8.172  
8.168  
8.162  
7.976  
7.954  
7.838  
7.833  
7.816  
7.811  
7.568  
7.562  
7.546  
7.527  
7.523  
7.506  
7.488  
7.260

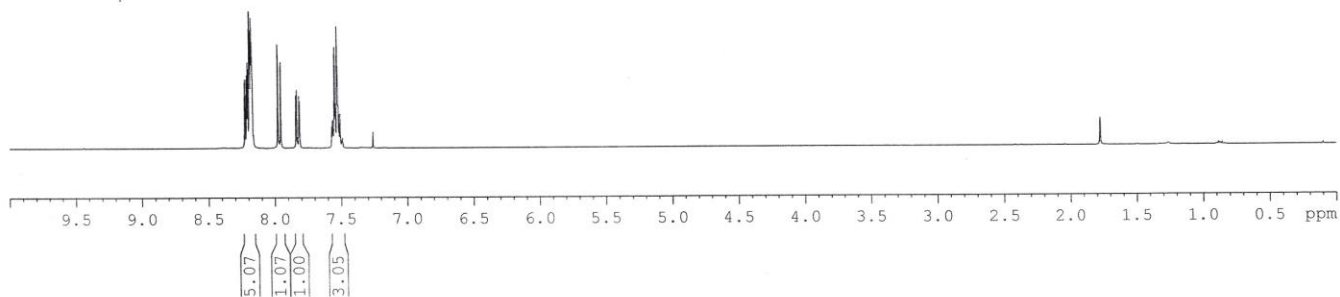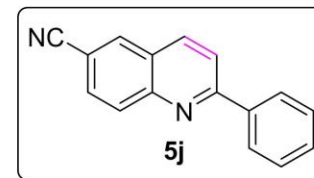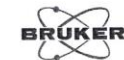

Current Data Parameters  
NAME Dr. A MAJEE 2018  
EXPNO 824  
PROCNO 1

F2 - Acquisition Parameters  
Date\_ 20181117  
Time 9.17  
INSTRUM spect  
PROBHD 5 mm PABBO BB/  
PULPROG zg30  
TD 32768  
SOLVENT CDCl3  
NS 12  
DS 1  
SWH 8223.685 Hz  
FIDRES 0.250967 Hz  
AQ 1.9922944 sec  
RG 67.81  
DW 60.800 usec  
DE 6.50 usec  
TE 301.3 K  
D1 1.00000000 sec  
TD0 1

===== CHANNEL f1 =====  
SF01 400.1524711 MHz  
NUC1 1H  
P1 14.75 usec  
PLW1 12.00000000 W

F2 - Processing parameters  
SI 16384  
SF 400.1500095 MHz  
WDW EM  
SSB 0  
LB 0.30 Hz  
GB 0  
PC 1.00

160.03  
 149.29  
 138.60  
 137.05  
 133.77  
 131.19  
 130.42  
 130.37  
 129.09  
 127.81  
 126.49  
 120.49  
 118.80  
 109.78

77.47  
 77.15  
 76.83

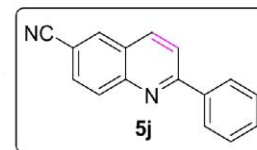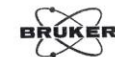

Current Data Parameters  
 NAME Dr. A MAJEE 2018  
 EXPNO 825  
 PROCNO 1

F2 - Acquisition Parameters  
 Date\_ 20181117  
 Time 9.28  
 INSTRUM spect  
 PROBHD 5 mm PABBO BB/  
 PULPROG zgpg30  
 TD 32768  
 SOLVENT CDCl3  
 NS 220  
 DS 2  
 SWH 24038.461 Hz  
 FIDRES 0.733596 Hz  
 AQ 0.6815744 sec  
 RG 186.42  
 DW 20.800 usec  
 DE 6.50 usec  
 TE 301.4 K  
 D1 2.00000000 sec  
 D11 0.03000000 sec  
 TD0 1

===== CHANNEL f1 =====  
 SFO1 100.6278588 MHz  
 NUC1 13C  
 P1 8.90 usec  
 PLW1 54.00000000 W

===== CHANNEL f2 =====  
 SFO2 400.1516006 MHz  
 NUC2 1H  
 CPDPRG[2] waltz16  
 PCPD2 90.00 usec  
 PLW2 12.00000000 W  
 PLW12 0.32231000 W  
 PLW13 0.16212000 W

F2 - Processing parameters  
 SI 16384  
 SF 100.6177919 MHz  
 WDW EM  
 SSB 0  
 LB 1.00 Hz  
 GB 0  
 PC 2.00

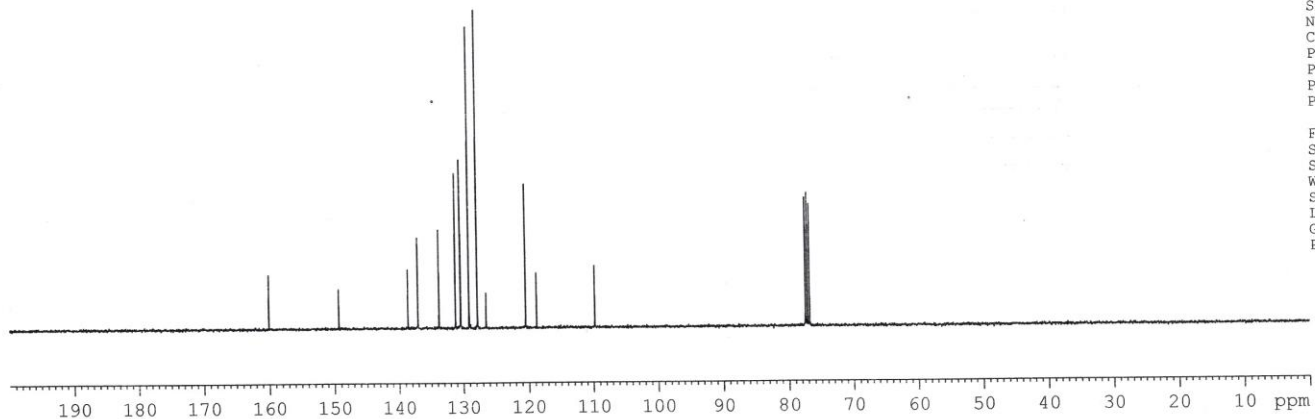

1H of VBSSM-423/58

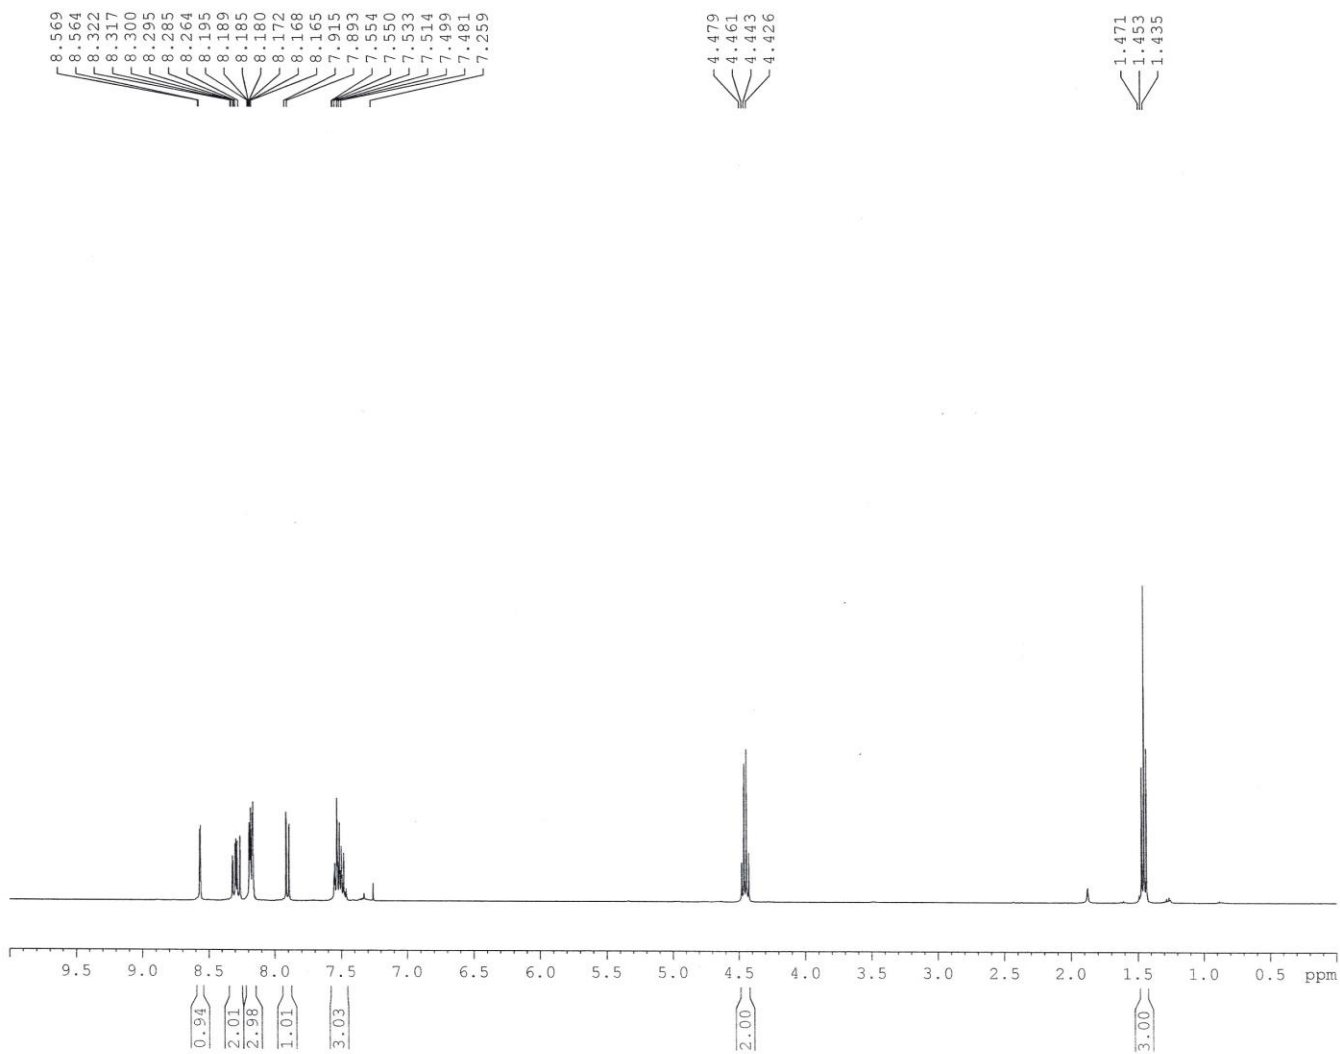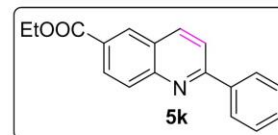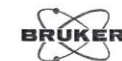

Current Data Parameters  
NAME Dr. A MAJEE 2018  
EXPNO 828  
PROCNO 1

F2 - Acquisition Parameters  
Date\_ 20181119  
Time\_ 20.42  
INSTRUM spect  
PROBHD 5 mm PABBO BB/  
PULPROG zg30  
TD 32768  
SOLVENT CDC13  
NS 12  
DS 1  
SWH 8223.685 Hz  
FIDRES 0.250967 Hz  
AQ 1.9922944 sec  
RG 67.81  
DW 60.800 usec  
DE 6.50 usec  
TE 296.6 K  
D1 1.00000000 sec  
TD0 1

===== CHANNEL f1 =====  
SF01 400.1524711 MHz  
NUC1 1H  
P1 14.75 usec  
PLW1 12.00000000 W

F2 - Processing parameters  
SI 16384  
SF 400.1500097 MHz  
WDW EM  
SSB 0  
LB 0.30 Hz  
GB 0  
PC 1.00

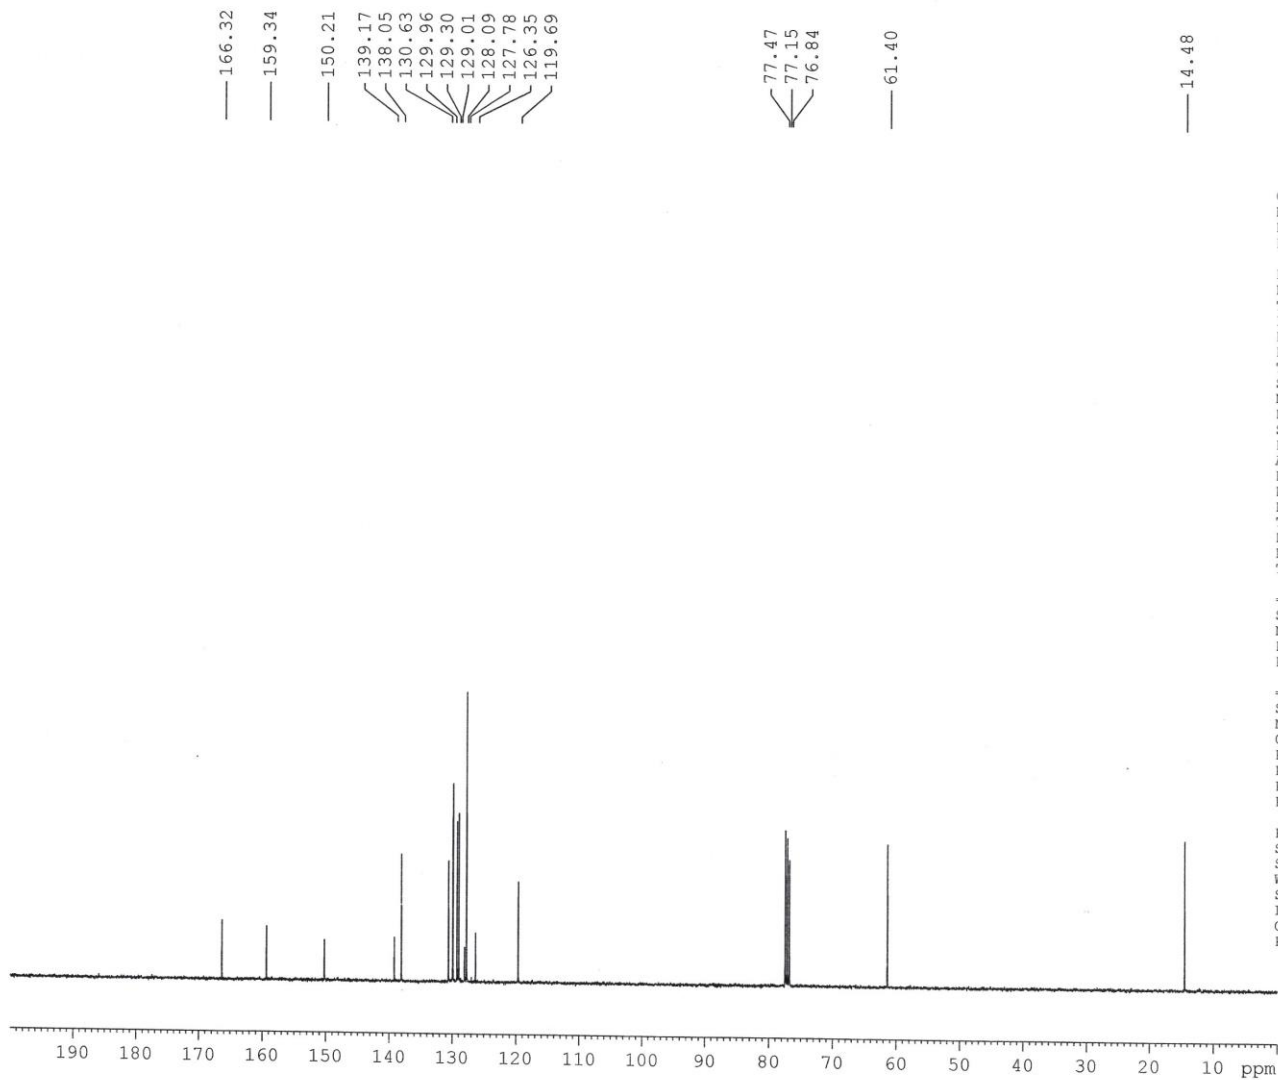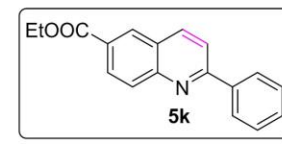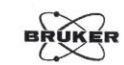

```

Current Data Parameters
NAME      Dr. A MAJEE 2018
EXPNO     830
PROCNO    1

F2 - Acquisition Parameters
Date_     20181119
Time      20.54
INSTRUM   spect
PROBHD    5 mm PABBO BB/
PULPROG   zgpg30
TD        32768
SOLVENT   CDC13
NS        220
DS        2
SWH       24038.461 Hz
FIDRES    0.733596 Hz
AQ        0.6815744 sec
RG        186.42
DW        20.800 usec
DE        6.50 usec
TE        297.1 K
D1        2.0000000 sec
D11       0.0300000 sec
TD0       1

===== CHANNEL f1 =====
SFO1      100.6278588 MHz
NUC1      13C
P1        8.90 usec
PLW1      54.0000000 W

===== CHANNEL f2 =====
SFO2      400.1516006 MHz
NUC2      1H
CPDPRG[2] waltz16
PCPD2     90.00 usec
PLW2      12.0000000 W
PLW12     0.32231000 W
PLW13     0.16212000 W

F2 - Processing parameters
SI        16384
SF        100.6177903 MHz
WDW       EM
SSB       0
LB        1.00 Hz
GB        0
PC        2.00
    
```



1H of VBSSM-423/69

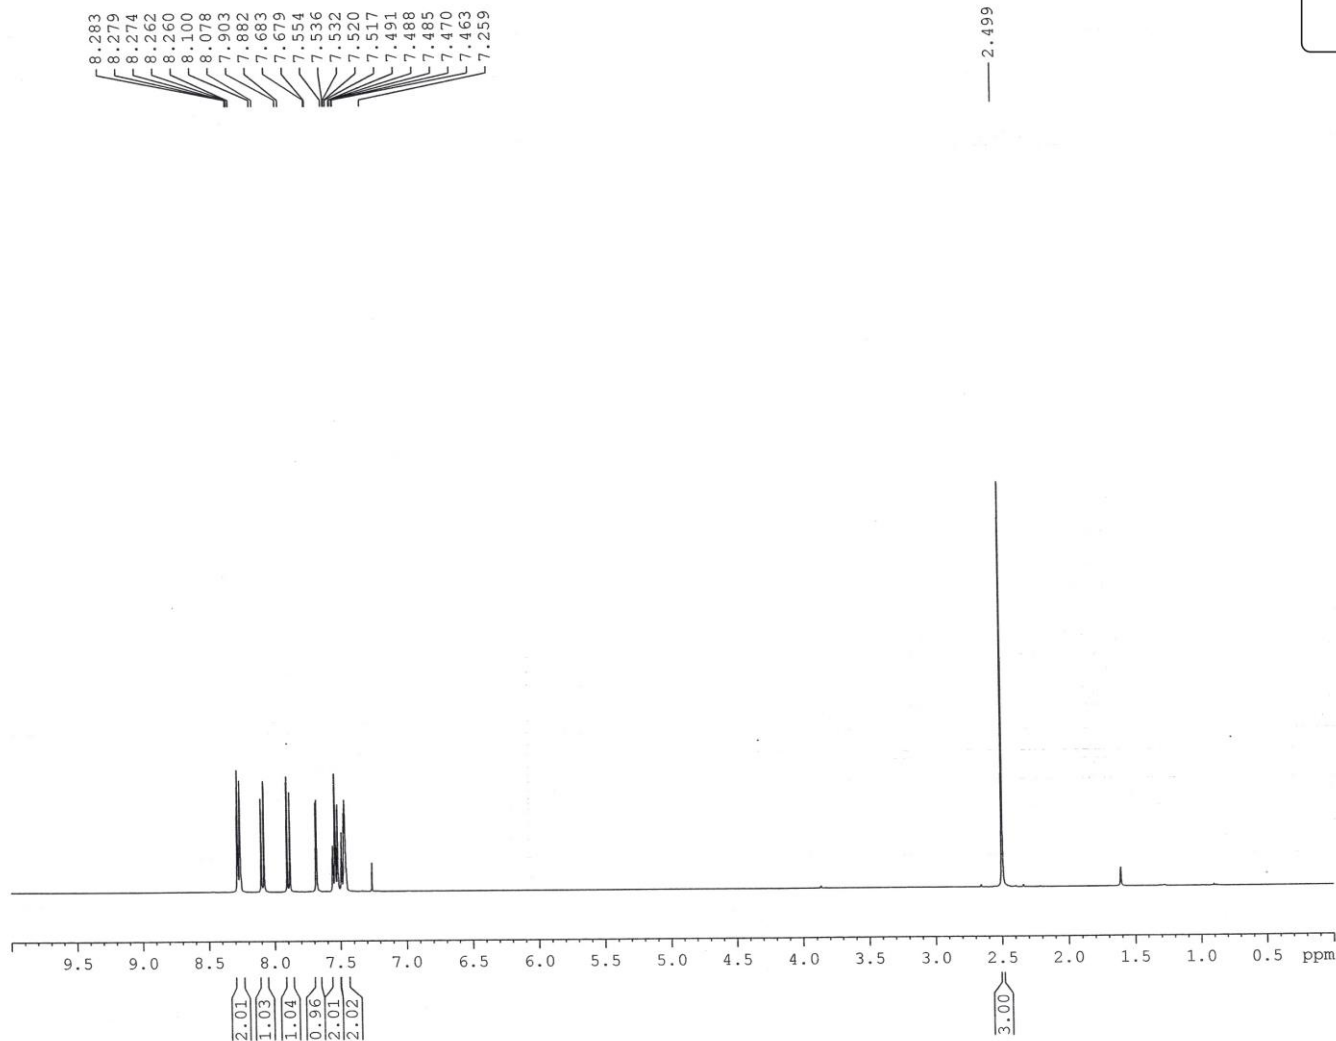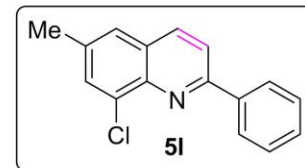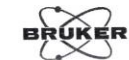

Current Data Parameters  
NAME Dr. A MAJEE 2018  
EXPNO 870  
PROCNO 1

F2 - Acquisition Parameters  
Date\_ 20181208  
Time\_ 10.16  
INSTRUM spect  
PROBHD 5 mm PABBO BB/  
PULPROG zg30  
TD 32768  
SOLVENT CDCl3  
NS 16  
DS 1  
SWH 8223.685 Hz  
FIDRES 0.250967 Hz  
AQ 1.9922944 sec  
RG 57.28  
DW 60.800 usec  
DE 6.50 usec  
TE 294.3 K  
D1 1.00000000 sec  
TDO 1

===== CHANNEL f1 =====  
SFO1 400.1524711 MHz  
NUC1 1H  
P1 14.75 usec  
PLW1 12.00000000 W

F2 - Processing parameters  
SI 16384  
SF 400.1500097 MHz  
WDW EM  
SSB 0  
LB 0.30 Hz  
GB 0  
PC 1.00

13C of VBSSM 423/69

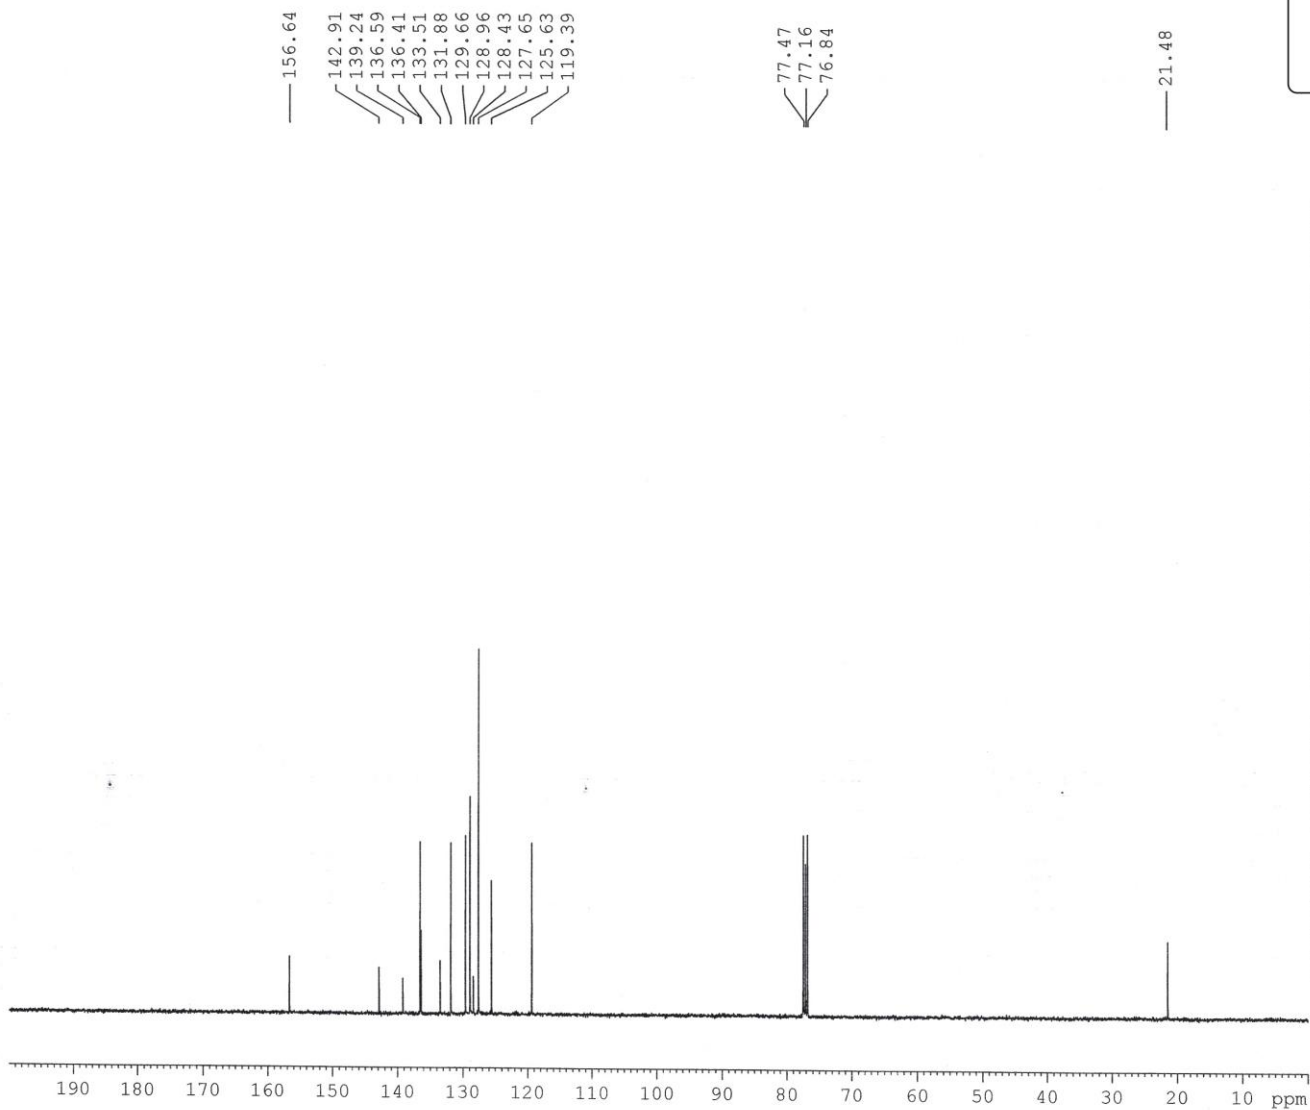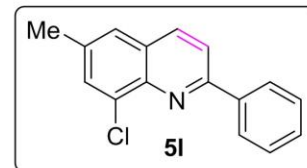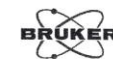

Current Data Parameters  
NAME Dr. A MAJEE 2018  
EXPNO 871  
PROCNO 1

F2 - Acquisition Parameters  
Date\_ 20181208  
Time 10.29  
INSTRUM spect  
PROBHD 5 mm PABBO BB/  
PULPROG zgpg30  
TD 32768  
SOLVENT CDCl3  
NS 220  
DS 2  
SWH 24038.461 Hz  
FIDRES 0.733596 Hz  
AQ 0.6815744 sec  
RG 186.42  
DW 20.800 usec  
DE 6.50 usec  
TE 294.8 K  
D1 2.00000000 sec  
D11 0.03000000 sec  
TD0 1

===== CHANNEL f1 =====  
SFO1 100.6278588 MHz  
NUC1 13C  
P1 8.90 usec  
PLW1 54.00000000 W

===== CHANNEL f2 =====  
SFO2 400.1516006 MHz  
NUC2 1H  
CPDPRG12 waltz16  
PCPD2 90.00 usec  
PLW2 12.00000000 W  
PLW12 0.32231000 W  
PLW13 0.16212000 W

F2 - Processing parameters  
SI 16384  
SF 100.6177905 MHz  
WDW EM  
SSB 0  
LB 1.00 Hz  
GB 0  
PC 2.00

1H of VBSSM-423/67

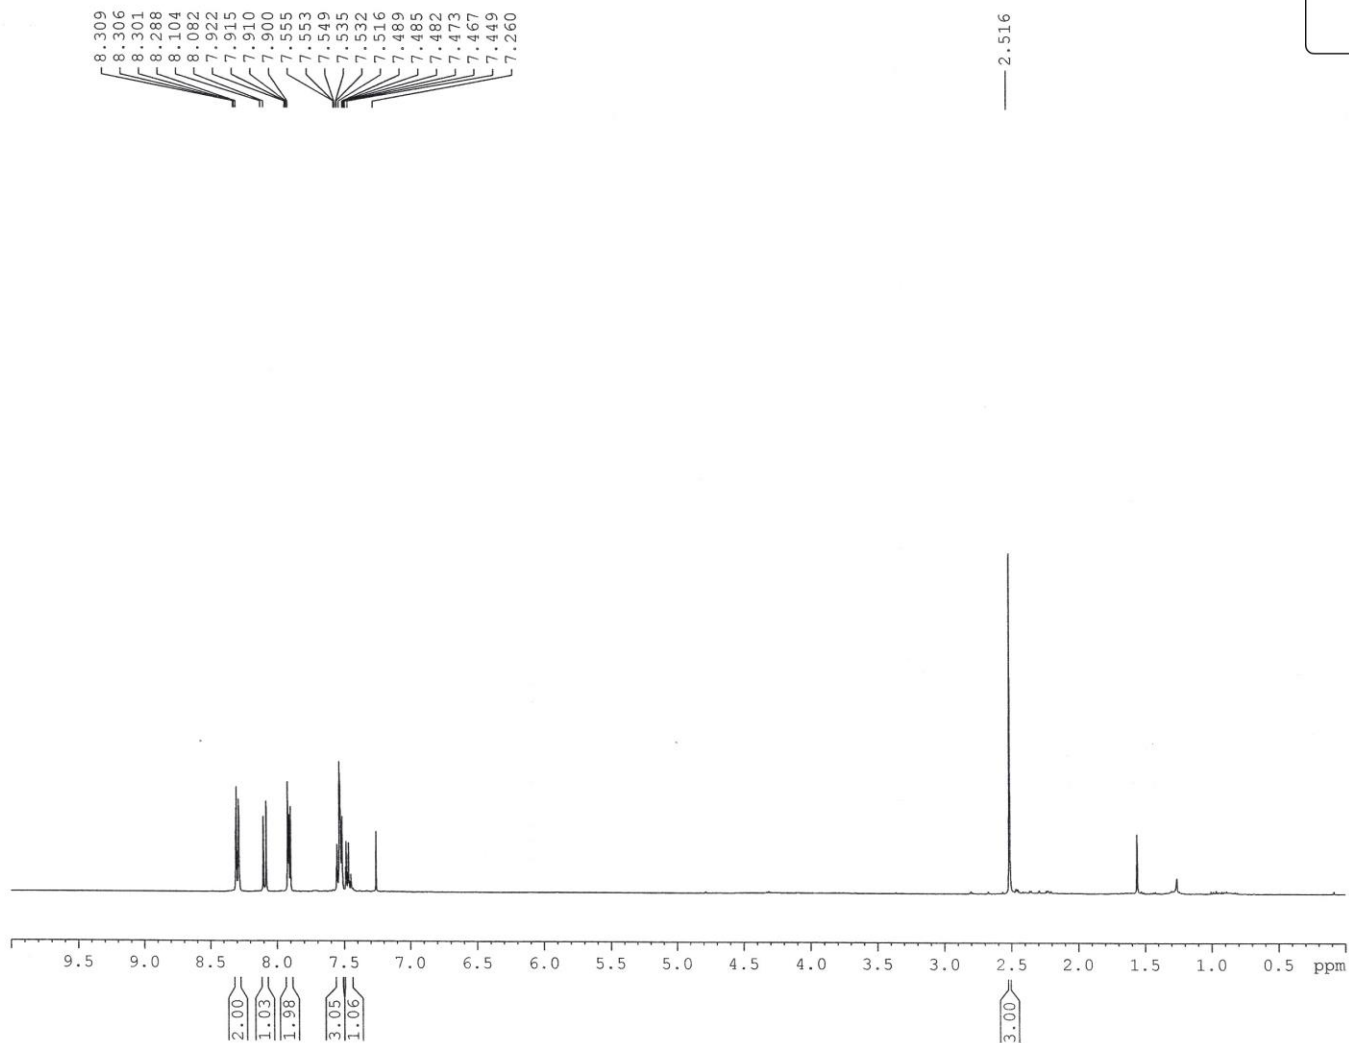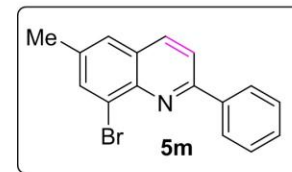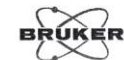

Current Data Parameters  
NAME Dr. A MAJEE 2018  
EXPNO 854  
PROCNO 1

F2 - Acquisition Parameters  
Date\_ 20181206  
Time 19.06  
INSTRUM spect  
PROBHD 5 mm PABBO BB/  
PULPROG zg30  
TD 32768  
SOLVENT CDC13  
NS 16  
DS 1  
SWH 8223.685 Hz  
FIDRES 0.250967 Hz  
AQ 1.9922944 sec  
RG 106.66  
DW 60.800 usec  
DE 6.50 usec  
TE 298.4 K  
D1 1.00000000 sec  
TD0 1

===== CHANNEL f1 =====  
SF01 400.1524711 MHz  
NUC1 1H  
P1 14.75 usec  
PLW1 12.00000000 W

F2 - Processing parameters  
SI 16384  
SF 400.1500096 MHz  
WDW EM  
SSB 0  
LB 0.30 Hz  
GB 0  
PC 1.00

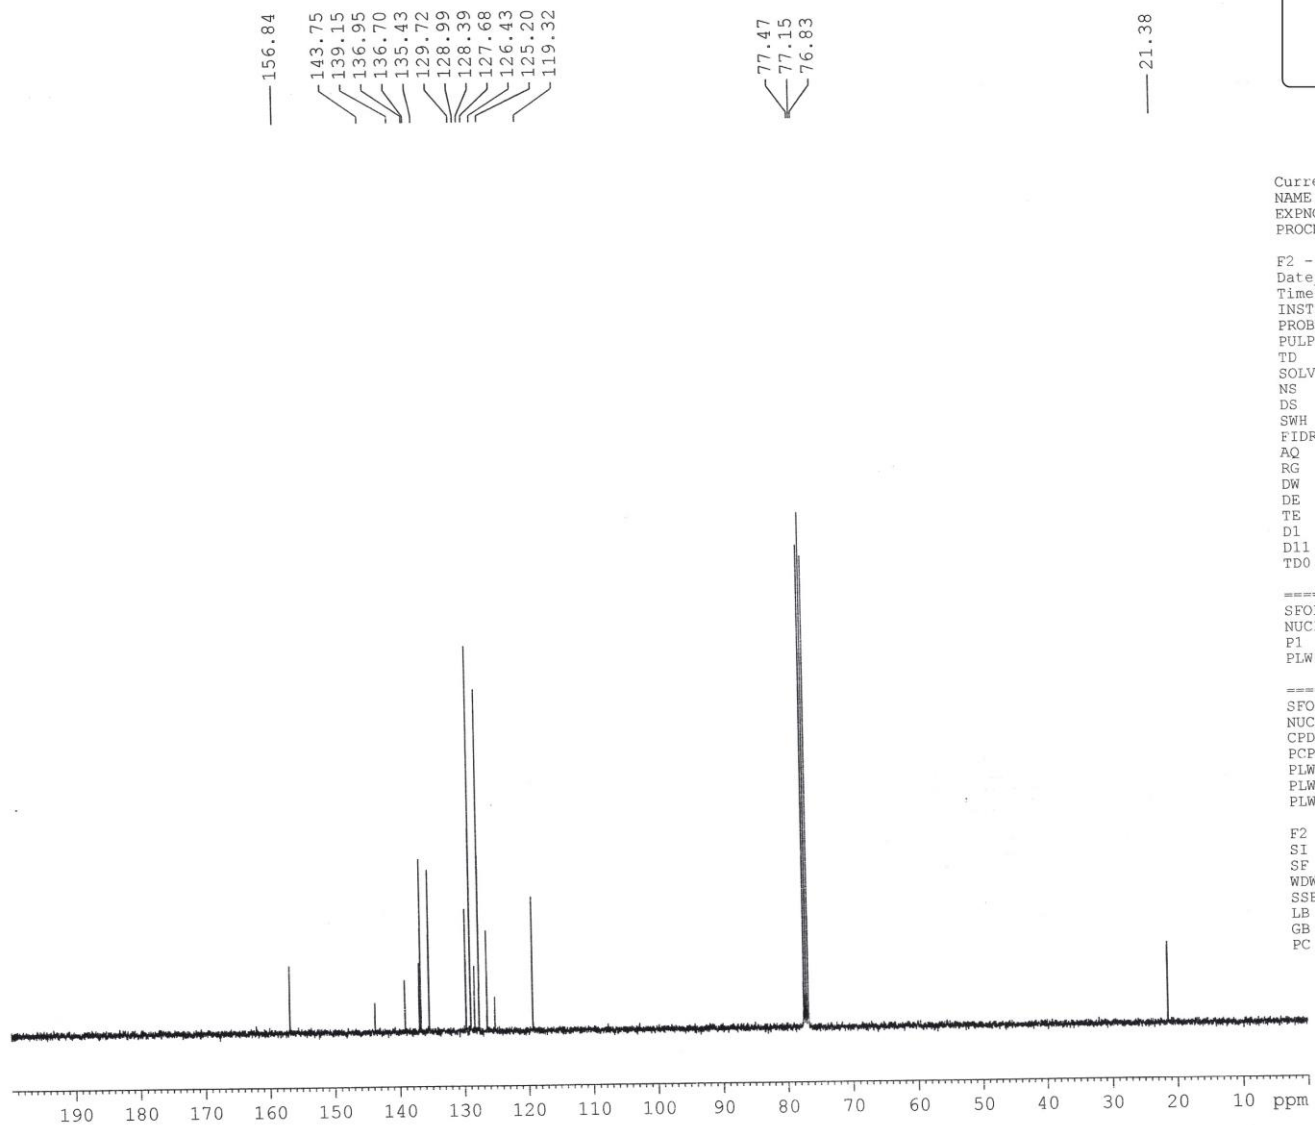

Current Data Parameters  
 NAME Dr. A MAJEE 2018  
 EXPNO 857  
 PROCNO 1

F2 - Acquisition Parameters  
 Date\_ 20181206  
 Time 19.42  
 INSTRUM spect  
 PROBHD 5 mm PABBO BB/  
 PULPROG zgpg30  
 TD 32768  
 SOLVENT CDCl3  
 NS 480  
 DS 2  
 SWH 24038.461 Hz  
 FIDRES 0.733596 Hz  
 AQ 0.6815744 sec  
 RG 186.42  
 DW 20.800 usec  
 DE 6.50 usec  
 TE 299.4 K  
 D1 2.00000000 sec  
 D11 0.03000000 sec  
 TD0 1

===== CHANNEL f1 =====  
 SFO1 100.6278588 MHz  
 NUC1 13C  
 P1 8.90 usec  
 PLW1 54.00000000 W

===== CHANNEL f2 =====  
 SFO2 400.1516006 MHz  
 NUC2 1H  
 CPDPRG[2] waltz16  
 PCPD2 90.00 usec  
 PLW2 12.00000000 W  
 PLW12 0.32231000 W  
 PLW13 0.16212000 W

F2 - Processing parameters  
 SI 16384  
 SF 100.6177860 MHz  
 WDW EM  
 SSB 0  
 LB 1.00 Hz  
 GB 0  
 PC 2.00

1H of VBSSM 423/27

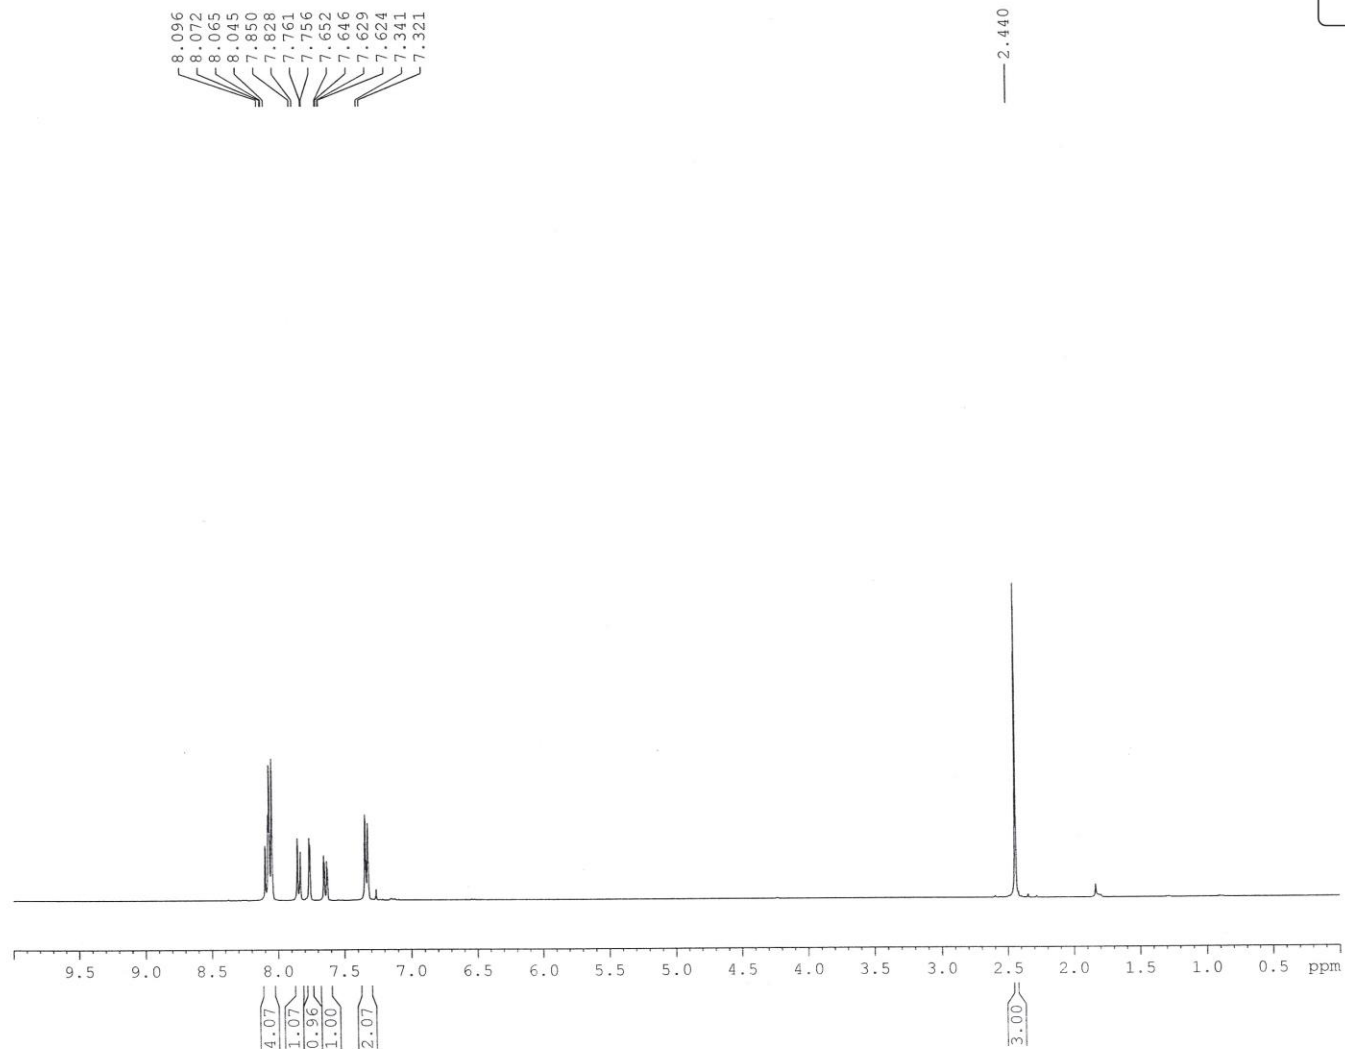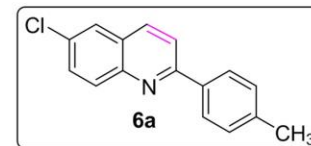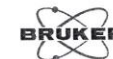

Current Data Parameters  
NAME Dr. A MAJEE 2018  
EXPNO 645  
PROCNO 1

F2 - Acquisition Parameters  
Date\_ 20180808  
Time\_ 17.57  
INSTRUM spect  
PROBHD 5 mm PABBO BB/  
PULPROG zg30  
TD 32768  
SOLVENT CDCl3  
NS 12  
DS 1  
SWH 8223.685 Hz  
FIDRES 0.250967 Hz  
AQ 1.9922944 sec  
RG 62.69  
DW 60.800 usec  
DE 6.50 usec  
TE 301.7 K  
D1 1.00000000 sec  
TD0 1

===== CHANNEL f1 =====  
SF01 400.1524711 MHz  
NUC1 1H  
P1 14.75 usec  
PLW1 12.00000000 W

F2 - Processing parameters  
SI 16384  
SF 400.1500093 MHz  
WDW EM  
SSB 0  
LB 0.30 Hz  
GB 0  
PC 1.00

157.59  
 146.77  
 139.80  
 136.50  
 135.77  
 131.76  
 131.35  
 130.54  
 129.72  
 127.72  
 127.48  
 126.21  
 119.67

77.47  
 77.15  
 76.83

21.45

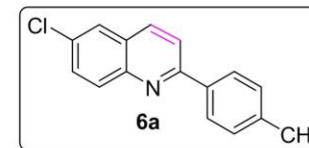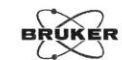

Current Data Parameters  
 NAME Dr. A MAJEE 2018  
 EXPNO 646  
 PROCNO 1

F2 - Acquisition Parameters  
 Date\_ 20180808  
 Time 18.09  
 INSTRUM spect  
 PROBHD 5 mm PABBO BB/  
 PULPROG zgpg30  
 TD 32768  
 SOLVENT CDCl3  
 NS 220  
 DS 2  
 SWH 24038.461 Hz  
 FIDRES 0.733596 Hz  
 AQ 0.6815744 sec  
 RG 186.42  
 DW 20.800 usec  
 DE 6.50 usec  
 TE 302.4 K  
 D1 2.0000000 sec  
 D11 0.03000000 sec  
 TDO 1

===== CHANNEL f1 =====  
 SFO1 100.6278588 MHz  
 NUC1 13C  
 P1 8.90 usec  
 PLW1 54.00000000 W

===== CHANNEL f2 =====  
 SFO2 400.1516006 MHz  
 NUC2 1H  
 CPDPRG[2] waltz16  
 FCPD2 90.00 usec  
 PLW2 12.00000000 W  
 PLW12 0.32231000 W  
 PLW13 0.16212000 W

F2 - Processing parameters  
 SI 16384  
 SF 100.6177887 MHz  
 WDW EM  
 SSB 0  
 LB 1.00 Hz  
 GB 0  
 PC 2.00

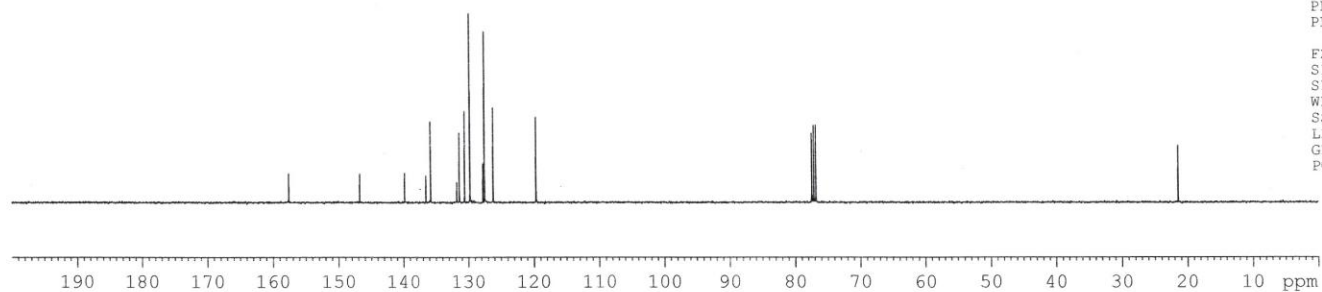

1H of VBSSM 423/35

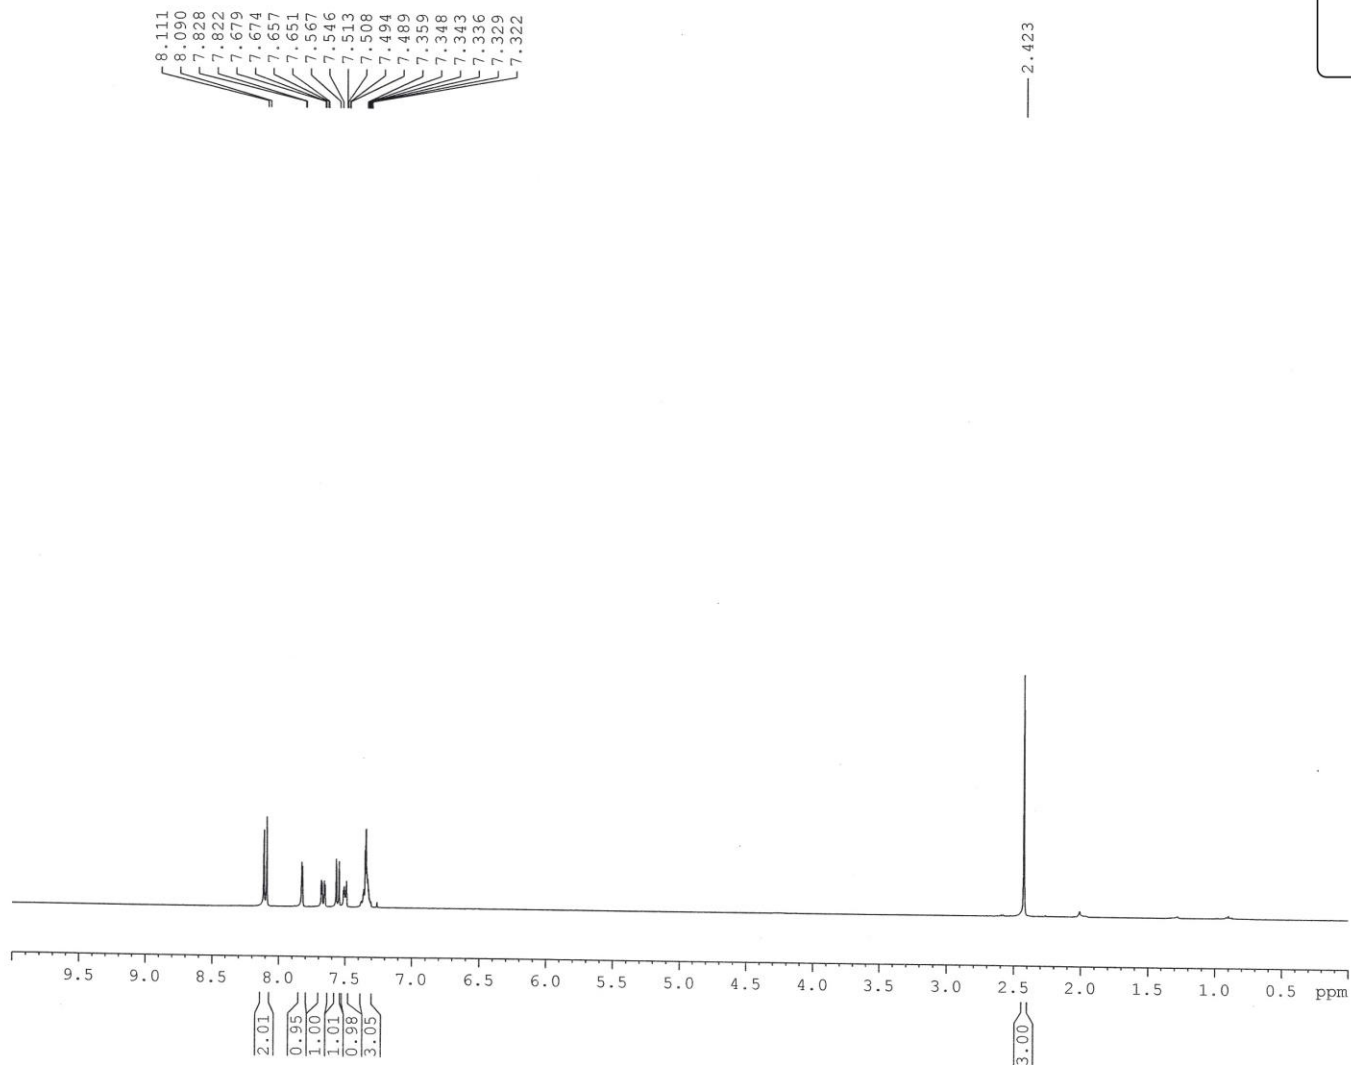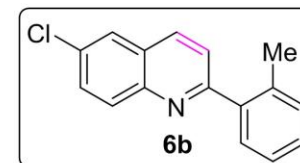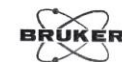

Current Data Parameters  
NAME Dr. A MAJEE 2018  
EXPNO 683  
PROCNO 1

F2 - Acquisition Parameters  
Date\_ 20180824  
Time\_ 16.08  
INSTRUM spect  
PROBHD 5 mm PABBO BB/  
PULPROG zg30  
TD 32768  
SOLVENT CDCl3  
NS 12  
DS 1  
SWH 8223.685 Hz  
FIDRES 0.250967 Hz  
AQ 1.9922944 sec  
RG 47.25  
DW 60.800 usec  
DE 6.50 usec  
TE 299.3 K  
D1 1.00000000 sec  
TD0 1

===== CHANNEL f1 =====  
SF01 400.1524711 MHz  
NUC1 1H  
P1 14.75 usec  
PLW1 12.00000000 W

F2 - Processing parameters  
SI 16384  
SF 400.1500096 MHz  
WDW EM  
SSB 0  
LB 0.30 Hz  
GB 0  
PC 1.00

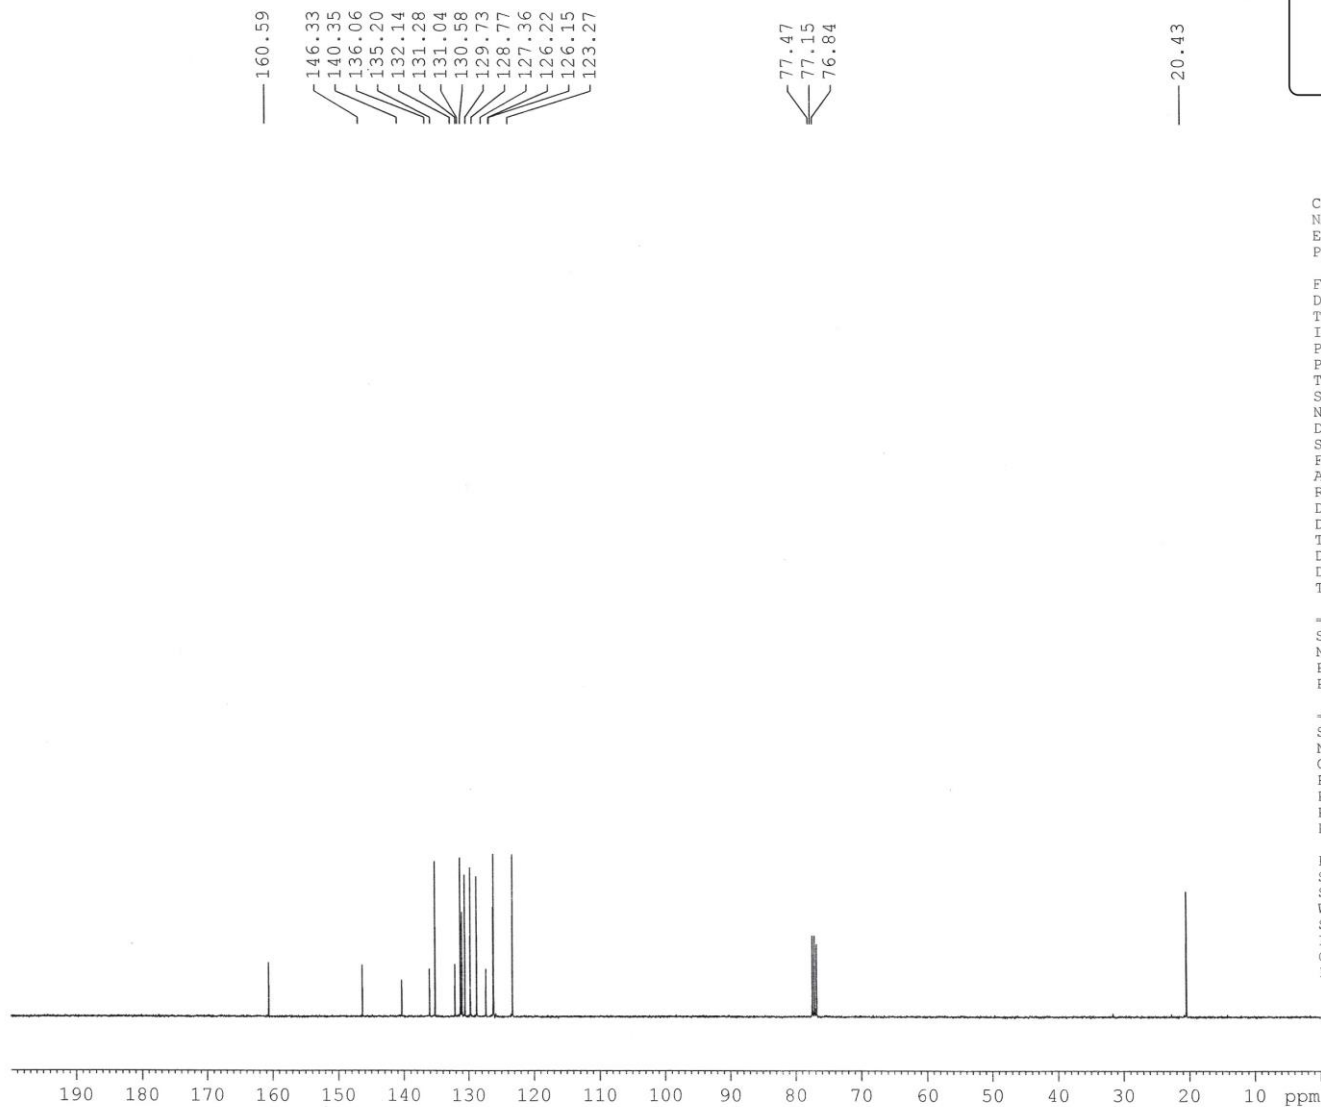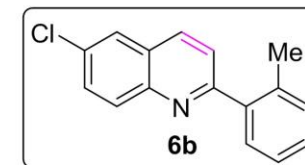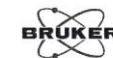

Current Data Parameters  
NAME Dr. A MAJEE 2018  
EXPNO 684  
PROCNO 1

F2 - Acquisition Parameters  
Date\_ 20180824  
Time 16.20  
INSTRUM spect  
PROBHD 5 mm PABBO BB/  
PULPROG zgpg30  
TD 32768  
SOLVENT CDCl3  
NS 220  
DS 2  
SWH 24038.461 Hz  
FIDRES 0.733596 Hz  
AQ 0.6815744 sec  
RG 186.42  
DW 20.800 usec  
DE 6.50 usec  
TE 300.0 K  
D1 2.0000000 sec  
D11 0.0300000 sec  
TD0 1

----- CHANNEL f1 -----  
SFO1 100.6278588 MHz  
NUC1 13C  
P1 8.90 usec  
PLW1 54.0000000 W

----- CHANNEL f2 -----  
SFO2 400.1516006 MHz  
NUC2 1H  
CPDPRG[2] waltz16  
PCPD2 90.00 usec  
PLW2 12.0000000 W  
PLW12 0.32231000 W  
PLW13 0.16212000 W

F2 - Processing parameters  
SI 16384  
SF 100.6177933 MHz  
WDW EM  
SSB 0  
LB 1.00 Hz  
GB 0  
PC 2.00



1H of VBSSM 423/33

8.155  
8.141  
8.133  
8.119  
8.096  
8.075  
8.052  
7.825  
7.803  
7.776  
7.771  
7.658  
7.652  
7.636  
7.630  
7.259  
7.223  
7.218  
7.202  
7.185  
7.180

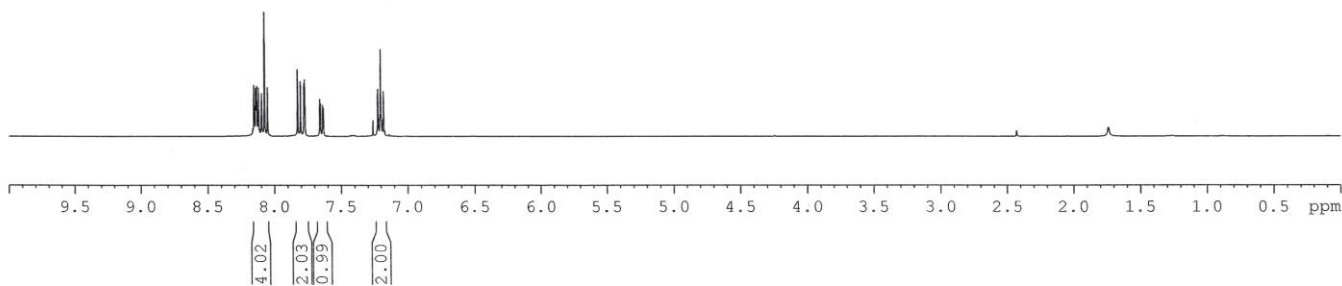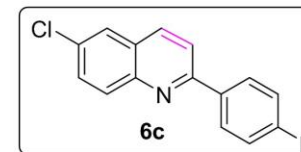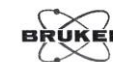

Current Data Parameters  
NAME Dr. A MAJEE 2018  
EXPNO 664  
PROCNO 1

F2 - Acquisition Parameters  
Date\_ 20180817  
Time\_ 11.35  
INSTRUM spect  
PROBHD 5 mm PABBO BB/  
PULPROG zg30  
TD 32768  
SOLVENT CDC13  
NS 12  
DS 1  
SWH 8223.685 Hz  
FIDRES 0.250967 Hz  
AQ 1.9922944 sec  
RG 87.66  
DW 60.800 usec  
DE 6.50 usec  
TE 299.5 K  
D1 1.00000000 sec  
TDO 1

===== CHANNEL f1 =====  
SFO1 400.1524711 MHz  
NUC1 1H  
P1 14.75 usec  
PLW1 12.00000000 W

F2 - Processing parameters  
SI 16384  
SF 400.1500098 MHz  
WDW EM  
SSB 0  
LB 0.30 Hz  
GB 0  
PC 1.00

165.29  
162.81  
156.48  
146.70  
136.04  
135.44  
135.41  
132.09  
131.34  
130.79  
129.52  
129.44  
127.71  
126.25  
119.47  
116.06  
115.85

77.47  
77.15  
76.84

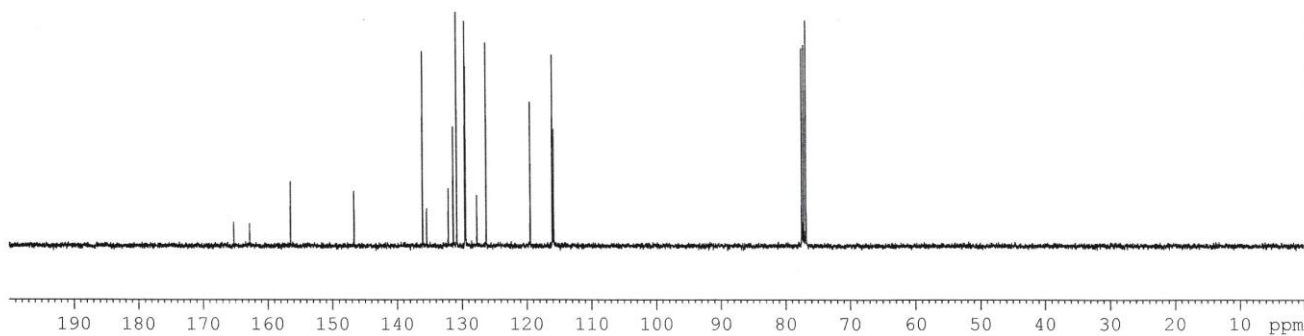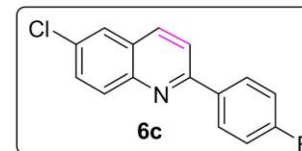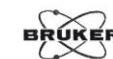

Current Data Parameters  
NAME Dr. A MAJEE 2018  
EXPNO 665  
PROCNO 1

F2 - Acquisition Parameters  
Date\_ 20180817  
Time 11.47  
INSTRUM spect  
PROBHD 5 mm PABBO BB/  
PULPROG zgpg30  
TD 32768  
SOLVENT CDCl3  
NS 220  
DS 2  
SWH 24038.461 Hz  
FIDRES 0.733596 Hz  
AQ 0.6815744 sec  
RG 186.42  
DW 20.800 usec  
DE 6.50 usec  
TE 299.9 K  
D1 2.00000000 sec  
D11 0.03000000 sec  
TDO 1

===== CHANNEL f1 =====  
SFO1 100.6278588 MHz  
NUC1 13C  
P1 8.90 usec  
PLW1 54.00000000 W

===== CHANNEL f2 =====  
SFO2 400.1516006 MHz  
NUC2 1H  
CPDPRG[2] waltz16  
PCPD2 90.00 usec  
PLW2 12.00000000 W  
PLW12 0.32231000 W  
PLW13 0.16212000 W

F2 - Processing parameters  
SI 16384  
SF 100.6177867 MHz  
WDW EM  
SSB 0  
LB 1.00 Hz  
GB 0  
PC 2.00

1H of VBSSM 423/28

8.101  
8.095  
8.079  
8.054  
7.831  
7.809  
7.781  
7.775  
7.663  
7.657  
7.641  
7.635  
7.501  
7.494  
7.489  
7.477  
7.472  
7.467  
7.260

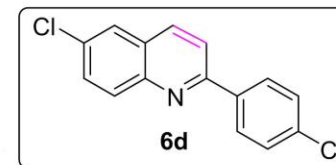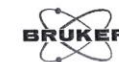

Current Data Parameters  
NAME Dr. A MAJEE 2018  
EXPNO 651  
PROCNO 1

F2 - Acquisition Parameters  
Date\_ 20180809  
Time\_ 13.29  
INSTRUM spect  
PROBHD 5 mm PABBO BB/  
PULPROG zg30  
TD 32768  
SOLVENT CDCl3  
NS 12  
DS 1  
SWH 8223.685 Hz  
FIDRES 0.250967 Hz  
AQ 1.9922944 sec  
RG 93.46  
DW 60.800 usec  
DE 6.50 usec  
TE 302.8 K  
D1 1.00000000 sec  
TD0 1

==== CHANNEL f1 =====  
SF01 400.1524711 MHz  
NUC1 1H  
P1 14.75 usec  
PLW1 12.00000000 W

F2 - Processing parameters  
SI 16384  
SF 400.1500097 MHz  
WDW EM  
SSB 0  
LB 0.30 Hz  
GB 0  
PC 1.00

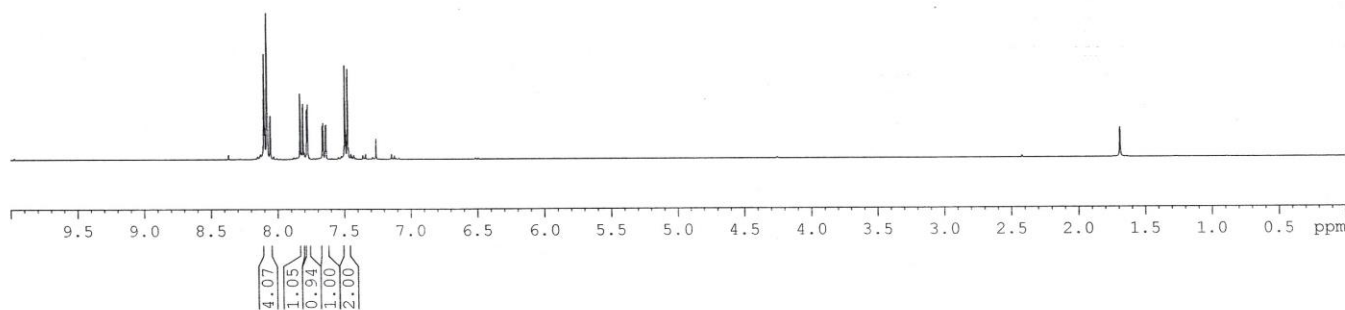

156.27  
 146.73  
 137.68  
 136.09  
 135.95  
 132.28  
 131.41  
 130.86  
 129.19  
 128.85  
 127.86  
 126.27  
 119.41

77.48  
 77.16  
 76.84

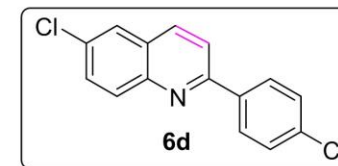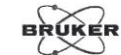

Current Data Parameters  
 NAME Dr. A MAJEE 2018  
 EXPNO 652  
 PROCNO 1

F2 - Acquisition Parameters  
 Date\_ 20180809  
 Time 13.39  
 INSTRUM spect  
 PROBHD 5 mm PABBO BB/  
 PULPROG zgpg30  
 TD 32768  
 SOLVENT CDCl3  
 NS 180  
 DS 2  
 SWH 24038.461 Hz  
 FIDRES 0.733596 Hz  
 AQ 0.6815744 sec  
 RG 186.42  
 DW 20.800 usec  
 DE 6.50 usec  
 TE 303.0 K  
 D1 2.00000000 sec  
 D11 0.03000000 sec  
 TD0 1

==== CHANNEL f1 =====  
 SFO1 100.6278588 MHz  
 NUC1 13C  
 P1 8.90 usec  
 PLW1 54.00000000 W

==== CHANNEL f2 =====  
 SFO2 400.1516006 MHz  
 NUC2 1H  
 CPDPRG[2] waltz16  
 PCPD2 90.00 usec  
 PLW2 12.00000000 W  
 PLW12 0.32231000 W  
 PLW13 0.16212000 W

F2 - Processing parameters  
 SI 16384  
 SF 100.6177855 MHz  
 WDW EM  
 SSB 0  
 LB 1.00 Hz  
 GB 0  
 PC 2.00

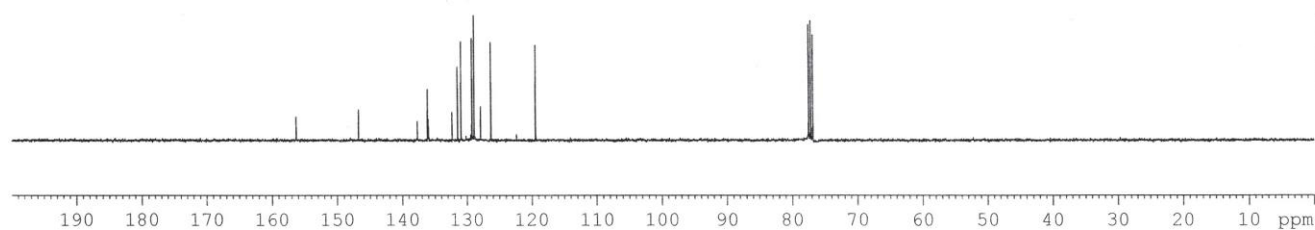

1H of VBSSM 423/29

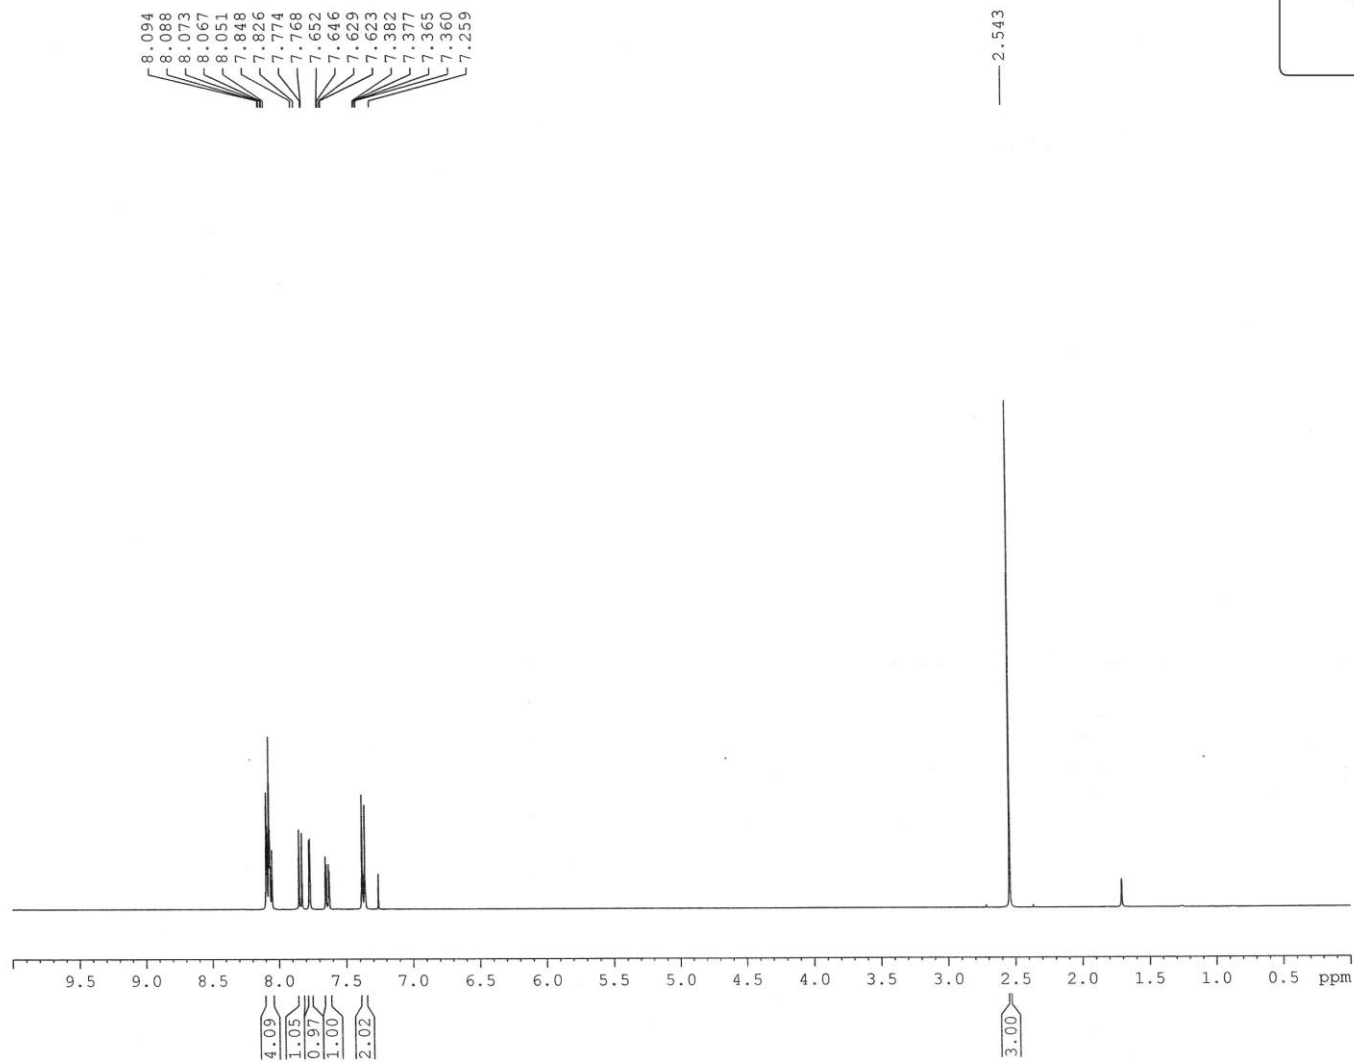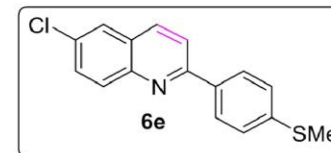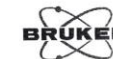

Current Data Parameters  
NAME Dr. A MAJEE 2018  
EXPNO 673  
PROCNO 1

F2 - Acquisition Parameters  
Date\_ 20181210  
Time\_ 14.59  
INSTRUM spect  
PROBHD 5 mm PABBO BB/  
PULPROG zg30  
TD 32768  
SOLVENT CDCl3  
NS 16  
DS 1  
SWH 8223.685 Hz  
FIDRES 0.250967 Hz  
AQ 1.9922944 sec  
RG 87.66  
DW 60.800 usec  
DE 6.50 usec  
TE 294.2 K  
D1 1.00000000 sec  
TD0 1

===== CHANNEL f1 =====  
SFO1 400.1524711 MHz  
NUC1 1H  
P1 14.75 usec  
PLW1 12.00000000 W

F2 - Processing parameters  
SI 16384  
SF 400.1500097 MHz  
WDW EM  
SSB 0  
LB 0.30 Hz  
GB 0  
PC 1.00

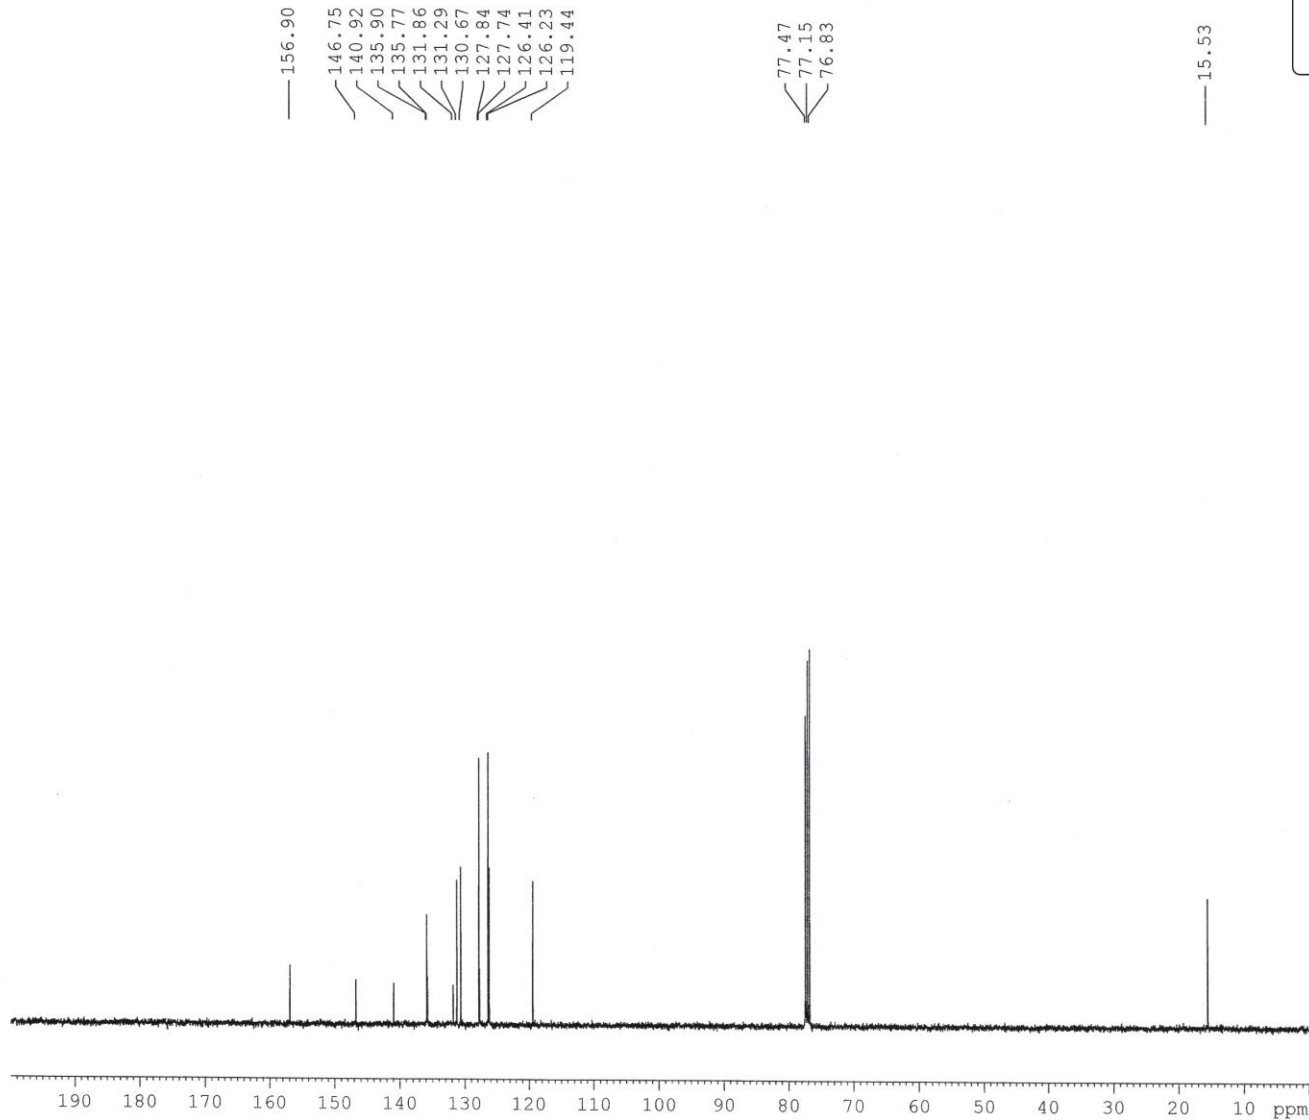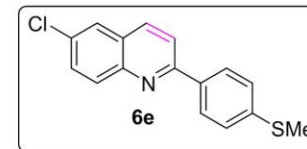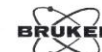

Current Data Parameters  
 NAME Dr. A MAJEE 2018  
 EXPNO 674  
 PROCNO 1

F2 - Acquisition Parameters  
 Date 20181210  
 Time 15.13  
 INSTRUM spect  
 PROBHD 5 mm PABBO BB/  
 PULPROG zgpg30  
 TD 32768  
 SOLVENT CDC13  
 NS 256  
 DS 2  
 SWH 24038.461 Hz  
 FIDRES 0.733596 Hz  
 AQ 0.6815744 sec  
 RG 186.42  
 DW 20.800 usec  
 DE 6.50 usec  
 TE 294.8 K  
 D1 2.00000000 sec  
 D11 0.03000000 sec  
 TD0 1

===== CHANNEL f1 =====  
 SFO1 100.6278588 MHz  
 NUC1 13C  
 P1 8.90 usec  
 PLW1 54.00000000 W

===== CHANNEL f2 =====  
 SFO2 400.1516006 MHz  
 NUC2 1H  
 CPDPRG[2] waltz16  
 PCPD2 90.00 usec  
 PLW2 12.00000000 W  
 PLW12 0.32231000 W  
 PLW13 0.16212000 W

F2 - Processing parameters  
 SI 16384  
 SF 100.6177889 MHz  
 WDW EM  
 SSB 0  
 LB 1.00 Hz  
 GB 0  
 PC 2.00

1H of VBSSM 423/1

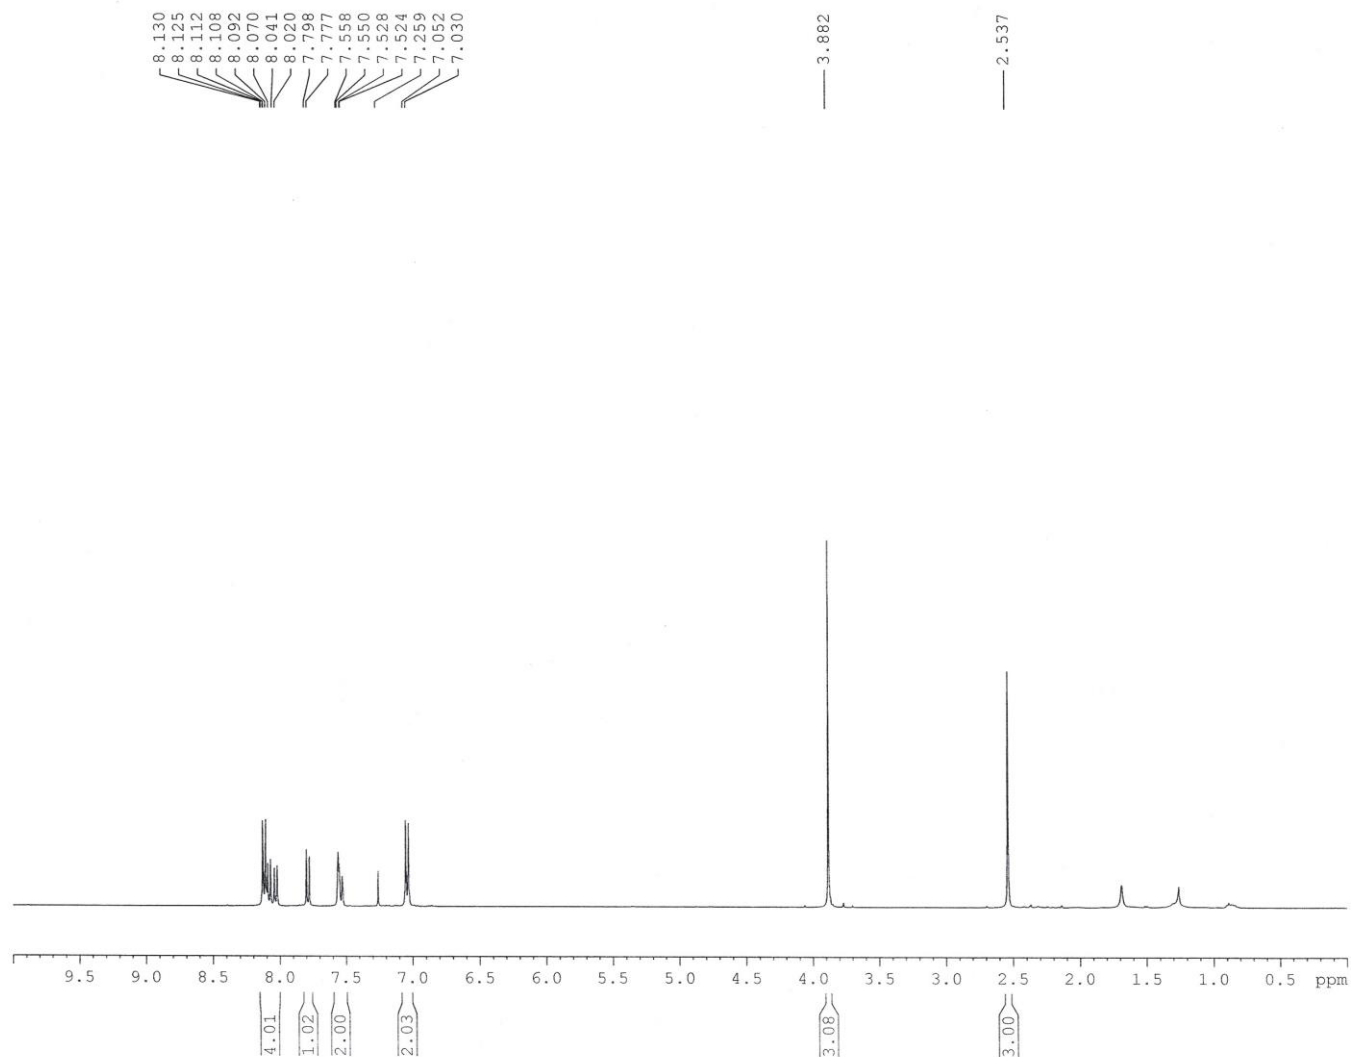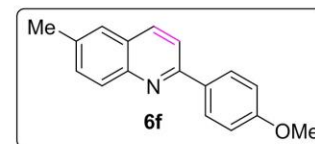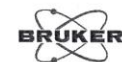

Current Data Parameters  
NAME Dr. A MAJEE 2018  
EXPNO 388  
PROCNO 1

F2 - Acquisition Parameters  
Date\_ 20180512  
Time\_ 9.48  
INSTRUM spect  
PROBHD 5 mm PABBO BB/  
PULPROG zg30  
TD 32768  
SOLVENT CDCl3  
NS 16  
DS 1  
SWH 8223.685 Hz  
FIDRES 0.250967 Hz  
AQ 1.9922944 sec  
RG 135.7  
DW 60.800 usec  
DE 6.50 usec  
TE 298.3 K  
D1 1.00000000 sec  
TD0 1

===== CHANNEL f1 =====  
SFO1 400.1524711 MHz  
NUC1 1H  
P1 14.75 usec  
PLW1 12.00000000 W

F2 - Processing parameters  
SI 16384  
SF 400.1500097 MHz  
WDW EM  
SSB 0  
LB 0.30 Hz  
GB 0  
PC 1.00

13C of VBSSM 423/1

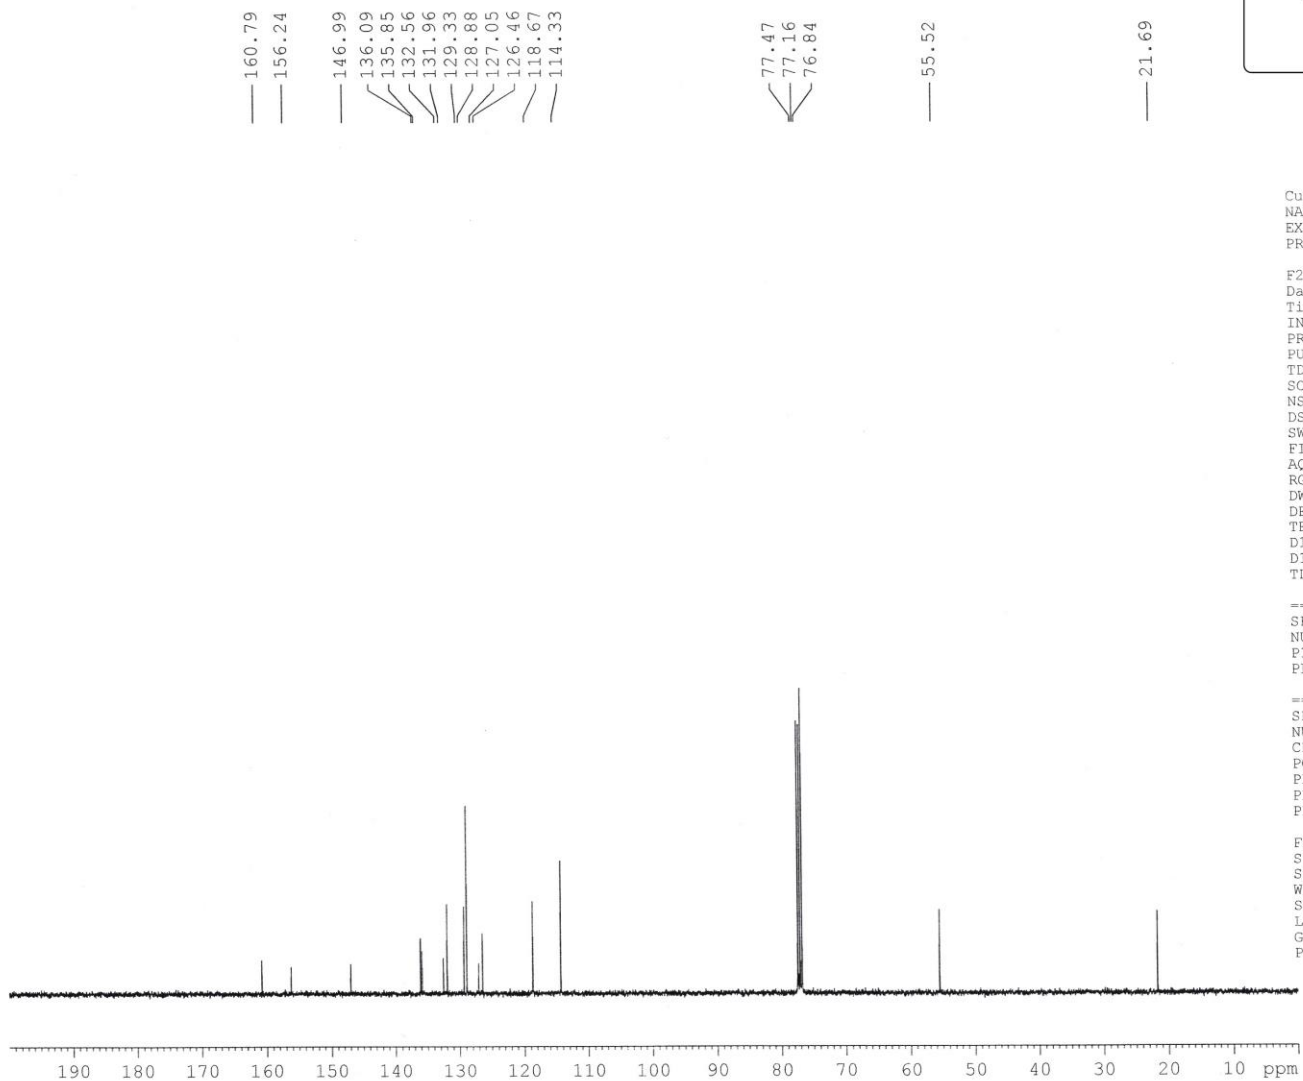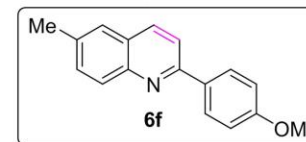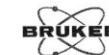

Current Data Parameters  
NAME Dr. A MAJEE 2018  
EXPNO 389  
PROCNO 1

F2 - Acquisition Parameters  
Date\_ 20180512  
Time\_ 10.05  
INSTRUM spect  
PROBHD 5 mm PABBO BB/  
PULPROG zgpg30  
TD 32768  
SOLVENT CDCl3  
NS 320  
DS 2  
SWH 24038.461 Hz  
FIDRES 0.733596 Hz  
AQ 0.6815744 sec  
RG 186.42  
DW 20.800 usec  
DE 6.50 usec  
TE 298.9 K  
D1 2.0000000 sec  
D11 0.0300000 sec  
TD0 1

===== CHANNEL f1 =====  
SFO1 100.6278588 MHz  
NUC1 13C  
P1 8.90 usec  
PLW1 54.0000000 W

===== CHANNEL f2 =====  
SFO2 400.1516006 MHz  
NUC2 1H  
PCPDPRG[2] waltz16  
PCPD2 90.00 usec  
PLW2 12.0000000 W  
PLW12 0.32231000 W  
PLW13 0.16212000 W

F2 - Processing parameters  
SI 16384  
SF 100.6177851 MHz  
WDW EM  
SSB 0  
LB 1.00 Hz  
GB 0  
PC 1.40



1H of VBSSM-423/65

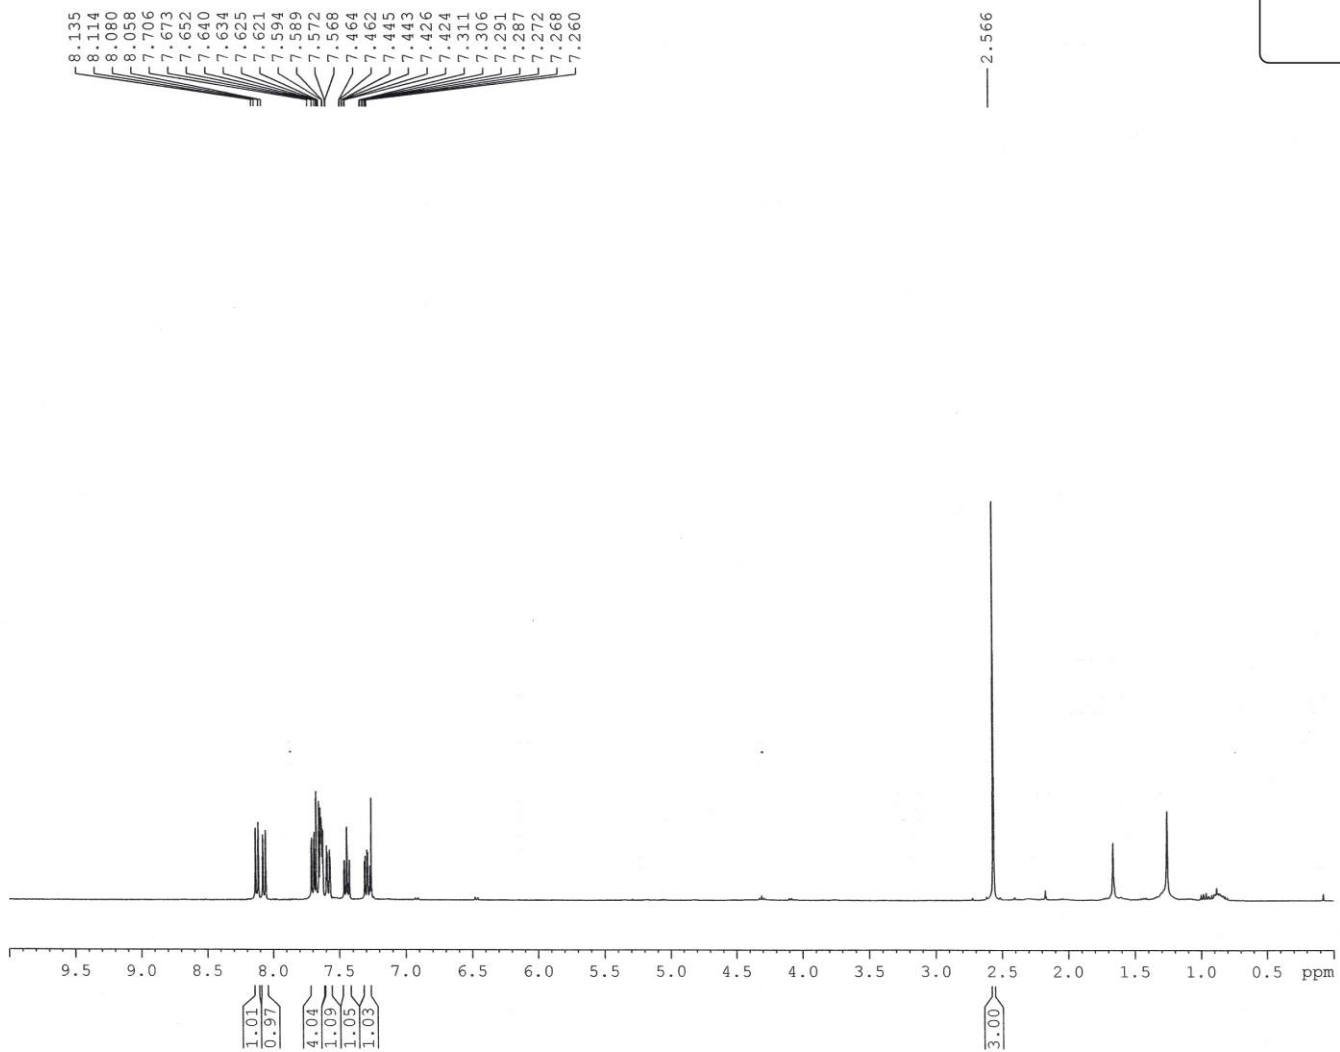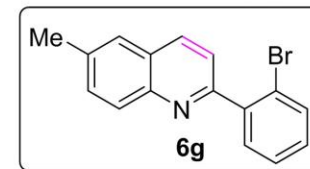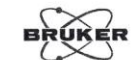

Current Data Parameters  
NAME Dr. A MAJEE 2018  
EXPNO 860  
PROCNO 1

F2 - Acquisition Parameters  
Date\_ 20181204  
Time\_ 16.19  
INSTRUM spect  
PROBHD 5 mm PABBO BB/  
PULPROG zg30  
TD 32768  
SOLVENT CDCl3  
NS 16  
DS 1  
SWH 8223.685 Hz  
FIDRES 0.250967 Hz  
AQ 1.9922944 sec  
RG 93.46  
DW 60.800 usec  
DE 6.50 usec  
TE 297.7 K  
D1 1.00000000 sec  
TD0 1

==== CHANNEL f1 =====  
SFO1 400.1524711 MHz  
NUC1 1H  
P1 14.75 usec  
PLW1 12.00000000 W

F2 - Processing parameters  
SI 16384  
SF 400.1500096 MHz  
WDW EM  
SSB 0  
LB 0.30 Hz  
GB 0  
PC 1.00

157.97  
 146.65  
 141.91  
 136.84  
 135.10  
 133.35  
 132.11  
 131.69  
 129.98  
 129.47  
 127.78  
 127.29  
 126.52  
 122.79  
 122.05

77.47  
 77.15  
 76.83

21.76

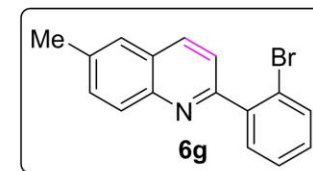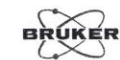

Current Data Parameters  
 NAME Dr. A MAJEE 2018  
 EXPNO 861  
 PROCNO 1

F2 - Acquisition Parameters  
 Date\_ 20181204  
 Time 16.36  
 INSTRUM spect  
 PROBHD 5 mm PABBO BB/  
 PULPROG zgpg30  
 TD 32768  
 SOLVENT CDCl3  
 NS 220  
 DS 2  
 SWH 24038.461 Hz  
 FIDRES 0.733596 Hz  
 AQ 0.6815744 sec  
 RG 186.42  
 DW 20.800 usec  
 DE 6.50 usec  
 TE 298.5 K  
 D1 2.00000000 sec  
 D11 0.03000000 sec  
 TD0 1

===== CHANNEL f1 =====  
 SFO1 100.6278588 MHz  
 NUC1 13C  
 P1 8.90 usec  
 PLW1 54.00000000 W

===== CHANNEL f2 =====  
 SFO2 400.1516006 MHz  
 NUC2 1H  
 CPDPRG[2] waltz16  
 PCPD2 90.00 usec  
 PLW2 12.00000000 W  
 PLW12 0.32231000 W  
 PLW13 0.16212000 W

F2 - Processing parameters  
 SI 16384  
 SF 100.6177857 MHz  
 WDW EM  
 SSB 0  
 LB 1.00 Hz  
 GB 0  
 PC 2.00

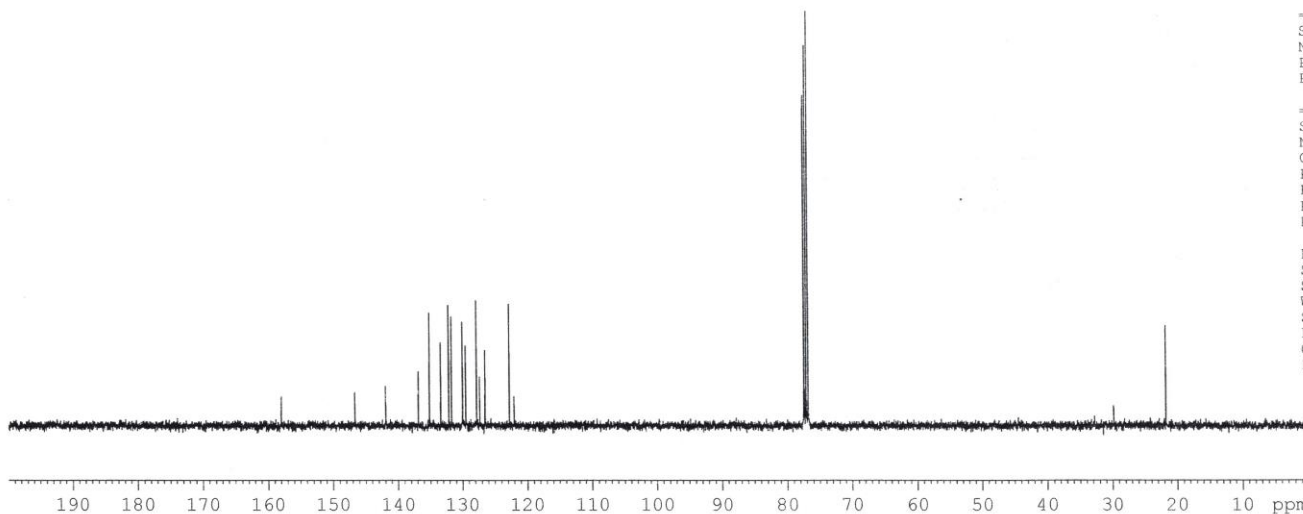

1H of VBSSM 423/47

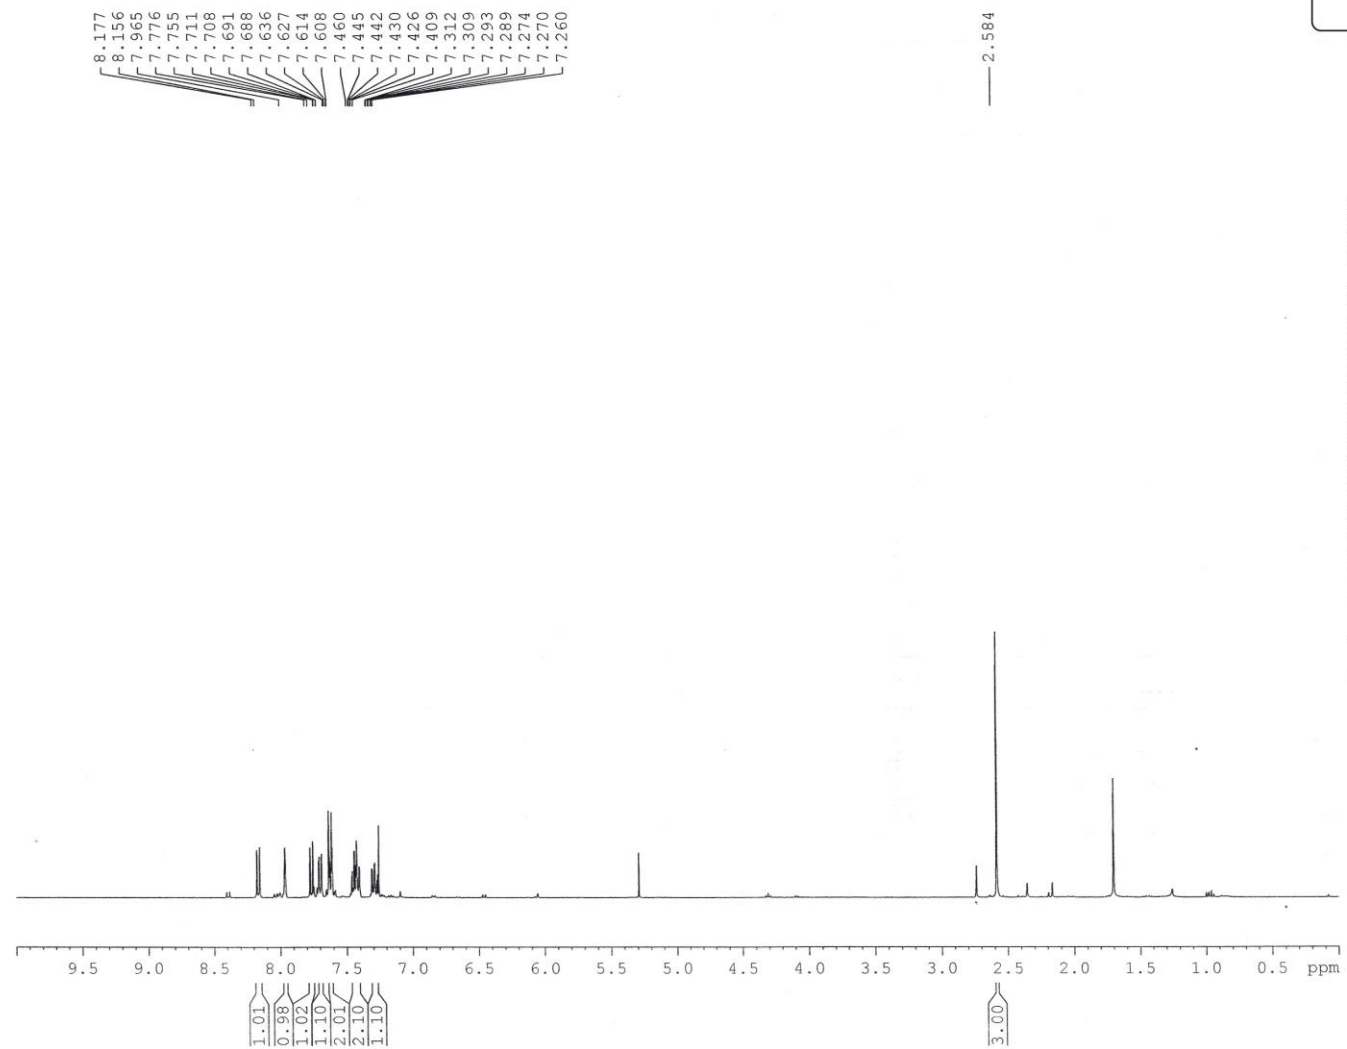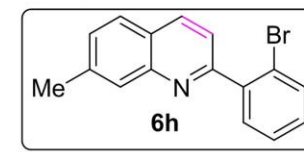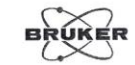

Current Data Parameters  
NAME Dr. A MAJEE 2018  
EXPNO 766  
PROCNO 1

F2 - Acquisition Parameters  
Date\_ 20180924  
Time\_ 20.33  
INSTRUM spect  
PROBHD 5 mm PABBO BB/  
PULPROG zg30  
TD 32768  
SOLVENT CDCl3  
NS 8  
DS 1  
SWH 8223.685 Hz  
FIDRES 0.250967 Hz  
AQ 1.9922944 sec  
RG 87.66  
DW 60.800 usec  
DE 6.50 usec  
TE 298.6 K  
D1 1.00000000 sec  
TD0 1

==== CHANNEL f1 =====  
SF01 400.1524711 MHz  
NUC1 1H  
P1 14.75 usec  
PLW1 12.00000000 W

F2 - Processing parameters  
SI 16384  
SF 400.1500096 MHz  
WDW EM  
SSB 0  
LB 0.30 Hz  
GE 0  
PC 1.00

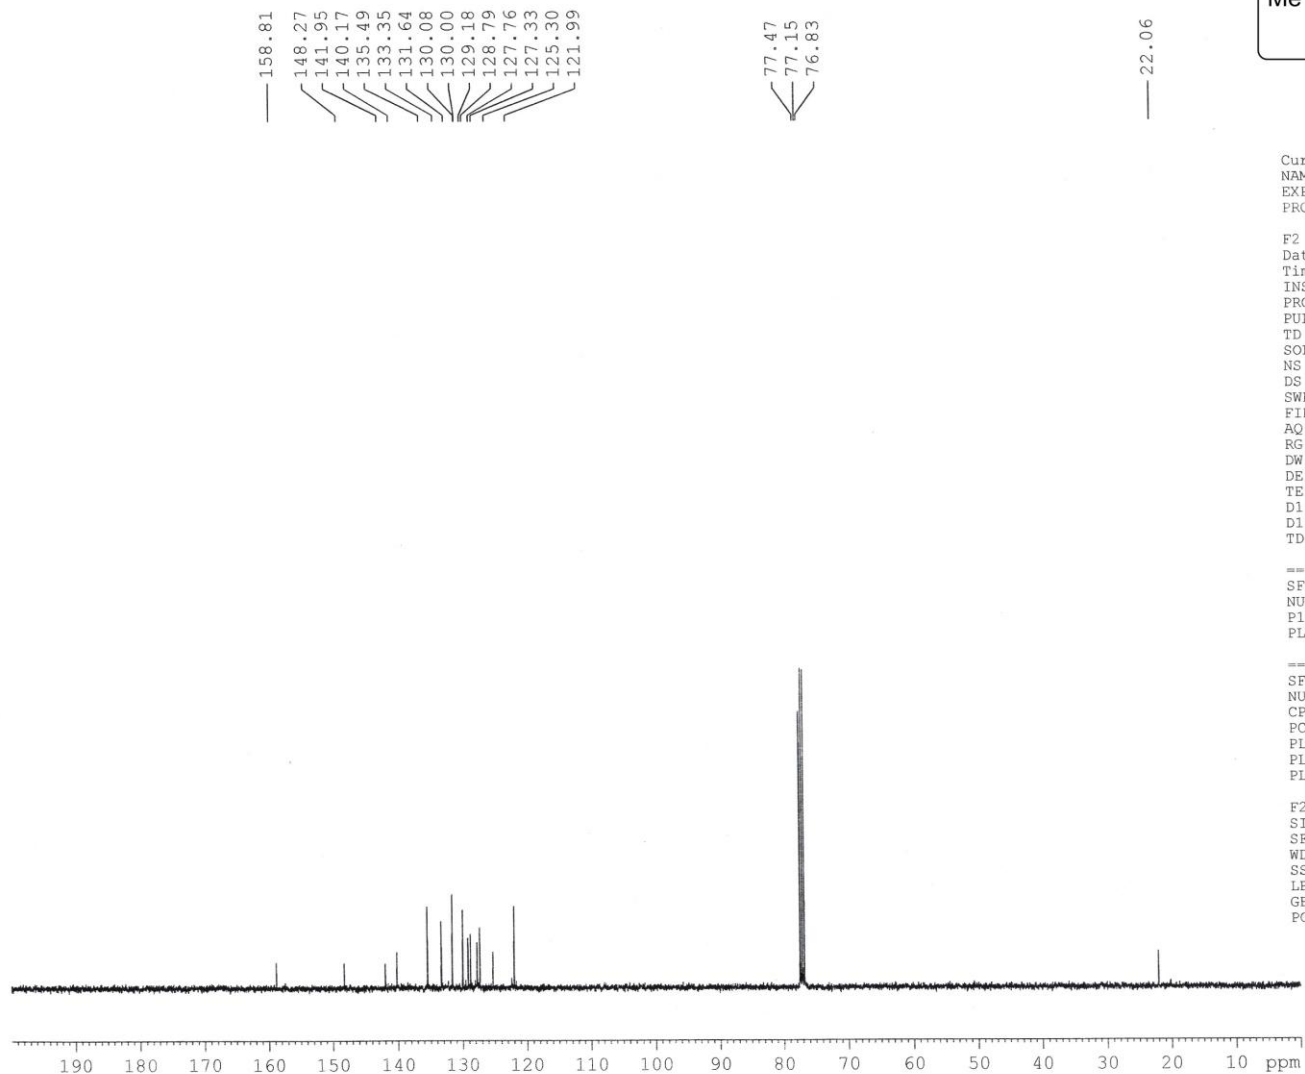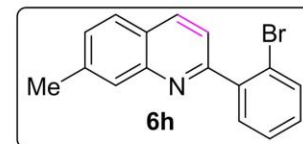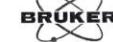

Current Data Parameters  
 NAME Dr. A MAJEE 2018  
 EXPNO 767  
 PROCNO 1

F2 - Acquisition Parameters  
 Date\_ 20180924  
 Time\_ 20.31  
 INSTRUM spect  
 PROBHD 5 mm PABBO BB/  
 PULPROG zgpg30  
 TD 32768  
 SOLVENT CDCl3  
 NS 220  
 DS 2  
 SWH 24038.461 Hz  
 FIDRES 0.733596 Hz  
 AQ 0.6815744 sec  
 RG 77.59  
 DW 20.800 usec  
 DE 6.50 usec  
 TE 298.9 K  
 D1 2.0000000 sec  
 D11 0.03000000 sec  
 TDO 1

===== CHANNEL f1 =====  
 SFO1 100.6278588 MHz  
 NUC1 13C  
 P1 8.90 usec  
 PLW1 54.00000000 W

===== CHANNEL f2 =====  
 SFO2 400.1516006 MHz  
 NUC2 1H  
 CPDPRG[2] waltz16  
 PCPD2 90.00 usec  
 PLW2 12.00000000 W  
 PLW12 0.32231000 W  
 PLW13 0.16212000 W

F2 - Processing parameters  
 SI 16384  
 SF 100.6177859 MHz  
 WDW EM  
 SSB 0  
 LB 1.00 Hz  
 GB 0  
 PC 2.00

1H of VBSSM 423/4

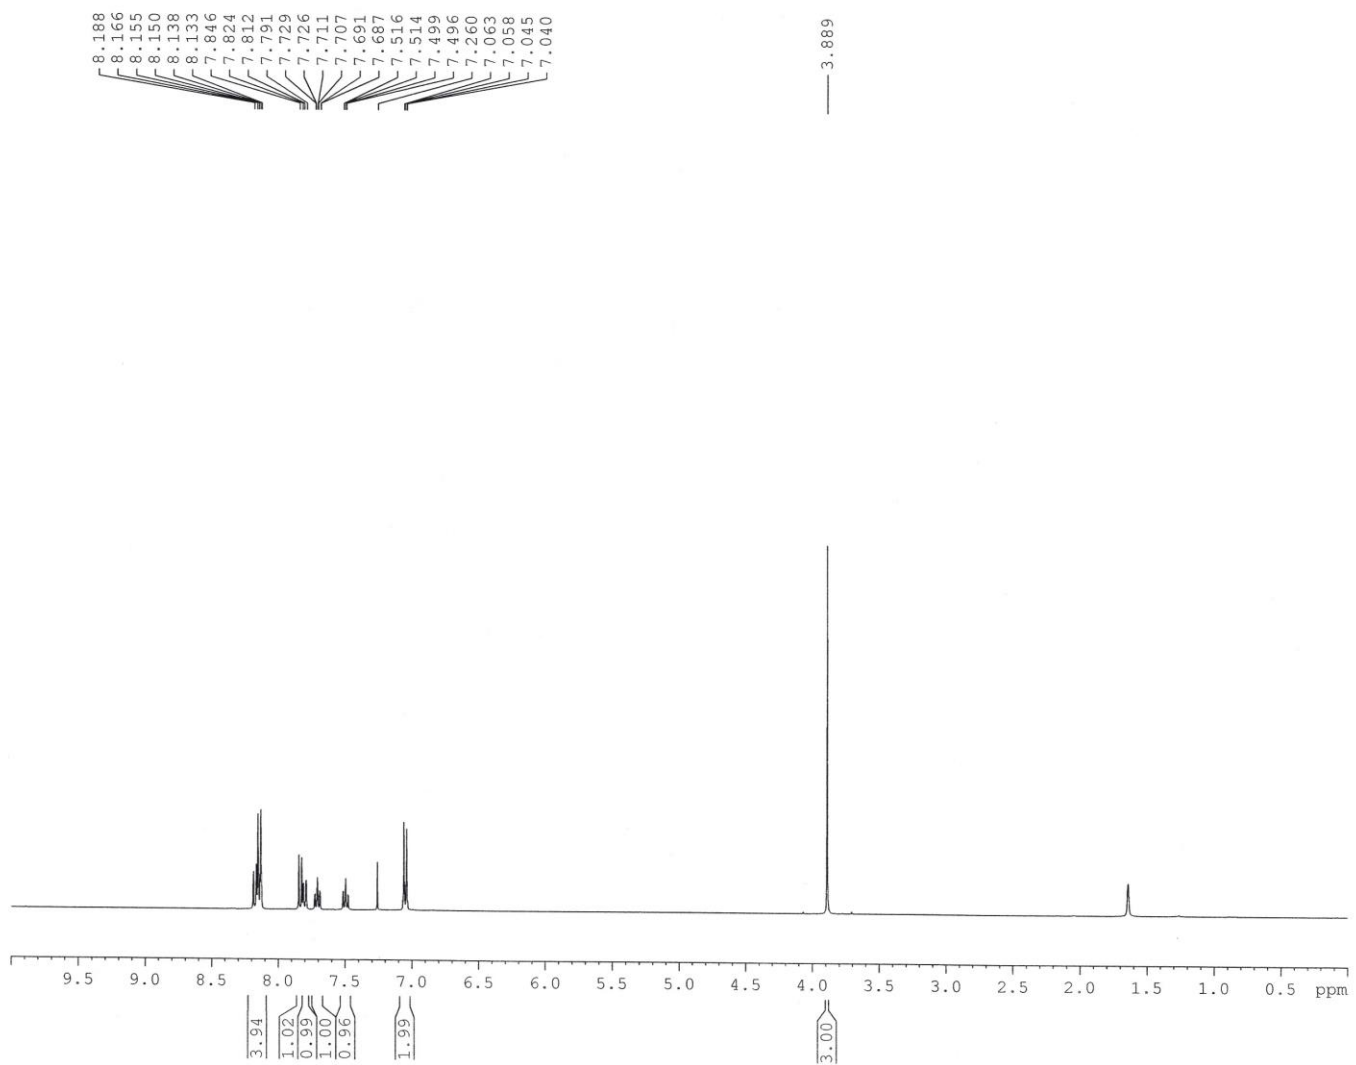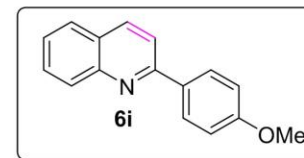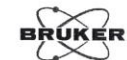

Current Data Parameters  
NAME Dr. A MAJEE 2018  
EXPNO 467  
PROCNO 1

F2 - Acquisition Parameters  
Date\_ 20180531  
Time\_ 20.50  
INSTRUM spect  
PROBHD 5 mm PABBO BB/  
PULPROG zg30  
TD 32768  
SOLVENT CDCl3  
NS 16  
DS 1  
SWH 8223.685 Hz  
FIDRES 0.250967 Hz  
AQ 1.9922944 sec  
RG 186.42  
DW 60.800 usec  
DE 6.50 usec  
TE 300.2 K  
D1 1.00000000 sec  
TD0 1

===== CHANNEL f1 =====  
SFO1 400.1524711 MHz  
NUC1 1H  
P1 14.75 usec  
PLW1 12.00000000 W

F2 - Processing parameters  
SI 16384  
SF 400.1500096 MHz  
WDW EM  
SSB 0  
LB 0.30 Hz  
GB 0  
PC 1.00

13C of VBSSM 423/4

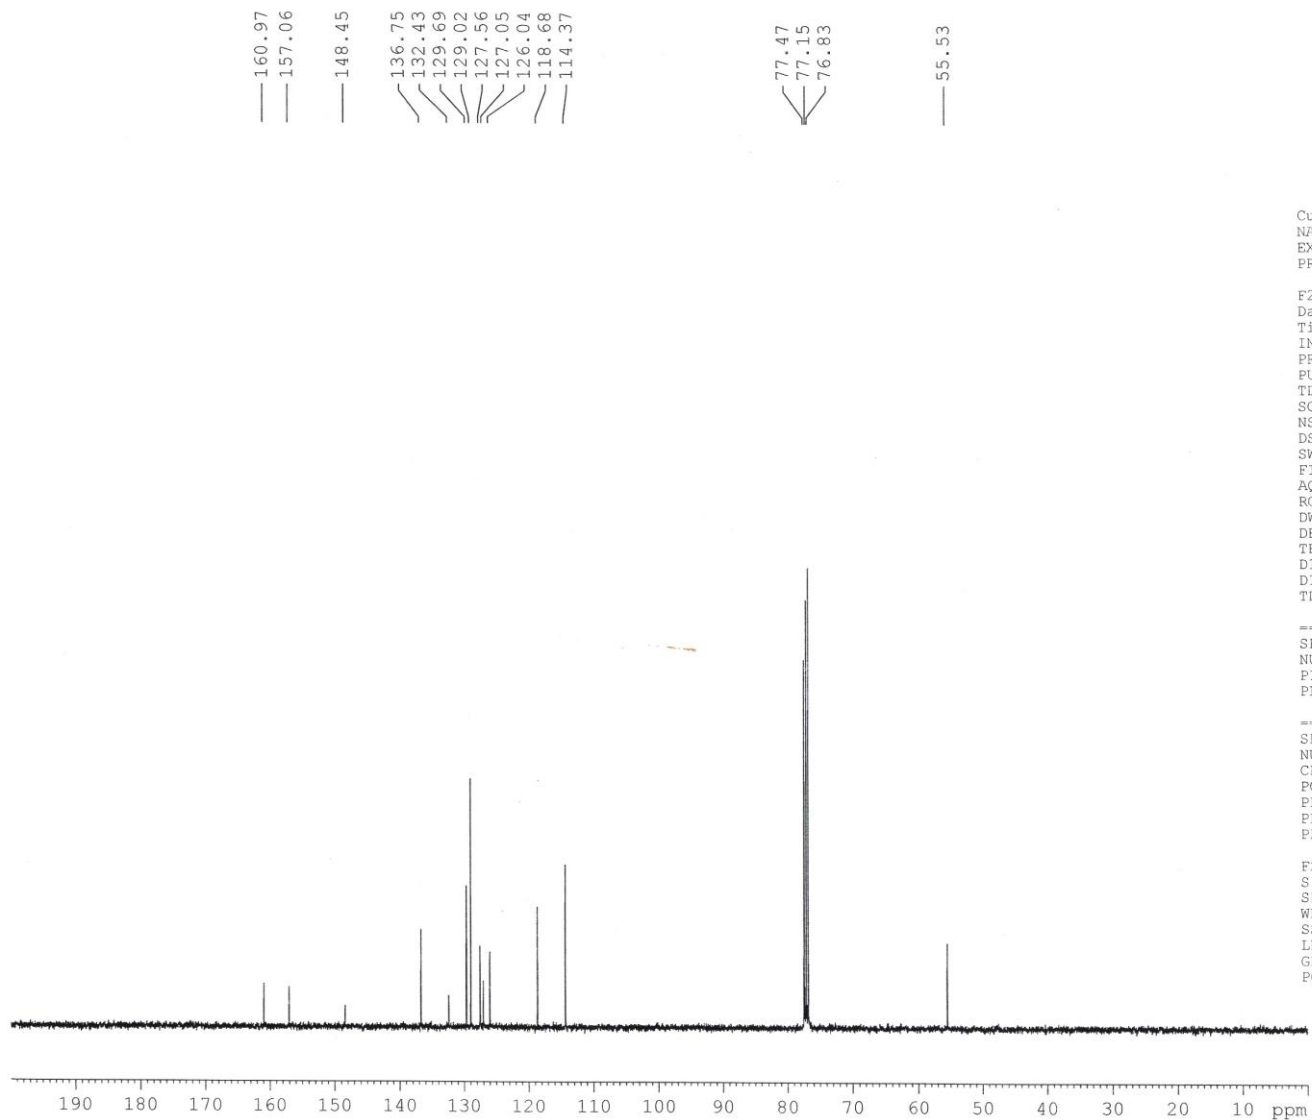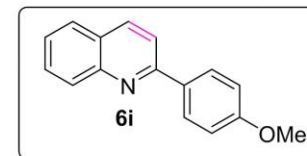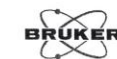

Current Data Parameters  
NAME Dr. A MAJEE 2018  
EXPNO 468  
PROCNO 1

F2 - Acquisition Parameters  
Date\_ 20180531  
Time 21.14  
INSTRUM spect  
PROBHD 5 mm PABBO BB/  
PULPROG zgpg30  
TD 32768  
SOLVENT CDCl3  
NS 480  
DS 2  
SWH 24038.461 Hz  
FIDRES 0.733596 Hz  
AQ 0.6815744 sec  
RG 186.42  
DW 20.800 usec  
DE 6.50 usec  
TE 301.0 K  
D1 2.00000000 sec  
D11 0.03000000 sec  
TD0 1

===== CHANNEL f1 =====  
SFO1 100.6278588 MHz  
NUC1 13C  
P1 8.90 usec  
PLW1 54.00000000 W

===== CHANNEL f2 =====  
SFO2 400.1516006 MHz  
NUC2 1H  
CPDPRG[2] waltz16  
PCPD2 90.00 usec  
PLW2 12.00000000 W  
PLW12 0.32231000 W  
PLW13 0.16212000 W

F2 - Processing parameters  
SI 16384  
SF 100.6177840 MHz  
WDW EM  
SSB 0  
LB 1.00 Hz  
GB 0  
PC 2.00

1H of VBSSM 423/9

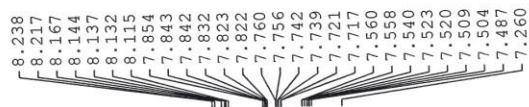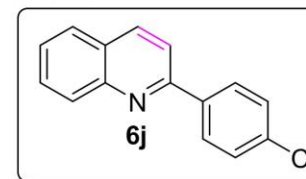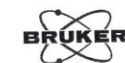

Current Data Parameters  
NAME Dr. A MAJEE 2018  
EXPNO 550  
PROCNO 1

F2 - Acquisition Parameters  
Date\_ 20181208  
Time\_ 17.28  
INSTRUM spect  
PROBHD 5 mm PABBO BB/  
PULPROG zg30  
TD 32768  
SOLVENT CDCl3  
NS 12  
DS 1  
SWH 8223.685 Hz  
FIDRES 0.250967 Hz  
AQ 1.9922944 sec  
RG 120.16  
DW 60.800 usec  
DE 6.50 usec  
TE 297.8 K  
D1 1.00000000 sec  
TDO 1

===== CHANNEL f1 =====  
SFO1 400.1524711 MHz  
NUC1 1H  
P1 14.75 usec  
PLW1 12.00000000 W

F2 - Processing parameters  
SI 16384  
SF 400.1500097 MHz  
WDW EM  
SSB 0  
LB 0.30 Hz  
GB 0  
PC 1.00

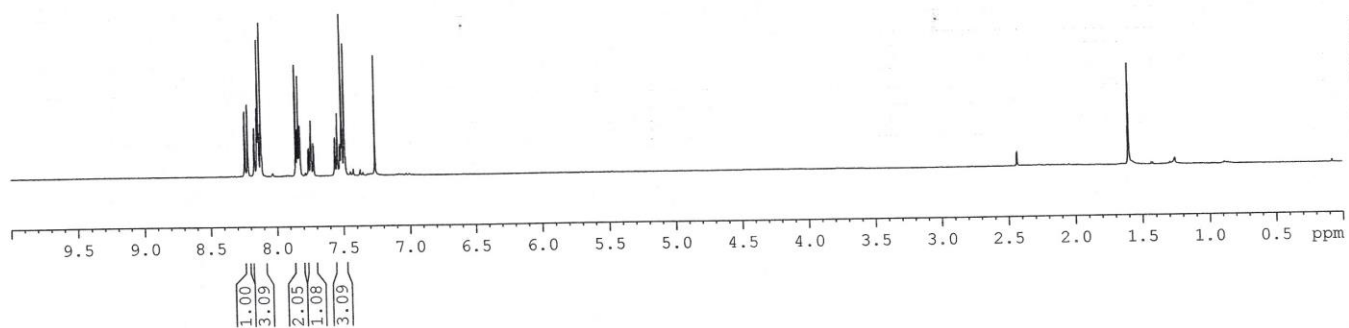

156.16  
 148.38  
 138.20  
 137.10  
 135.68  
 129.98  
 129.85  
 129.15  
 128.96  
 127.62  
 127.36  
 126.64  
 118.70

77.47  
 77.15  
 76.83

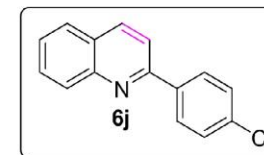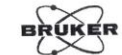

Current Data Parameters  
 NAME Dr. A MAJEE 2018  
 EXPNO 551  
 PROCNO 1

F2 - Acquisition Parameters  
 Date\_ 20181208  
 Time\_ 17.59  
 INSTRUM spect  
 PROBHD 5 mm PABBO BB/  
 PULPROG zgpg30  
 TD 32768  
 SOLVENT CDC13  
 NS 640  
 DS 2  
 SWH 24038.461 Hz  
 FIDRES 0.733596 Hz  
 AQ 0.6815744 sec  
 RG 77.59  
 DW 20.800 usec  
 DE 6.50 usec  
 TE 297.8 K  
 D1 2.0000000 sec  
 D11 0.0300000 sec  
 TDO 1

===== CHANNEL f1 =====  
 SFO1 100.6278588 MHz  
 NUC1 13C  
 P1 8.90 usec  
 PLW1 54.00000000 W

===== CHANNEL f2 =====  
 SFO2 400.1516006 MHz  
 NUC2 1H  
 CPDPRG[2] waltz16  
 PCPD2 90.00 usec  
 PLW2 12.00000000 W  
 PLW12 0.32231000 W  
 PLW13 0.16212000 W

F2 - Processing parameters  
 SI 16384  
 SF 100.6177846 MHz  
 WDW EM  
 SSB 0  
 LB 1.00 Hz  
 GB 0  
 PC 2.00

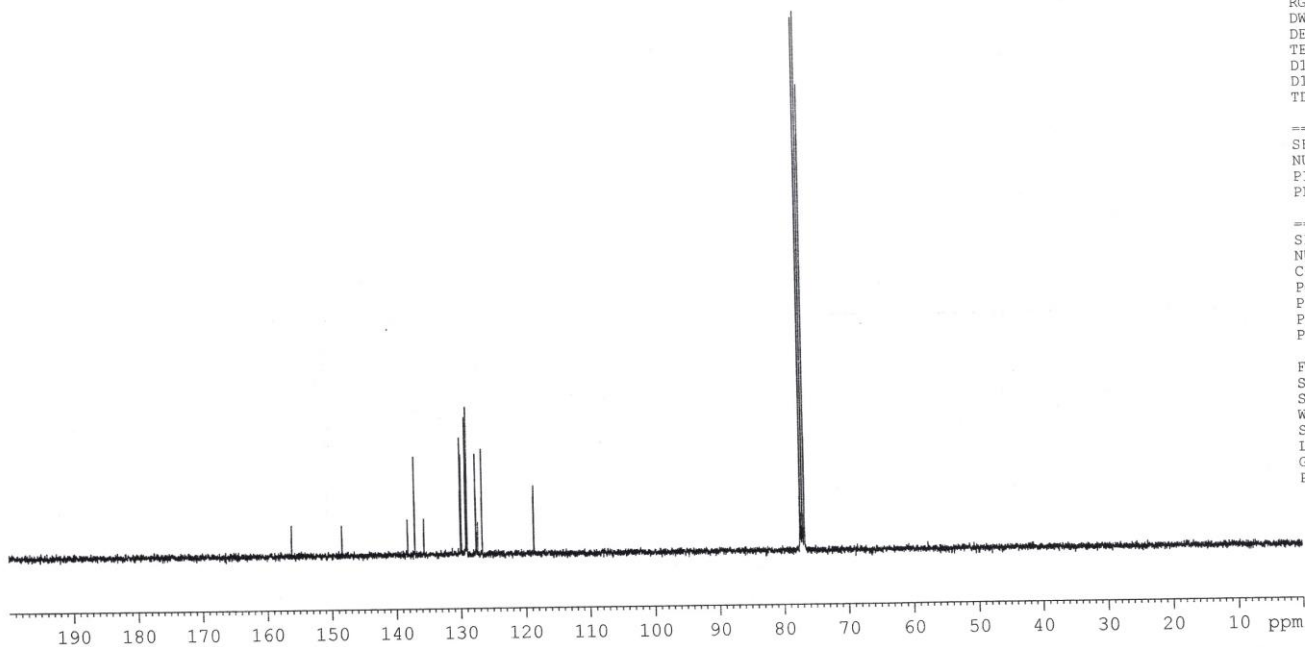



1H of VBSSM-423/74

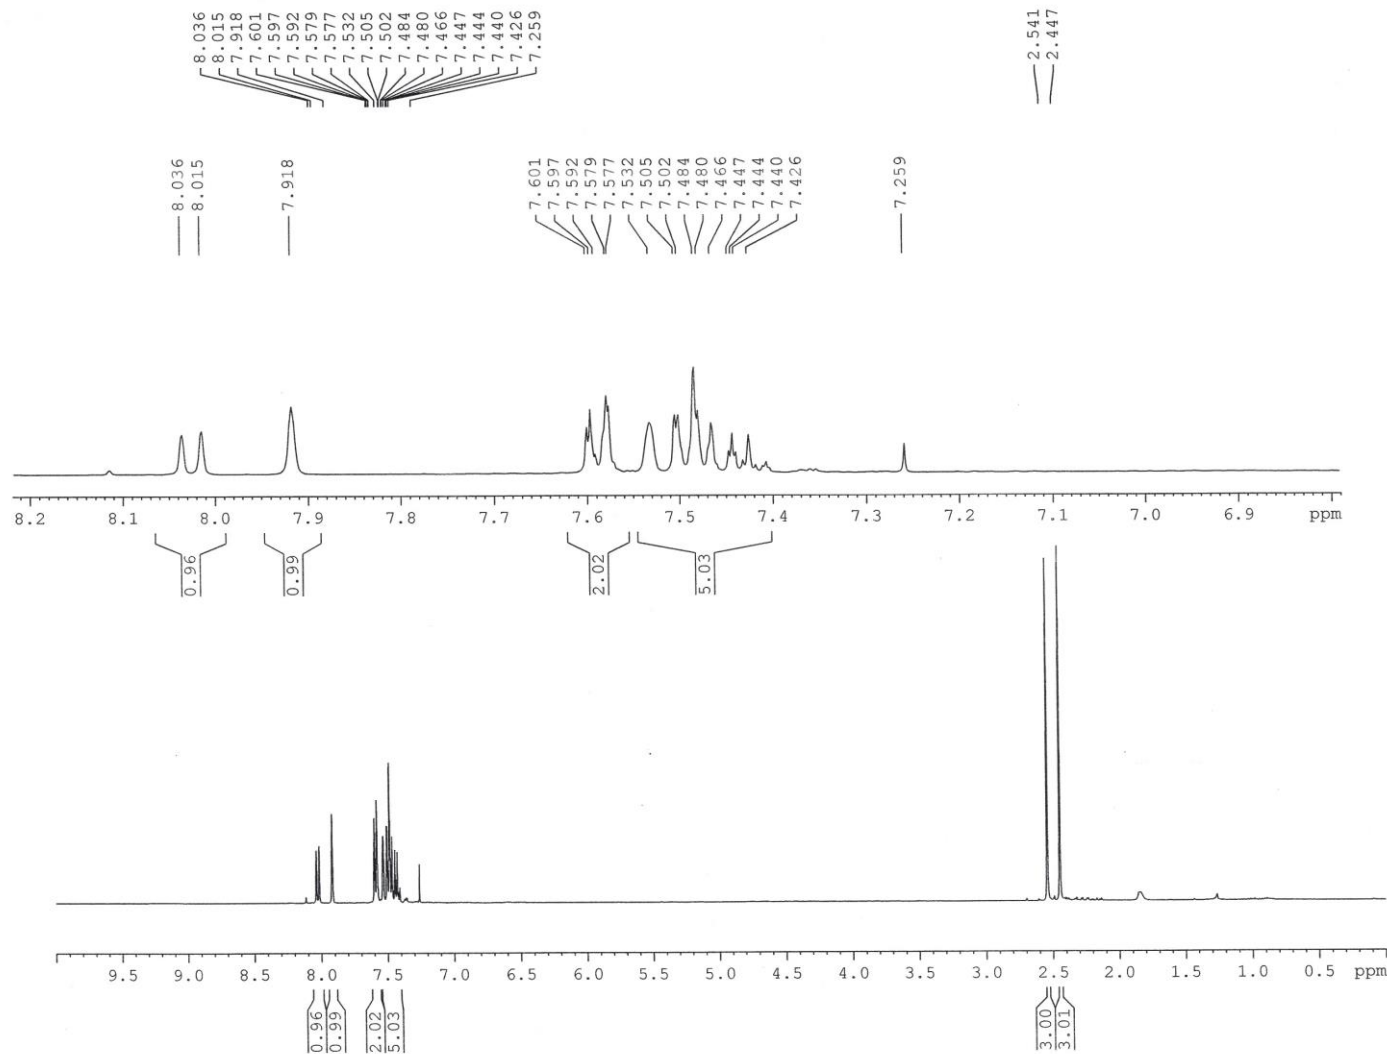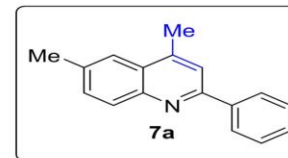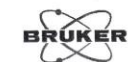

Current Data Parameters  
 NAME Dr. A MAJEE 2018  
 EXPNO 894  
 PROCNO 1

F2 - Acquisition Parameters  
 Date\_ 20181213  
 Time 18.48  
 INSTRUM spect  
 PROBHD 5 mm PABBO BB/  
 PULPROG zg30  
 TD 32768  
 SOLVENT CDCl3  
 NS 16  
 DS 1  
 SWH 8223.685 Hz  
 FIDRES 0.250967 Hz  
 AQ 1.9922944 sec  
 RG 77.59  
 DW 60.800 usec  
 DE 6.50 usec  
 TE 296.5 K  
 D1 1.00000000 sec  
 TD0 1

===== CHANNEL f1 =====  
 SFO1 400.1524711 MHz  
 NUC1 1H  
 P1 14.75 usec  
 PLW1 12.00000000 W

F2 - Processing parameters  
 SI 16384  
 SF 400.1500097 MHz  
 WDW EM  
 SSB 0  
 LB 0.30 Hz  
 GB 0  
 PC 1.00

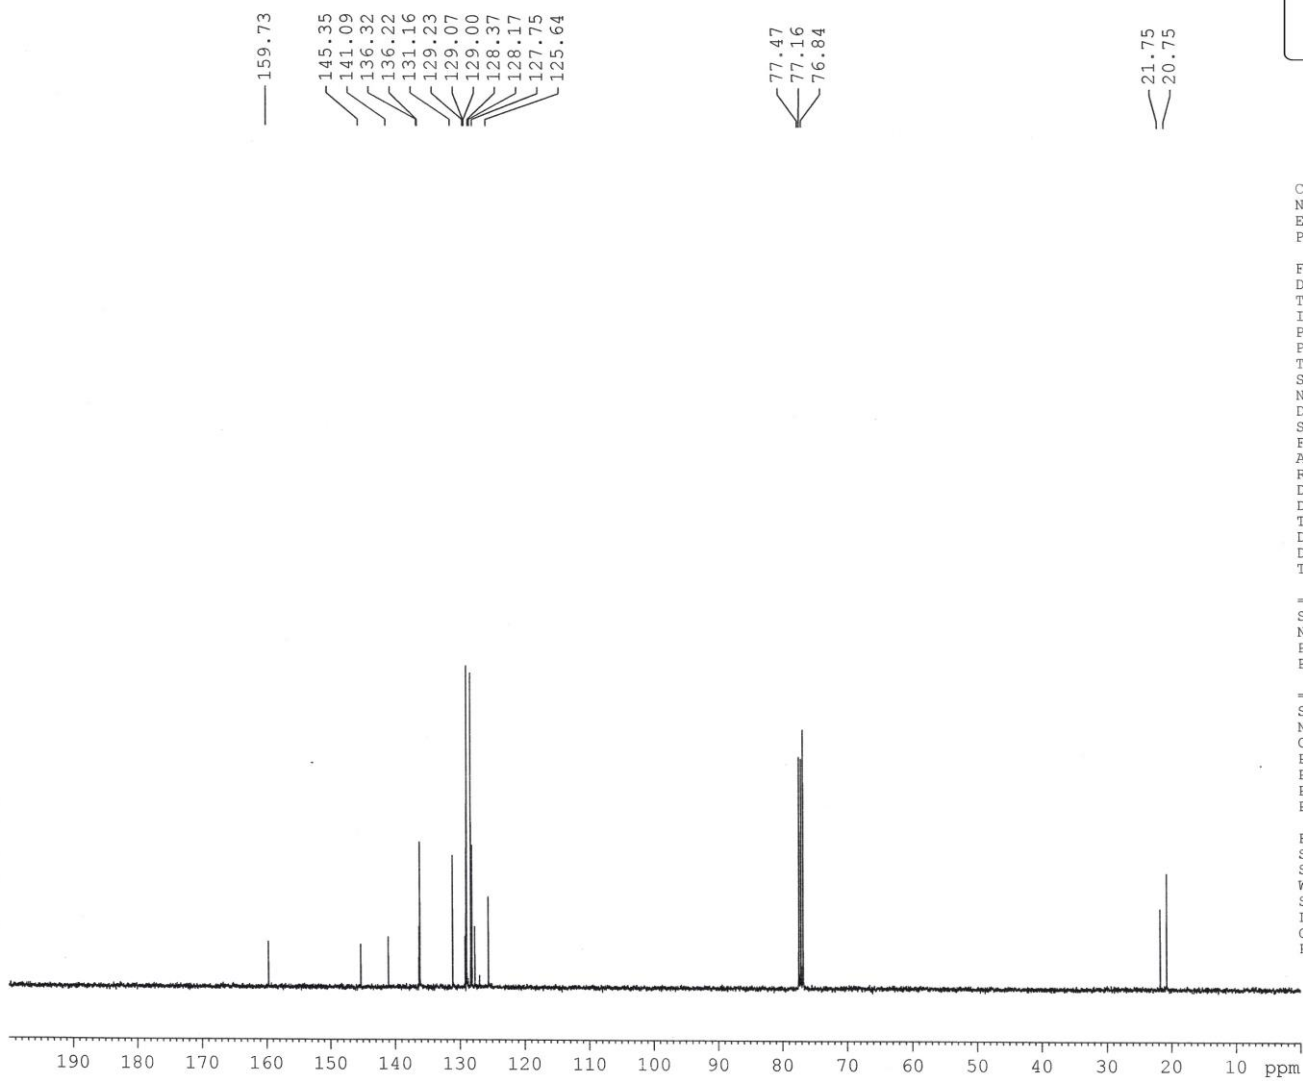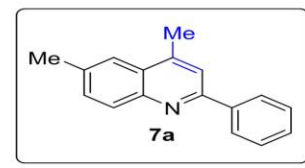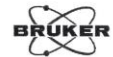

Current Data Parameters  
 NAME Dr. A MAJEE 2018  
 EXPNO 895  
 PROCNO 1

F2 - Acquisition Parameters  
 Date\_ 20181213  
 Time 19.02  
 INSTRUM spect  
 PROBHD 5 mm PABBO BB/  
 PULPROG zgpg30  
 TD 32768  
 SOLVENT CDCl3  
 NS 256  
 DS 2  
 SWH 24038.461 Hz  
 FIDRES 0.733596 Hz  
 AQ 0.6815744 sec  
 RG 186.42  
 DW 20.800 usec  
 DE 6.50 usec  
 TE 297.1 K  
 D1 2.00000000 sec  
 D11 0.03000000 sec  
 TD0 1

===== CHANNEL f1 =====  
 SFO1 100.6278588 MHz  
 NUC1 13C  
 P1 8.90 usec  
 PLW1 54.00000000 W

===== CHANNEL f2 =====  
 SFO2 400.1516006 MHz  
 NUC2 1H  
 CPDPRG[2] waltz16  
 PCPD2 90.00 usec  
 PLW2 12.00000000 W  
 PLW12 0.32231000 W  
 PLW13 0.16212000 W

F2 - Processing parameters  
 SI 16384  
 SF 100.6177877 MHz  
 WDW EM  
 SSB 0  
 LB 1.00 Hz  
 GB 0  
 PC 2.00

1H of VBSSM-423/68

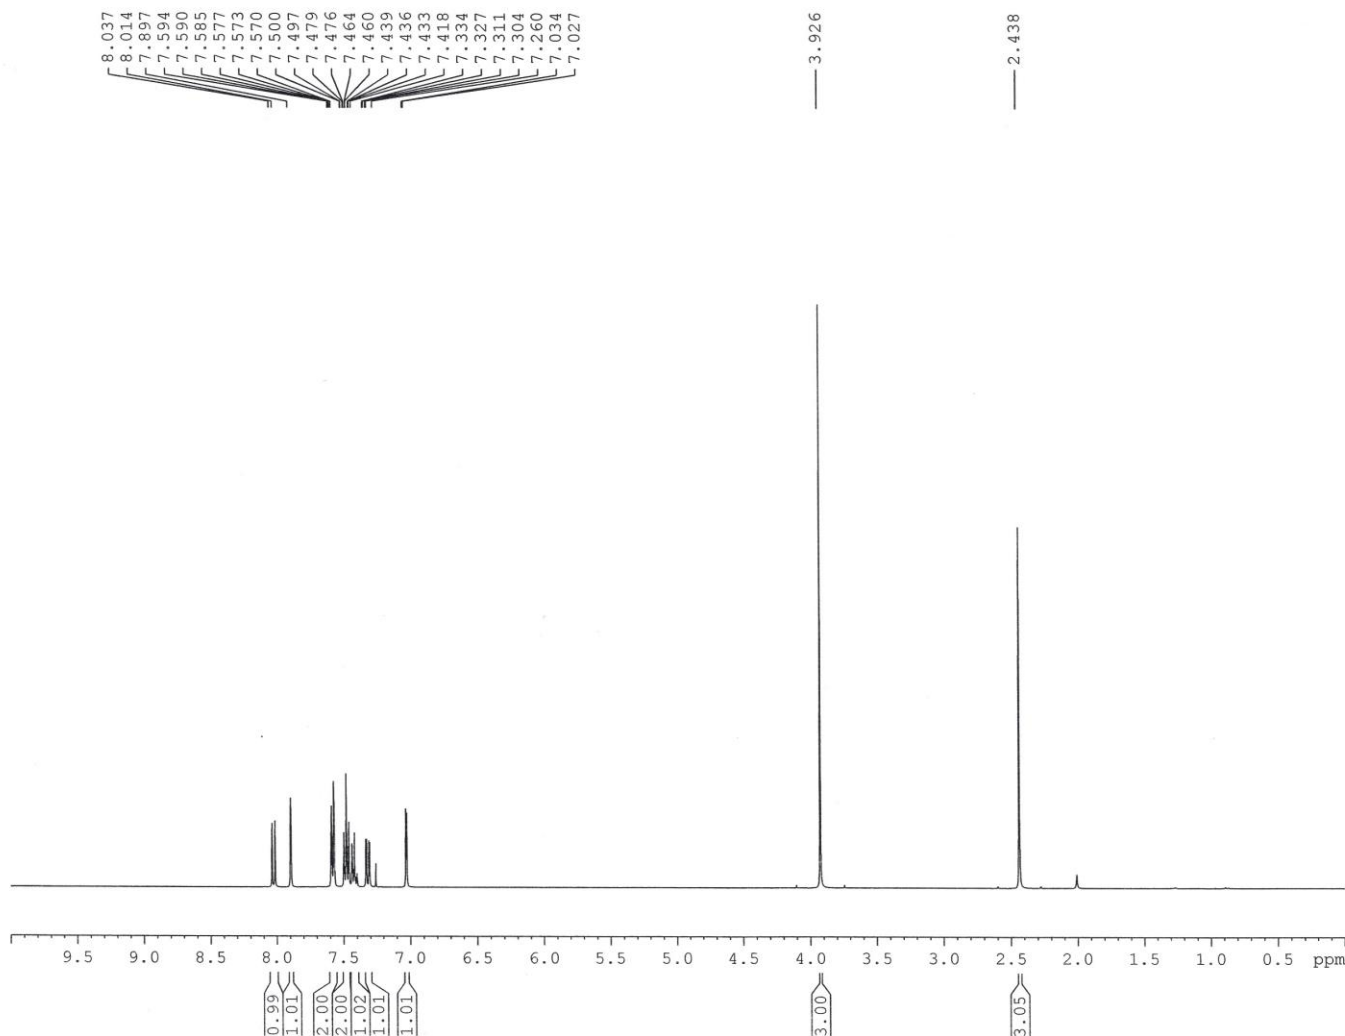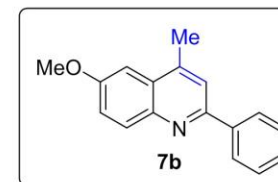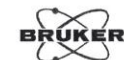

Current Data Parameters  
NAME Dr. A MAJEE 2018  
EXPNO 863  
PROCNO 1

F2 - Acquisition Parameters  
Date\_ 20181210  
Time 18.36  
INSTRUM spect  
PROBHD 5 mm PABBO BB/  
PULPROG zg30  
TD 32768  
SOLVENT CDC13  
NS 16  
DS 1  
SWH 8223.685 Hz  
FIDRES 0.250967 Hz  
AQ 1.9922944 sec  
RG 57.28  
DW 60.800 usec  
DE 6.50 usec  
TE 294.1 K  
D1 1.00000000 sec  
TD0 1

===== CHANNEL f1 =====  
SFO1 400.1524711 MHz  
NUC1 1H  
P1 14.75 usec  
PLW1 12.00000000 W

F2 - Processing parameters  
SI 16384  
SF 400.1500095 MHz  
WDW EM  
SSE 0  
LB 0.30 Hz  
GB 0  
PC 1.00

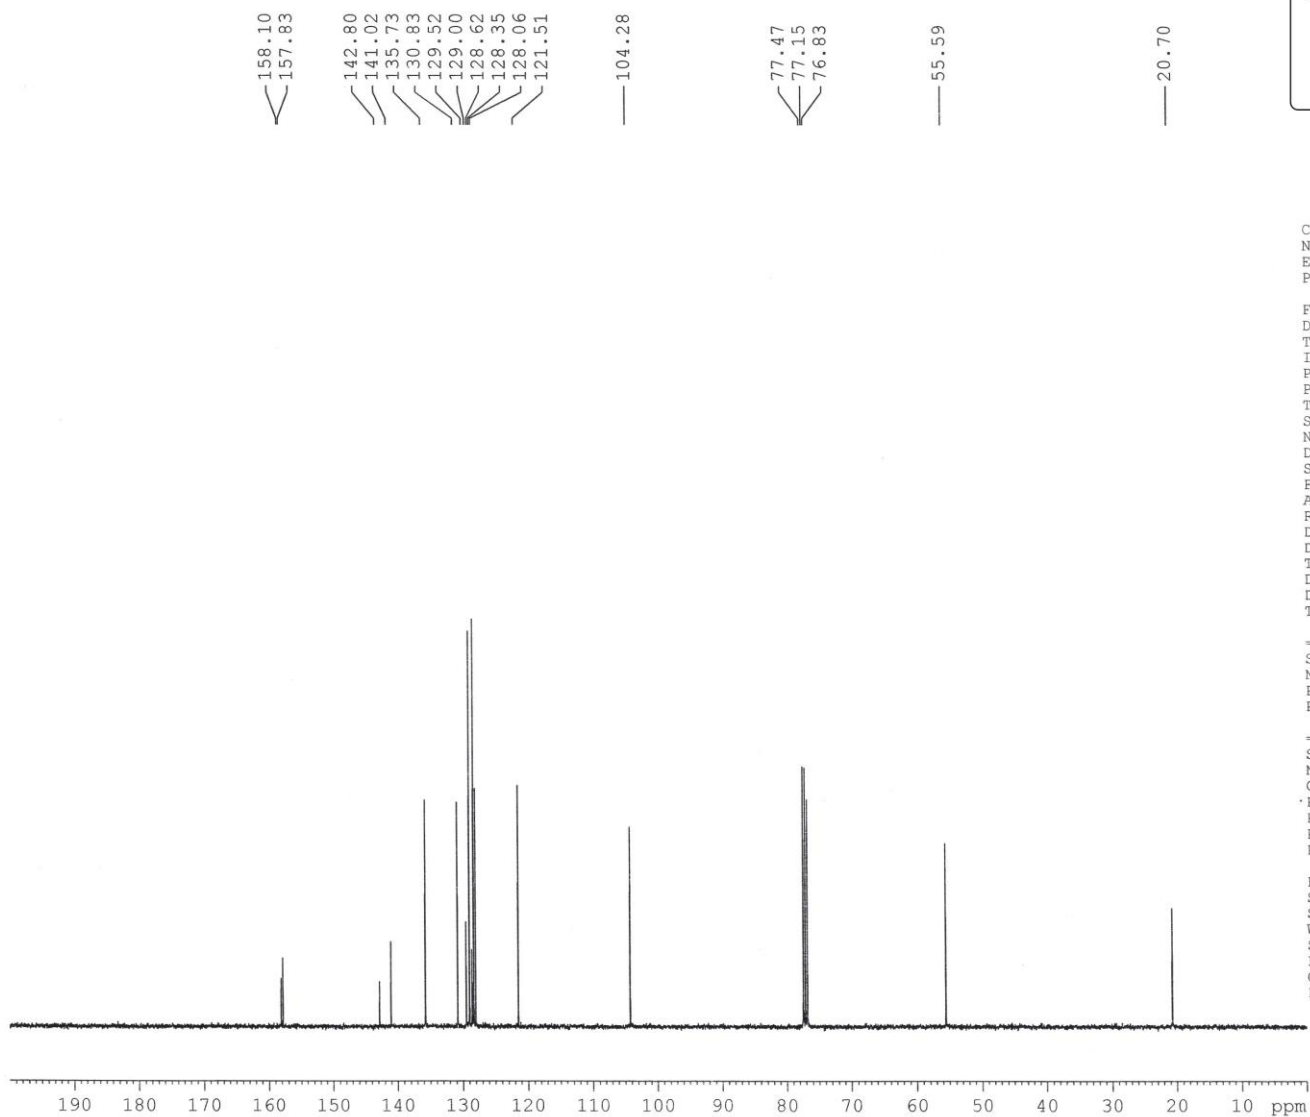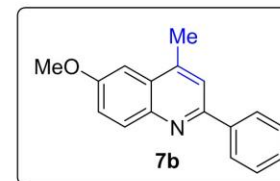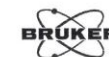

Current Data Parameters  
 NAME Dr. A MAJEE 2018  
 EXPNO 868  
 PROCNO 1

F2 - Acquisition Parameters  
 Date\_ 20181210  
 Time 18.48  
 INSTRUM spect  
 PROBHD 5 mm PABBO BB/  
 PULPROG zgpg30  
 TD 32768  
 SOLVENT CDCl3  
 NS 220  
 DS 2  
 SWH 24038.461 Hz  
 FIDRES 0.733596 Hz  
 AQ 0.6815744 sec  
 RG 186.42  
 DW 20.800 usec  
 DE 6.50 usec  
 TE 294.6 K  
 D1 2.0000000 sec  
 D11 0.0300000 sec  
 TD0 1

==== CHANNEL f1 =====  
 SFO1 100.6278588 MHz  
 NUC1 13C  
 P1 8.90 usec  
 PLW1 54.0000000 W

==== CHANNEL f2 =====  
 SFO2 400.1516006 MHz  
 NUC2 1H  
 CPDPRG[2] waltz16  
 PCPD2 90.00 usec  
 PLW2 12.0000000 W  
 PLW12 0.32231000 W  
 PLW13 0.16212000 W

F2 - Processing parameters  
 SI 16384  
 SF 100.6177917 MHz  
 WDW EM  
 SSB 0  
 LB 1.00 Hz  
 GB 0  
 PC 2.00

1H of VBSSM-423/77

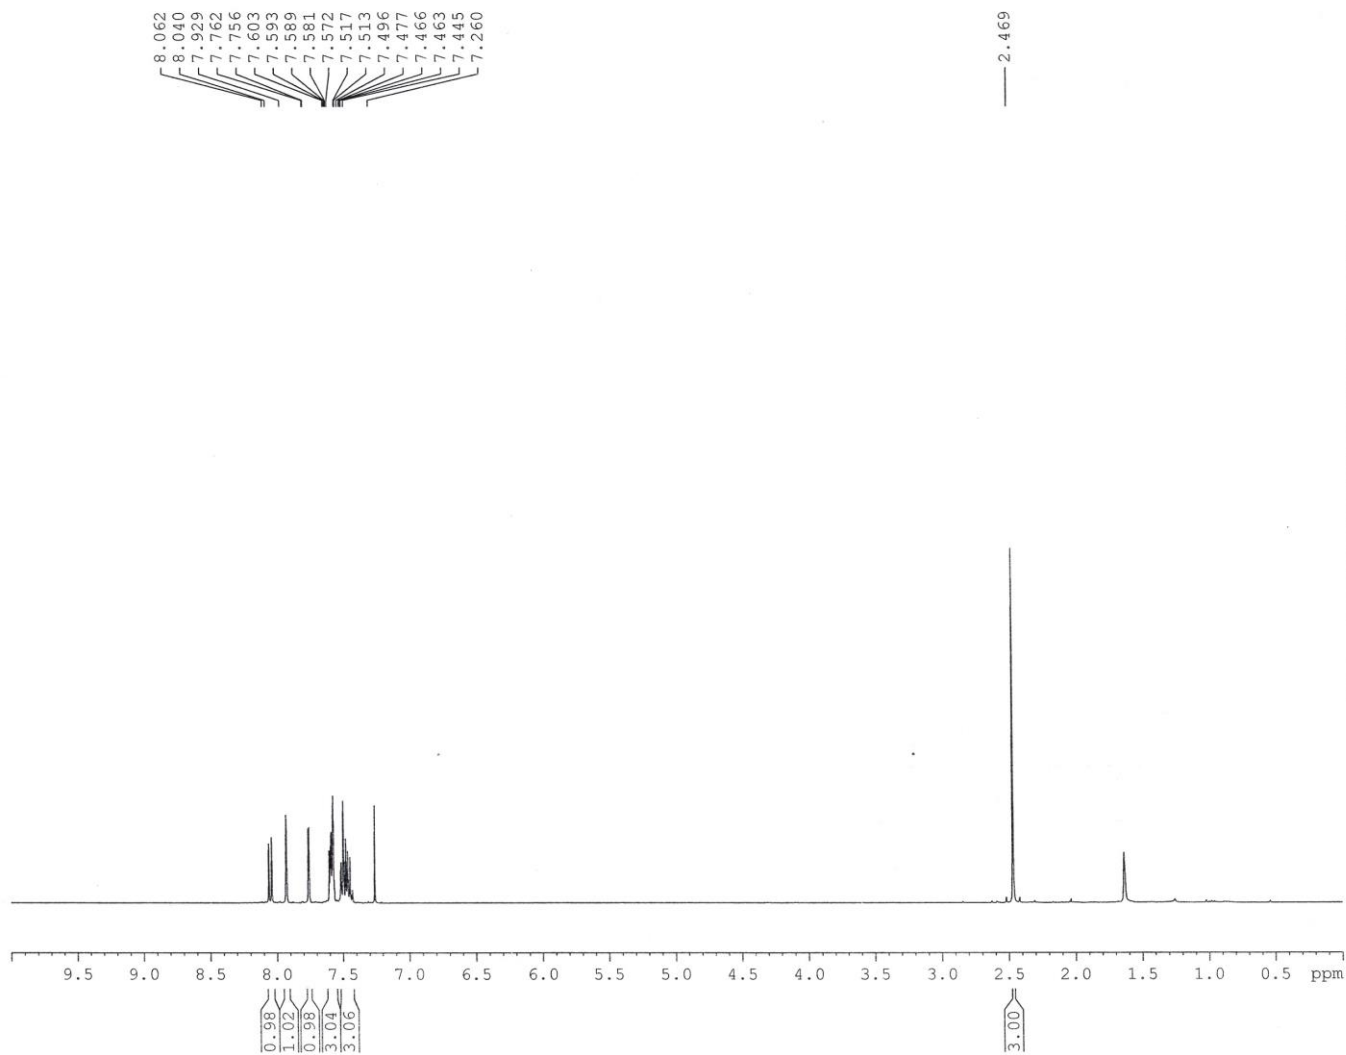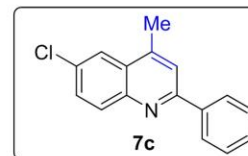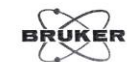

Current Data Parameters  
NAME Dr. A MAJEE 2018  
EXPNO 909  
PROCNO 1

F2 - Acquisition Parameters  
Date\_ 20181220  
Time 17.52  
INSTRUM spect  
PROBHD 5 mm PABBO BB/  
PULPROG zg30  
TD 32768  
SOLVENT CDCl3  
NS 16  
DS 1  
SWH 8223.685 Hz  
FIDRES 0.250967 Hz  
AQ 1.9922944 sec  
RG 168.31  
DW 60.800 usec  
DE 6.50 usec  
TE 297.2 K  
D1 1.00000000 sec  
TD0 1

==== CHANNEL f1 =====  
SF01 400.1524711 MHz  
NUC1 1H  
P1 14.75 usec  
PLW1 12.00000000 W

F2 - Processing parameters  
SI 16384  
SF 400.1500096 MHz  
WDW EM  
SSB 0  
LB 0.30 Hz  
GB 0  
PC 1.00

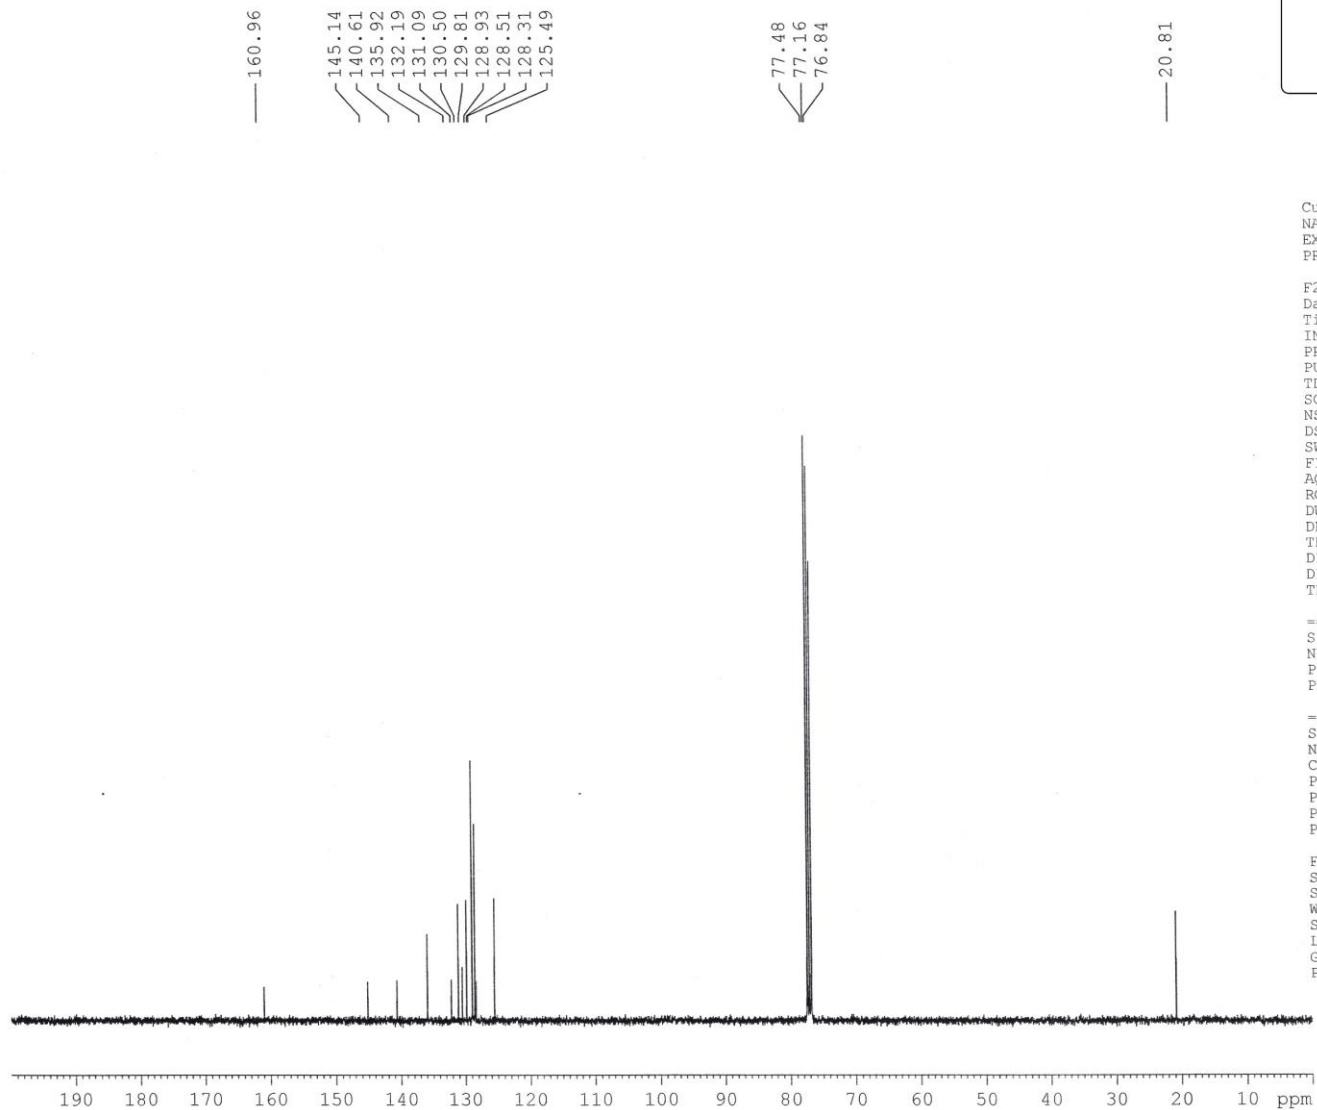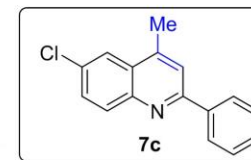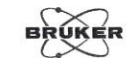

Current Data Parameters  
 NAME Dr. A MAJEE 2018  
 EXPNO 910  
 PROCNO 1

F2 - Acquisition Parameters  
 Date\_ 20181220  
 Time\_ 18.18  
 INSTRUM spect  
 PROBHD 5 mm PABBO BB/  
 PULPROG zgpg30  
 TD 32768  
 SOLVENT CDCl3  
 NS 512  
 DS 2  
 SWH 24038.461 Hz  
 FIDRES 0.733596 Hz  
 AQ 0.6815744 sec  
 RG 186.42  
 DW 20.800 usec  
 DE 6.50 usec  
 TE 298.1 K  
 D1 2.00000000 sec  
 D11 0.03000000 sec  
 TD0 1

===== CHANNEL f1 =====  
 SFO1 100.6278588 MHz  
 NUC1 13C  
 P1 8.90 usec  
 PLW1 54.00000000 W

===== CHANNEL f2 =====  
 SFO2 400.1516006 MHz  
 NUC2 1H  
 CPDPRG[2] waltz16  
 PCPD2 90.00 usec  
 PLW2 12.00000000 W  
 PLW12 0.32231000 W  
 PLW13 0.16212000 W

F2 - Processing parameters  
 SI 16384  
 SF 100.6177841 MHz  
 WDW EM  
 SSB 0  
 LB 1.00 Hz  
 GB 0  
 PC 2.00

1H of VBSSM 423/86

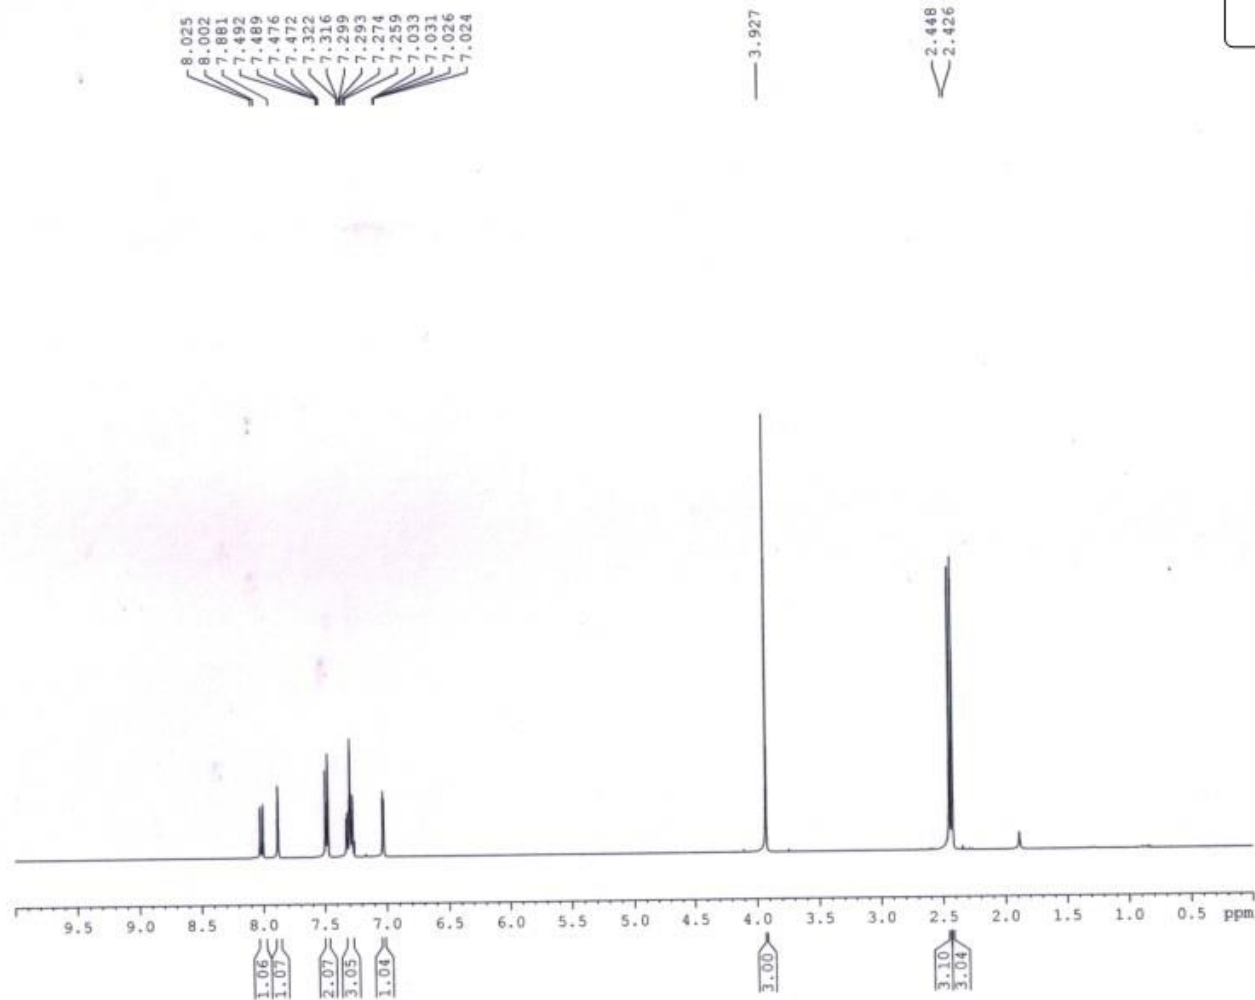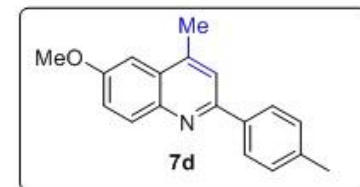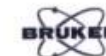

Current Data Parameters  
NAME Dr. A MAJEE 2019  
EXPNO 394  
PROCNO 1

F2 - Acquisition Parameters  
Date\_ 20190722  
Time\_ 10.41  
INSTRUM spect  
PROBHD 5 mm PABBO BB/  
PULPROG zg30  
TD 32768  
SOLVENT CDCl3  
NS 16  
DS 1  
SWH 8223.685 Hz  
FIDRES 0.250967 Hz  
AQ 1.9922944 sec  
RG 87.66  
DW 60.800 usec  
DE 6.50 usec  
TE 304.8 K  
D1 1.00000000 sec  
TDO 1

----- CHANNEL f1 -----  
SFO1 400.1524711 MHz  
NUC1 1H  
P1 14.75 usec  
PLW1 12.00000000 W

F2 - Processing parameters  
SI 16384  
SF 400.1500092 MHz  
WDW EM  
SSB 0  
LB 0.30 Hz  
GB 0  
PC 1.00

13C of VBSSM 423/86

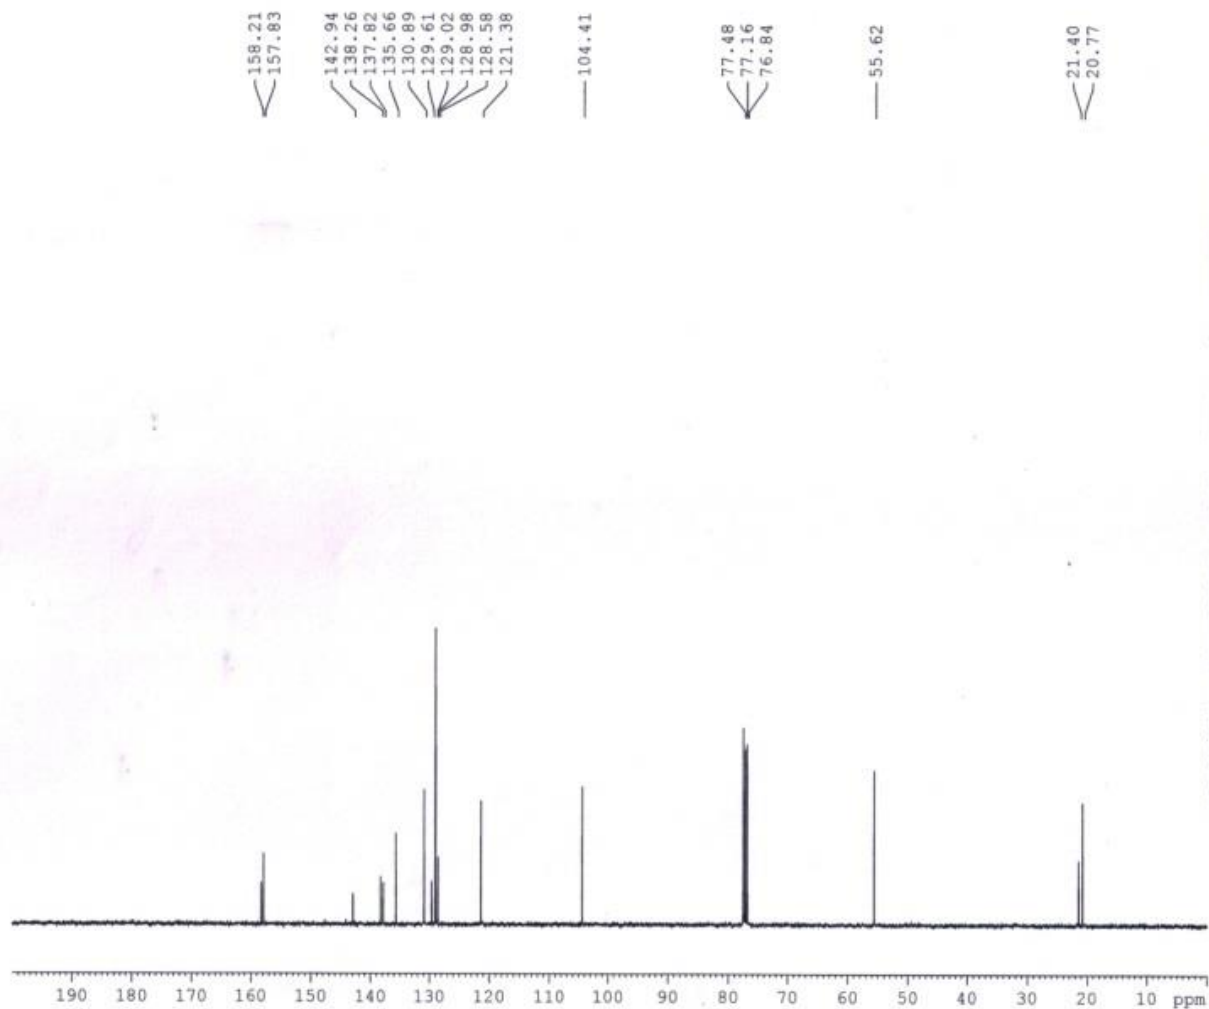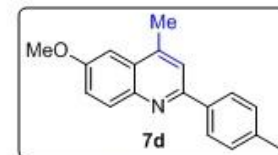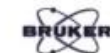

Current Data Parameters  
NAME Dr. A MAJEE 2019  
EXPNO 395  
PROCNO 1

F2 - Acquisition Parameters  
Date\_ 20190722  
Time 10.54  
INSTRUM spect  
PROBRD 5 mm PABBO BB/  
PULPROG zgpg30  
TD 32768  
SOLVENT CDCl3  
NS 256  
DS 2  
SWH 24038.461 Hz  
FIDRES 0.733596 Hz  
AQ 0.6815744 sec  
RG 87.66  
DW 20.800 usec  
DE 6.50 usec  
TE 305.1 K  
D1 2.00000000 sec  
D11 0.03000000 sec  
TDO 1

----- CHANNEL f1 -----  
SFO1 100.6278588 MHz  
NUC1 13C  
P1 8.90 usec  
PLW1 54.00000000 W

----- CHANNEL f2 -----  
SFO2 400.1516006 MHz  
NUC2 1H  
CPDPRG(2) waltz16  
PCPD2 90.00 usec  
PLW2 12.00000000 W  
PLW12 0.32231000 W  
PLW13 0.16212000 W

F2 - Processing parameters  
SI 16384  
SF 100.6177858 MHz  
WDW EM  
SSB 0  
LB 1.00 Hz  
GB 0  
PC 2.00



1H of VBSSM-423/75

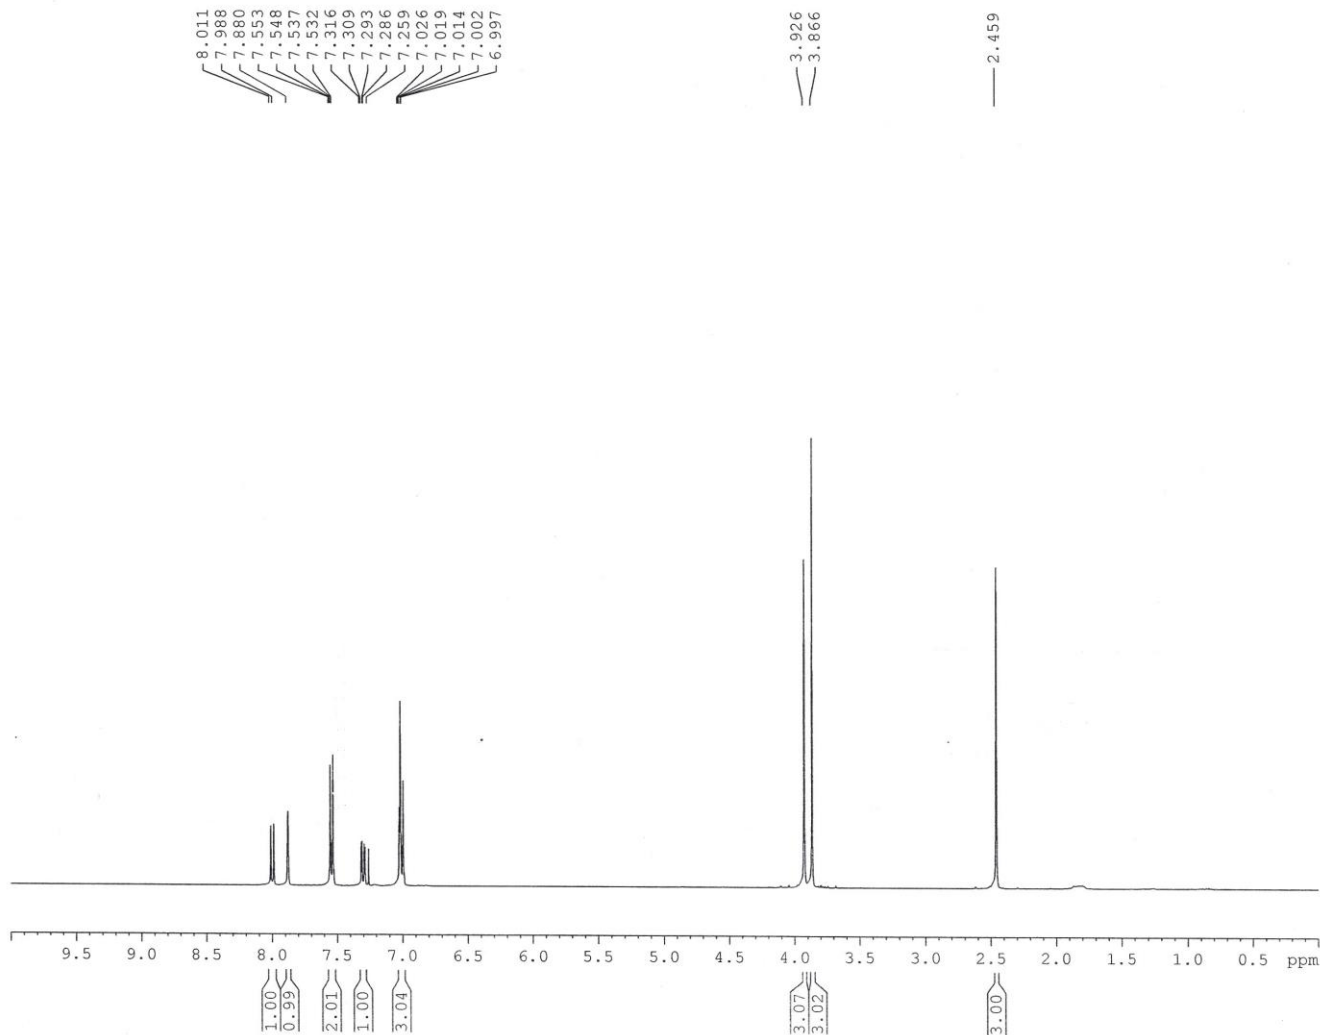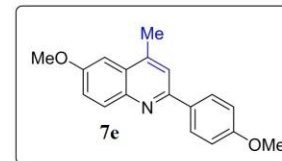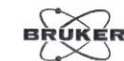

Current Data Parameters  
NAME Dr. A MAJEE 2018  
EXPNO 904  
PROCNO 1

F2 - Acquisition Parameters  
Date\_ 20181214  
Time\_ 17.01  
INSTRUM spect  
PROBHD 5 mm PABBO BB/  
PULPROG zg30  
TD 32768  
SOLVENT CDCl3  
NS 16  
DS 1  
SWH 8223.685 Hz  
FIDRES 0.250967 Hz  
AQ 1.9922944 sec  
RG 77.59  
DW 60.800 usec  
DE 6.50 usec  
TE 299.2 K  
D1 1.00000000 sec  
TD0 1

===== CHANNEL f1 =====  
SFO1 400.1524711 MHz  
NUC1 1H  
P1 14.75 usec  
PLW1 12.00000000 W

F2 - Processing parameters  
SI 16384  
SF 400.1500097 MHz  
WDW EM  
SSB 0  
LB 0.30 Hz  
GB 0  
PC 1.00

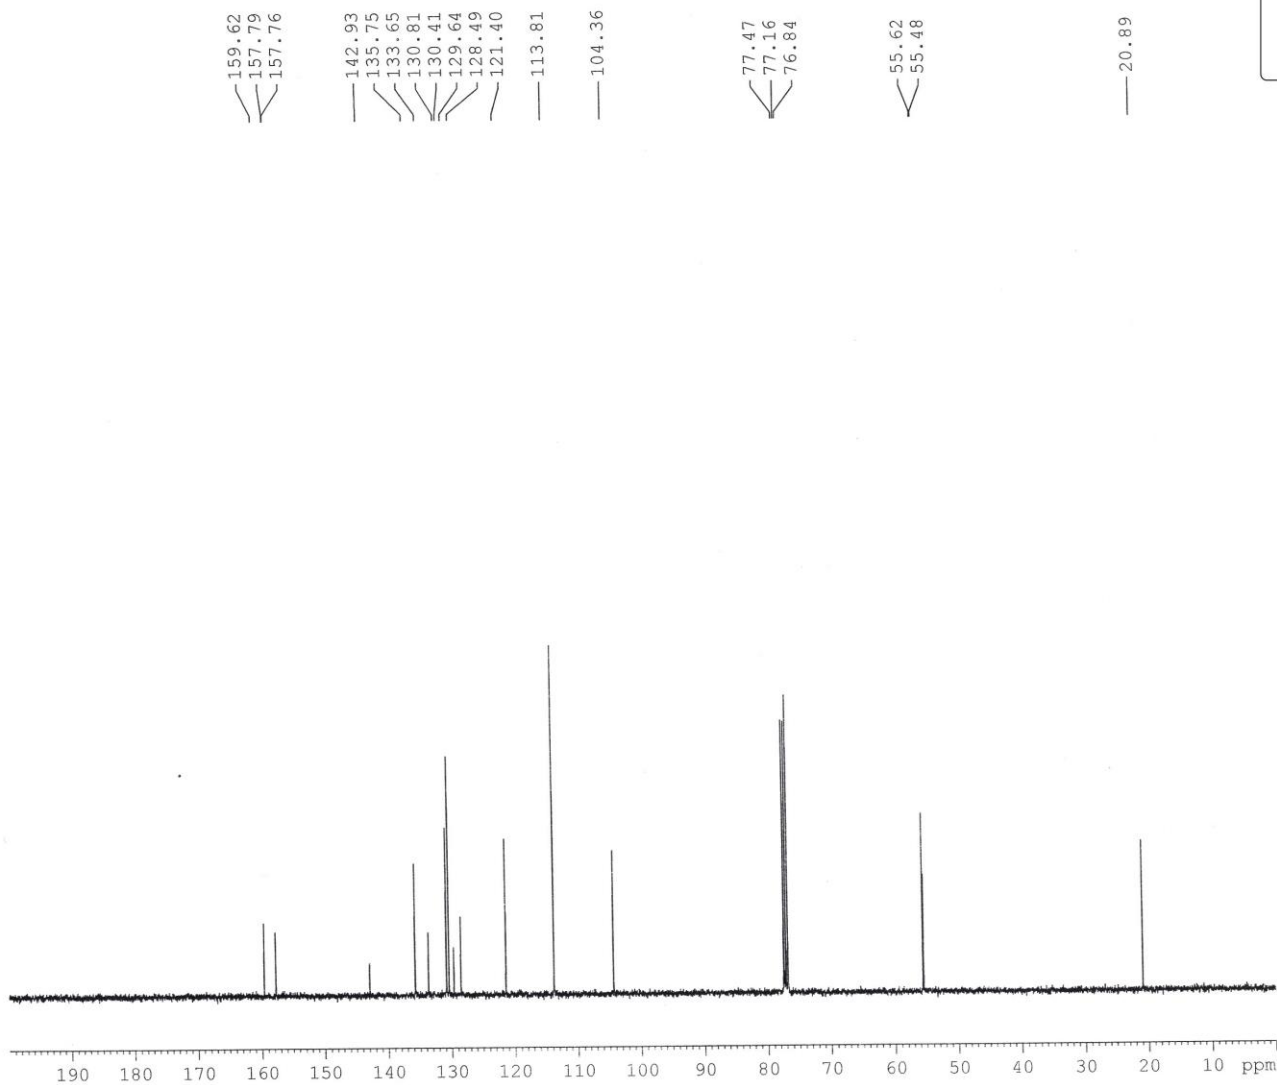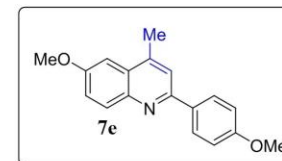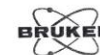

Current Data Parameters  
 NAME Dr. A MAJEE 2018  
 EXPNO 905  
 PROCNO 1

F2 - Acquisition Parameters  
 Date\_ 20181214  
 Time 17.14  
 INSTRUM spect  
 PROBHD 5 mm PABBO BB/  
 PULPROG zgpg30  
 TD 32768  
 SOLVENT CDCl3  
 NS 256  
 DS 2  
 SWH 24038.461 Hz  
 FIDRES 0.733596 Hz  
 AQ 0.6815744 sec  
 RG 186.42  
 DW 20.800 usec  
 DE 6.50 usec  
 TE 299.8 K  
 D1 2.00000000 sec  
 D11 0.03000000 sec  
 TD0 1

===== CHANNEL f1 =====  
 SFO1 100.6278588 MHz  
 NUC1 13C  
 P1 8.90 usec  
 PLW1 54.00000000 W

===== CHANNEL f2 =====  
 SFO2 400.1516006 MHz  
 NUC2 1H  
 CPDPRG[2] waltz16  
 PCPD2 90.00 usec  
 PLW2 12.00000000 W  
 PLW12 0.32231000 W  
 PLW13 0.16212000 W

F2 - Processing parameters  
 SI 16384  
 SF 100.6177864 MHz  
 WDW EM  
 SSB 0  
 LB 1.00 Hz  
 GB 0  
 PC 2.00

1H of VBSSM 423/82

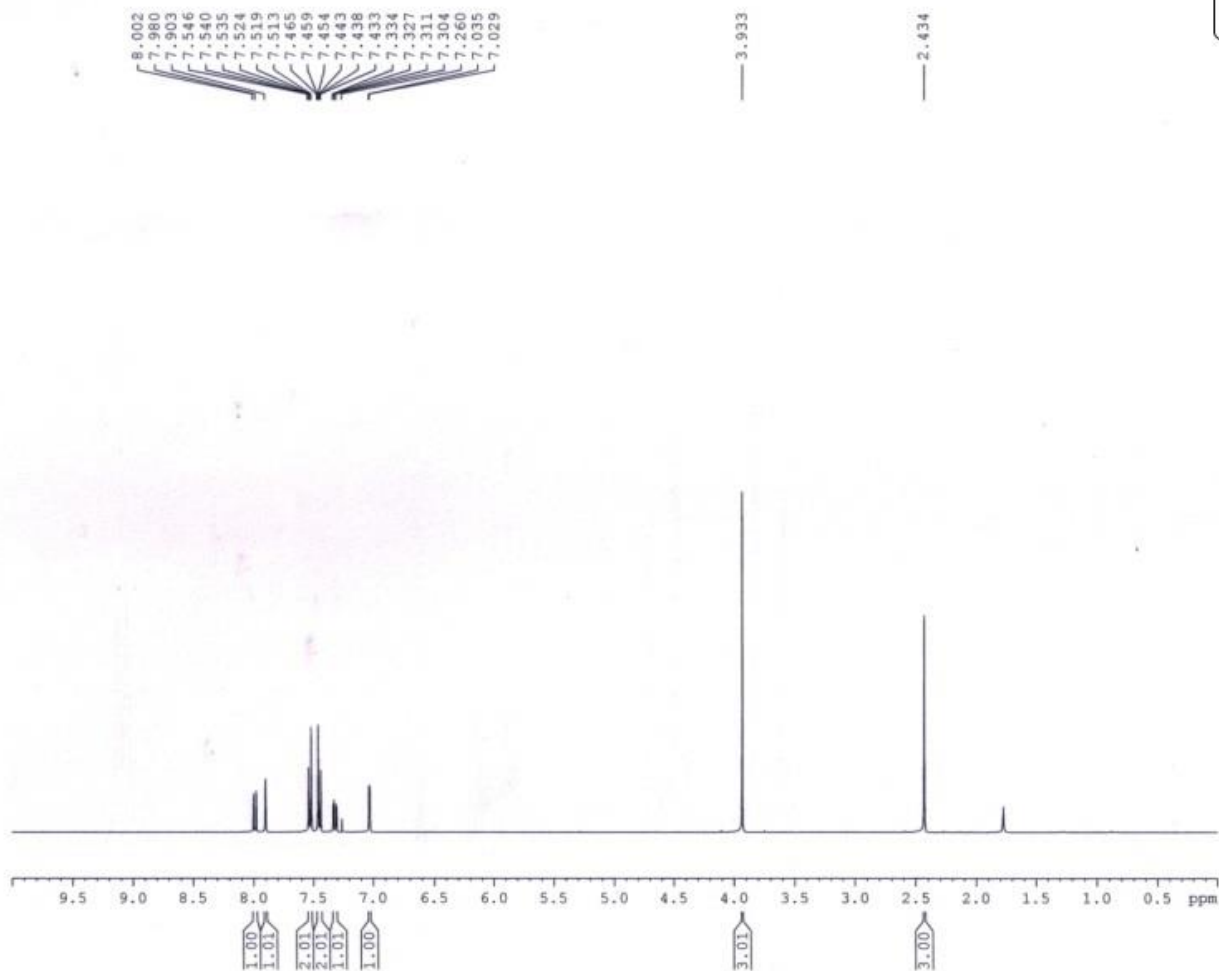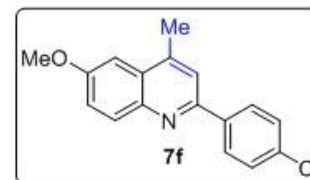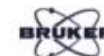

Current Data Parameters  
NAME Dr. A MAJEE 2019  
EXPNO 380  
PROCNO 1

F2 - Acquisition Parameters  
Date\_ 20190719  
Time 12.10  
INSTRUM spect  
PROBHD 5 mm PABBO BB/  
PULPROG zg30  
TD 32768  
SOLVENT CDCl3  
NS 16  
DS 1  
SWH 8223.685 Hz  
FIDRES 0.250967 Hz  
AQ 1.9922944 sec  
RG 93.46  
DW 60.800 usec  
DE 6.50 usec  
TE 301.2 K  
D1 1.00000000 sec  
TDO 1

----- CHANNEL f1 -----  
SF01 400.1524711 MHz  
NUC1 1H  
P1 14.75 usec  
PLW1 12.00000000 W

F2 - Processing parameters  
SI 16384  
SF 400.1500091 MHz  
WDW EM  
SSB 0  
LB 0.30 Hz  
GB 0  
PC 1.00

13C of VBSSM 423/82

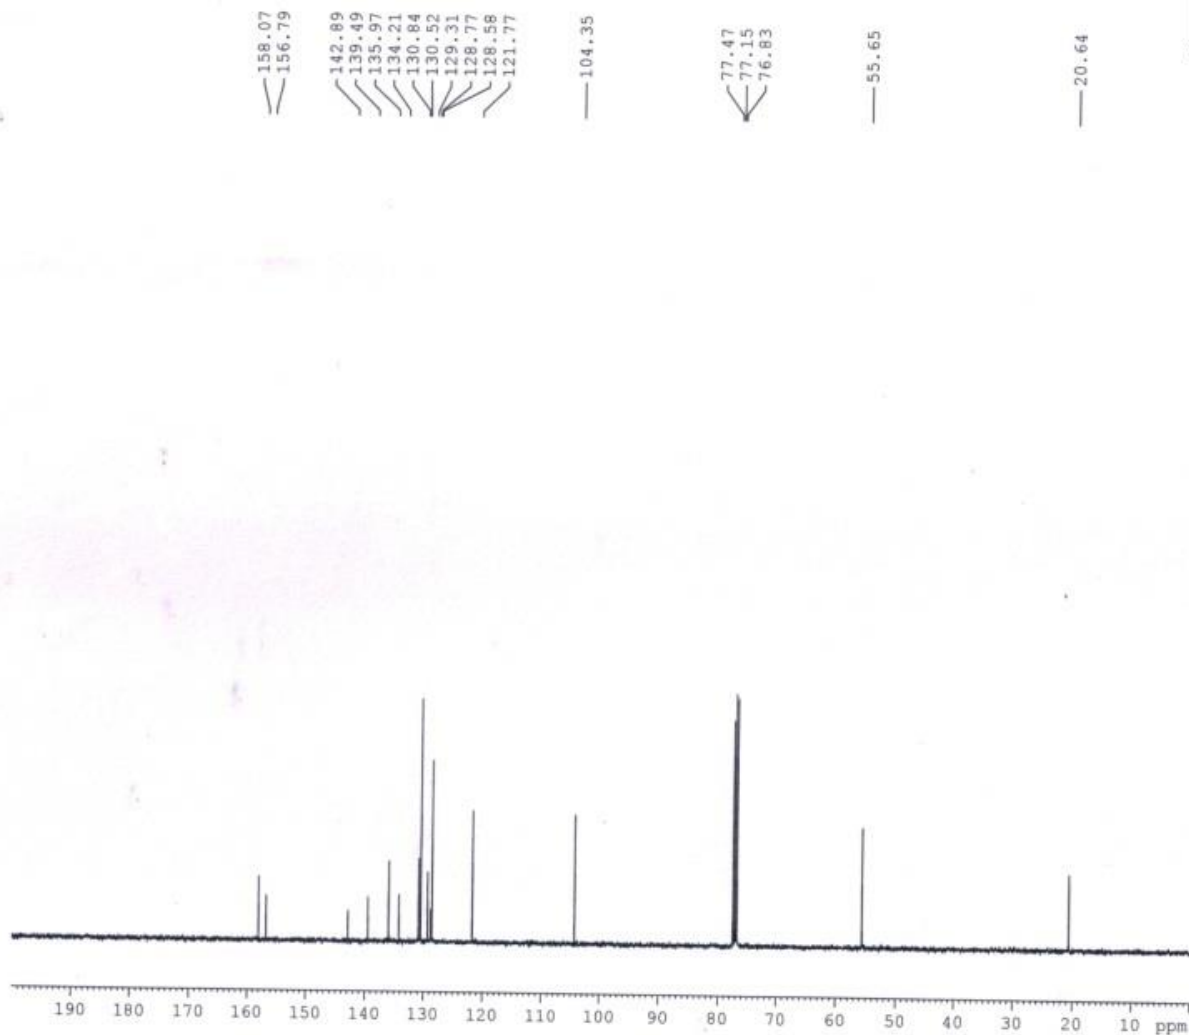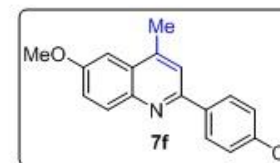

BRUKER

Current Data Parameters  
NAME Dr. A MAJEE 2019  
EXPNO 383  
PROCNO 1

F2 - Acquisition Parameters  
Date\_ 20190719  
Time 12.48  
INSTRUM spect  
PROBHD 5 mm PABBO BR/  
PULPROG zgpg30  
TD 32768  
SOLVENT CDCl3  
NS 280  
DS 2  
SWH 24038.461 Hz  
FIDRES 0.733596 Hz  
AQ 0.6815744 sec  
RG 93.46  
DW 20.800 usec  
DE 6.50 usec  
TE 301.6 K  
D1 2.00000000 sec  
D11 0.03000000 sec  
TDO 1

----- CHANNEL f1 -----  
SFO1 100.6278588 MHz  
NUC1 13C  
P1 8.90 usec  
PLW1 54.00000000 W

----- CHANNEL f2 -----  
SFO2 400.1516006 MHz  
NUC2 1H  
CPDPRG2 waltz16  
PCPD2 90.00 usec  
PLW2 12.00000000 W  
PLW12 0.32231000 W  
PLW13 0.16212000 W

F2 - Processing parameters  
SI 16384  
SF 100.6177857 MHz  
WDW EM  
SSB 0  
LB 1.00 Hz  
GB 0  
PC 2.00

1H of VBSSM 423/89

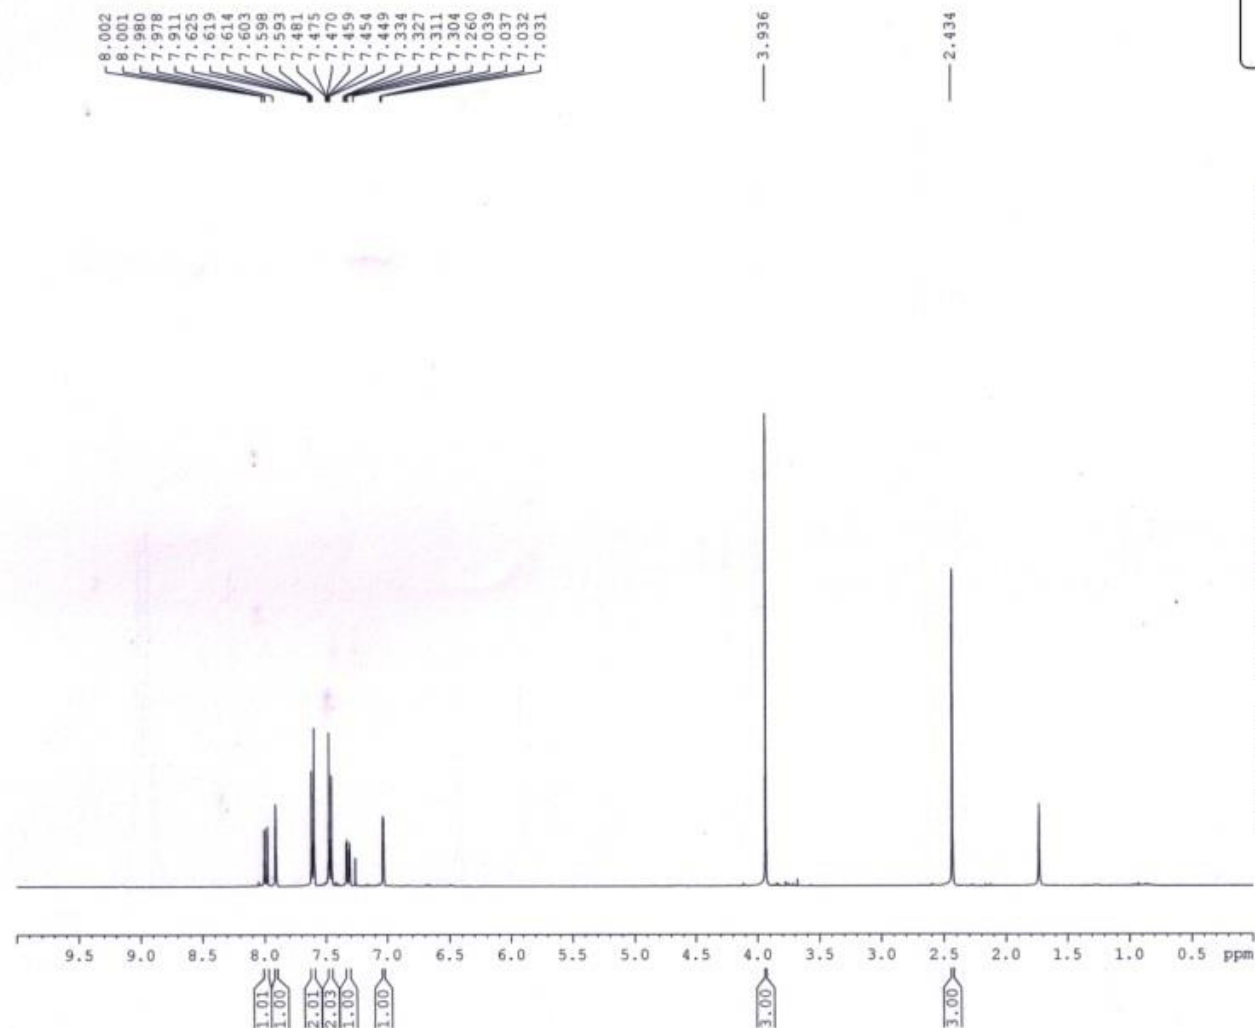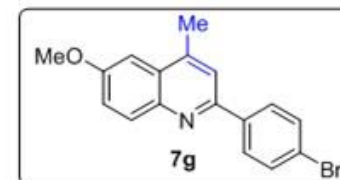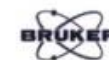

Current Data Parameters  
NAME Dr. A MAJEE 2019  
EXPNO 402  
PROCNO 1

F2 - Acquisition Parameters  
Date\_ 20190728  
Time 12.46  
INSTRUM spect  
PROBHD 5 mm PABBO BB/  
PULPROG zg30  
TD 32768  
SOLVENT CDCl3  
NS 16  
DS 1  
SWH 8223.685 Hz  
FIDRES 0.250967 Hz  
AQ 1.9922944 sec  
RG 148.91  
DW 60.800 usec  
DE 6.50 usec  
TE 294.3 K  
D1 1.00000000 sec  
TDO 1

----- CHANNEL f1 -----  
SFO1 400.1524711 MHz  
NUC1 1H  
P1 14.75 usec  
PLW1 12.00000000 W

F2 - Processing parameters  
SI 16384  
SF 400.1500093 MHz  
WDW EM  
SSB 0  
LB 0 0.30 Hz  
GB 0  
PC 1.00

13C of VBSSM 423/89

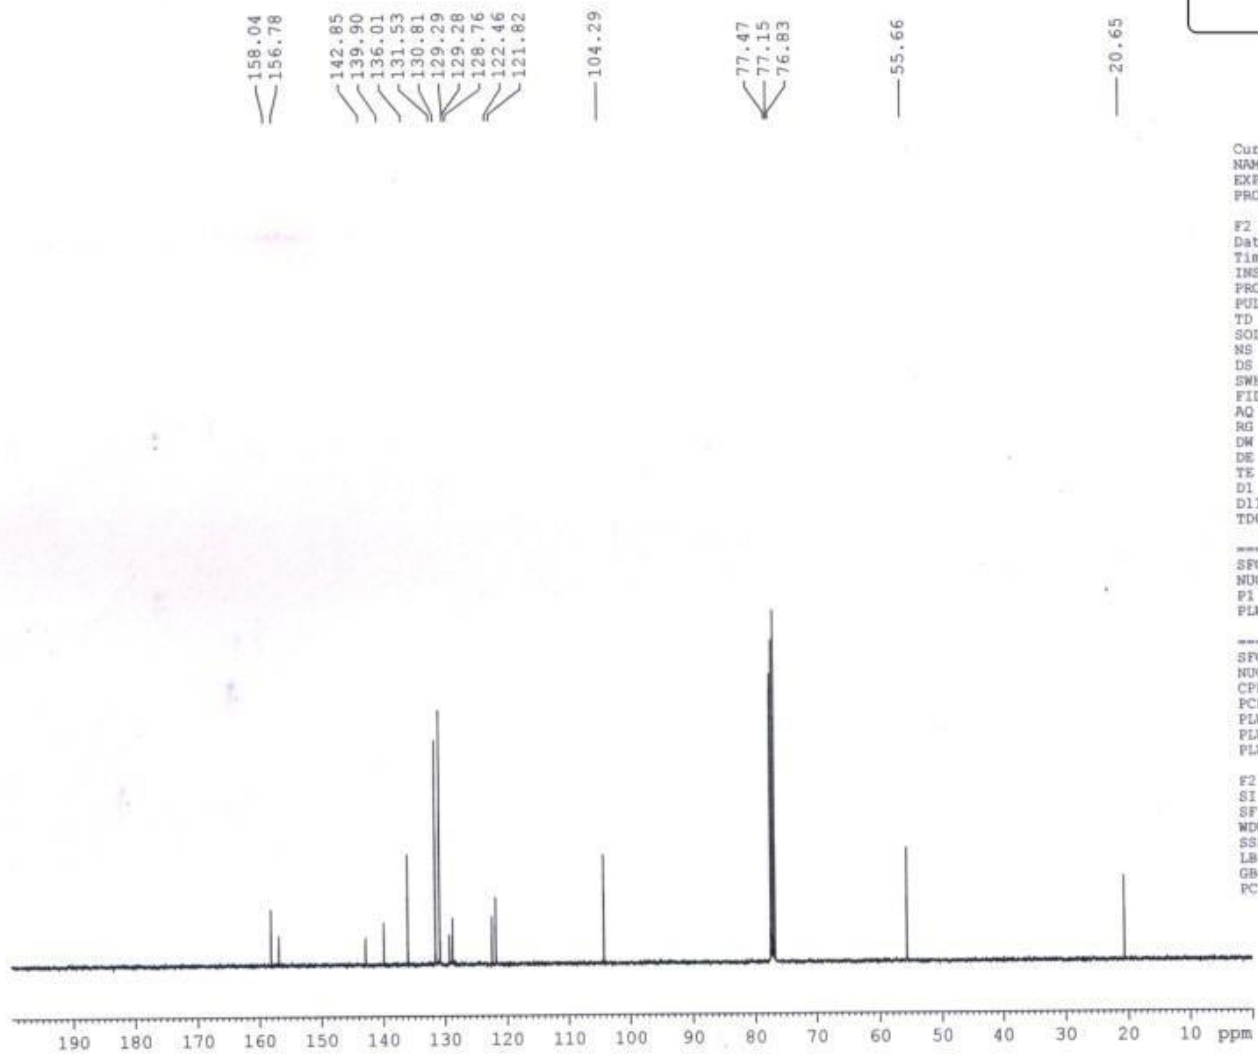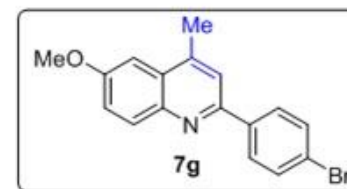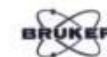

Current Data Parameters  
NAME Dr. A MAJEE 2019  
EXPNO 403  
PROCNO 1

F2 - Acquisition Parameters  
Date\_ 20190728  
Time 13.17  
INSTRUM spect  
PROBHD 5 mm PABBO BB/  
PULPROG zgpg30  
TD 32768  
SOLVENT CDCl3  
NS 640  
DS 2  
SWH 24038.461 Hz  
FIDRES 0.733596 Hz  
AQ 0.6815744 sec  
RG 148.91  
DW 20.800 usec  
DE 6.50 usec  
TE 295.4 K  
D1 2.00000000 sec  
D11 0.03000000 sec  
TD0 1

----- CHANNEL f1 -----  
SFO1 100.6278588 MHz  
NUC1 13C  
P1 8.90 usec  
PLW1 54.00000000 W

----- CHANNEL f2 -----  
SFO2 400.1516006 MHz  
NUC2 1H  
CPDPRG12 waltz16  
PCPD2 90.00 usec  
PLW2 12.00000000 W  
PLW12 0.32231000 W  
PLW13 0.16212000 W

F2 - Processing parameters  
SI 16384  
SF 100.6177872 MHz  
WDW EM  
SSB 0  
LB 1.00 Hz  
GB 0  
PC 2.00

1H of VBSSM 423/84

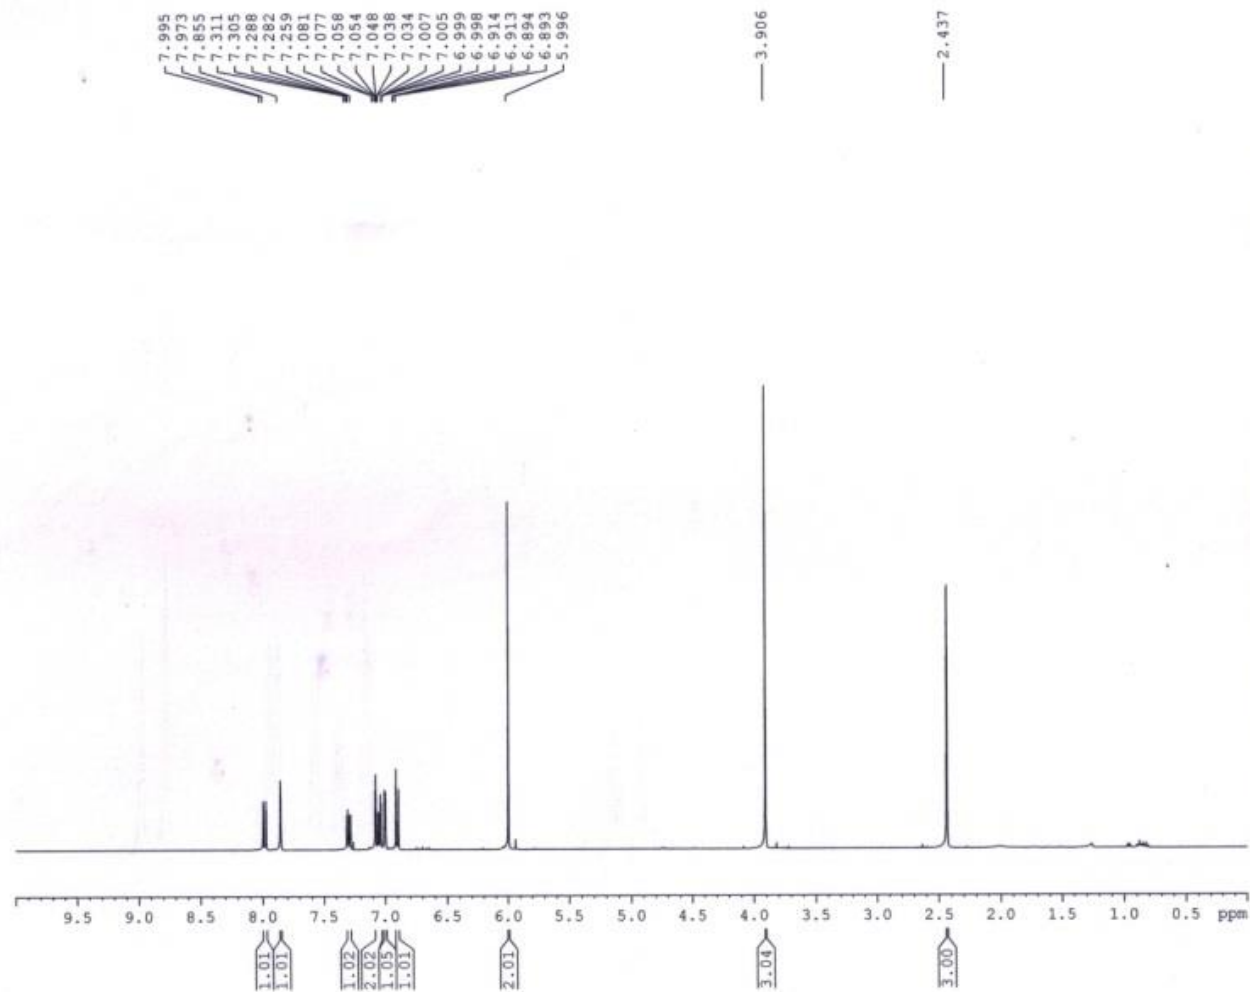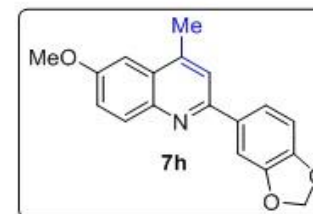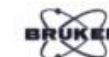

Current Data Parameters  
NAME Dr. A MAJEE 2019  
EXPNO 384  
PROCNO 1

F2 - Acquisition Parameters  
Date\_ 20190720  
Time 10.20  
INSTRUM spect  
PROBHD 5 mm PABBO BB/  
PULPROG zg30  
TD 32768  
SOLVENT CDCl3  
NS 32  
DS 1  
SWH 8223.685 Hz  
FIDRES 0.250967 Hz  
AQ 1.9922944 sec  
RG 54.07  
DW 60.800 usec  
DE 6.50 usec  
TE 303.5 K  
D1 1.00000000 sec  
TD0 1

----- CHANNEL f1 -----  
SFO1 400.1524711 MHz  
NUC1 1H  
P1 14.75 usec  
PLW1 12.00000000 W

F2 - Processing parameters  
SI 16384  
SF 400.1500092 MHz  
WDW EM  
SSB 0  
LB 0.30 Hz  
GB 0  
PC 1.00

13C of VBSSM 423/84

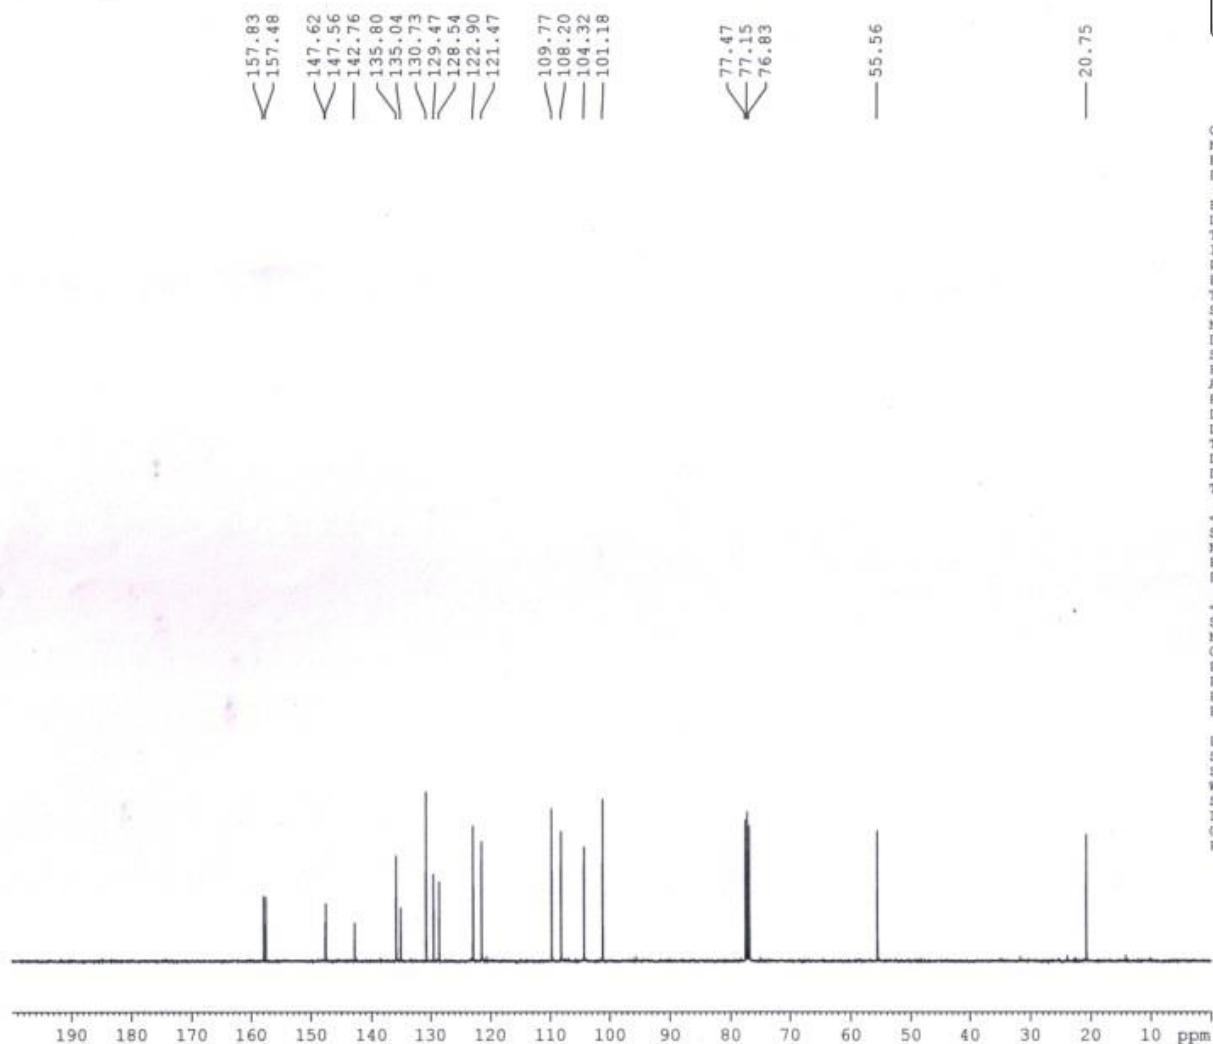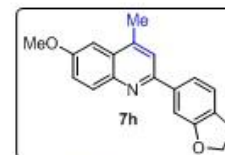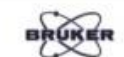

Current Data Parameters  
NAME Dr. A MAJEE 2019  
EXPNO 385  
PROCNO 1

F2 - Acquisition Parameters  
Date\_ 20190720  
Time 10.37  
INSTRUM spect  
PROBHD 5 mm PABBO BB/  
PULPROG zgpg30  
TD 32768  
SOLVENT CDCl3  
NS 344  
DS 2  
SWH 24038.461 Hz  
FIDRES 0.733596 Hz  
AQ 0.6815744 sec  
RG 54.07  
DW 20.800 usec  
DE 6.50 usec  
TE 303.8 K  
D1 2.00000000 sec  
D11 0.03000000 sec  
TDO 1

----- CHANNEL f1 -----  
SFO1 100.6278588 MHz  
NUC1 13C  
P1 8.90 usec  
PLW1 54.00000000 W

----- CHANNEL f2 -----  
SFO2 400.1516006 MHz  
NUC2 1H  
CPDPRG2 waltz16  
PCPD2 90.00 usec  
PLW2 12.00000000 W  
PLW12 0.32231000 W  
PLW13 0.16212000 W

F2 - Processing parameters  
SI 16384  
SF 100.6177902 MHz  
WDW EM  
SSB 0  
LB 1.00 Hz  
GB 0  
PC 2.00



1H of VBSSM 423/85

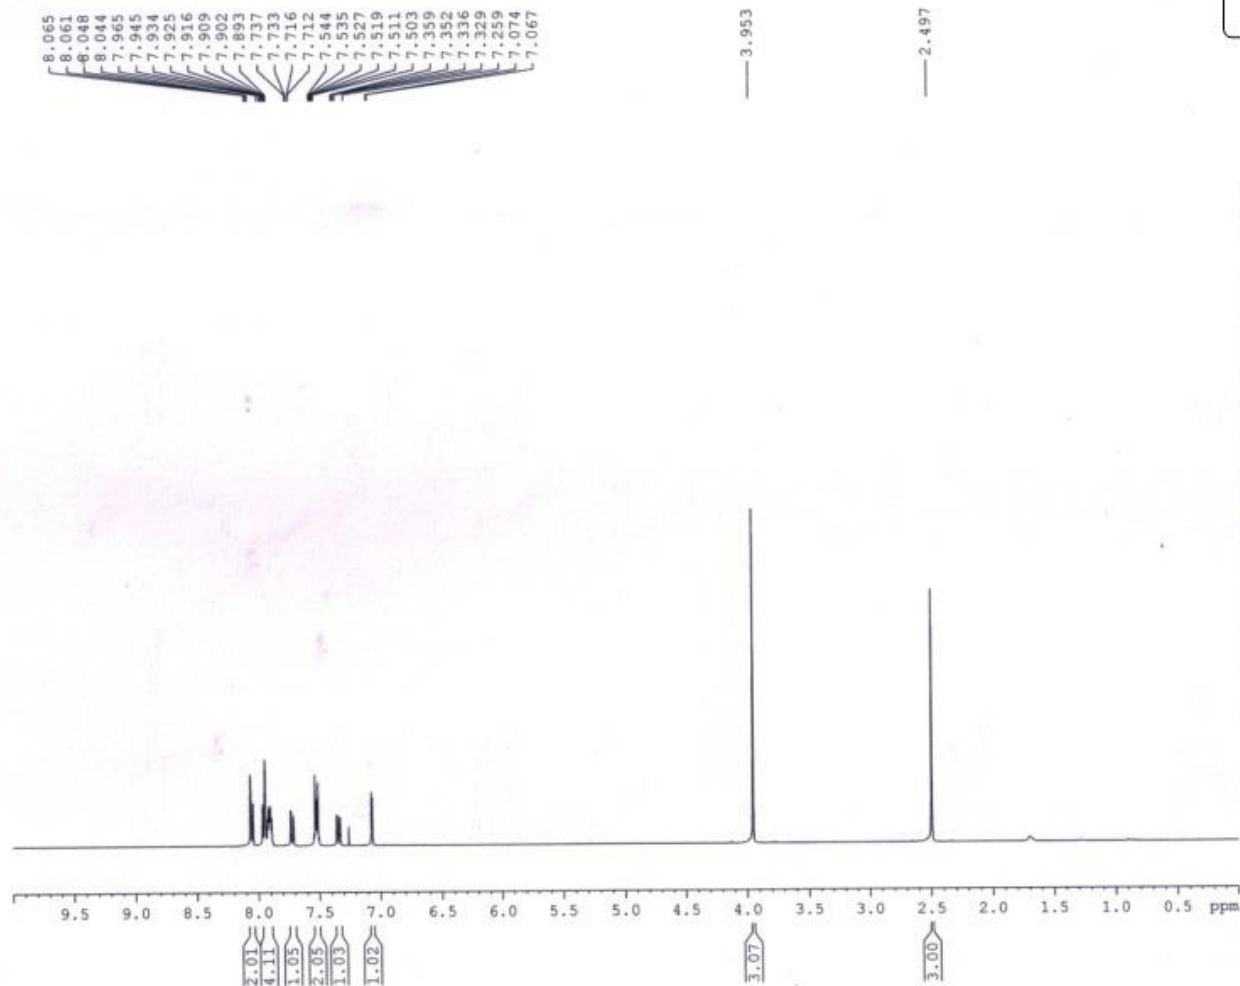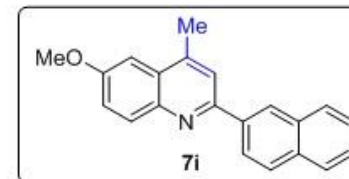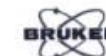

Current Data Parameters  
NAME Dr. A MAJEE 2019  
EXPNO 391  
PROCNO 1

F2 - Acquisition Parameters  
Date\_ 20190721  
Time 10.28  
INSTRUM spect  
PROBHD 5 mm PABBO BB/  
PULPROG zg30  
TD 32768  
SOLVENT CDC13  
NS 24  
DS 1  
SWH 8223.685 Hz  
FIDRES 0.250967 Hz  
AQ 1.9922944 sec  
RG 87.66  
DW 60.800 usec  
DE 6.50 usec  
TE 304.2 K  
D1 1.00000000 sec  
TD0 1

----- CHANNEL f1 -----  
SFO1 400.1524711 MHz  
NUC1 1H  
P1 14.75 usec  
PLW1 12.00000000 W

F2 - Processing parameters  
SI 16384  
SF 400.1500092 MHz  
WDW EM  
SSB 0  
LB 0.30 Hz  
GB 0  
PC 1.00

13C of VBSSM 423/85

158.08  
158.01  
143.02  
136.60  
135.83  
133.41  
133.13  
130.96  
129.77  
128.74  
128.51  
128.33  
128.00  
127.84  
127.02  
126.37  
126.31  
121.61  
103.46

77.47  
77.15  
76.84

55.67

20.79

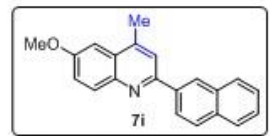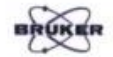

Current Data Parameters  
NAME Dr. A MAJEE 2019  
EXPNO 392  
PROCNO 1

F2 - Acquisition Parameters  
Date\_ 20190721  
Time 10.42  
INSTRUM spect  
PROBRD 5 mm PABBO BB/  
PULPROG zgpg30  
TD 32768  
SOLVENT CDCl3  
NS 256  
DS 2  
SMH 24038.461 Hz  
FIDRES 0.733596 Hz  
AQ 0.6815744 sec  
RG 87.66  
DW 20.800 usec  
DE 6.50 usec  
TE 304.5 K  
D1 2.0000000 sec  
D11 0.0300000 sec  
TDO 1

----- CHANNEL f1 -----  
SFO1 100.6278588 MHz  
NUC1 13C  
P1 8.90 usec  
PLW1 54.0000000 W

----- CHANNEL f2 -----  
SFO2 400.1516006 MHz  
NUC2 1H  
CPDPRG2 waltz16  
PCPD2 90.00 usec  
PLW2 12.0000000 W  
PLW12 0.32231000 W  
PLW13 0.16212000 W

F2 - Processing parameters  
SI 16384  
SF 100.6177843 MHz  
WDW EM  
SSB 0  
LB 1.00 Hz  
GB 0  
PC 2.00

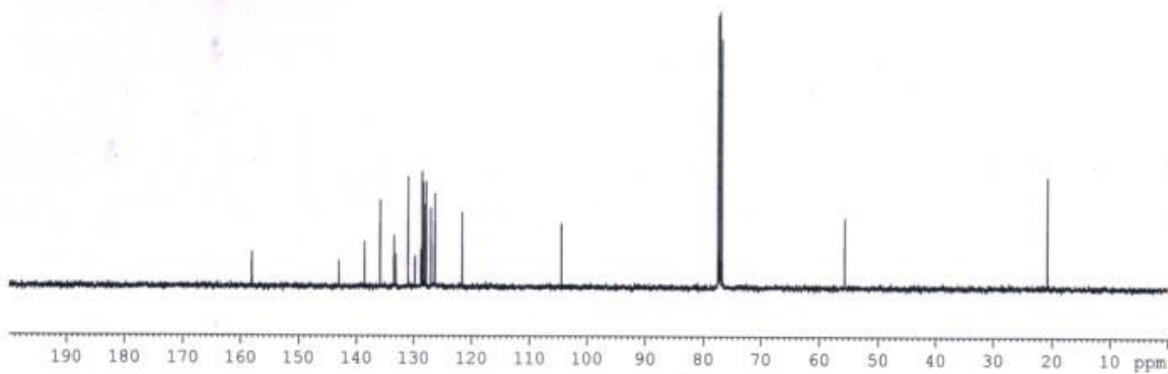

1H of VBSSM 423/81

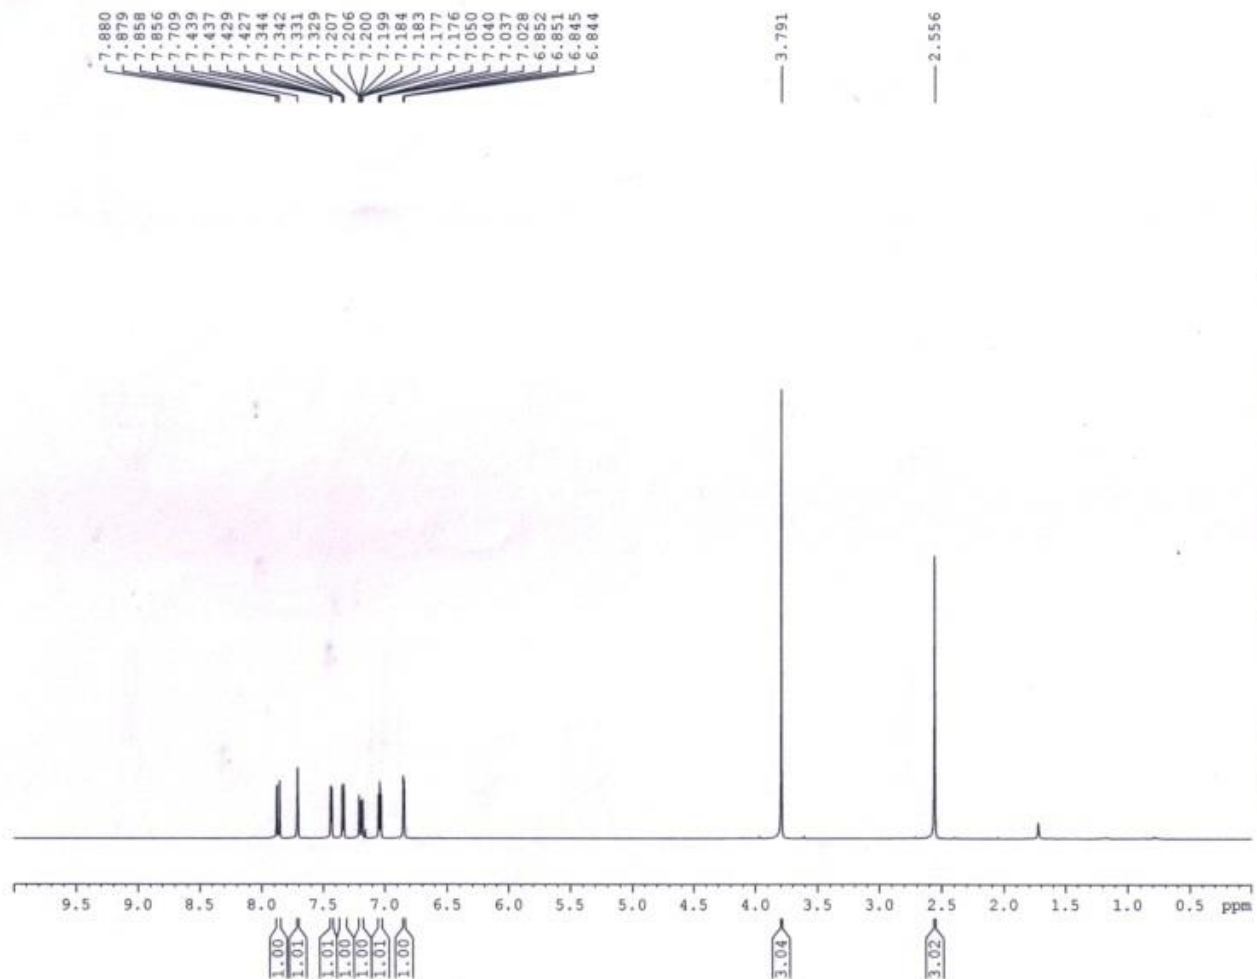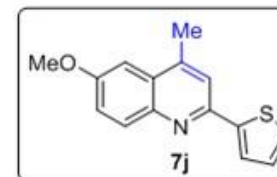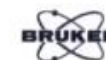

Current Data Parameters  
NAME Dr. A MAJEE 2019  
EXPNO 377  
PROCNO 1

F2 - Acquisition Parameters  
Date\_ 20190718  
Time 11.14  
INSTRUM spect  
PROBHD 5 mm PABBO BB/  
PULPROG zg30  
TD 32768  
SOLVENT CDCl3  
NS 32  
DS 1  
SWH 8223.685 Hz  
FIDRES 0.250967 Hz  
AQ 1.9922944 sec  
RG 62.69  
DW 60.800 usec  
DE 6.50 usec  
TE 299.4 K  
D1 1.00000000 sec  
TDO 1

----- CHANNEL f1 -----  
SFO1 400.1524711 MHz  
NUC1 1H  
P1 14.75 usec  
PLW1 12.00000000 W

F2 - Processing parameters  
SI 16384  
SF 400.1500511 MHz  
WDW EM  
SSB 0  
LB 0.30 Hz  
GB 0  
PC 1.00

13C of VBSSM 423/81

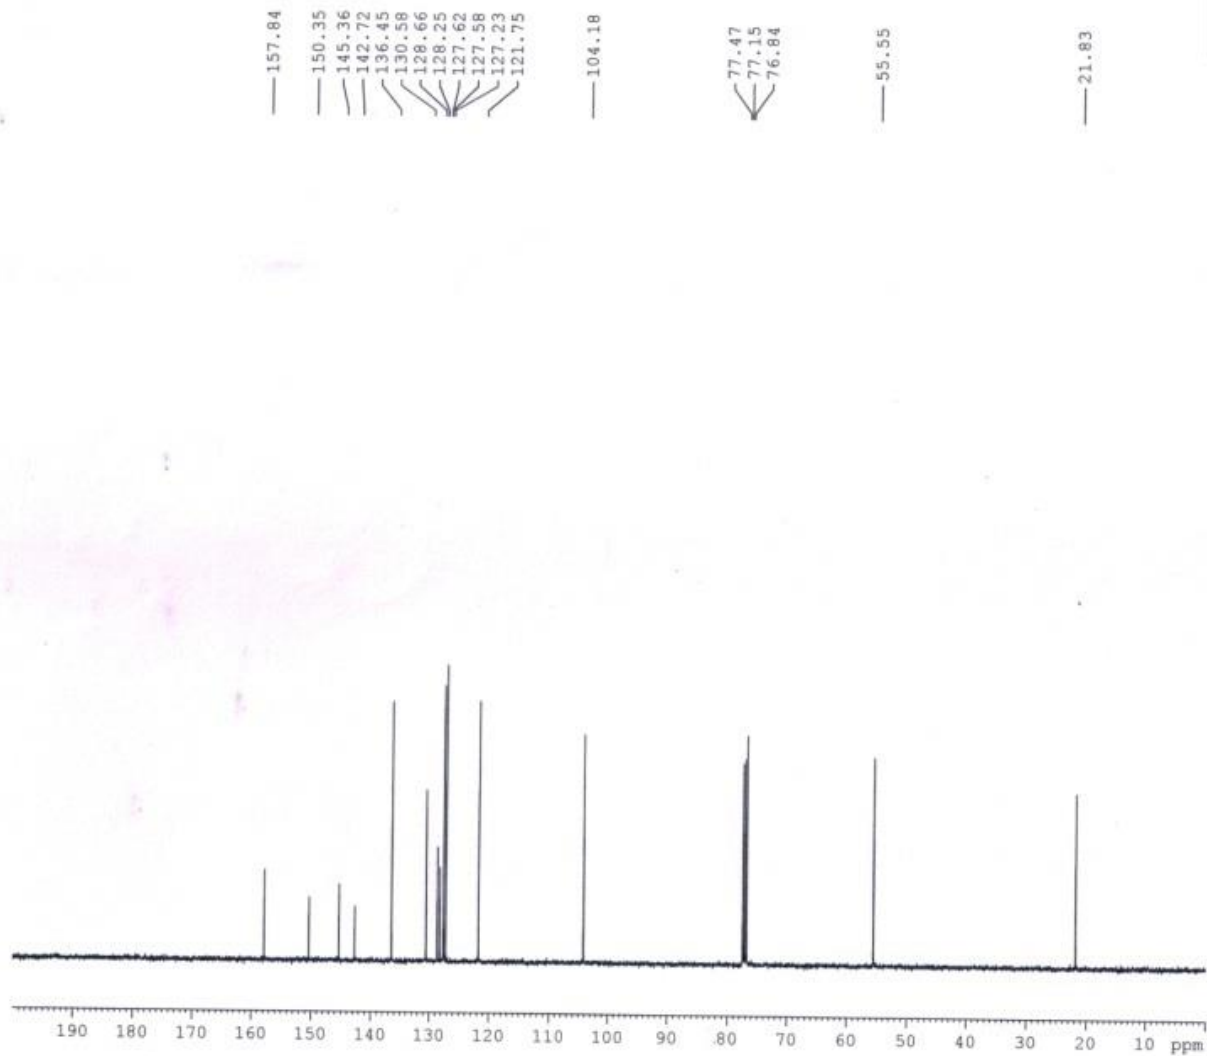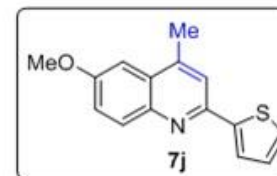

BRUKER

Current Data Parameters  
NAME Dr. A MAJEE 2019  
EXPNO 378  
PROCNO 1

F2 - Acquisition Parameters  
Date\_ 20190718  
Time 11.28  
INSTRUM spect  
PROBHD 5 mm PABBO BB/  
PULPROG zgpg30  
TD 32768  
SOLVENT CDCl3  
NS 240  
DS 2  
SWH 24038.461 Hz  
FIDRES 0.733596 Hz  
AQ 0.6815744 sec  
RG 62.69  
DW 20.800 usec  
DE 6.50 usec  
TE 300.2 K  
D1 2.00000000 sec  
D11 0.03000000 sec  
TDO 1

----- CHANNEL f1 -----  
SFO1 100.6278588 MHz  
NUC1 13C  
P1 8.90 usec  
PLW1 54.00000000 W

----- CHANNEL f2 -----  
SFO2 400.1516006 MHz  
NUC2 1H  
CPDPRG12 waltz16  
PCPD2 90.00 usec  
PLW2 12.00000000 W  
PLW12 0.32231000 W  
PLW13 0.16212000 W

F2 - Processing parameters  
SI 16384  
SF 100.6177911 MHz  
WDW EM  
SSB 0  
LB 1.00 Hz  
GB 0  
PC 2.00

1H of VBSSM 423/90

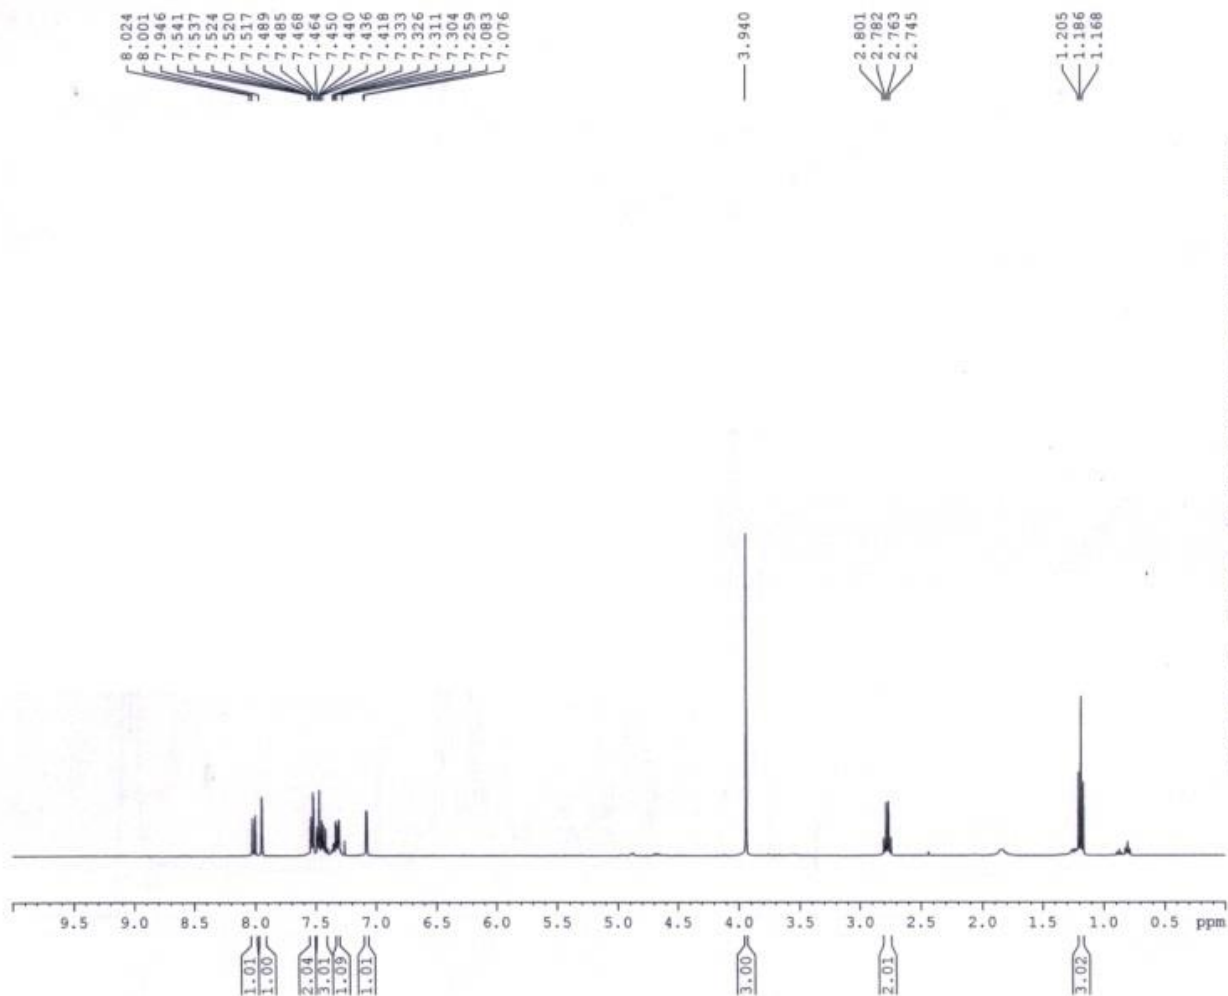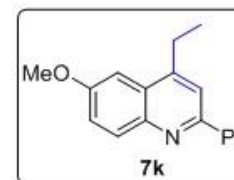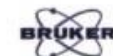

Current Data Parameters  
NAME Dr. A MAJEE 2019  
EXPNO 412  
PROCNO 1

F2 - Acquisition Parameters  
Date\_ 20190730  
Time 10.36  
INSTRUM spect  
PROBHD 5 mm PABBO BB/  
PULPROG zg30  
TD 32768  
SOLVENT CDCl3  
NS 16  
DS 1  
SWH 8223.685 Hz  
FIDRES 0.250967 Hz  
AQ 1.9922944 sec  
RG 67.81  
DW 60.800 usec  
DE 6.50 usec  
TE 298.0 K  
D1 1.00000000 sec  
TDO 1

----- CHANNEL f1 -----  
SFO1 400.1524711 MHz  
NUC1 1H  
P1 14.75 usec  
PLW1 12.00000000 W

F2 - Processing parameters  
SI 16384  
SF 400.1500092 MHz  
WDW EM  
SSB 0  
LB 0.30 Hz  
GB 0  
PC 1.00

13C of VBSSM 423/90

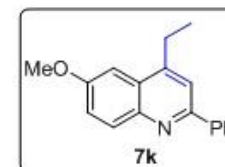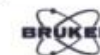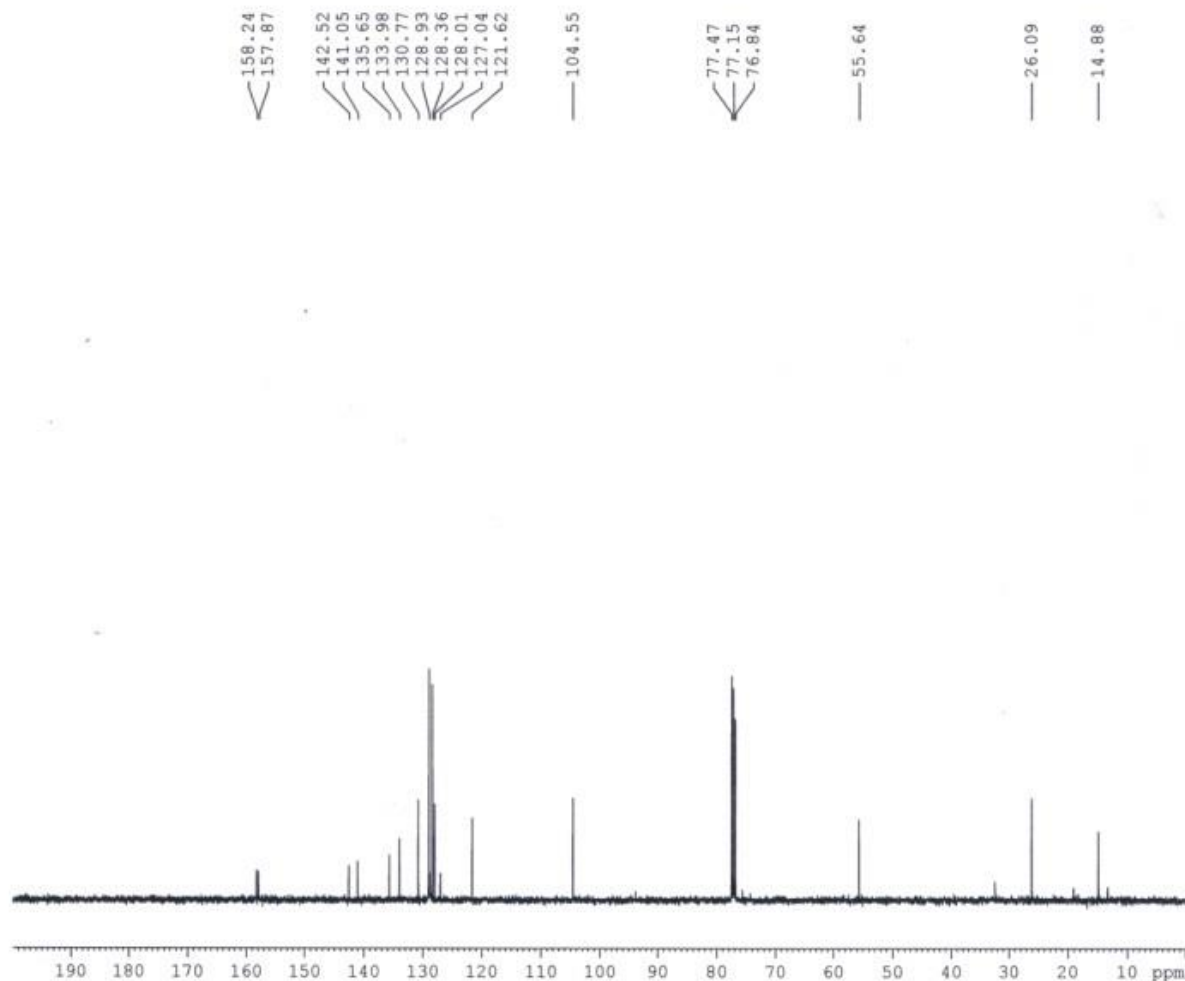

Current Data Parameters  
NAME Dr. A MAJEE 2019  
EXPNO 413  
PROCNO 1

F2 - Acquisition Parameters  
Date\_ 20190730  
Time 10.41  
INSTRUM spect  
PROBHD 5 mm F400 BB/  
PULPROG zgpg30  
TD 32768  
SOLVENT CDCl3  
NS 80  
DS 2  
SWH 24038.461 Hz  
FIDRES 0.733596 Hz  
AQ 0.6815744 sec  
RG 62.69  
DW 20.800 usec  
DE 6.50 usec  
TE 298.4 K  
D1 2.00000000 sec  
D11 0.03000000 sec  
TDO 1

----- CHANNEL f1 -----  
SFO1 100.6278588 MHz  
NUC1 13C  
P1 8.90 usec  
PLW1 54.00000000 W

----- CHANNEL f2 -----  
SFO2 400.1516006 MHz  
NUC2 1H  
CPCPRG[2] waltz16  
PCPD2 90.00 usec  
PLW2 12.00000000 W  
PLW12 0.32231000 W  
PLW13 0.16212000 W

F2 - Processing parameters  
SI 16384  
SF 100.6177875 MHz  
WDW EM  
SSB 0  
LB 1.00 Hz  
GB 0  
PC 2.00

<sup>1</sup>H of VBSSM 423/91

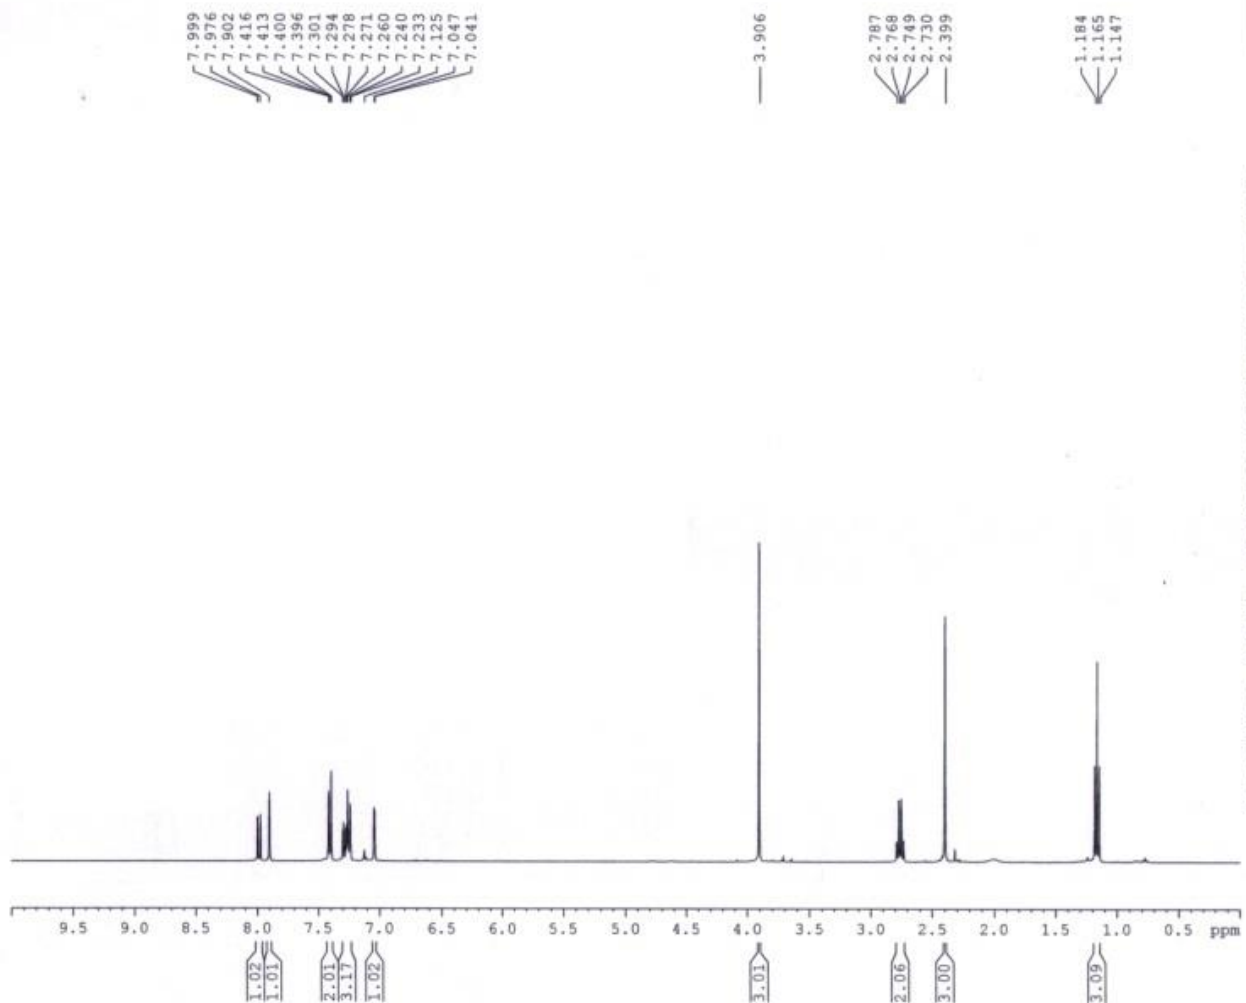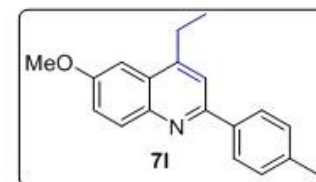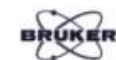

Current Data Parameters  
NAME Dr. A MAJEE 2019  
EXPNO 404  
PROCNO 1

F2 - Acquisition Parameters  
Date\_ 20190729  
Time 16.47  
INSTRUM spect  
PROBHD 5 mm PABBO BB/  
PULPROG zg30  
TD 32768  
SOLVENT CDCl3  
NS 16  
DS 1  
SWH 8223.685 Hz  
FIDRES 0.250967 Hz  
AQ 1.9922944 sec  
RG 54.07  
DW 60.800 usec  
DE 6.50 usec  
TE 297.7 K  
D1 1.00000000 sec  
TDO 1

----- CHANNEL f1 -----  
SFO1 400.1524711 MHz  
NUC1 1H  
P1 14.75 usec  
PLW1 12.00000000 W

F2 - Processing parameters  
SI 16384  
SF 400.1500198 MHz  
WDW EM  
SSB 0  
LB 0.30 Hz  
GB 0  
PC 1.00

13C of VBSSM 423/91

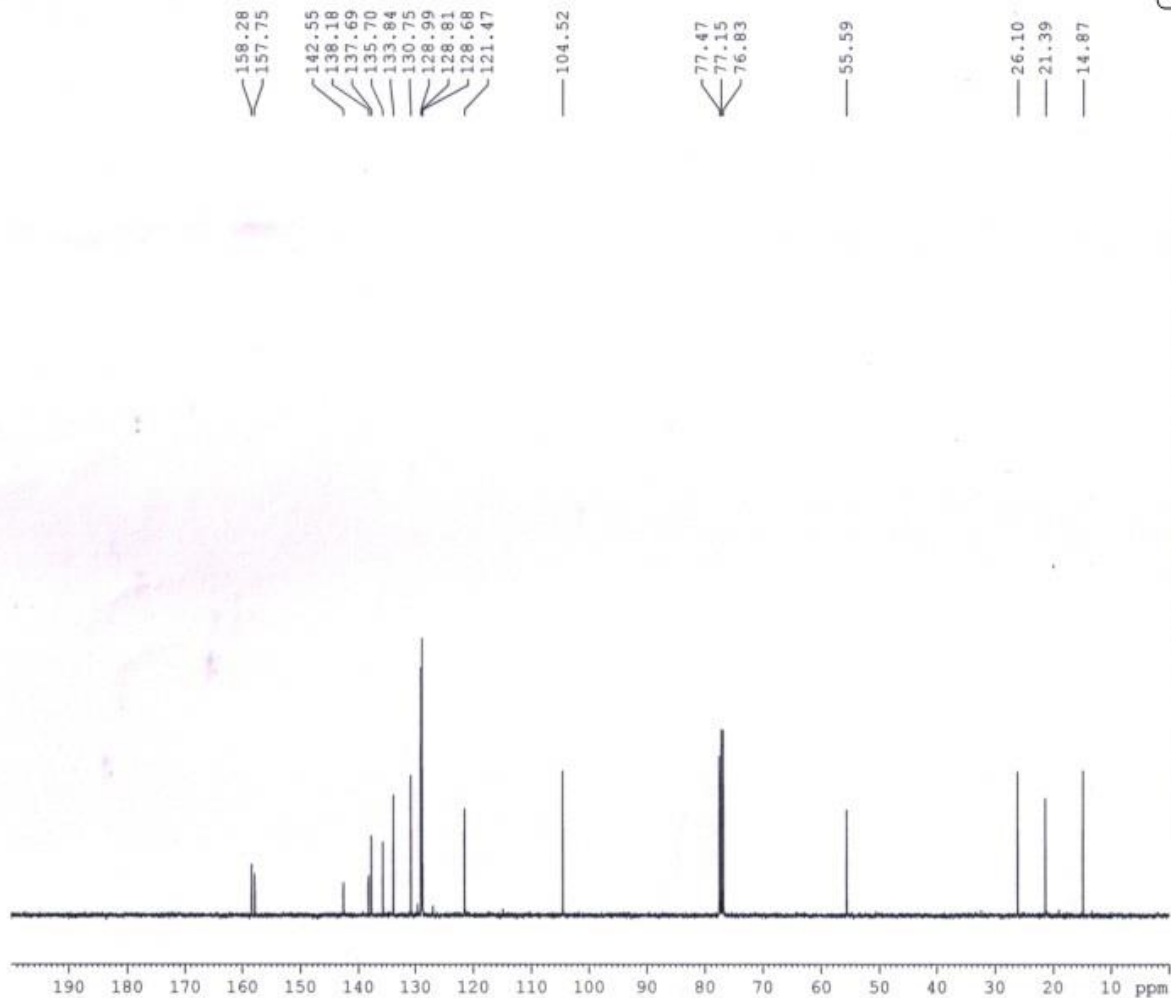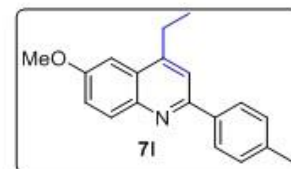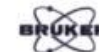

Current Data Parameters  
NAME Dr. A MAJEE 2019  
EXPCNO 405  
PROCNO 1

F2 - Acquisition Parameters  
Date\_ 20190729  
Time 16.57  
INSTRUM spect  
PROBHD 5 mm PABBO BB/  
PULPROG zgpg30  
TD 32768  
SOLVENT CDCl3  
NS 180  
DS 2  
SWH 24038.461 Hz  
FIDRES 0.733596 Hz  
AQ 0.6815744 sec  
RG 47.25  
DW 20.800 usec  
DE 6.50 usec  
TE 298.2 K  
D1 2.00000000 sec  
D11 0.03000000 sec  
TDO 1

----- CHANNEL f1 -----  
SFO1 100.6278588 MHz  
NUC1 13C  
P1 8.90 usec  
PLW1 54.00000000 W

----- CHANNEL f2 -----  
SFO2 400.1516006 MHz  
NUC2 1H  
CPDPRG2 waltz16  
PCPD2 90.00 usec  
PLW2 12.00000000 W  
PLW12 0.32231000 W  
PLW13 0.16212000 W

F2 - Processing parameters  
SI 16384  
SF 100.6177904 MHz  
WDW EM  
SSB 0  
LB 1.00 Hz  
GB 0  
PC 2.00



1H of VBSSM 423/92

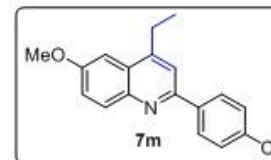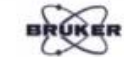

Current Data Parameters  
NAME Dr. A MAJEE 2019  
EXPNO 414  
PROCNO 1

F2 - Acquisition Parameters  
Date\_ 20190730  
Time 10.50  
INSTRUM spect  
PROBHD 5 mm PABBO BB/  
PULPROG zg30  
TD 32768  
SOLVENT CDCl3  
NS 24  
DS 1  
SWH 8223.685 Hz  
FIDRES 0.250967 Hz  
AQ 1.9922944 sec  
RG 148.91  
DW 60.800 usec  
DE 6.50 usec  
TE 298.0 K  
D1 1.00000000 sec  
TDO 1

----- CHANNEL f1 -----  
SF01 400.1524711 MHz  
NUC1 1H  
P1 14.75 usec  
PLW1 12.00000000 W

F2 - Processing parameters  
SI 16384  
SF 400.1500092 MHz  
WDW EM  
SSB 0  
LB 0.30 Hz  
GB 0  
PC 1.00

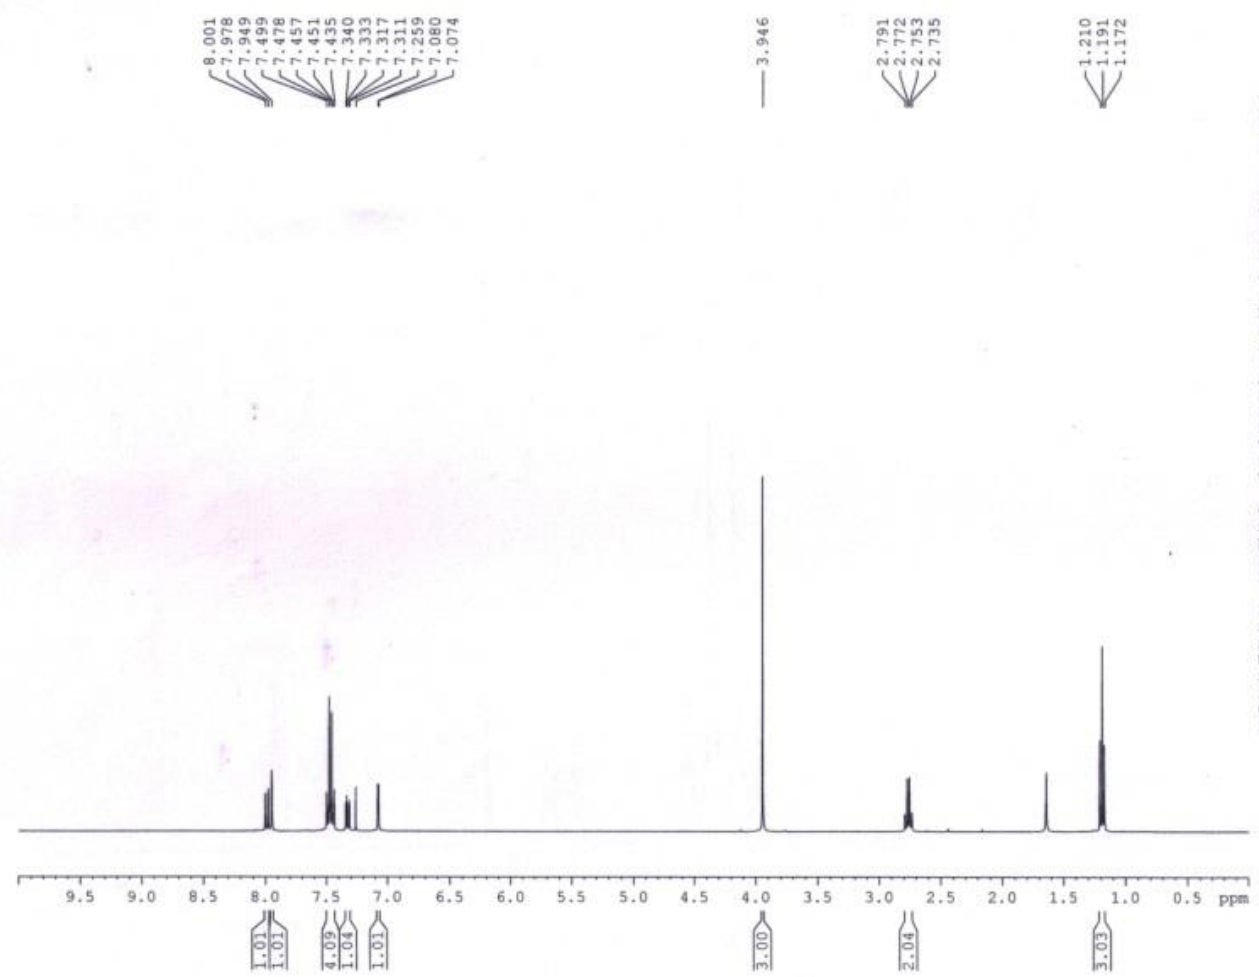

13C of VBSSM 423/92

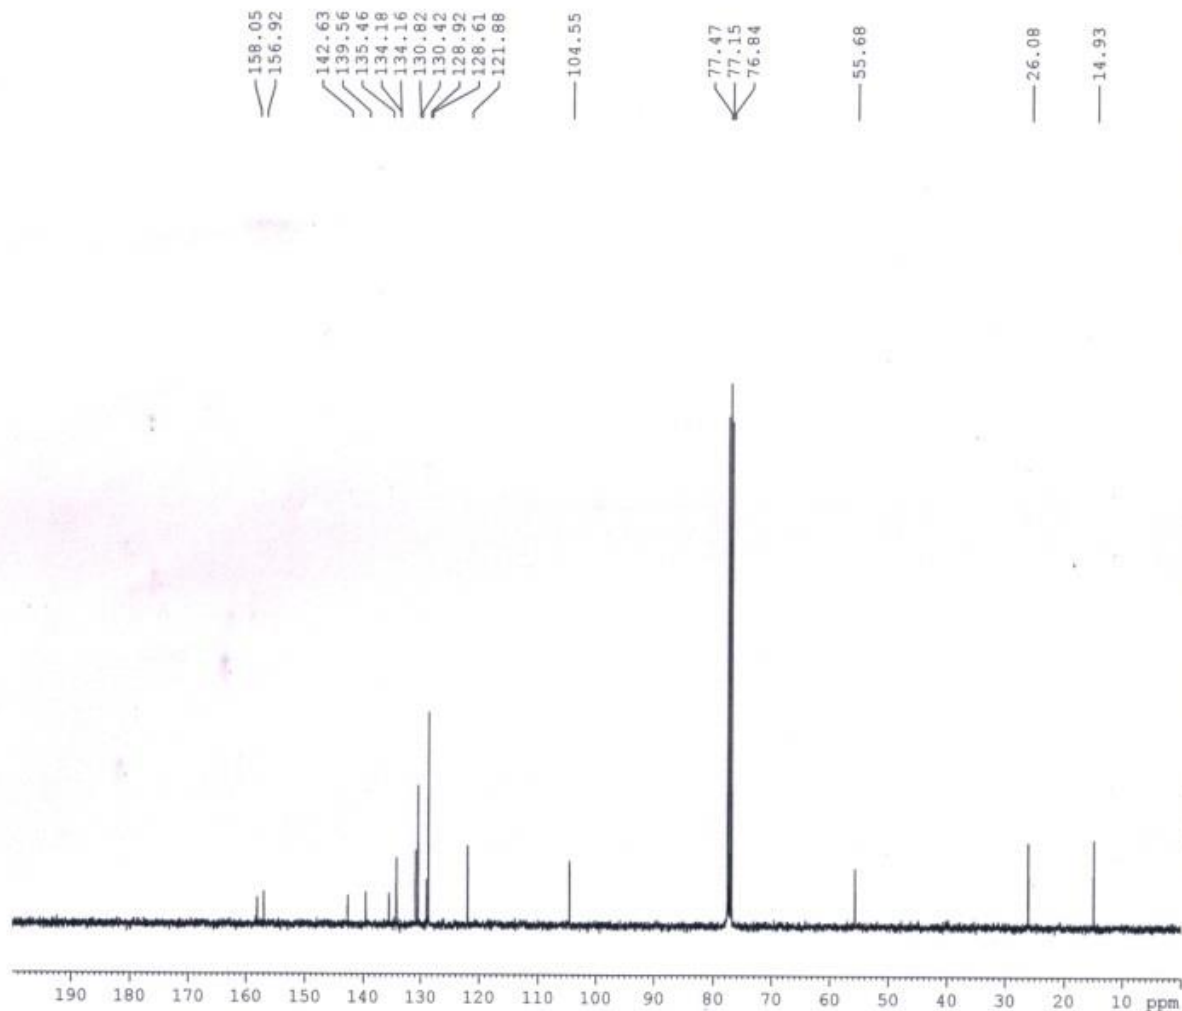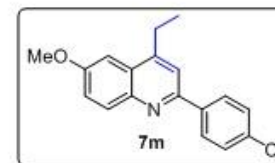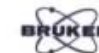

Current Data Parameters  
NAME Dr. A MAJEE 2019  
EXPNO 415  
PROCNO 1

F2 - Acquisition Parameters  
Date\_ 20190730  
Time 11.13  
INSTRUM spect  
PROBHD 5 mm PABBO BB/  
PULPROG zgpg30  
TD 32768  
SOLVENT CDCl3  
NS 480  
DS 2  
SWH 24038.461 Hz  
FIDRES 0.733596 Hz  
AQ 0.6815744 sec  
RG 148.91  
DW 20.800 usec  
DE 6.30 usec  
TE 298.9 K  
D1 2.00000000 sec  
D11 0.03000000 sec  
TDD 1

----- CHANNEL f1 -----  
SFO1 100.6278588 MHz  
NUC1 13C  
P1 8.90 usec  
PLW1 54.00000000 W

----- CHANNEL f2 -----  
SFO2 400.1516006 MHz  
NUC2 1H  
CPDPRG2 waltz16  
PCPD2 90.00 usec  
PLW2 12.00000000 W  
PLW12 0.32231000 W  
PLW13 0.16212000 W

F2 - Processing parameters  
SI 16384  
SF 100.6177841 MHz  
WDW EM  
SSB 0  
LB 1.00 Hz  
GB 0  
PC 2.00

1H of VBSSM 423/93

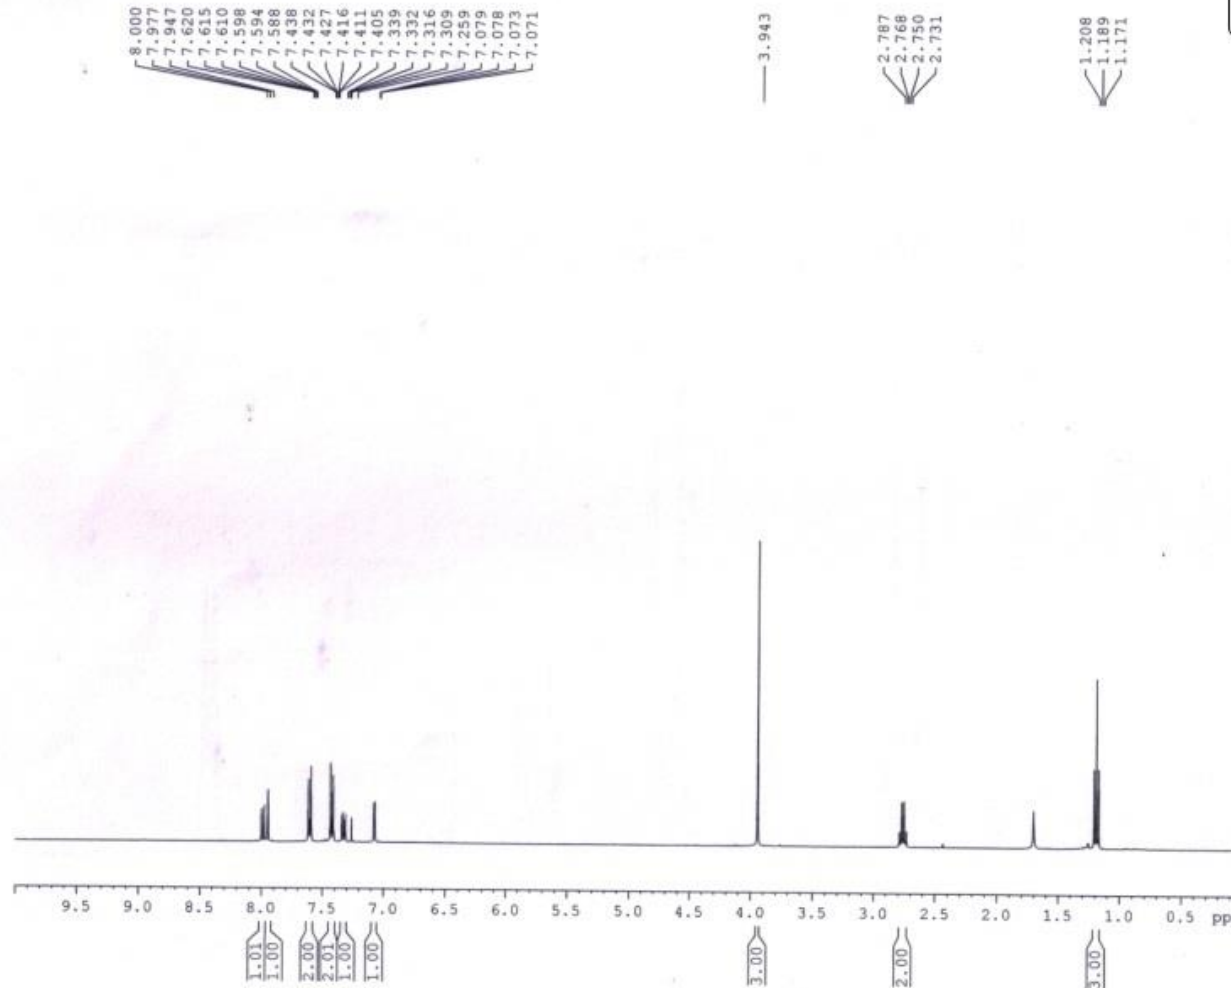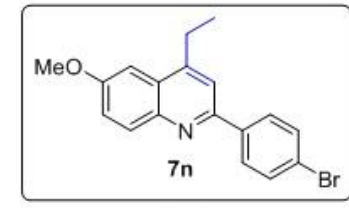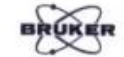

Current Data Parameters  
NAME Dr. A MAJEE 2019  
EXPNO 416  
PROCNO 1

F2 - Acquisition Parameters  
Date\_ 20190801  
Time 16.24  
INSTRUM spect  
PROBHD 5 mm PABBO BB/  
PULPROG zg30  
TD 32768  
SOLVENT CDCl3  
NS 16  
DS 1  
SWH 8223.685 Hz  
FIDRES 0.250967 Hz  
AQ 1.9922944 sec  
RG 120.16  
DW 60.800 usec  
DE 6.50 usec  
TE 298.3 K  
D1 -1.00000000 sec  
TD0 1

----- CHANNEL f1 -----  
SF01 400.1524711 MHz  
NUC1 1H  
P1 14.75 usec  
PLW1 12.00000000 W

F2 - Processing parameters  
SI 16384  
SF 400.1500092 MHz  
WDW EM  
SSB 0  
LB 0.30 Hz  
GB 0  
PC 1.00

13C of VBSSM 423/93

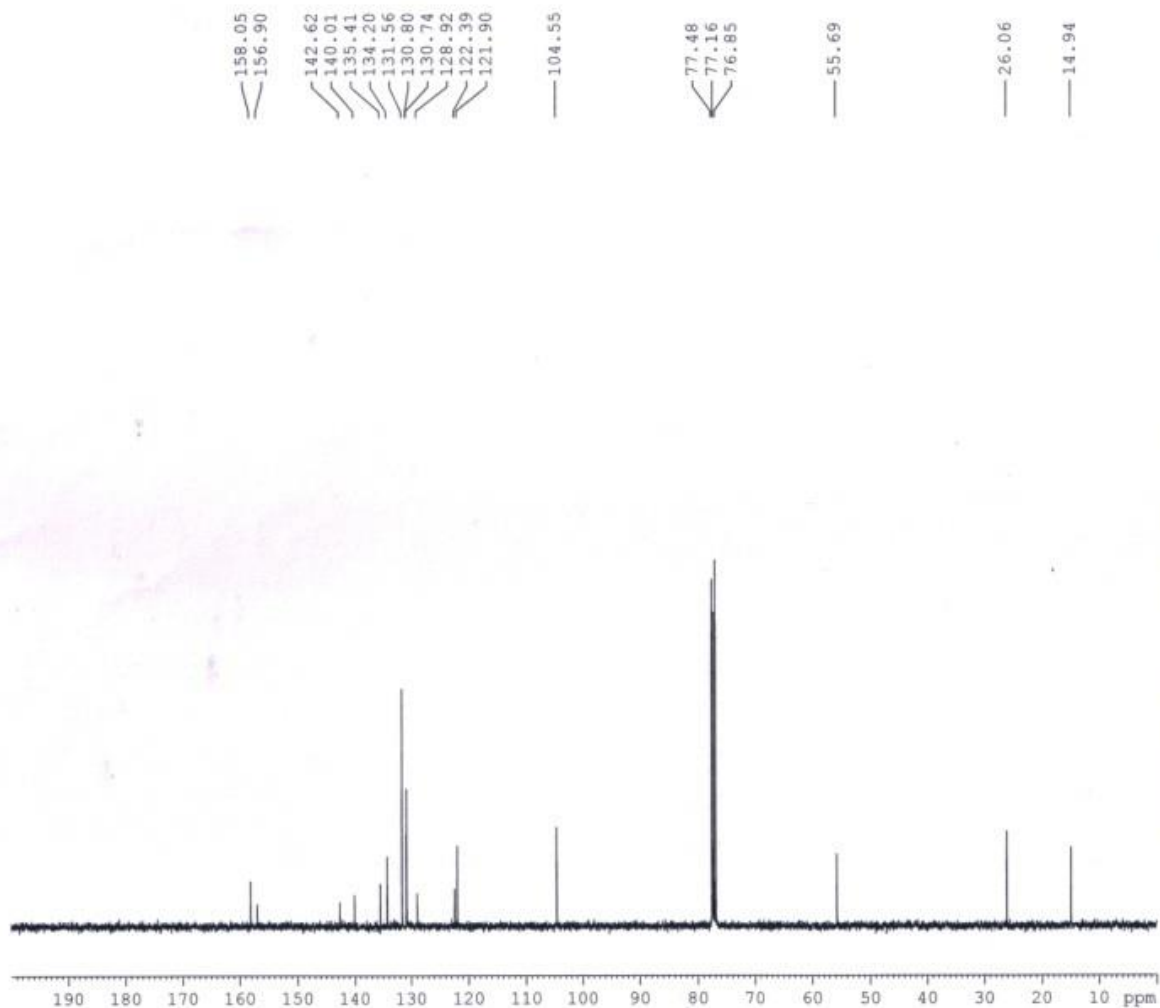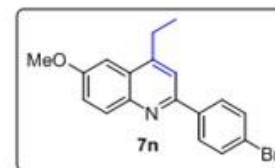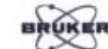

Current Data Parameters  
NAME Dr. A MAJEE 2019  
EXPNO 417  
PROCNO 1

F2 - Acquisition Parameters  
Date\_ 20190801  
Time 16.36  
INSTRUM spect  
PROBHD 5 mm PABBO BB/  
PULPROG zgpg30  
TD 32768  
SOLVENT CDCl3  
NS 220  
DS 2  
SWH 24038.461 Hz  
FIDRES 0.733596 Hz  
AQ 0.6815744 sec  
RG 120.16  
DW 20.800 usec  
DE 6.50 usec  
TE 298.8 K  
D1 2.00000000 sec  
D11 0.03000000 sec  
TDO 1

----- CHANNEL f1 -----  
SFO1 100.6278588 MHz  
NUC1 13C  
P1 8.90 usec  
PLW1 54.00000000 W

----- CHANNEL f2 -----  
SFO2 400.1516006 MHz  
NUC2 1H  
CPDPRG2 waltz16  
PCPD2 90.00 usec  
PLW2 12.00000000 W  
PLW12 0.32231000 W  
PLW13 0.16212000 W

F2 - Processing parameters  
SI 16384  
SF 100.6177842 MHz  
WDW EM  
SSB 0  
LB 1.00 Hz  
GB 0  
PC 2.00

1H of VBSSM 423/94

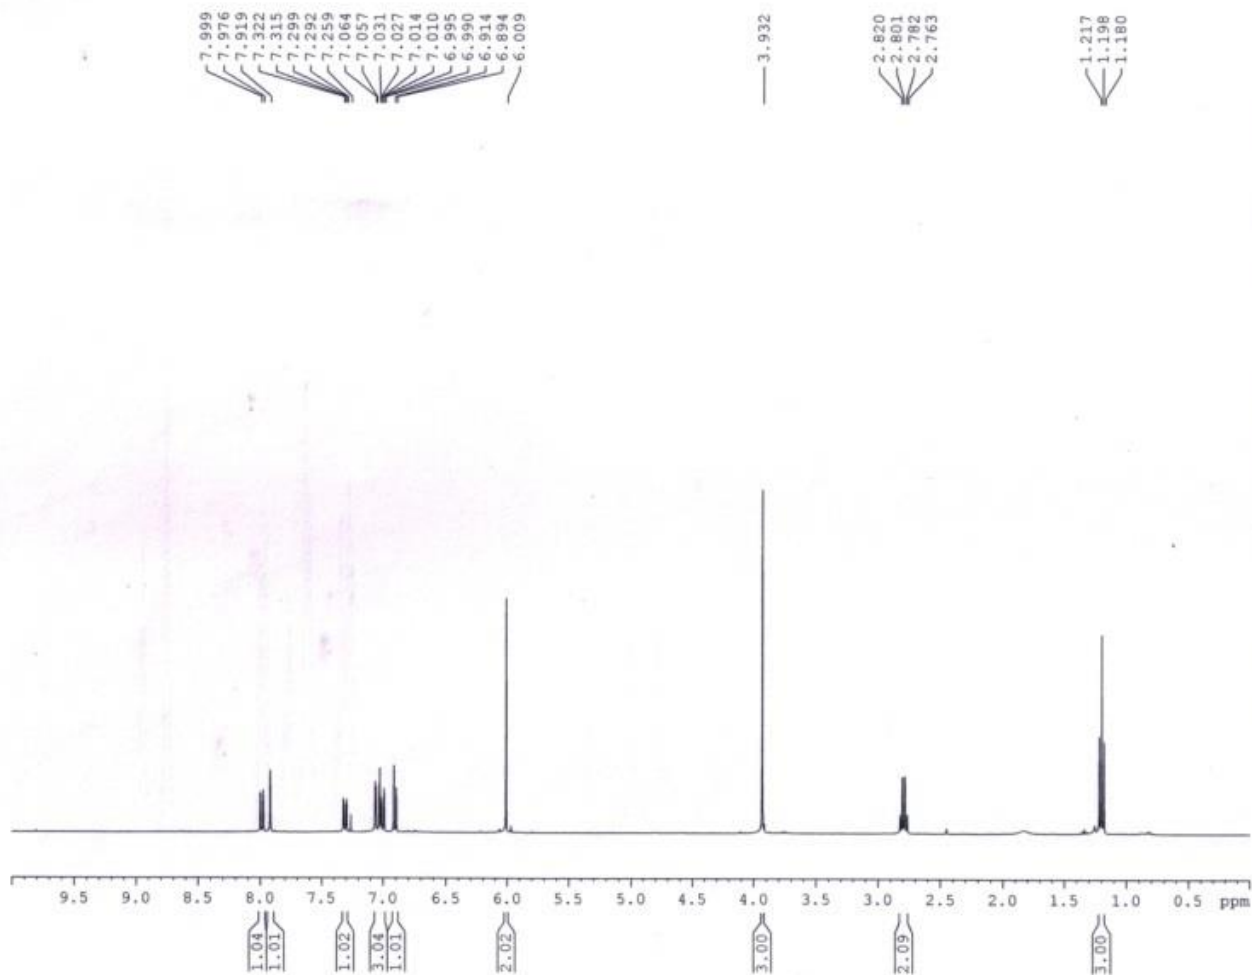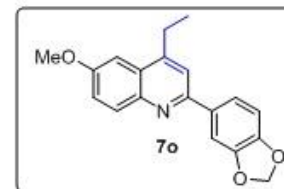

BRUKER

Current Data Parameters  
 NAME Dr. A MAJEE 2019 .  
 EXPNO 418  
 PROCNO 1

F2 - Acquisition Parameters  
 Date\_ 20190801  
 Time\_ 16.47  
 INSTRUM spect  
 PROBHD 5 mm PABBO BB/  
 PULPROG zg30  
 TD 32768  
 SOLVENT CDC13  
 NS 16  
 DS 1  
 SWH 8223.685 Hz  
 FIDRES 0.250967 Hz  
 AQ 1.9922944 sec  
 RG 77.59  
 DW 60.800 usec  
 DE 6.50 usec  
 TE 298.3 K  
 D1 1.00000000 sec  
 TDO 1

----- CHANNEL f1 -----  
 SF01 400.1524711 MHz  
 NUC1 1H  
 P1 14.75 usec  
 PLW1 12.00000000 W

F2 - Processing parameters  
 SI 16384  
 SF 400.1500092 MHz  
 WDW EM  
 SSB 0  
 LB 0.30 Hz  
 GB 0  
 PC 1.00

13C of VBSSM 423/94

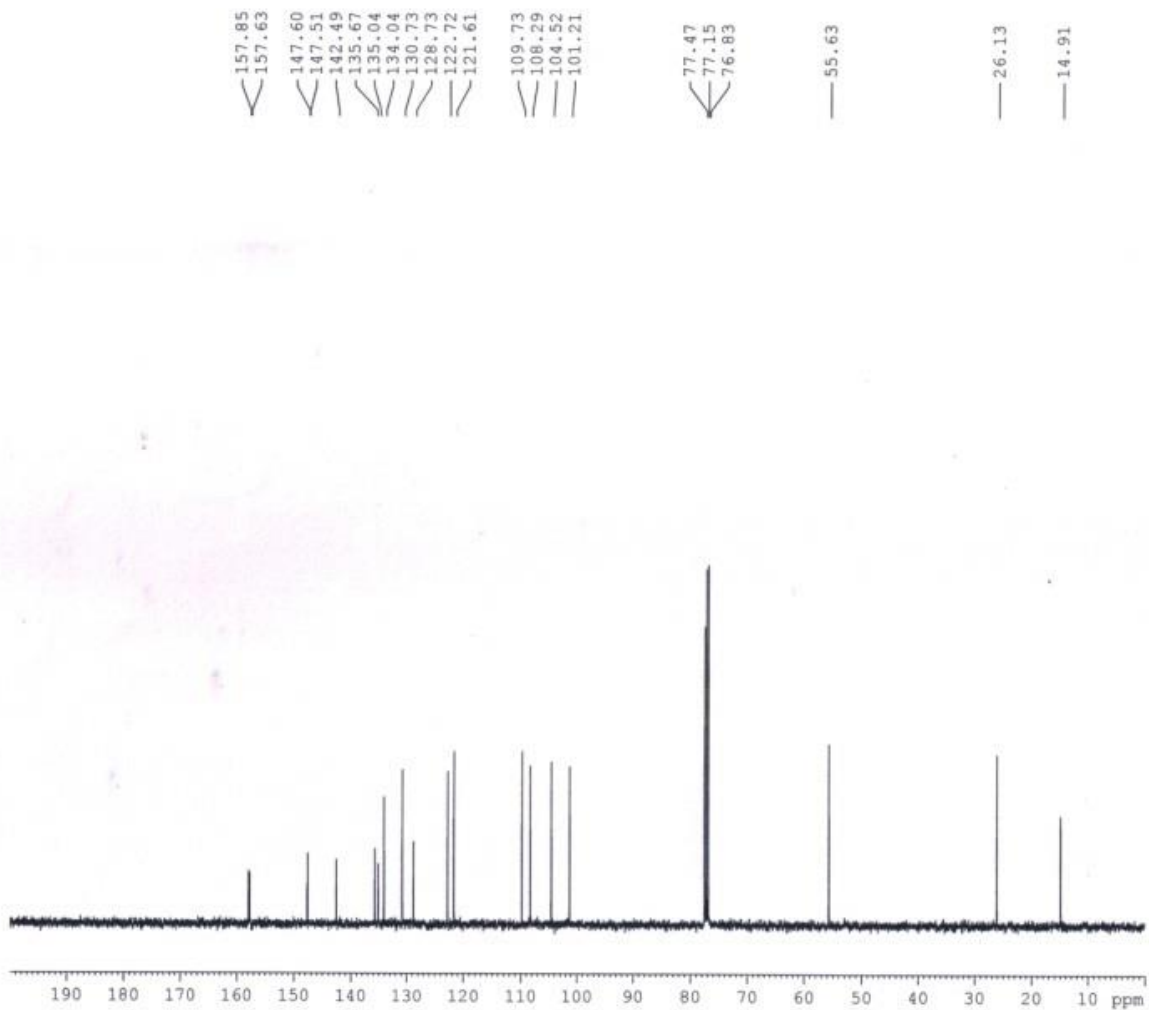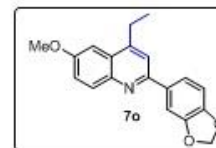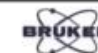

Current Data Parameters  
NAME Dr. A MAJEE 2019  
EXPNO 419  
PROCNO 1

F2 - Acquisition Parameters  
Date\_ 20190601  
Time 16.56  
INSTRUM spect  
PROBHD 5 mm PABBO BB/  
PULPROG zgpg30  
TD 32768  
SOLVENT CDC13  
NS 160  
DS 2  
SWH 24038.461 Hz  
FIDRES 0.733596 Hz  
AQ 0.6815744 sec  
RG 77.59  
DM 20.800 usec  
DE 6.50 usec  
TE 298.2 K  
D1 2.0000000 sec  
D11 0.0300000 sec  
TDO 1

----- CHANNEL f1 -----  
SFO1 100.6278588 MHz  
NUC1 13C  
P1 8.90 usec  
PLW1 54.00000000 W

----- CHANNEL f2 -----  
SFO2 400.1516006 MHz  
NUC2 1H  
PCPDPRG[2] waltz16  
PCPD2 90.00 usec  
PLW2 12.00000000 W  
PLW12 0.32231000 W  
PLW13 0.16212000 W

F2 - Processing parameters  
SI 16384  
SF 100.6177872 MHz  
WDW EM  
SSB 0  
LB 1.00 Hz  
GB 0  
PC 2.00

1H of VBSSM 423/88

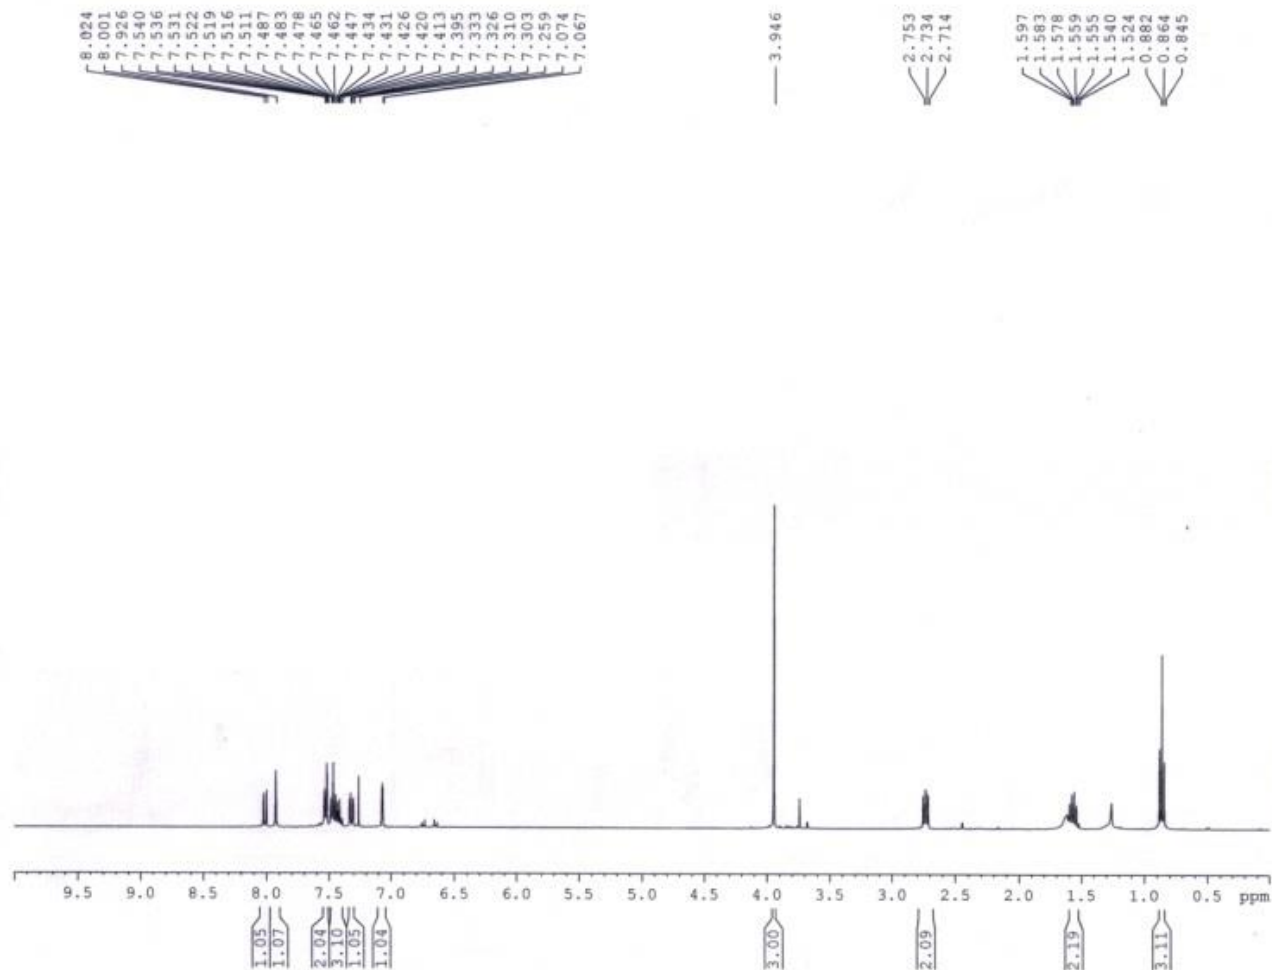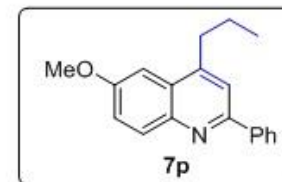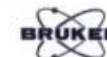

Current Data Parameters  
NAME Dr. A MAJEE 2019  
EXPNO 398  
PROCNO 1

F2 - Acquisition Parameters  
Date\_ 20190723  
Time 11.55  
INSTRUM spect  
PROBHD 5 mm PABBO BB/  
PULPROG zg30  
TD 32768  
SOLVENT CDC13  
NS 24  
DS 1  
SWH 8223.685 Hz  
FIDRES 0.250967 Hz  
AQ 1.9922944 sec  
RG 148.91  
DW 60.800 usec  
DE 6.50 usec  
TE 304.0 K  
D1 1.00000000 sec  
TDO 1

----- CHANNEL f1 -----  
SF01 400.1524711 MHz  
NUC1 1H  
P1 14.75 usec  
PLW1 12.00000000 W

F2 - Processing parameters  
SI 16384  
SF 400.1500092 MHz  
WDW EM  
SSB 0  
LB 0.30 Hz  
GB 0  
PC 1.00

13C of VBSSM 423/88

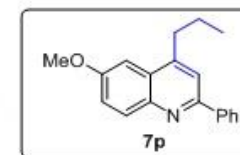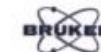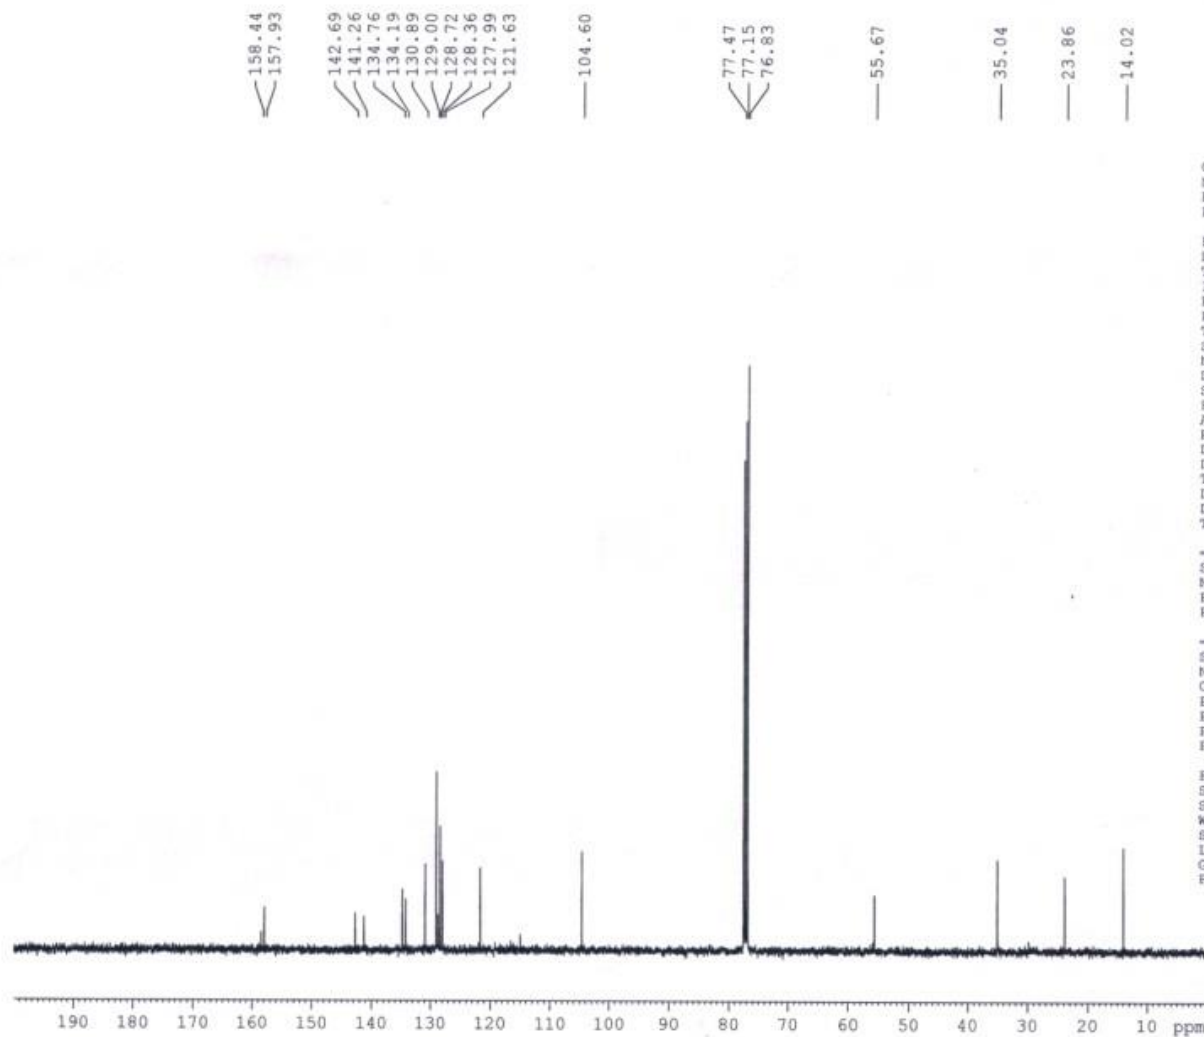

Current Data Parameters  
NAME Dr. A MAJEE 2019  
EXPNO 399  
PROCNO 1

F2 - Acquisition Parameters  
Date\_ 20190723  
Time 12.25  
INSTRUM spect  
PROBHD 5 mm PABBO BB/  
PULPROG zgpg30  
TD 32768  
SOLVENT CDCl3  
NS 640  
DS 2  
SWH 24038.461 Hz  
FIDRES 0.733596 Hz  
AQ 0.6815744 sec  
RG 148.91  
DW 20.800 usec  
DE 6.50 usec  
TE 304.1 K  
D1 2.00000000 sec  
D11 0.03000000 sec  
TD0 1

----- CHANNEL f1 -----  
SFO1 100.6278588 MHz  
NUC1 13C  
P1 8.90 usec  
PLW1 54.00000000 W

----- CHANNEL f2 -----  
SFO2 400.1516006 MHz  
NUC2 1H  
CPDPRG2 waltz16  
PCPD2 90.00 usec  
PLW2 12.00000000 W  
PLW12 0.32231000 W  
PLW13 0.16212000 W

F2 - Processing parameters  
SI 16384  
SF 100.6177825 MHz  
WDW EM  
SSB 0  
LB 1.00 Hz  
GB 0  
PC 2.00



1H of VBSSM 423/98

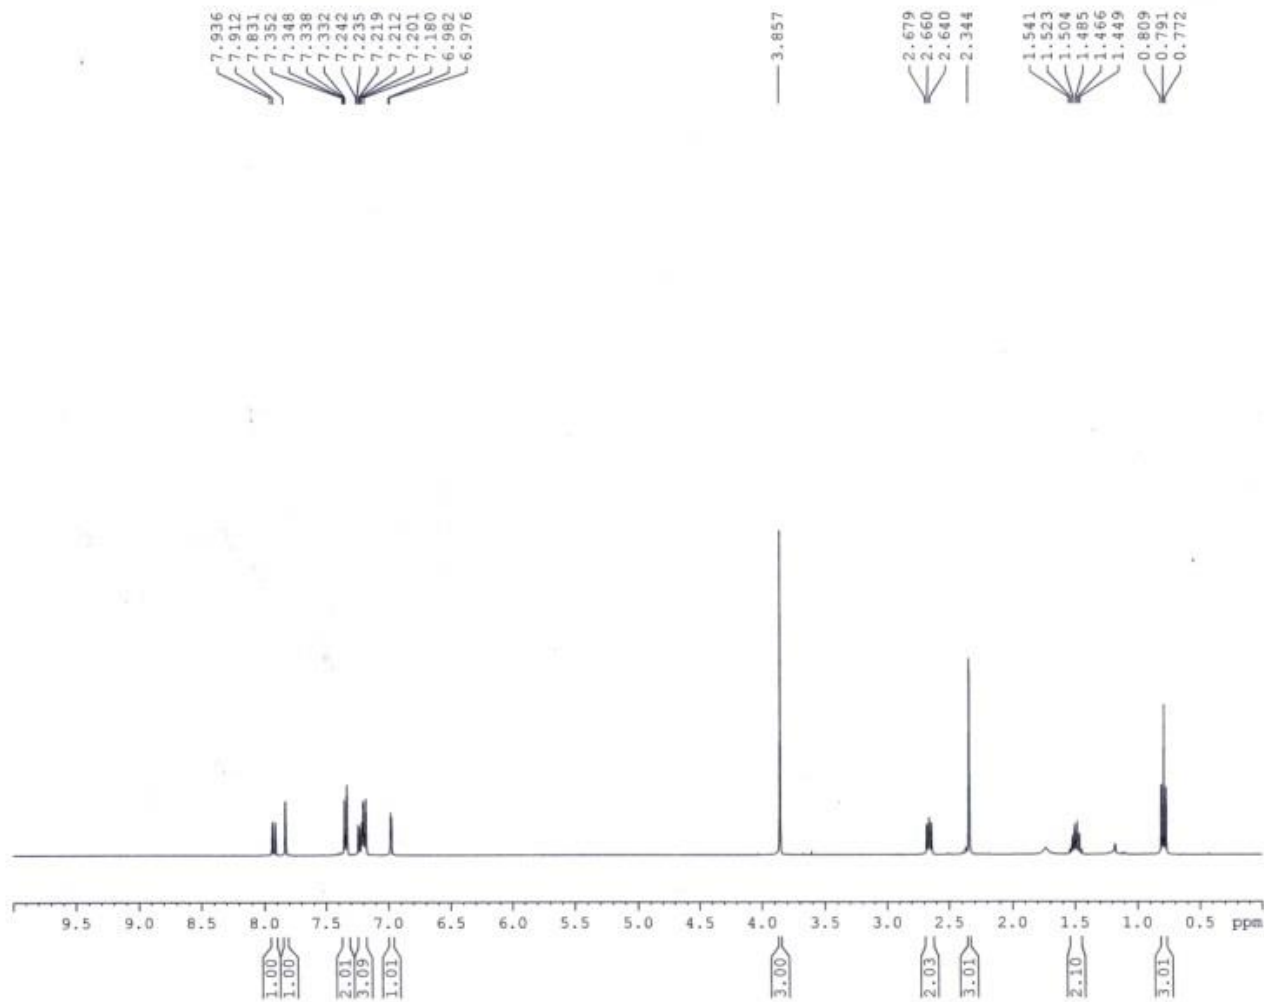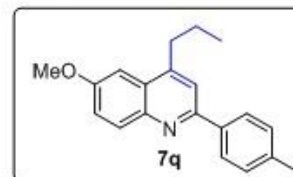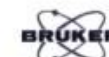

Current Data Parameters  
NAME Dr. A MAJEE 2019  
EXPNO 439  
PROCNO 1

F2 - Acquisition Parameters  
Date\_ 20190804  
Time 17.20  
INSTRUM spect  
PROBHD 5 mm PABBO BB/  
PULPROG zg30  
TD 32768  
SOLVENT CDCl3  
NS 16  
DS 1  
SWH 8223.685 Hz  
FIDRES 0.250967 Hz  
AQ 1.9922944 sec  
RG 77.59  
DW 60.800 usec  
DE 6.50 usec  
TE 298.5 K  
D1 1.00000000 sec  
TD0 1

----- CHANNEL f1 -----  
SFO1 400.1524711 MHz  
NUC1 1H  
P1 14.75 usec  
PLW1 12.00000000 W

F2 - Processing parameters  
SI 16384  
SF 400.1500413 MHz  
WDW EM  
SSB 0  
LB 0.30 Hz  
GB 0  
PC 1.00

13C of VBSSM 423/98

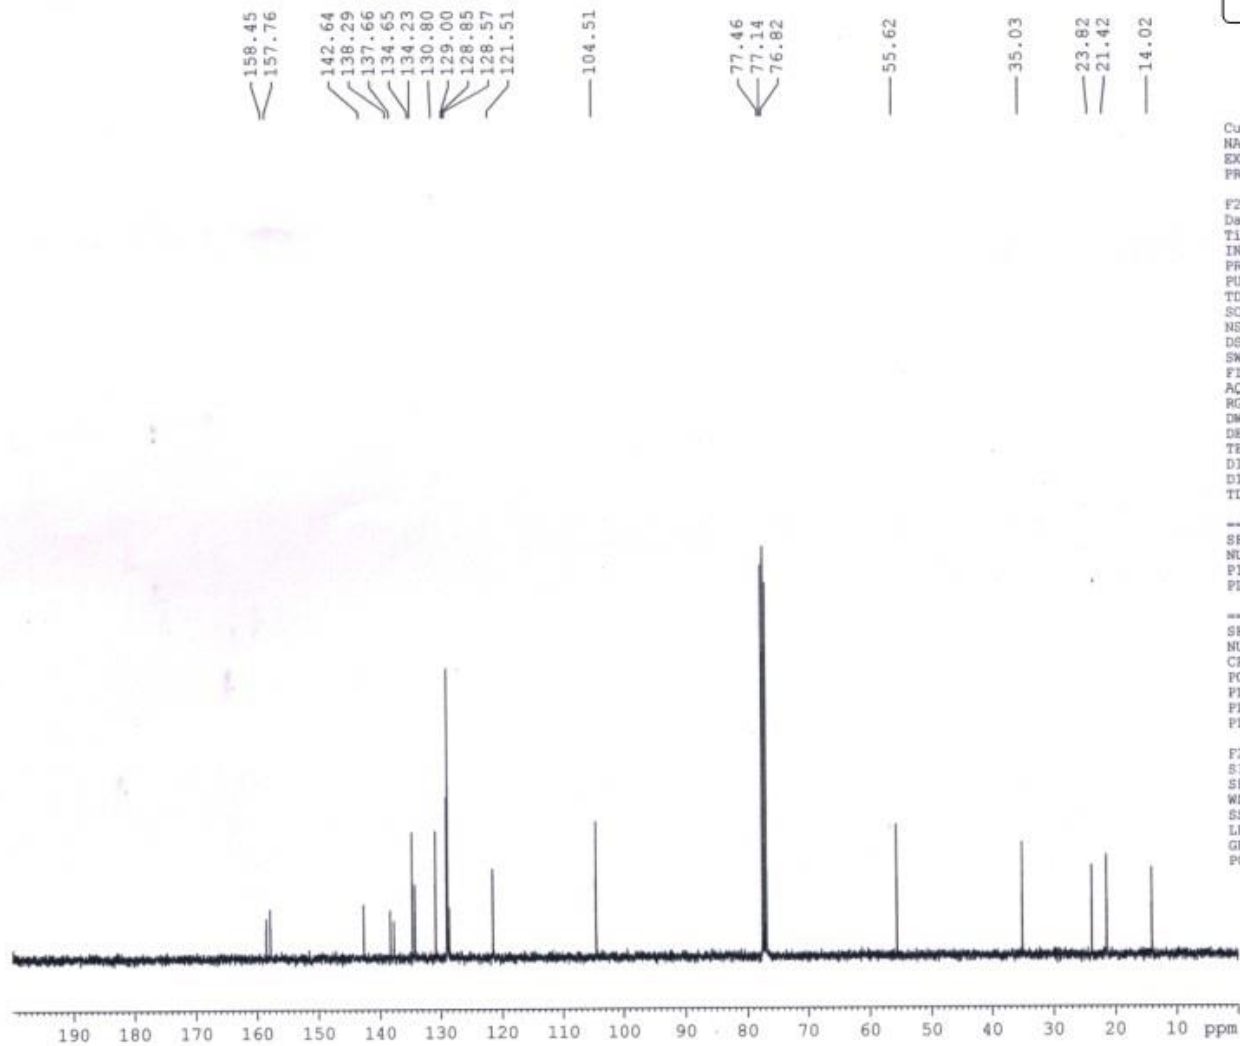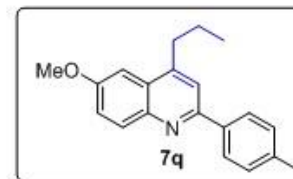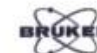

Current Data Parameters  
NAME Dr. A MAJEE 2019  
EXPNO 440  
PROCNO 1

F2 - Acquisition Parameters  
Date\_ 20190804  
Time 17.29  
INSTRUM spect  
PROBHD 5 mm PABBO BB/  
PULPROG zgpg30  
TD 32768  
SOLVENT CDCl3  
NS 172  
DS 2  
SWH 24038.461 Hz  
FIDRES 0.733596 Hz  
AQ 0.4815744 sec  
RG 77.59  
DM 20.800 usec  
DE 6.50 usec  
TE 299.0 K  
D1 2.00000000 sec  
D11 0.03000000 sec  
TDO 1

----- CHANNEL f1 -----  
SFO1 100.6278588 MHz  
NUC1 13C  
P1 8.90 usec  
PLW1 54.00000000 W

----- CHANNEL f2 -----  
SFO2 400.1516006 MHz  
NUC2 1H  
CPDPRG2 waltz16  
PCPD2 90.00 usec  
PLW2 12.00000000 W  
PLW12 0.32231000 W  
PLW13 0.16212000 W

F2 - Processing parameters  
SI 16384  
SF 100.6177859 MHz  
WDW EM  
SSB 0  
LB 1.00 Hz  
GB 0  
PC 2.00

<sup>1</sup>H of VBSSM-423/71

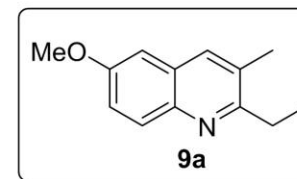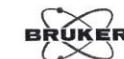

Current Data Parameters  
NAME Dr. A MAJEE 2018  
EXPNO 877  
PROCNO 1

F2 - Acquisition Parameters  
Date\_ 20181212  
Time 17.32  
INSTRUM spect  
PROBHD 5 mm PABBO BB/  
PULPROG zg30  
TD 32768  
SOLVENT CDCl3  
NS 16  
DS 1  
SWH 8223.685 Hz  
FIDRES 0.250967 Hz  
AQ 1.9922944 sec  
RG 93.46  
DW 60.800 usec  
DE 6.50 usec  
TE 298.2 K  
D1 1.0000000 sec  
TD0 1

===== CHANNEL f1 =====  
SFO1 400.1524711 MHz  
NUC1 <sup>1</sup>H  
P1 14.75 usec  
PLW1 12.0000000 W

F2 - Processing parameters  
SI 16384  
SF 400.1500096 MHz  
WDW EM  
SSB 0  
LB 0.30 Hz  
GB 0  
PC 1.00

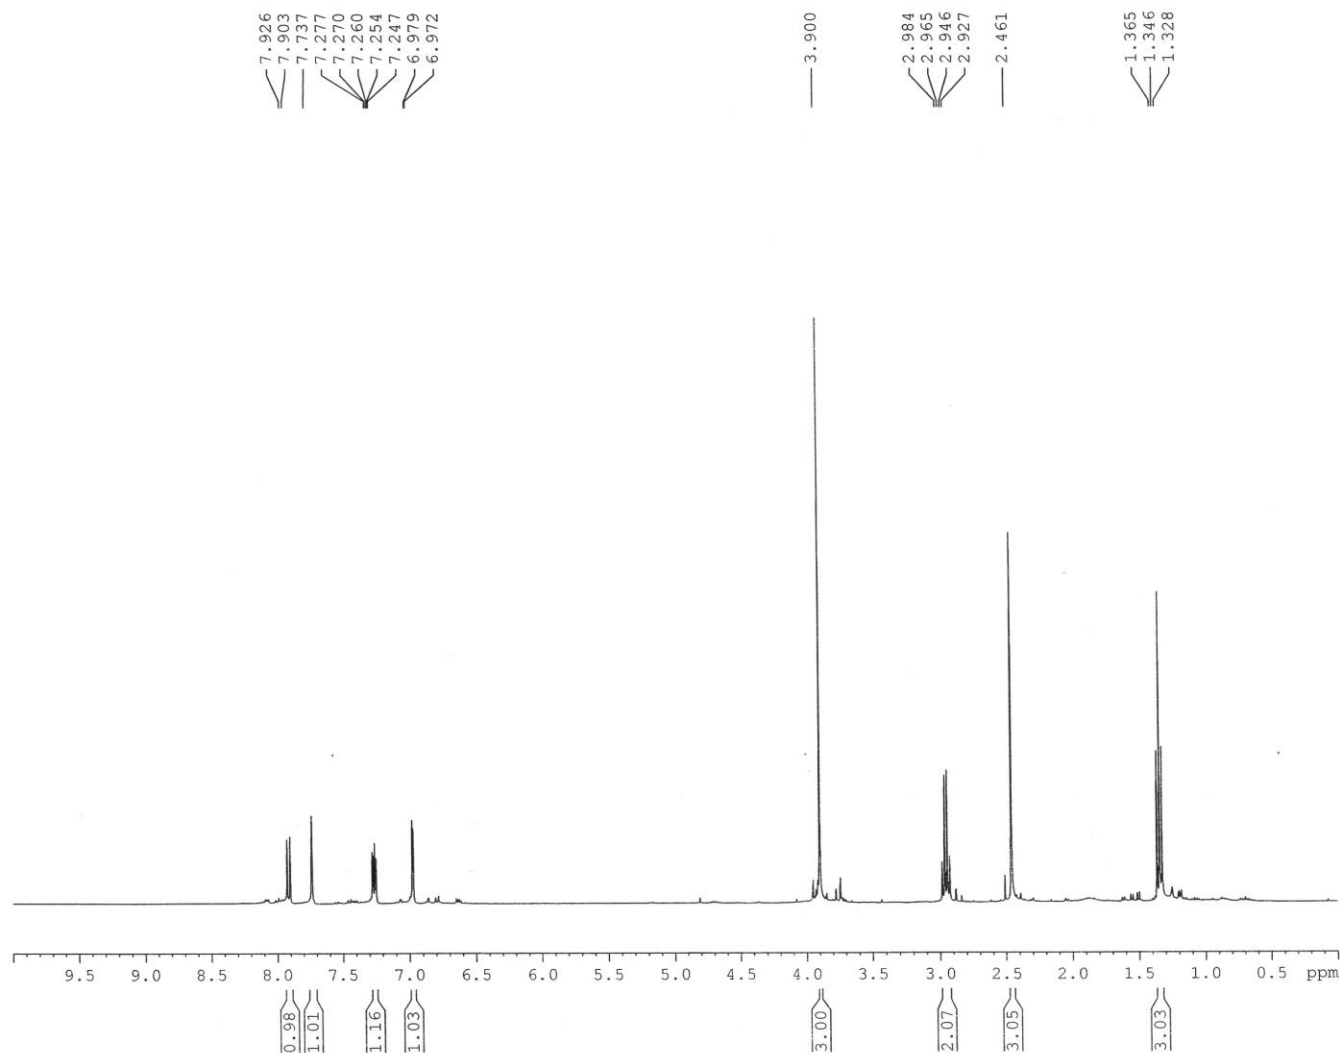

—160.85  
 —157.31  
  
 —142.73  
 135.03  
 130.00  
 129.81  
 128.28  
 —120.84  
  
 —104.64  
  
 77.47  
 77.15  
 76.83  
  
 —55.59  
  
 —29.34  
  
 —19.24  
 —13.10

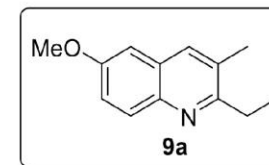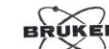

Current Data Parameters  
 NAME Dr. A MAJEE 2018  
 EXPNO 893  
 PROCNO 1

F2 - Acquisition Parameters  
 Date\_ 20181212  
 Time 17.56  
 INSTRUM spect  
 PROBHD 5 mm PABBO BB/  
 PULPROG zgpg30  
 TD 32768  
 SOLVENT CDCl3  
 NS 280  
 DS 2  
 SWH 24038.461 Hz  
 FIDRES 0.733596 Hz  
 AQ 0.6815744 sec  
 RG 186.42  
 DW 20.800 usec  
 DE 6.50 usec  
 TE 299.0 K  
 D1 2.00000000 sec  
 D11 0.03000000 sec  
 TD0 1

==== CHANNEL f1 =====  
 SFO1 100.6278588 MHz  
 NUC1 13C  
 P1 8.90 usec  
 PLW1 54.00000000 W

==== CHANNEL f2 =====  
 SFO2 400.1516006 MHz  
 NUC2 1H  
 CPDPRG[2] waltz16  
 PCPD2 90.00 usec  
 PLW2 12.00000000 W  
 PLW12 0.32231000 W  
 PLW13 0.16212000 W

F2 - Processing parameters  
 SI 16384  
 SF 100.6177856 MHz  
 WDW EM  
 SSB 0  
 LB 1.00 Hz  
 GB 0  
 PC 2.00

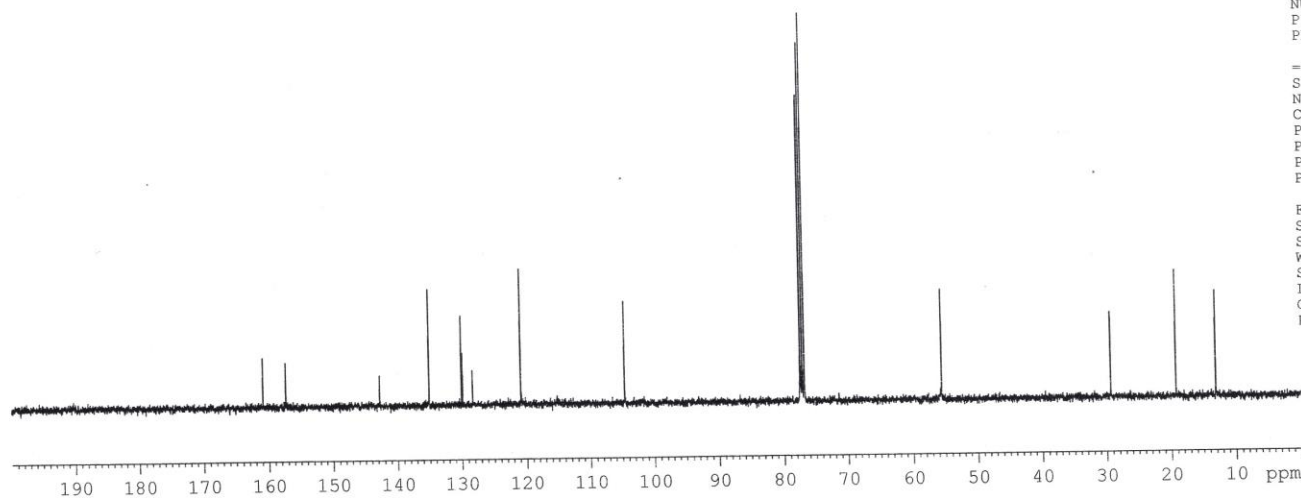

<sup>1</sup>H of VBSSM 423/43

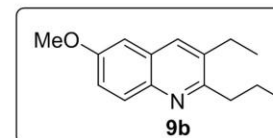

7.902  
7.879  
7.747  
7.259  
7.252  
7.242  
7.237  
7.229  
6.992  
6.985

3.884  
2.918  
2.904  
2.898  
2.892  
2.878  
2.821  
2.802  
2.783  
2.764  
1.817  
1.803  
1.798  
1.792  
1.785  
1.778  
1.774  
1.759  
1.327  
1.309  
1.290  
1.053  
1.035  
1.016

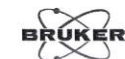

Current Data Parameters  
NAME Dr. A MAJEE 2018  
EXPNO 759  
PROCNO 1

F2 - Acquisition Parameters  
Date\_ 20180921  
Time 14.24  
INSTRUM spect  
PROBHD 5 mm PABBO BB/  
PULPROG zg30  
TD 32768  
SOLVENT CDCl3  
NS 16  
DS 1  
SWH 8223.685 Hz  
FIDRES 0.250967 Hz  
AQ 1.9922944 sec  
RG 87.66  
DW 60.800 usec  
DE 6.50 usec  
TE 296.8 K  
D1 1.00000000 sec  
TD0 1

===== CHANNEL f1 =====  
SF01 400.1524711 MHz  
NUC1 1H  
P1 14.75 usec  
PLW1 12.00000000 W

F2 - Processing parameters  
SI 16384  
SF 400.1500167 MHz  
WDW EM  
SSB 0  
LB 0.30 Hz  
GB 0  
PC 1.00

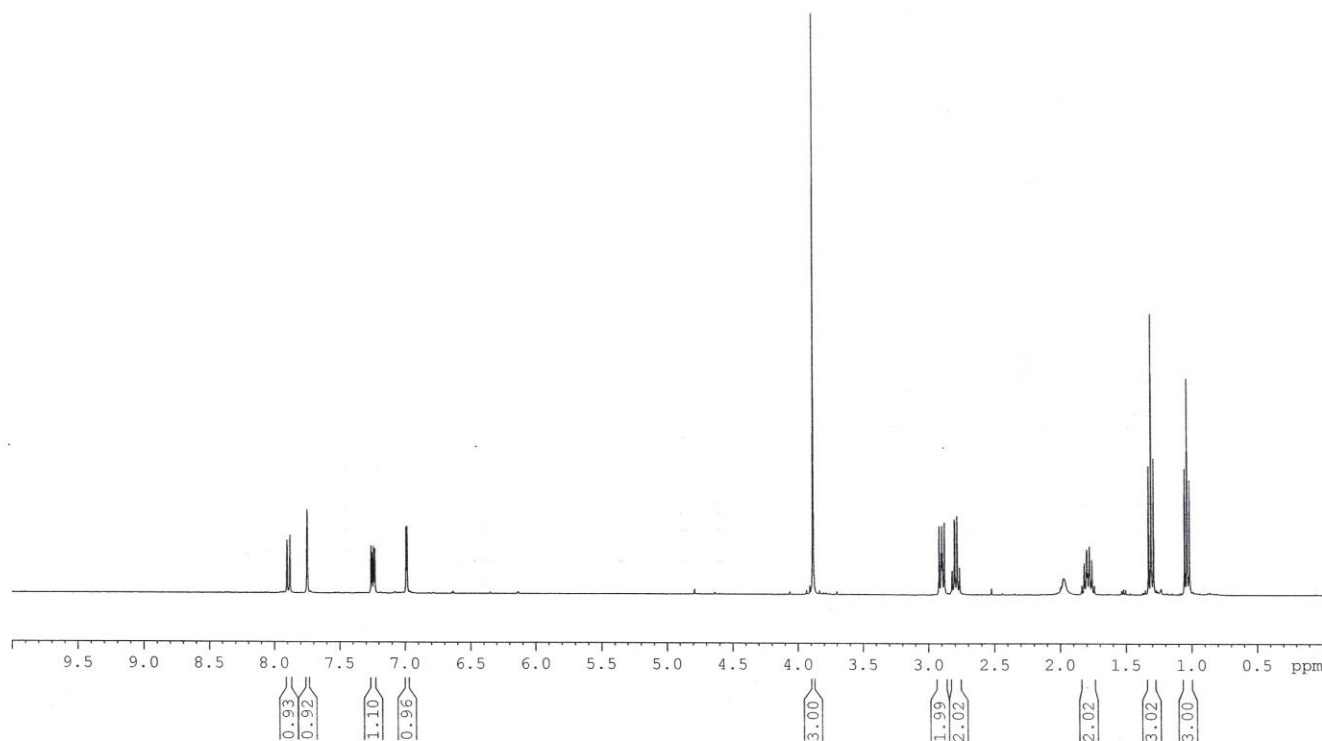

13C of VBSSM 423/43

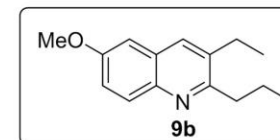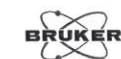

Current Data Parameters  
NAME Dr. A MAJEE 2018  
EXPNO 762  
PROCNO 1

F2 - Acquisition Parameters  
Date\_ 20180921  
Time 14.53  
INSTRUM spect  
PROBHD 5 mm PABBO BB/  
PULPROG zgpg30  
TD 32768  
SOLVENT CDCl3  
NS 220  
DS 2  
SWH 24038.461 Hz  
FIDRES 0.733596 Hz  
AQ 0.6815744 sec  
RG 77.59  
DW 20.800 usec  
DE 6.50 usec  
TE 297.3 K  
D1 2.00000000 sec  
D11 0.03000000 sec  
TD0 1

===== CHANNEL f1 =====  
SFO1 100.6278588 MHz  
NUC1 13C  
P1 8.90 usec  
PLW1 54.00000000 W

===== CHANNEL f2 =====  
SFO2 400.1516006 MHz  
NUC2 1H  
CPDPRG[2] waltz16  
PCPD2 90.00 usec  
PLW2 12.00000000 W  
PLW12 0.32231000 W  
PLW13 0.16212000 W

F2 - Processing parameters  
SI 16384  
SF 100.6177857 MHz  
WDW EM  
SSB 0  
LB 1.00 Hz  
GB 0  
PC 2.00

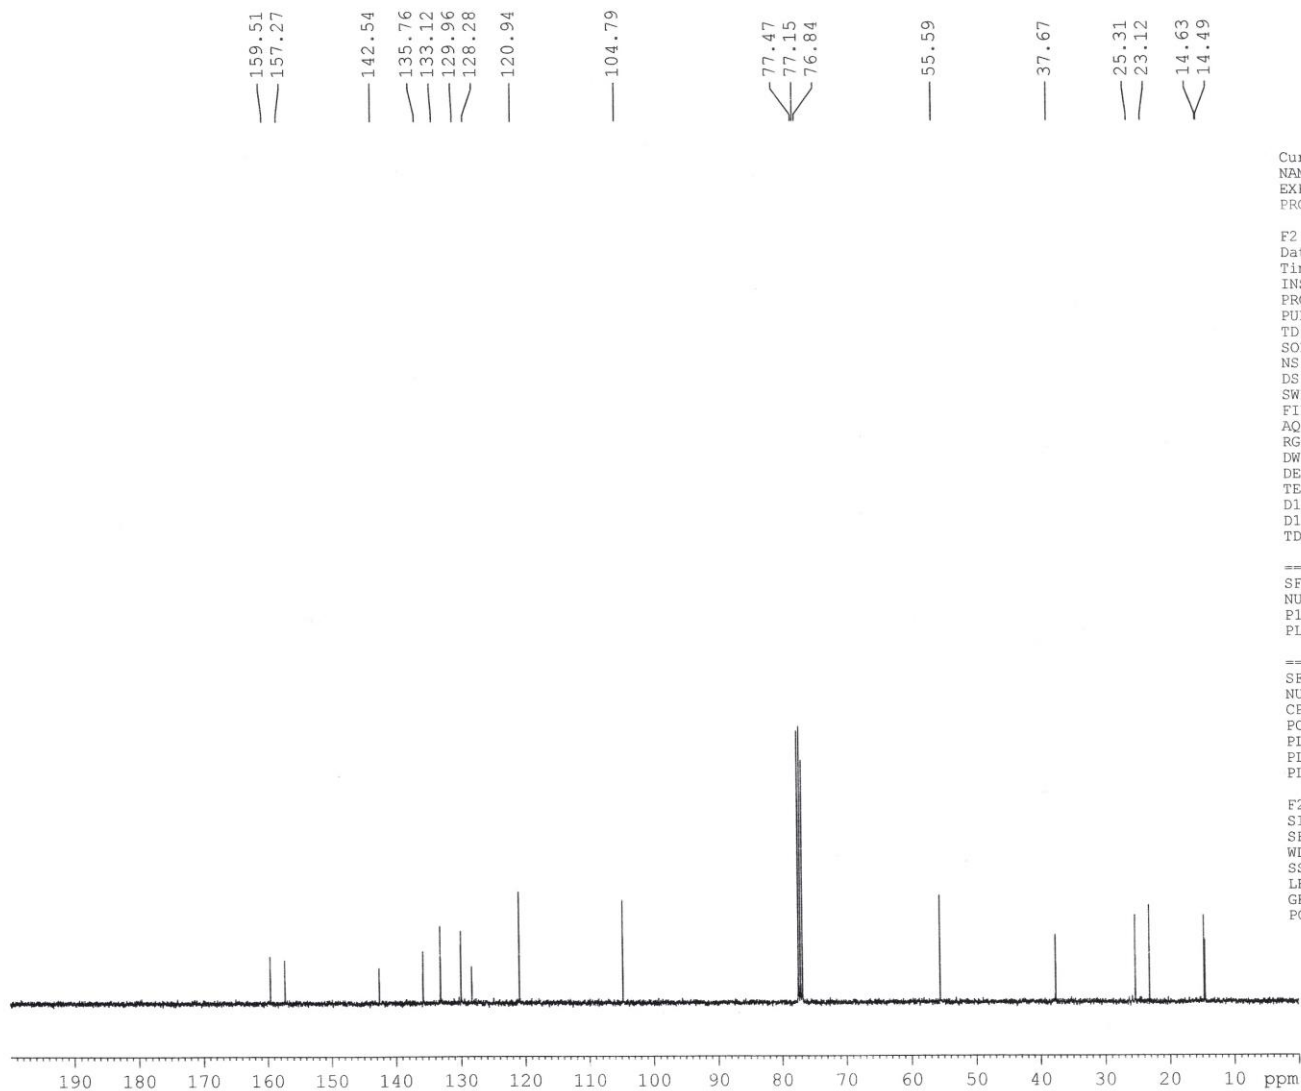

1H of VBSSM-423/int1

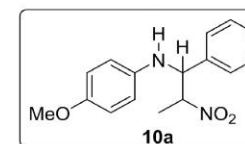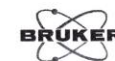

Current Data Parameters  
NAME Dr. A MAJEE 2018  
EXPNO 925  
PROCNO 1

F2 - Acquisition Parameters  
Date\_ 20181231  
Time 12.56  
INSTRUM spect  
PROBHD 5 mm PABBO BB/  
PULPROG zg30  
TD 32768  
SOLVENT CDCl3  
NS 20  
DS 1  
SWH 8223.685 Hz  
FIDRES 0.250967 Hz  
AQ 1.9922944 sec  
RG 168.31  
DW 60.800 usec  
DE 6.50 usec  
TE 294.7 K  
D1 1.00000000 sec  
TD0 1

===== CHANNEL f1 =====  
SFO1 400.1524711 MHz  
NUC1 1H  
P1 14.75 usec  
PLW1 12.00000000 W

F2 - Processing parameters  
SI 16384  
SF 400.1500098 MHz  
WDW EM  
SSB 0  
LB 0.30 Hz  
GB 0  
PC 1.00

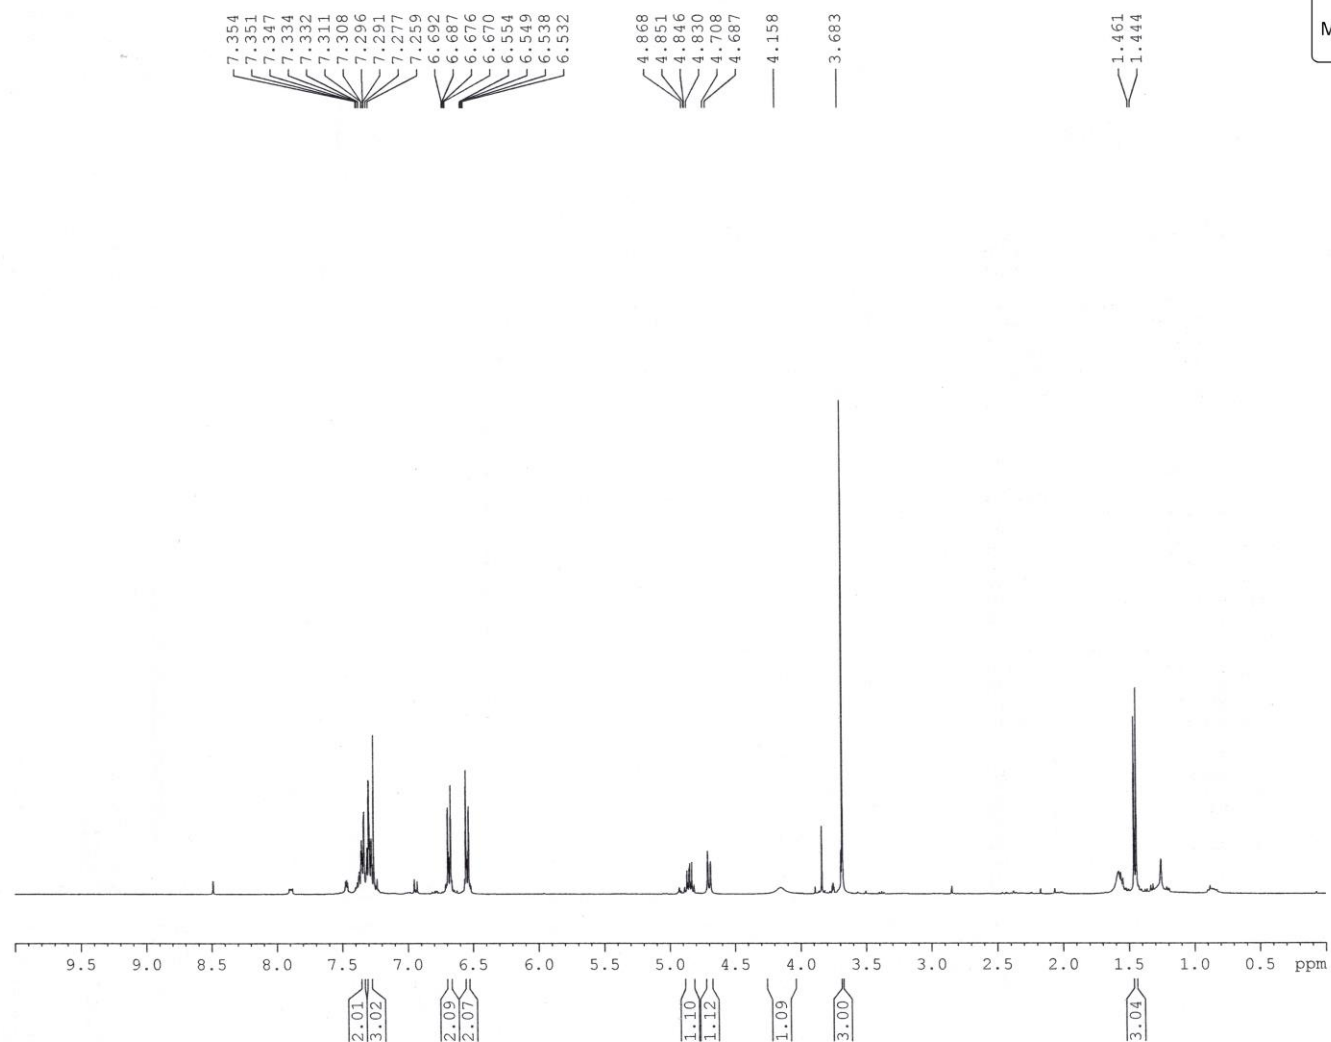

13C of VBSSM 423/int1

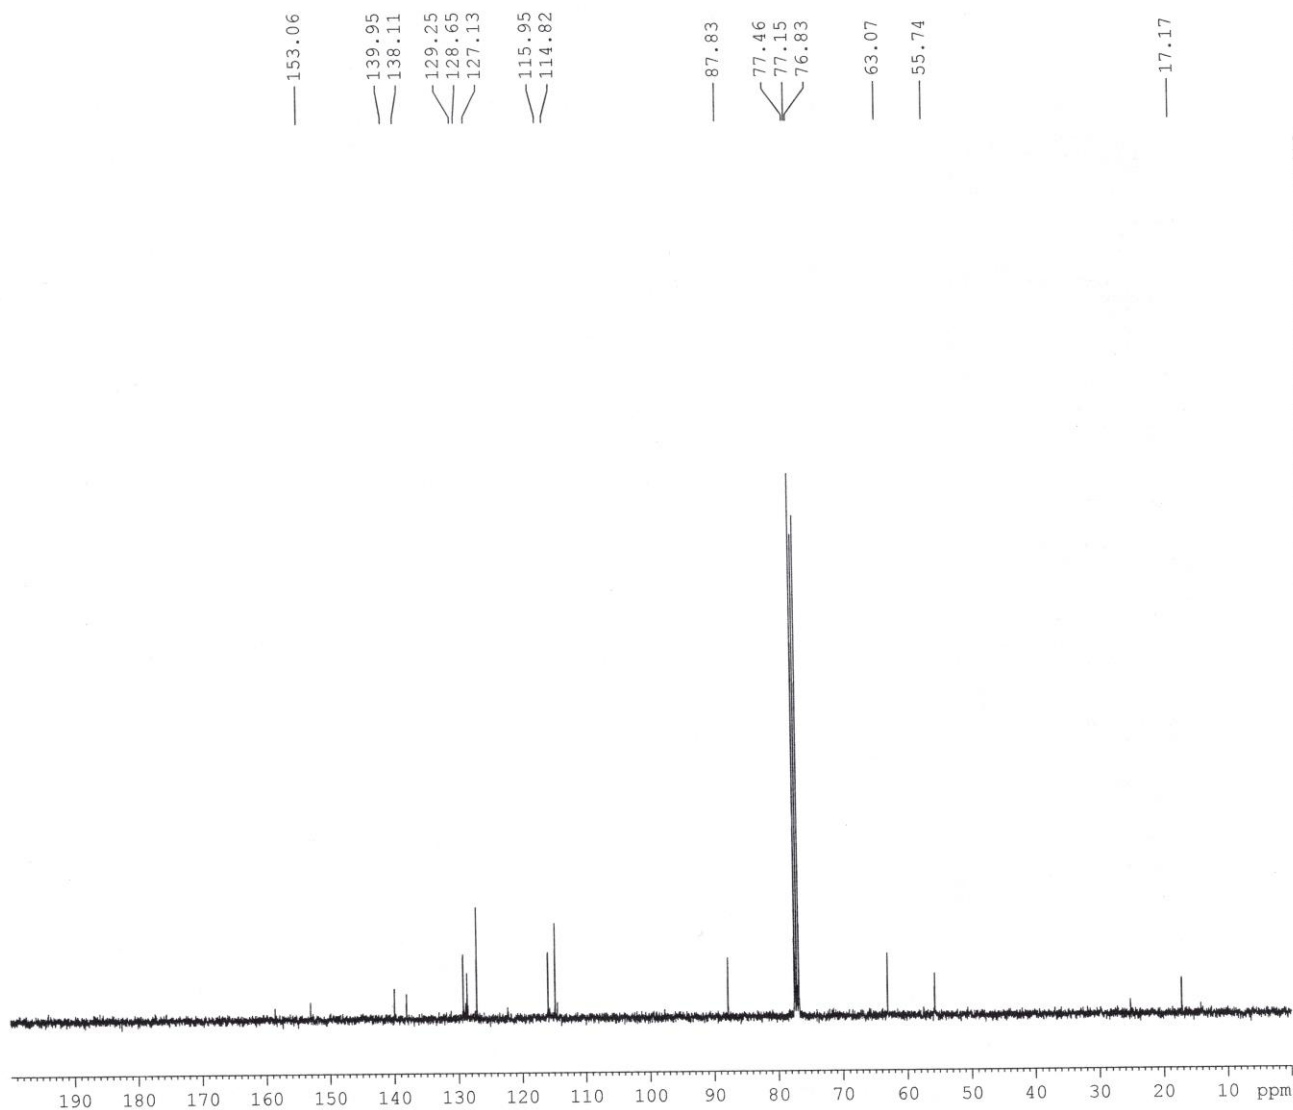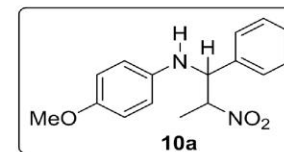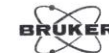

Current Data Parameters  
NAME Dr. A MAJEE 2018  
EXPNO 926  
PROCNO 1

F2 - Acquisition Parameters  
Date\_ 20190110  
Time 12.10  
INSTRUM spect  
PROBHD 5 mm PABBO BB/  
PULPROG zgpg30  
TD 32768  
SOLVENT CDCl3  
NS 640  
DS 2  
SWH 24038.461 Hz  
FIDRES 0.733596 Hz  
AQ 0.6815744 sec  
RG 186.42  
DW 20.800 usec  
DE 6.50 usec  
TE 293.9 K  
D1 2.00000000 sec  
D11 0.03000000 sec  
TD0 1

----- CHANNEL f1 -----  
SFO1 100.6278588 MHz  
NUC1 13C  
P1 8.90 usec  
PLW1 54.00000000 W

----- CHANNEL f2 -----  
SFO2 400.1516006 MHz  
NUC2 1H  
CPDPRG[2] waltz16  
PCPD2 90.00 usec  
PLW2 12.00000000 W  
PLW12 0.32231000 W  
PLW13 0.16212000 W

F2 - Processing parameters  
SI 16384  
SF 100.6177869 MHz  
WDW EM  
SSB 0  
LB 1.00 Hz  
GB 0  
PC 2.00
